# Supplementary material
Source: PubMed Central journal article supplement (PMC8168786)

## Supporting Information

### **Bromine Radical Catalysis by Energy Transfer Photosensitization**

Dian-Feng Chen, Cameron H. Chrisman, and Garret M. Miyake\*

Department of Chemistry, Colorado State University, Ft Collins, Colorado 80523, United States

#### **Table of Contents**

|                                                             |     |
|-------------------------------------------------------------|-----|
| 1. General Considerations .....                             | S2  |
| 2. Substrate Synthesis and Characterization .....           | S3  |
| 2.1 Alkene Synthesis .....                                  | S3  |
| 2.2 Vinylcyclopropane Synthesis .....                       | S5  |
| 3. Complementary Optimization of Conditions .....           | S8  |
| 4. General Reaction Setup and Experimental Procedures ..... | S11 |
| 5. Mechanistic Study .....                                  | S12 |
| 5.1 TEMPO-trapping experiment .....                         | S12 |
| 5.2 Investigation of alternative precatalysts .....         | S13 |
| 5.3 Radical epimerization experiment .....                  | S14 |
| 5.4 Cyclic voltammetry .....                                | S15 |
| 5.5 Stern-Volmer quenching experiment .....                 | S16 |
| 5.6 “On/off” experiment .....                               | S19 |
| 5.7 Determination of quantum yield ( $\Phi$ ) .....         | S20 |
| 6. Characterization of Products .....                       | S22 |
| 7. Reference .....                                          | S46 |
| 8. NMR Spectra .....                                        | S47 |

## 1. General Considerations

Commercial reagents and anhydrous solvents were purchased from *Millipore-Sigma*, *Alfa* and *TCI*, and were used as received unless otherwise indicated. All catalytic reactions were carried out under N<sub>2</sub> with oven-dried vials. Thin layer chromatography was performed on SiliCycle® 250 um, 60A plates. Column chromatography was performed on *SiliCycle®SilicaFlash®* P60, 40-63 um, 60A. Visualization was accomplished with I<sub>2</sub>-silica.

<sup>1</sup>H, <sup>13</sup>C, and <sup>19</sup>F NMR spectra were recorded on a Bruker 400 Hz (101 Hz, 162 Hz and 376 Hz for <sup>13</sup>C, <sup>31</sup>P and <sup>19</sup>F, respectively) spectrometer at ambient temperature. All NMR spectra are referenced to the residual solvent (CHCl<sub>3</sub>) signal. Data for <sup>1</sup>H, <sup>19</sup>F and <sup>31</sup>P NMR are reported as follows: chemical shift (δ ppm), multiplicity (s = singlet, d = doublet, t = triplet, q = quartet, m = multiplet, br = broad), coupling constant (Hz), integration. Data for <sup>13</sup>C NMR are reported as follows: chemical shift (δ ppm).

Mass spectra (MS) were obtained from Colorado State University Central Instrument Facility on an Agilent 6224 Time of flight (TOF) LC-MS spectrometer using ESI+/DART+ ionization model.

## 2. Substrate Synthesis and Characterization

### 2.1 Alkene Synthesis

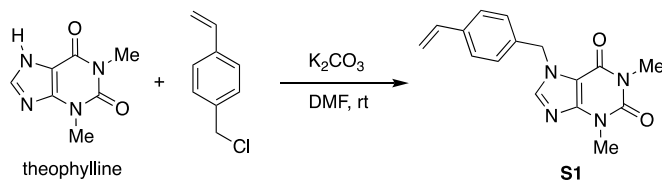

To a solution of theophylline (0.90 g, 5.0 mmol, 1.0 equiv) in 15.0 mL of anhydrous DMF, 4-vinylbenzyl chloride (1.15 g, 7.5 mmol, 1.5 equiv) and  $K_2CO_3$  (1.38g, 10.0 mmol, 2.0 equiv) were added sequentially. The slurry was vigorously stirred at room temperature for 12h. The white solid was filtered off, and the filtrate was diluted with EtOAc (100 mL), washed with  $H_2O$  (50 mL  $\times$  3), brine (50 mL), dried over anhydrous  $Na_2SO_4$ , and concentrated *in vacuo*. The residue was subjected to silica gel chromatography using hexane/acetone (10:1 to 5:1) as the eluent, giving **S1** as a white solid (1.31g, 89% yield).  $^1H$  NMR (400 MHz,  $CDCl_3$ )  $\delta$  7.56 (s, 1H), 7.46 – 7.35 (m, 2H), 7.30 – 7.26 (m, 2H), 6.68 (dd,  $J = 17.6, 10.9$  Hz, 1H), 5.74 (dd,  $J = 17.6, 0.8$  Hz, 1H), 5.48 (s, 2H), 5.27 (dd,  $J = 10.9, 0.8$  Hz, 1H), 3.58 (s, 3H), 3.40 (s, 3H).  $^{13}C$  NMR (101 MHz,  $CDCl_3$ )  $\delta$  155.3, 151.7, 148.9, 140.8, 138.0, 136.0, 134.7, 128.2, 126.9, 114.8, 107.0, 50.1, 29.8, 28.0. **DART-TOF-LC/MS** m/z calcd. for  $C_{16}H_{17}N_4O_2$  [ $M+H^+$ ] 297.1352, found 297.1351.

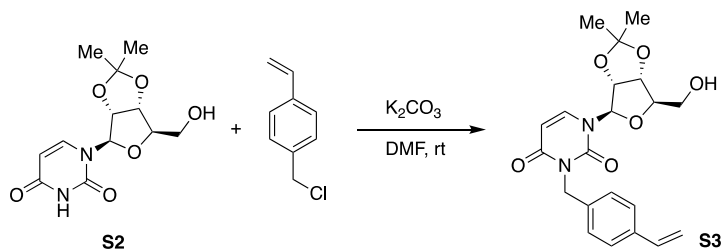

To a solution of protected uridine **S2**<sup>1</sup> (1.42 g, 5.0 mmol, 1.0 equiv) in 15.0 mL of anhydrous DMF, 4-vinylbenzyl chloride (1.15g, 7.5 mmol, 1.5 equiv) and  $K_2CO_3$  (1.38g, 10.0 mmol, 2.0 equiv) were added sequentially. The slurry was vigorously stirred at room temperature. After 12 h, the solid was filtered off. The filtrate was diluted with EtOAc (100 mL), washed with  $H_2O$  (50 mL  $\times$  3), brine (50 mL), dried over anhydrous  $Na_2SO_4$ , and concentrated *in vacuo*. The residue was subjected to silica gel chromatography using hexane/acetone (10:1 to 5:1) as the eluent, giving **S3** as a colorless oil (1.41g, 78% yield).  $^1H$  NMR (400 MHz,  $CDCl_3$ )  $\delta$  7.37 (d,  $J = 8.2$  Hz, 2H), 7.29 (d,  $J = 8.3$  Hz, 2H), 7.22 (d,  $J = 13.3$  Hz, 1H), 6.63 (dd,  $J = 17.6, 10.9$  Hz, 1H), 5.73 (d,  $J = 8.0$  Hz, 1H), 5.66 (dd,  $J = 17.6, 1.0$  Hz, 1H), 5.48 (d,  $J = 2.9$  Hz, 1H), 5.17 (dd,  $J = 10.9, 0.9$  Hz, 1H), 5.08 – 4.88 (m, 4H), 4.23 (q,  $J = 3.1$  Hz, 1H), 3.89 – 3.81 (m, 1H), 3.74 (ddd,  $J = 12.0, 7.5, 3.3$  Hz, 1H), 2.70 (dd,  $J = 7.5, 3.3$  Hz, 1H), 1.52 (s, 3H), 1.30 (s, 3H).  $^{13}C$  NMR (101 MHz,  $CDCl_3$ )  $\delta$  162.4, 151.0, 140.7, 137.1, 136.4, 135.9, 129.5, 126.2, 114.3, 114.0, 102.2, 97.0, 86.9, 83.8, 80.3, 62.7, 43.9, 27.3, 25.3. **ESI-TOF-LC/MS** m/z calcd. for  $C_{21}H_{25}N_2O_6$  [ $M+H^+$ ] 401.1713, found 401.1710.

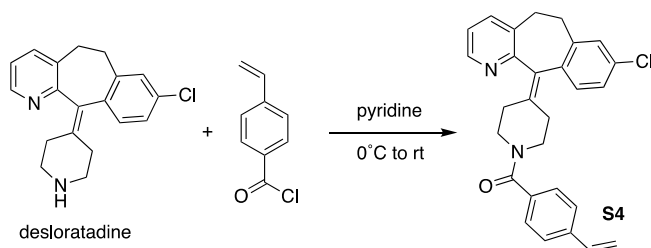

To a solution of desloratadine (1.0 g, 3.2 mmol, 1.0 equiv) in 5.0 mL of anhydrous pyridine at 0 °C, 4-vinylbenzoyl chloride (0.54g, 3.2 mmol, 1.0 equiv) was added dropwise. The mixture was stirred at 0 °C for 30 min, then was warmed up to room temperature and stirred for 12h. The reaction was quenched by addition of sat.  $\text{NH}_4\text{Cl}$  (20 mL), then diluted with  $\text{CH}_2\text{Cl}_2$  (100 mL). The layers were separated, and the aqueous layer was extracted with  $\text{CH}_2\text{Cl}_2$  (10 mL  $\times$  2). The combined organic phase was washed with  $\text{H}_2\text{O}$  (50 mL  $\times$  3), brine (50 mL), dried over anhydrous  $\text{Na}_2\text{SO}_4$ , and concentrated *in vacuo*. The residue was subjected to silica gel chromatography using hexane/acetone (5:1 to 3:1) as the eluent, giving the final product as a white solid (1.12g, 79% yield).  $^1\text{H NMR}$  (400 MHz,  $\text{CDCl}_3$ )  $\delta$  8.38 (brs, 1H), 7.48 – 7.33 (m, 5H), 7.22 – 7.01 (m, 4H), 6.70 (dd,  $J = 17.6, 10.9$  Hz, 1H), 5.77 (dd,  $J = 17.6, 0.8$  Hz, 1H), 5.29 ( $J = 10.9, 0.8$  Hz, 1H), 4.18 (brs, 1H), 3.64 (brs, 1H), 3.45 – 3.13 (m, 4H), 2.92 – 2.73 (m, 4H), 2.70 – 2.15 (m, 4H).  $^{13}\text{C NMR}$  (101 MHz,  $\text{CDCl}_3$ )  $\delta$  170.2, 156.8, 146.7, 139.6, 138.9, 137.6, 136.9, 136.1, 135.2, 134.7, 133.4, 133.0, 130.5, 129.0, 127.3, 126.2, 122.4, 115.2, 31.7, 31.5. **ESI-TOF-LC/MS**  $m/z$  calcd. for  $\text{C}_{28}\text{H}_{26}\text{ClN}_2\text{O}$  [ $\text{M}+\text{H}^+$ ] 441.1734, found 441.1735.

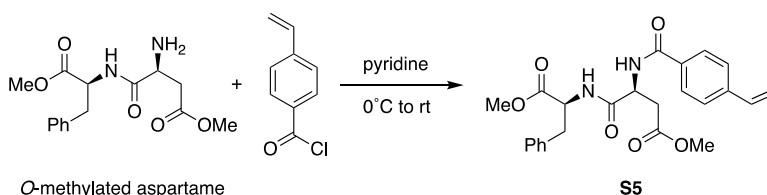

To a solution of O-methylated aspartame<sup>2</sup> (0.72 g, 2.0 mmol, 1.0 equiv) in 4.0 mL of anhydrous pyridine at 0 °C, 4-vinylbenzoyl chloride (0.33g, 2.0 mmol, 1.0 equiv) was added dropwise. The mixture was stirred at 0 °C for 30 min, then was warmed up to room temperature and stirred for 12h. The layers were separated, and the aqueous layer was extracted with  $\text{CH}_2\text{Cl}_2$  (10 mL  $\times$  2). The combined organic phase was washed with  $\text{H}_2\text{O}$  (50 mL $\times$ 3), brine (50 mL), dried over anhydrous  $\text{Na}_2\text{SO}_4$ , and concentrated *in vacuo*. The residue was subjected to silica gel chromatography using  $\text{CH}_2\text{Cl}_2/\text{MeOH}$  (20:1 to 1:1) as the eluent, giving the final product as a colorless oil (0.73g, 83% yield).  $^1\text{H NMR}$  (400 MHz,  $\text{CDCl}_3$ )  $\delta$  7.70 (d,  $J = 8.3$  Hz, 2H), 7.64 (d,  $J = 8.0$  Hz, 1H), 7.48 (d,  $J = 8.3$  Hz, 2H), 7.18 – 7.02 (m, 6H), 6.76 (dd,  $J = 17.6, 10.9$  Hz, 1H), 5.87 (d,  $J = 17.5$  Hz, 1H), 5.39 (d,  $J = 10.9$  Hz, 1H), 5.00 (ddd,  $J = 7.9, 6.4, 3.8$  Hz, 1H), 4.80 (td,  $J = 7.3, 5.3$  Hz, 1H), 3.73 (s, 3H), 3.72 (s, 3H), 3.22 – 2.98 (m, 3H), 2.67 (dd,  $J = 17.0, 6.4$  Hz, 1H).  $^{13}\text{C NMR}$  (101 MHz,  $\text{CDCl}_3$ )  $\delta$  173.1, 171.4, 170.1, 166.7, 141.2, 135.9, 135.6, 132.2, 129.2, 128.5, 127.5, 127.1, 126.4, 116.3, 53.5, 52.4, 52.2, 49.3, 37.7, 34.9. **DART-TOF-LC/MS**  $m/z$  calcd. for  $\text{C}_{24}\text{H}_{30}\text{N}_3\text{O}_6$  [ $\text{M}+\text{NH}_4^+$ ] 456.2135, found 456.2133.



## 2.2 Vinylcyclopropane Synthesis

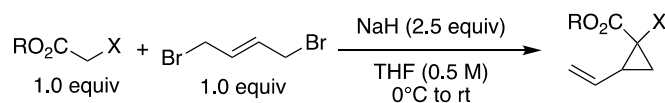

**Procedure A:** To a suspension of 60% NaH (1.0 g, 25.0 mmol, 2.5 equiv) in 25.0 mL of anhydrous THF at 0 °C, *trans*-1,4-dibromo-2-butene (2.1 g, 10.0 mmol, 1.0 equiv) was added in one portion. Appropriate activated methylene compounds (10.0 mmol, 1.0 equiv) was added dropwise over 10 min. The reaction was then vigorously stirred at room temperature. Conversion was assessed by TLC (10% EtOAc in hexanes). Upon completion, the reaction was cooled to 0 °C with an ice bath and carefully quenched by slow addition of sat. NH<sub>4</sub>Cl (10 mL). The mixture was then diluted with H<sub>2</sub>O (30 mL) and ether (100 mL). The layers were separated, and the aqueous phase was extracted with ether (30 mL × 3). The combined organic phase was washed with H<sub>2</sub>O (50 mL × 2), brine (50 mL), dried over anhydrous Na<sub>2</sub>SO<sub>4</sub>, and concentrated *in vacuo*. The residue was purified by silica gel chromatography using hexane/EtOAc as the eluent.

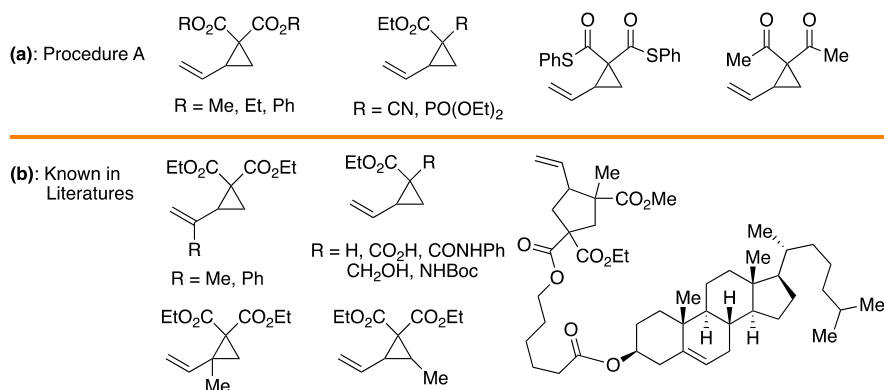

**Figure S1.** Known vinylcyclopropanes synthesized according to **Procedure A** or methods in literature.<sup>3</sup>

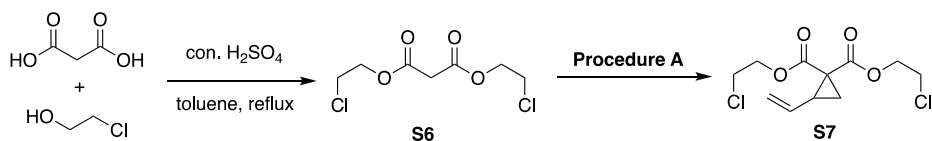

A solution of malonic acid (4.0 g, 38.5 mmol), 2-chloroethanol (13.0 mL, 206 mmol) and concentrated H<sub>2</sub>SO<sub>4</sub> (0.5 mL) in anhydrous toluene (20.0 mL) was heated to reflux for 3 h. After cooling to room temperature, the reaction was carefully quenched by slow addition of 10% NaHCO<sub>3</sub>. The layers were separated, and the aqueous phase was extracted with ether (50 mL × 3). The combined organic phase was washed with 5% NaHCO<sub>3</sub> (50 mL × 2), H<sub>2</sub>O (50 mL × 2) and brine (50 mL), dried over anhydrous Na<sub>2</sub>SO<sub>4</sub>, concentrated *in vacuo* to give crude **S6** as a colorless oil (5.2 g), which was used without further purification. **S7** was then synthesized according to **Procedure A**. Colorless oil, 4.34 g, 40% yield for two steps. <sup>1</sup>H NMR (400 MHz, CDCl<sub>3</sub>) δ 5.48 (ddd, *J* = 17.0, 10.2, 8.1 Hz, 1H), 5.32 (dd, *J* = 17.0, 1.5 Hz, 1H), 5.17 (dd, *J* = 10.2, 1.5 Hz, 1H), 4.50 – 4.28 (m, 4H), 3.90 – 3.40 (m, 4H), 2.65 (dd, *J* = 9.0, 7.7 Hz, 1H), 1.79 (dd, *J* = 7.7, 5.0 Hz, 1H), 1.64 (dd, *J*

= 9.0, 5.0 Hz, 1H).  $^{13}\text{C}$  NMR (101 MHz,  $\text{CDCl}_3$ )  $\delta$  169.0, 166.7, 132.4, 119.2, 65.1, 65.0, 41.3, 41.2, 35.6, 31.8, 20.8. **DART-TOF-LC/MS**  $m/z$  calcd. for  $\text{C}_{11}\text{H}_{18}\text{Cl}_2\text{NO}_4$  [ $\text{M}+\text{NH}_4^+$ ] 298.0613, found 298.0611.

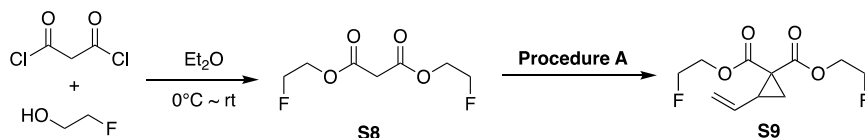

To a solution of 2-fluoroethanol (1.41 mL, 24.0 mmol) in anhydrous  $\text{Et}_2\text{O}$  (100 mL) at  $0^\circ\text{C}$ , malonyl chloride (2.82 g, 38.5 mmol) was added dropwise. The reaction was vigorously stirred at room temperature. After 12h, the reaction was carefully quenched by slow addition of 10%  $\text{NaHCO}_3$ . The layers were separated, and the aqueous phase was extracted with ether (50 mL  $\times$  2). The combined organic layer was washed with 5%  $\text{NaHCO}_3$  (100 mL),  $\text{H}_2\text{O}$  (100 mL) and brine (100 mL), dried over anhydrous  $\text{Na}_2\text{SO}_4$ , concentrated *in vacuo* to give crude **S8** as a colorless oil, which was used without further purification. **S9** was then synthesized according to **Procedure A**. Colorless oil, 2.89 g, 57% yield for two steps.  $^1\text{H}$  NMR (400 MHz,  $\text{CDCl}_3$ )  $\delta$  5.47 (ddd,  $J = 17.0, 10.1, 8.1$  Hz, 1H), 5.36 – 5.28 (m, 1H), 5.19 – 5.15 (m, 1H), 4.68 – 4.62 (m, 2H), 4.56 – 4.52 (m, 2H), 4.51 – 4.26 (m, 4H), 2.65 (dd,  $J = 9.0, 7.9$  Hz, 1H), 1.79 (dd,  $J = 7.7, 5.0$  Hz, 1H), 1.64 (dd,  $J = 9.0, 5.0$  Hz, 1H).  $^{13}\text{C}$  NMR (101 MHz,  $\text{CDCl}_3$ )  $\delta$  169.2, 166.9, 132.4, 119.2, 81.9 (d,  $J = 12.2$  Hz), 80.2 (d,  $J = 12.2$  Hz), 64.5 (d,  $J = 14.7$  Hz), 64.2 (d,  $J = 14.7$  Hz), 35.6, 31.8, 20.8.  $^{19}\text{F}$  NMR (376 MHz,  $\text{CDCl}_3$ )  $\delta$  -224.7, -224.9. **DART-TOF-LC/MS**  $m/z$  calcd. for  $\text{C}_{11}\text{H}_{18}\text{F}_2\text{NO}_4$  [ $\text{M}+\text{NH}_4^+$ ] 266.1204, found 266.1207.

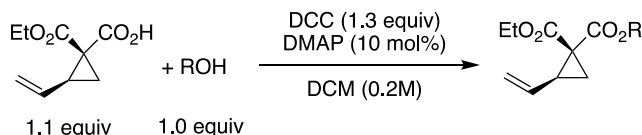

**Procedure B:** To a solution of 1-(ethoxycarbonyl)-2-vinylcyclopropane-1-carboxylic acid<sup>3b</sup> (1.1 equiv.) in anhydrous DCM (0.2 M) at  $0^\circ\text{C}$ , appropriate alcohol (1.0 equiv), DMAP (0.10 equiv.), and DCC (1.3 equiv.) was sequentially added. The mixture was then vigorously stirred at room temperature for 12h. The white precipitate was filtered off and the filtrate was concentrated *in vacuo*. The residue was purified by silica gel chromatography using hexane/ $\text{EtOAc}$  as the eluent.

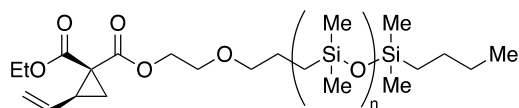

Synthesized from 1-(ethoxycarbonyl)-2-vinylcyclopropane-1-carboxylic acid and 1 kDa monocarbinol terminated polydimethylsiloxane (5.0 mmol scale). Colorless oil, 5.23g, 88% yield.  $^1\text{H}$  NMR (400 MHz,  $\text{CDCl}_3$ )  $\delta$  5.44 (ddd,  $J = 17.0, 10.2, 8.3$  Hz, 1H), 5.29 (dd,  $J = 17.2, 1.6$  Hz, 1H), 5.13 (dd,  $J = 10.1, 1.7$  Hz, 1H), 4.35 – 4.07 (m, 4H), 3.62 (t,  $J = 5.0$  Hz, 2H), 3.41 (t,  $J = 7.0$  Hz, 2H), 2.60 (q,  $J = 8.3$  Hz, 1H), 1.71 (dd,  $J = 7.6, 4.9$  Hz, 1H), 1.64 – 1.50 (m, 3H), 1.36 – 1.16 (m, 7H), 0.92 – 0.78 (m, 3H), 0.59 – 0.46 (m, 4H), 0.09 – 0.03 (m, 89H).  $^{13}\text{C}$  NMR (101 MHz,  $\text{CDCl}_3$ )  $\delta$  168.6, 166.2, 132.0, 117.5,

73.1, 67.2, 63.7, 60.4, 34.8, 30.3, 25.3, 24.4, 22.4, 19.5, 16.9, 13.1, 13.0, 12.8, 0.4, 0.1, 0.0, -0.4, -0.9, -1.0.  $M_n$  (NMR) = 1.4 kDa.

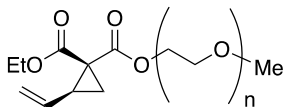

Synthesized from 1-(ethoxycarbonyl)-2-vinylcyclopropane-1-carboxylic acid and PEG 550 (5.0 mmol scale). Colorless oil, 5.23g, 88% yield.  $^1\text{H NMR}$  (400 MHz,  $\text{CDCl}_3$ )  $\delta$  5.43 (ddd,  $J = 17.0, 10.1, 8.2$  Hz, 1H), 5.28 (dd,  $J = 17.1, 1.6$  Hz, 1H), 5.13 (dd,  $J = 10.0, 1.7$  Hz, 1H), 4.33 – 4.13 (m, 4H), 3.68 (t,  $J = 4.9$  Hz, 2H), 3.65 – 3.61 (m, 34H), 3.55 – 3.52 (m, 2H), 3.37 (s, 3H), 2.58 (q,  $J = 8.3$  Hz, 1H), 1.70 (dd,  $J = 7.6, 4.9$  Hz, 1H), 1.56 (dd,  $J = 9.0, 4.9$  Hz, 1H), 1.25 (t,  $J = 7.1$  Hz, 3H).  $^{13}\text{C NMR}$  (101 MHz,  $\text{CDCl}_3$ )  $\delta$  1169.6, 167.2, 133.0, 118.6, 71.9, 70.63, 70.60, 70.57, 70.51, 68.8, 64.6, 61.5, 59.0, 35.8, 31.3, 20.5, 14.2.  $M_n$  (NMR) = 625.

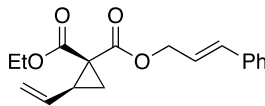

Synthesized from 1-(ethoxycarbonyl)-2-vinylcyclopropane-1-carboxylic acid and cinnamyl alcohol (2.0 mmol scale). Colorless oil, 0.49 g, 82% yield.  $^1\text{H NMR}$  (400 MHz,  $\text{CDCl}_3$ )  $\delta$  7.35 – 7.14 (m, 5H), 6.59 (d,  $J = 15.8$  Hz, 1H), 6.24 – 6.13 (m, 1H), 5.36 (dd,  $J = 10.0, 8.1$  Hz, 1H), 5.23 (dd,  $J = 17.0, 1.6$  Hz, 1H), 5.07 (dd,  $J = 10.0, 1.6$  Hz, 1H), 4.80 – 4.65 (m, 2H), 4.24 – 4.05 (m, 2H), 2.54 (dd,  $J = 9.0, 7.6$  Hz, 1H), 1.66 (dd,  $J = 7.6, 4.9$  Hz, 1H), 1.52 (dd,  $J = 9.0, 4.9$  Hz, 1H), 1.18 (t,  $J = 7.1$  Hz, 3H).  $^{13}\text{C NMR}$  (100 MHz,  $\text{CDCl}_3$ )  $\delta$  169.5, 167.3, 136.1, 134.3, 133.0, 128.6, 128.1, 126.6, 122.7, 118.6, 66.1, 61.5, 35.9, 31.3, 20.5, 14.2. **DART-TOF-LC/MS**  $m/z$  calcd. for  $\text{C}_{18}\text{H}_{24}\text{NO}_4$  [ $\text{M}+\text{NH}_4^+$ ] 318.1705, found 318.1705.

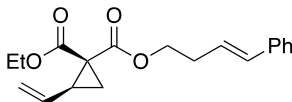

Synthesized from 1-(ethoxycarbonyl)-2-vinylcyclopropane-1-carboxylic acid and *trans*-4-phenylbut-3-en-1-ol (2.0 mmol scale). Colorless oil, 0.44 g, 70% yield.  $^1\text{H NMR}$  (400 MHz,  $\text{CDCl}_3$ )  $\delta$  7.30 – 7.09 (m, 5H), 6.39 (d,  $J = 15.9$  Hz, 1H), 6.07 (dt,  $J = 15.7, 7.0$  Hz, 1H), 5.35 (ddd,  $J = 16.6, 10.1, 8.3$  Hz, 1H), 5.19 (dd,  $J = 17.0, 1.6$  Hz, 1H), 5.04 (dd,  $J = 10.0, 1.6$  Hz, 1H), 4.31 – 4.02 (m, 4H), 2.56 – 2.40 (m, 3H), 1.61 (dd,  $J = 7.5, 4.9$  Hz, 1H), 1.47 (dd,  $J = 9.0, 4.9$  Hz, 1H), 1.14 (t,  $J = 7.1$  Hz, 3H).  $^{13}\text{C NMR}$  (100 MHz,  $\text{CDCl}_3$ )  $\delta$  169.6, 167.3, 137.2, 133.1, 132.6, 128.5, 127.3, 126.1, 125.3, 118.5, 64.7, 61.5, 35.9, 32.3, 31.2, 20.5, 14.2. **DART-TOF-LC/MS**  $m/z$  calcd. for  $\text{C}_{19}\text{H}_{26}\text{NO}_4$  [ $\text{M}+\text{NH}_4^+$ ] 332.1862, found 332.1860.

### 3. Complementary Optimization of Conditions

**Table S1.** Single-electron oxidation of bromide salts to generate bromine radicals for the [3+2] cycloaddition of **1** and styrene. <sup>a</sup>

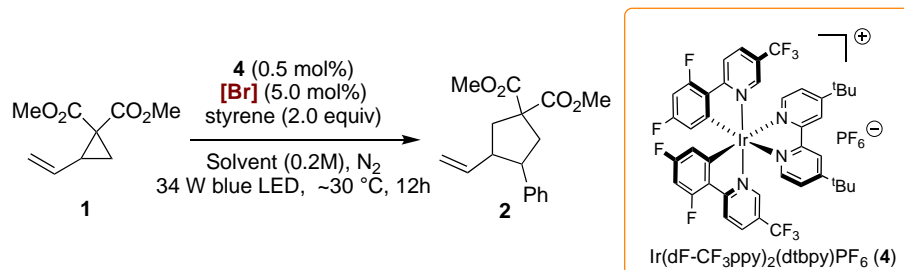

| Entry | <b>[Br]</b> | Solvent | NMR Yield (%) <sup>b</sup> |
|-------|-------------|---------|----------------------------|
| 1     | NaBr        | MeCN    | 0                          |
| 2     | KBr         | MeCN    | 0                          |
| 3     | LiBr        | MeCN    | 0                          |
| 4     | TBAB        | MeCN    | 0                          |
| 5     | NaBr        | DMSO    | 0                          |
| 6     | KBr         | DMSO    | 0                          |
| 7     | LiBr        | DMSO    | 0                          |
| 8     | TBAB        | DMSO    | 0                          |
| 9     | NaBr        | DMF     | 0                          |
| 10    | KBr         | DMF     | 0                          |
| 11    | LiBr        | DMF     | 0                          |
| 12    | TBAB        | DMF     | 0                          |
| 13    | LiBr        | acetone | 0                          |
| 14    | TBAB        | acetone | 0                          |
| 15    | LiBr        | THF     | 0                          |
| 16    | TBAB        | THF     | 0                          |
| 17    | LiBr        | MeOH    | 0                          |
| 18    | TBAB        | MeOH    | 0                          |

<sup>a</sup>General reaction conditions: **1** (0.2 mmol), styrene (0.4 mmol), **4** (0.5%), bromide salt (5.0 %), anhydrous solvent (1.0 mL), 34 W Kessil blue LED. <sup>b</sup>Trimethoxybenzene was used as an internal standard. TBAB = tetrabutylammonium bromide

**Table S2.** Solvent effect in the [3+2] cycloaddition of **1** and styrene using cinnamyl bromide as the precatalyst.<sup>a</sup>

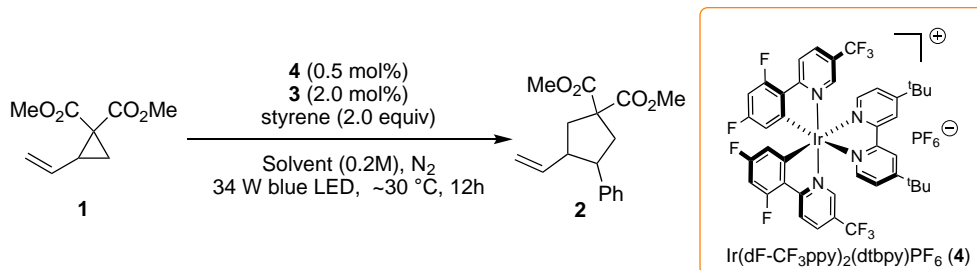

| Entry | Solvent | NMR Yield (%) <sup>b</sup> |
|-------|---------|----------------------------|
| 1     | MeCN    | < 5                        |
| 2     | acetone | < 5                        |
| 3     | DMF     | 11                         |
| 4     | THF     | 0                          |
| 5     | MeOH    | 0                          |
| 6     | benzene | 0                          |
| 7     | DMSO    | 95                         |
| 8     | NMP     | 22                         |
| 9     | DCM     | 0                          |
| 10    | DCE     | 0                          |
| 11    | PhCl    | < 5                        |

<sup>a</sup>Reaction conditions: **1** (0.2 mmol), styrene (0.4 mmol), **4** (0.5%), cinnamyl bromide **3** (2.0 %), anhydrous solvent (1.0 mL), 34 W Kessil blue LED. <sup>b</sup>Trimethoxybenzene was used as an internal standard.

**Table S3.** Examination of precatalyst (**3**) loading in the [3+2] cycloaddition of **1** and styrene.<sup>a</sup>

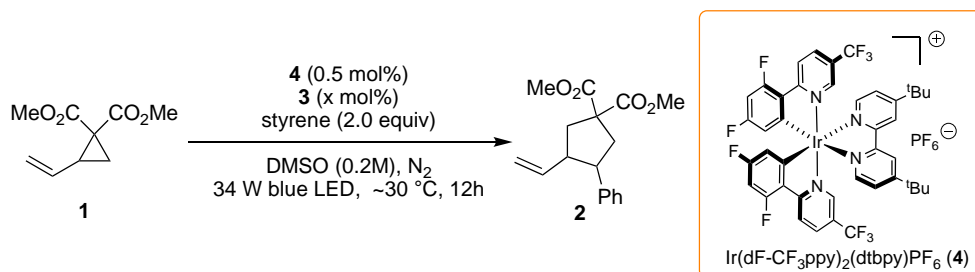

| Entry | x    | NMR Yield % <sup>b</sup> |
|-------|------|--------------------------|
| 1     | 2.0  | 95                       |
| 2     | 5.0  | 95                       |
| 3     | 1.0  | 94                       |
| 4     | 0.5  | 77                       |
| 5     | 0.1  | 41                       |
| 11    | 0.01 | < 5                      |

<sup>a</sup>Reaction conditions: **1** (0.2 mmol), styrene (0.4 mmol), **4** (0.5%), **3** (x mol%), anhydrous DMSO (1.0 mL), 34 W Kessil blue LED. <sup>b</sup>Trimethoxylbenzene was used as an internal standard.

#### 4. General Reaction Setup and Experimental Procedures

**Procedure C:** In a N<sub>2</sub>-filled glovebox, an oven-dried vial (0.5 dram) equipped with a magnet stir bar was charged with vinyl- or ethynylcyclopropane (0.2 mmol, 1.0 equiv.), appropriate alkene (2.0 equiv.), 50 uL stock solution of cinnamyl bromide **3** in DMSO (40 mM for 1.0 mol%; 80 mM for 2.0 mol%), anhydrous DMSO (1.90 mL for 0.1 M; 0.90 mL for 0.2 M; 0.40 mL for 0.4 M), and 50 uL stock solution of 4CzIPN **7** in DMSO (0.2 mM for 50 ppm; 2.0 mM for 500 ppm). The vial was then tightly capped and removed out of glovebox. The reaction was placed into a photoreactor (HeptatoChem HCK 1006-01-004) equipped with a blue LED (Kessil, 34 W). The reactor was cooling by air flow that the temperature was ~30 °C). After 12 h, the reaction mixture was diluted with water (10 mL) and extracted with ether (20 mL × 3). The combined organic phase was washed with H<sub>2</sub>O (20 mL × 3), brine (30 mL), dried over anhydrous Na<sub>2</sub>SO<sub>4</sub>, concentrated *in vacuo*. The residue was then subjected to silica gel chromatography for purification.

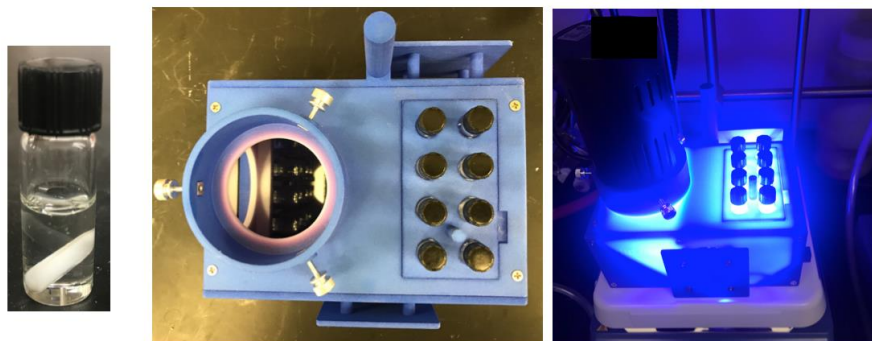

**Figure S2.** Reaction setup (HeptatoChem HCK 1006-01-004 with Kessil 34 W H-150 blue LED).

## 5. Mechanistic Study

### 5.1 TEMPO-trapping experiment

In a N<sub>2</sub>-filled glovebox, an oven-dried vial (0.5 dram) equipped with a magnet stir bar was charged with cinnamyl bromide **3** (39.4 mg, 0.2 mmol), TEMPO (93.8 mg, 0.6 mmol), anhydrous DMSO (1.0 mL) and 4CzIPN **7** (1.6 mg, 0.002 mmol). The vial was then tightly capped and removed out of glovebox. The reaction was placed into a photoreactor (HeptatoChem HCK 1006-01-004) equipped with a blue LED (Kessil, 34 W). The reactor was cooling by air flow that the temperature was ~30 °C). After 2 h, an aliquot of 10  $\mu$ L was taken for ESI-TOF LC/MS analysis. The reaction mixture was diluted with water (10 mL) and extracted with ether (20 mL  $\times$  3). The combined organic phase was washed with H<sub>2</sub>O (20.0 mL  $\times$  2), brine (30 mL), dried over anhydrous Na<sub>2</sub>SO<sub>4</sub>, concentrated *in vacuo*. 32.0 mg (81% yield) cinnamyl bromide was recovered through silica gel chromatography.

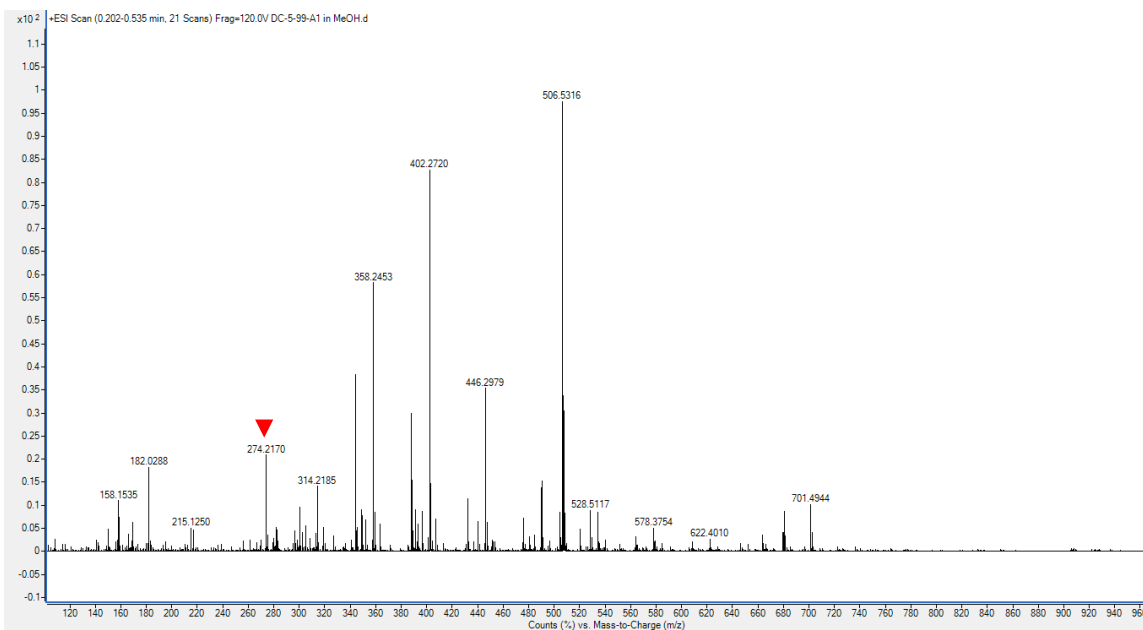

**Figure S3.** ESI-TOF LC/MS spectrum of aliquot taken from TEMPO-trapping experiment



## 5.2 Investigation of alternative precatalysts

In a N<sub>2</sub>-filled glovebox, an oven-dried vial (0.5 dram) equipped with a magnet stir bar was charged with vinylcyclopropane **1** (0.2 mmol, 1.0 equiv.), styrene (46.0 uL, 0.4 mmol), 50 uL stock solution of **7** in DMSO (0.2 mM), anhydrous DMSO (0.90 mL), and 50 uL stock solution of precatalyst in DMSO (40 mM). The vial was then tightly capped and removed out of glovebox. The reaction was placed into a photoreactor (HeptatoChem HCK 1006-01-004) equipped with a blue LED (Kessil, 34 W). The reactor was cooling by air flow that the temperature was ~30 °C). After 12 h, the vial was opened to the air and 1,3,5-trimethoxybenzene (16.8 mg, 0.1 mmol) was added as an internal standard. An aliquot of 0.10 mL was taken for direct <sup>1</sup>H NMR analysis to determine the yield.

**Table S4.** Results of [3+2] cycloaddition of **1** and styrene using alternative precatalyst.<sup>a</sup>

| Entry | precatalyst       | <b>7</b> | light | NMR Yield (%) <sup>b</sup> |
|-------|-------------------|----------|-------|----------------------------|
| 1     | allyl bromide     | √        | √     | 0                          |
| 2     | cinnamyl chloride | √        | √     | 0                          |
| 3     | NBS               | √        | √     | 41                         |
| 4     | NBS               | √        | ×     | 0                          |
| 5     | NBS               | ×        | √     | 0                          |
| 6     | NBS               | ×        | ×     | 0                          |
| 7     | Br <sub>2</sub>   | √        | √     | 26                         |
| 8     | Br <sub>2</sub>   | √        | ×     | 0                          |
| 9     | Br <sub>2</sub>   | ×        | √     | 16                         |
| 10    | Br <sub>2</sub>   | ×        | ×     | 0                          |

<sup>a</sup>Reaction conditions: **1** (0.2 mmol), styrene (0.4 mmol), **7** (50 ppm), precatalyst (1.0 %), anhydrous DMSO (1.0 mL), 34 W Kessil blue LED, 12h. <sup>b</sup>Trimethoxybenzene was used as an internal standard.

### 5.3 Radical epimerization experiment

In a N<sub>2</sub>-filled glovebox, an oven-dried vial (0.5 dram) equipped with a magnet stir bar was charged with *cis*-1-(ethoxycarbonyl)-2-vinylcyclopropane-1-carboxylic acid (36.8 mg, 0.2 mmol), 50  $\mu$ L stock solution of cinnamyl bromide **3** in DMSO (40 mM), anhydrous DMSO (0.90 mL), and 50  $\mu$ L stock solution of 4CzIPN **7** in DMSO (0.2 mM). The vial was then tightly capped and removed out of glovebox. The reaction was placed into a photoreactor (HeptatoChem HCK 1006-01-004) equipped with a blue LED (Kessil, 34W). The reactor was cooling by air flow that the temperature was  $\sim$ 30  $^{\circ}$ C). After 12 h, the reaction mixture was diluted with water (10 mL) and extracted with CH<sub>2</sub>Cl<sub>2</sub> (20 mL  $\times$  3). The combined organic phase was washed with brine (30.0 mL), dried over anhydrous Na<sub>2</sub>SO<sub>4</sub>, and concentrated *in vacuo*. Crude <sup>1</sup>H NMR was taken to determine the *cis*/*trans* ratio.

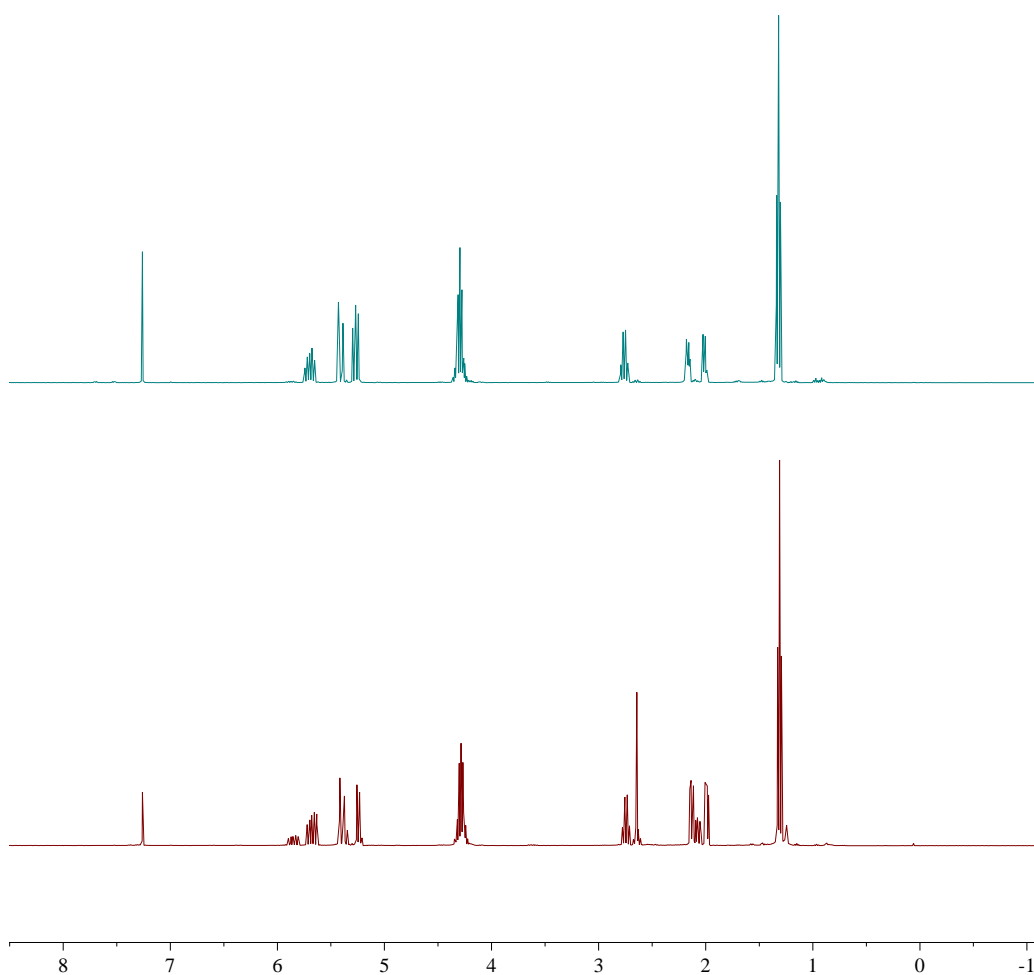

**Figure S4.** Comparison of <sup>1</sup>H NMR spectra before (teal, top) and after (bottom) radical epimerization

## 5.4 Cyclic voltammetry

Cyclic voltammetry (CV) was performed on an Interface 1010B Potentiostat (*Gamry Instruments*) with a scan rate of 0.10 V/s. A solution of Ag/AgNO<sub>3</sub> (0.01M) and 0.1 M Bu<sub>4</sub>NPF<sub>6</sub> in MeCN was used as the reference electrode (*Gamry Instruments*, part no. 930-00059). A 0.1 M Bu<sub>4</sub>NPF<sub>6</sub> in MeCN was used as the electrolyte for cinnamyl bromide solution (0.05M). A platinum disk was used for the working electrode (*Gamry Instruments*, part no. 932-00024) and a platinum wire was used as the counter electrode (*Gamry Instruments*, part no. 990-00193).

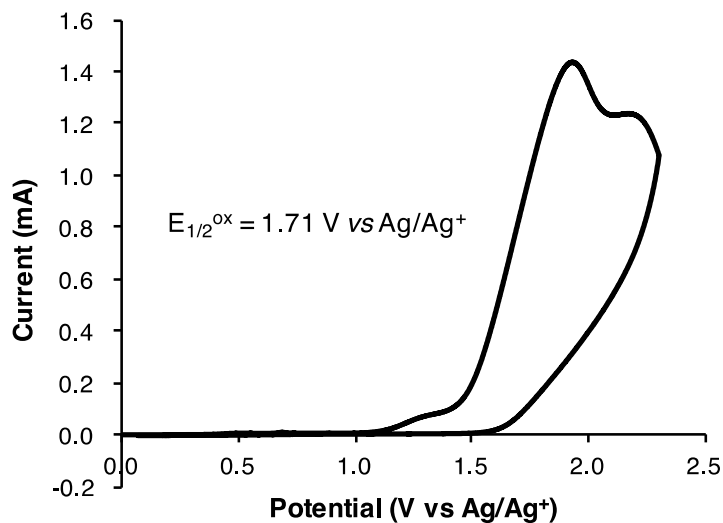

**Figure S5.** CV spectrum of cinnamyl bromide ( $E_{1/2}^{\text{ox}} = 1.71$  vs Ag/Ag<sup>+</sup> = 2.01 V vs SCE)

## 5.5 Stern-Volmer quenching experiment

Stern-Volmer experiments were operated on pectrofluorometer FS5 (*Edinburgh Instruments*) and with different solutions containing 10.0  $\mu\text{M}$  4CzIPN **7** in DMSO and  $x$  mM **3** ( $x = 1, 5, 10, 20, 40$ ), or vinylcyclopropane **1** ( $x = 10, 20, 30, 50$ ), or styrene ( $x = 10, 20, 30, 50$ ) in DMSO under irradiation at 380 nm. The luminescence was measured at 560 nm. Averaged data from three different runs were used for graphical representation.

**Table S5.** Luminescence quenching of 4CzIPN **7** at variable concentration of **3**

| <b>3a</b> (mM) | 0      | 1      | 5      | 10     | 20     | 40     |
|----------------|--------|--------|--------|--------|--------|--------|
| $I_0/I$        | 1.0000 | 1.0344 | 1.1250 | 1.2273 | 1.4040 | 1.6488 |

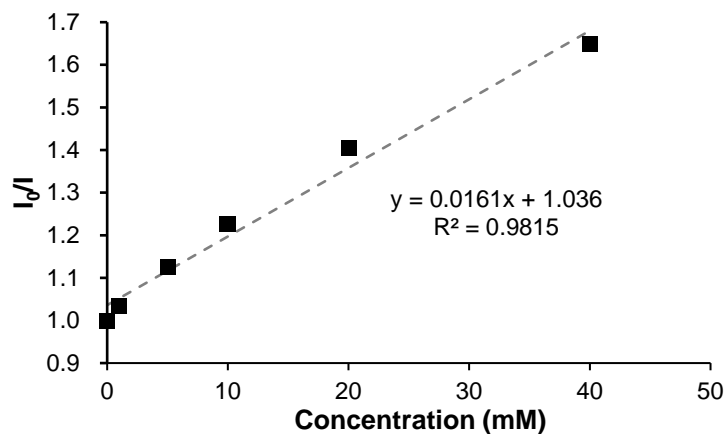

**Figure S6.** Stern-Volmer plots of 4CzIPN **7** at variable concentration of **3**.

**Table S6.** Luminescence quenching of 4CzIPN **7** at variable concentration of vinylcyclopropane **1**

| <b>1</b> (mM) | 0      | 10     | 20     | 30     | 50     |
|---------------|--------|--------|--------|--------|--------|
| $I_0/I$       | 1.0000 | 1.0076 | 1.0013 | 1.0036 | 0.9949 |

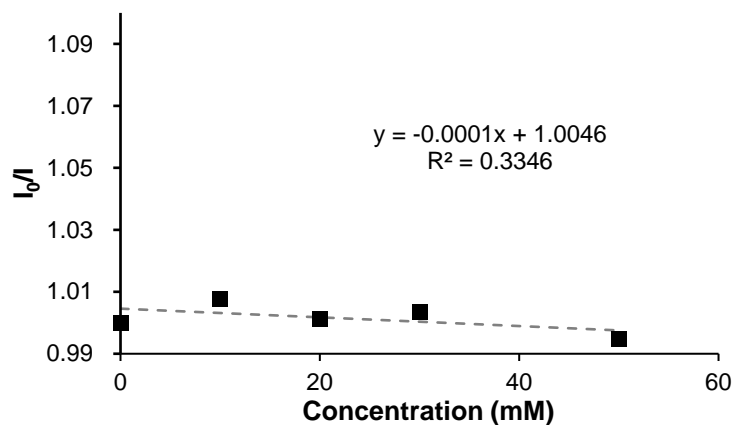

**Figure S7.** Stern-Volmer plots of 4CzIPN **7** at variable concentration of vinylcyclopropane **1**.

**Table S7.** Luminescence quenching of 4CzIPN 7 at variable concentration of styrene

| styrene (mM) | 0      | 10     | 20     | 30     | 50     |
|--------------|--------|--------|--------|--------|--------|
| $I_0/I$      | 1.0000 | 1.0076 | 1.0013 | 1.0036 | 0.9949 |

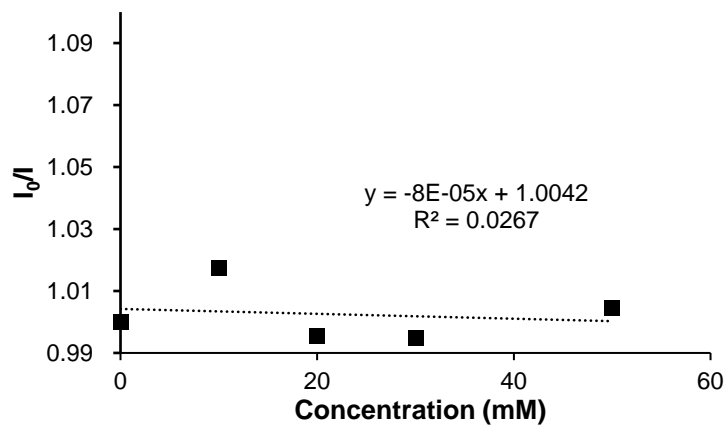

**Figure S8.** Stern-Volmer plots of 4CzIPN 7 at variable concentration of styrene.

## 5.6 “On/off” experiment

The reaction was set up in a N<sub>2</sub>-filled glovebox according to the **Procedure C**. The reaction mixture was irradiated for an hour. An aliquot of 0.10 mL was taken from the reaction mixture and injected into a vial containing 0.50 mL of CDCl<sub>3</sub> containing trimethoxybenzene (4.2 mg) as the internal standard. The yield of product was determined by crude <sup>1</sup>H NMR analysis. The reaction mixture was then wrapped by aluminum foil and re-subject to 34 W Kessil Blue LED. The yields later on were determined in the same way after some time light on or off.

**Table S8.** Results of “on/off” experiment

| Entry | Time (h) | NMR Yield (%) <sup>a</sup> |
|-------|----------|----------------------------|
| 1     | 0        | 0                          |
| 2     | 1        | 15                         |
| 3     | 2 (off)  | 15                         |
| 4     | 3        | 27                         |
| 5     | 4 (off)  | 27                         |
| 6     | 6        | 46                         |
| 7     | 7 (off)  | 46                         |
| 8     | 9        | 60                         |

<sup>a</sup>Trimethoxybenzene was used as an internal standard.

## 5.7 Determination of quantum yield ( $\Phi$ )

In a N<sub>2</sub>-filled glovebox, an oven-dried J-Young NMR tube equipped with a micro stir bar was charged with vinylcyclopropane **1** (18.4 mg, 0.10 mmol), styrene (23.0  $\mu$ L, 0.20 mmol), 25  $\mu$ L stock solution of cinnamyl bromide **3** in DMSO (40 mM), anhydrous DMSO (0.45 mL), and 25  $\mu$ L stock solution of 4CzIPN **7** in DMSO (0.2 mM). The sealed NMR tube was removed out of the glovebox and irradiated at 419 nm. After 8 h ( $t = 28800$  s), 8.0 mg trimethoxybenzene was added to the NMR tube. An aliquot (0.050 mL) was then taken and injected into a HPLC vial containing 0.55 mL of CDCl<sub>3</sub> for direct <sup>1</sup>H-NMR analysis. The NMR yield was determined to be 5.2% (Fig. S8).

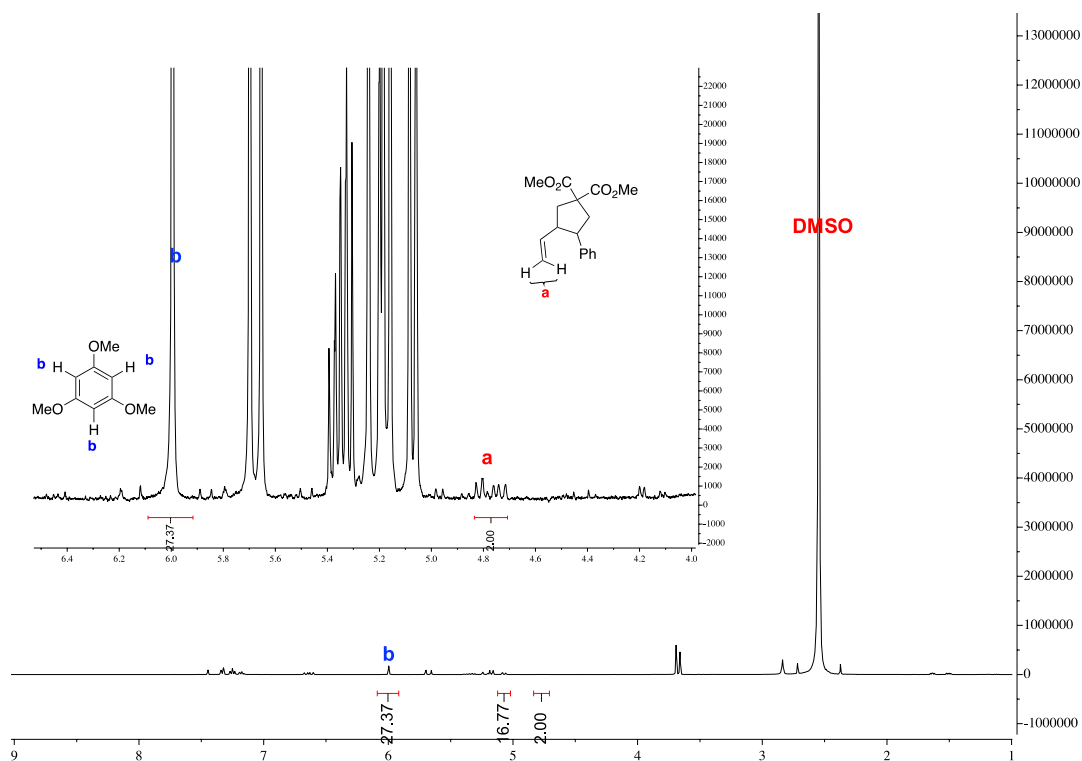

**Figure S9.** Crude <sup>1</sup>H NMR analysis.

The quantum yield ( $\Phi$ ) can be calculated by using the equation as shown below:

$$\Phi = \frac{\text{mol product}}{\text{photon flux} \cdot f \cdot t}$$

The photon flux at 419 nm for the aforementioned setup was previously determined to be  $5.2 \times 10^{-9}$  einstein/s.

Fraction of light absorbed ( $f$ ) was calculated by  $f = 1 - 10^{-A}$ .  $A$  is the absorbance of PC in a specific solvent and concentration. In this experiment, the concentration of 4CzIPN was 10  $\mu$ M.  $A$  was determined to be 0.09146 at 419 nm for a 10  $\mu$ M solution of 4CzIPN in DMSO (Fig. S10), therefore,  $f = 0.1899$ .

The quantum yield was calculated by:



$$\Phi = \frac{\text{mol product}}{\text{photon flux} \cdot f \cdot t}$$

$$= \frac{5.2\% \times 0.1/1000}{5.2 \times 10^{-9} \times 0.1899 \times 28800} = 18.3\%$$

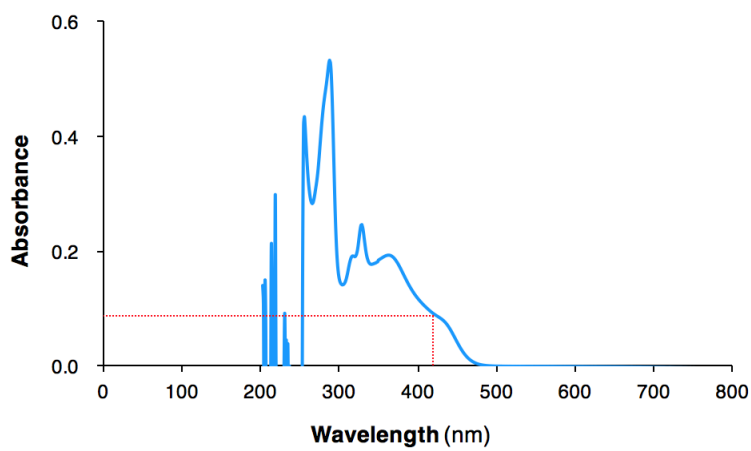

**Figure S10.** UV-Vis Spectrum of 4CZIPN in DMSO (10 uM)

## 6. Characterization of Products

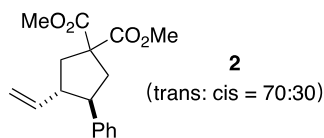

Prepared according to **Procedure C**. Colorless oil (50.4 mg, 88% yield) as a mixture of diastereomers (trans : cis = 70:30).  $R_f = 0.35$  (10% EtOAc in hexane).

**$^1\text{H NMR}$**  (400 MHz,  $\text{CDCl}_3$ )  $\delta$  7.27 – 6.95 (m, 5H), 5.57 (ddd,  $J = 16.8, 10.8, 7.0$  Hz, 0.30H), 5.29 (ddd,  $J = 17.1, 10.3, 8.0$  Hz, 0.70H), 4.90 – 4.58 (m, 2.0H), 3.80 – 3.55 (m, 6.0H), 3.37 (dt,  $J = 10.7, 7.5$  Hz, 0.70H), 2.94 (p,  $J = 7.3$  Hz, 0.70H), 2.84 – 2.43 (m, 3.30H), 2.38 – 2.21 (m, 1.0H), 2.15 – 2.03 (m, 0.30H).

**$^{13}\text{C NMR}$**  (101 MHz,  $\text{CDCl}_3$ )  $\delta$  173.1, 173.0, 172.9, 172.7, 141.5, 140.8, 138.7, 138.2, 128.4, 128.3, 128.1, 127.6, 126.6, 126.3, 115.6, 115.4, 59.0, 58.1, 52.9, 52.8, 51.5, 50.9, 48.0, 47.3, 42.5, 40.3, 39.0, 38.1.

**DART-TOF LC/MS**  $m/z$  calcd. for  $\text{C}_{17}\text{H}_{21}\text{O}_4$  [ $\text{M}+\text{H}^+$ ] 289.1440, found 289.1442.

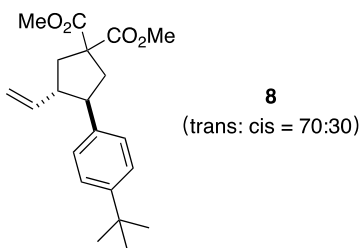

Prepared according to **Procedure C**. Colorless oil (60.1 mg, 87% yield) as a mixture of diastereomers (trans : cis = 70:30).  $R_f = 0.45$  (10% EtOAc in hexane).

**$^1\text{H NMR}$**  (400 MHz,  $\text{CDCl}_3$ )  $\delta$  7.34 – 7.25 (m, 2.0H), 7.15 (d,  $J = 8.3$  Hz, 0.60H), 7.08 (d,  $J = 8.3$  Hz, 1.40H), 5.73 – 5.60 (m, 0.30H), 5.39 (ddd,  $J = 17.1, 10.3, 7.9$  Hz, 0.70H), 4.99 – 4.80 (m, 2.0H), 3.82 – 3.70 (m, 6.0H), 3.41 (dt,  $J = 10.5, 7.4$  Hz, 0.70H), 3.05 – 2.96 (m, 0.70H), 2.92 – 2.52 (m, 3.30H), 2.46 – 2.27 (m, 1.0H), 2.21 – 2.11 (m, 0.30H).

**$^{13}\text{C NMR}$**  (101 MHz,  $\text{CDCl}_3$ )  $\delta$  173.2, 173.0, 173.0, 172.7, 149.3, 149.0, 139.0, 138.4, 138.3, 137.6, 128.0, 127.2, 125.3, 124.9, 115.5, 115.3, 59.0, 58.1, 52.9, 52.8, 50.8, 50.4, 47.6, 47.2, 42.6, 40.3, 38.9, 38.2, 34.4, 34.4, 31.4.

**DART-TOF LC/MS**  $m/z$  calcd. for  $\text{C}_{21}\text{H}_{29}\text{O}_4$  [ $\text{M}+\text{H}^+$ ] 345.2066, found 345.2067.

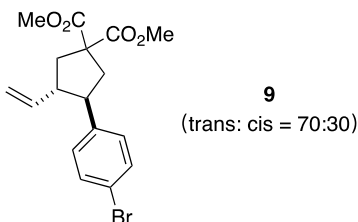

Prepared according to **Procedure C**. Colorless oil (67.3 mg, 92% yield) as a mixture of diastereomers (trans : cis = 70:30).  $R_f = 0.40$  (10% EtOAc in hexane).

**<sup>1</sup>H NMR** (400 MHz, CDCl<sub>3</sub>) δ 7.39 (dd, *J* = 8.4, 6.5 Hz, 2.0H), 7.09 (d, *J* = 8.5 Hz, 0.60H), 7.04 – 6.98 (m, 1.40H), 5.60 (ddd, *J* = 17.3, 10.3, 7.1 Hz, 0.30H), 5.33 (ddd, *J* = 17.1, 10.3, 8.1 Hz, 0.70H), 4.94 – 4.79 (m, 2.0H), 3.90 – 3.70 (m, 6.0H), 3.39 (dt, *J* = 10.7, 7.5 Hz, 0.70H), 3.04 – 2.93 (m, 0.70H), 2.87 – 2.47 (m, 3.30H), 2.40 – 2.26 (m, 1.0H), 2.22 – 2.09 (m, 0.30H).

**<sup>13</sup>C NMR** (101 MHz, CDCl<sub>3</sub>) δ 173.0, 172.9, 172.8, 172.6, 140.6, 139.8, 138.3, 137.8, 131.5, 131.1, 130.1, 129.4, 120.3, 120.1, 116.0, 115.8, 58.9, 58.1, 53.0, 52.9, 52.9, 52.8, 51.0, 50.9, 47.5, 47.3, 42.2, 40.3, 39.0, 38.1.

**DART-TOF LC/MS** *m/z* calcd. for C<sub>17</sub>H<sub>19</sub>BrO<sub>4</sub> [M+H<sup>+</sup>] 367.0545, found 367.0541.

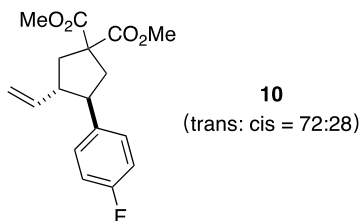

Prepared according to **Procedure C**. Colorless oil (52.7 mg, 86% yield) as a mixture of diastereomers (trans : cis = 72:28). *R<sub>f</sub>* = 0.35 (10% EtOAc in hexane).

**<sup>1</sup>H NMR** (400 MHz, CDCl<sub>3</sub>) δ 7.21 – 6.90 (m, 4.0H), 5.59 (d, *J* = 17.3 Hz, 0.28H), 5.34 (ddd, *J* = 17.1, 10.3, 8.1 Hz, 0.72H), 4.94 – 4.77 (m, 2.0H), 3.90 – 3.65 (m, 6.0H), 3.41 (dt, *J* = 10.8, 7.5 Hz, 0.72H), 3.05 – 2.93 (m, 0.72H), 2.89 – 2.47 (m, 2.28H), 2.40 – 2.26 (m, 1.0H), 2.22 – 2.10 (m, 0.28H).

**<sup>13</sup>C NMR** (101 MHz, CDCl<sub>3</sub>) δ 173.0, 172.9, 172.8, 172.6, 162.8, 162.6, 160.4, 160.2, 138.5, 138.0, 137.2, 137.1, 136.4, 136.4, 129.7, 129.6, 129.0, 128.9, 115.8, 115.6, 115.3, 115.1, 114.9, 114.7, 58.9, 58.0, 52.9, 52.8, 52.8, 51.1, 50.7, 47.4, 47.3, 42.4, 40.2, 38.9, 38.3.

**<sup>19</sup>F NMR** (376 MHz, CDCl<sub>3</sub>) δ -116.6, -117.0.

**DART-TOF LC/MS** *m/z* calcd. for C<sub>17</sub>H<sub>19</sub>FO<sub>4</sub> [M+H<sup>+</sup>] 307.1346, found 307.1349.

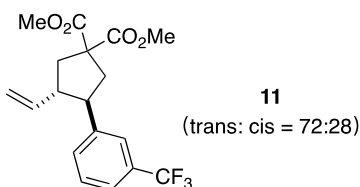

Prepared according to **Procedure C**. Colorless oil (49.6 mg, 70% yield) as a mixture of diastereomers (trans : cis = 72:28). *R<sub>f</sub>* = 0.40 (10% EtOAc in hexane).

**<sup>1</sup>H NMR** (400 MHz, CDCl<sub>3</sub>) δ 7.49 – 7.30 (m, 4H), 5.62 (ddd, *J* = 17.4, 10.4, 7.2 Hz, 0.28H), 5.32 (ddd, *J* = 17.1, 10.3, 8.2 Hz, 0.72H), 4.96 – 4.76 (m, 2.0H), 3.90 – 3.65 (m, 6.0H), 3.55 – 3.42 (m, 0.72H), 3.17 – 3.00 (m, 0.72H), 2.98 – 2.86 (m, 0.28H), 2.85 – 2.52 (m, 3.0H), 2.45 – 2.30 (m, 1.0H), 2.25 – 2.12 (m, 0.28H).

**<sup>13</sup>C NMR** (101 MHz, CDCl<sub>3</sub>) δ 172.9, 172.8, 172.7, 172.5, 142.6, 141.7, 138.2, 137.5, 131.7, 131.7, 131.7, 131.0, 130.9, 130.8, 130.5, 130.5, 130.2, 129.9, 128.8, 128.5, 125.6, 125.1, 125.1, 125.0, 125.0, 124.4, 124.4, 124.3, 123.5, 123.4, 123.4, 123.2, 123.2, 123.1,

123.1, 122.9, 116.2, 116.1, 58.9, 58.1, 53.0, 52.9, 52.8, 51.1, 51.0, 47.9, 47.3, 42.2, 40.3, 38.9, 37.9.

$^{19}\text{F}$  NMR (376 MHz,  $\text{CDCl}_3$ )  $\delta$  -62.60, -62.61.

**DART-TOF LC/MS**  $m/z$  calcd. for  $\text{C}_{18}\text{H}_{19}\text{F}_3\text{O}_4$   $[\text{M}+\text{H}^+]$  357.1314, found 357.1314.

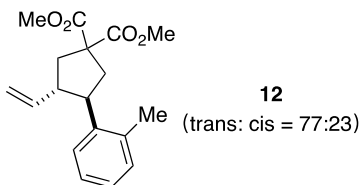

Prepared according to **Procedure C**. Colorless oil (53.9 mg, 89% yield) as a mixture of diastereomers (trans : cis = 72:28).  $R_f$  = 0.40 (10% EtOAc in hexane).

$^1\text{H}$  NMR (400 MHz,  $\text{CDCl}_3$ )  $\delta$  7.24 – 7.06 (m, 4.0H), 5.63 (ddd,  $J$  = 17.4, 10.4, 7.2 Hz, 0.23H), 5.31 (ddd,  $J$  = 17.0, 10.3, 8.3 Hz, 0.77H), 4.97 – 4.70 (m, 2.0H), 3.83 – 3.72 (m, 6.0H), 3.58 (ddd,  $J$  = 11.0, 8.3, 7.1 Hz, 0.77H), 3.23 – 3.03 (m, 1.0H), 2.95 – 2.55 (m, 3.0H), 2.39 – 2.27 (m, 3.77H), 2.13 (ddd,  $J$  = 13.8, 11.3, 2.4 Hz, 0.46H).

$^{13}\text{C}$  NMR (101 MHz,  $\text{CDCl}_3$ )  $\delta$  173.1, 173.0, 173.0, 172.7, 139.6, 138.6, 138.5, 138.3, 136.5, 136.4, 130.2, 130.1, 126.7, 126.3, 126.2, 126.1, 125.7, 125.6, 115.6, 114.9, 58.8, 58.0, 52.9, 52.8, 50.0, 46.6, 45.0, 43.9, 42.1, 40.0, 39.1, 38.1, 20.1, 19.8.

**DART-TOF LC/MS**  $m/z$  calcd. for  $\text{C}_{18}\text{H}_{23}\text{O}_4$   $[\text{M}+\text{H}^+]$  303.1596, found 303.1595.

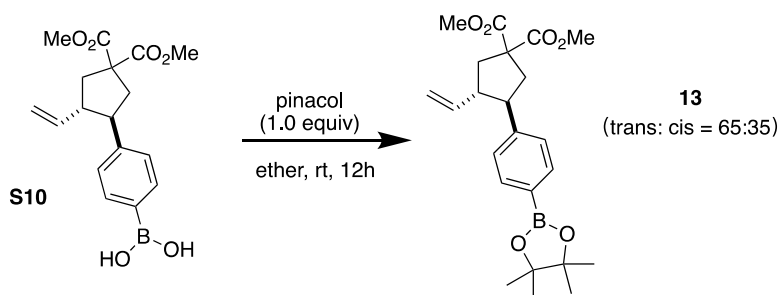

The boric acid product **S10** was prepared according to **Procedure C**. To a solution of crude **S10** in anhydrous ether (10.0 mL), pinacol (23.6 mg, 0.2 mmol, 1.0 equiv) was added. The reaction was stirred at room temperature for 12h. The solvent was then removed under vacuum, and the residue was purified by silica gel chromatography to give **13** as a colorless oil (69.7 mg, 84% yield, trans : cis = 65:35).  $R_f$  = 0.45 (10% EtOAc in hexane).

$^1\text{H}$  NMR (400 MHz,  $\text{CDCl}_3$ )  $\delta$  7.78 – 7.66 (m, 2.0H), 7.24 – 7.20 (m, 0.70H), 7.17 – 7.12 (m, 1.30H), 5.62 (ddd,  $J$  = 16.7, 10.7, 7.1 Hz, 0.35H), 5.34 (ddd,  $J$  = 17.1, 10.3, 8.0 Hz, 0.65H), 4.92 – 4.74 (m, 2.0H), 3.95 – 3.65 (m, 6.0H), 3.50 – 3.40 (m, 0.65H), 3.10 – 2.98 (m, 0.65H), 2.88 (td,  $J$  = 11.1, 7.6 Hz, 0.35H), 2.81 – 2.53 (m, 3.0H), 2.44 – 2.30 (m, 1.0H), 2.22 – 2.12 (m, 0.35H), 1.32 (s, 12.0H).

$^{13}\text{C}$  NMR (101 MHz,  $\text{CDCl}_3$ )  $\delta$  173.1, 172.9, 172.8, 172.6, 144.8, 144.0, 138.6, 138.0, 134.9, 134.6, 127.8, 127.1, 115.7, 115.5, 83.7, 59.0, 58.1, 52.9, 52.8, 52.8, 51.7, 50.9, 48.2, 47.3, 42.3, 40.3, 39.0, 37.9, 24.9, 24.9, 24.8.

**DART-TOF LC/MS**  $m/z$  calcd. for  $\text{C}_{23}\text{H}_{32}\text{BO}_6$   $[\text{M}+\text{H}^+]$  415.2292, found 415.2292.

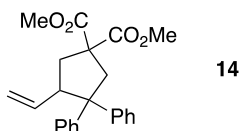

Prepared according to **Procedure C**. Colorless oil (70.1 mg, 96% yield).  $R_f = 0.40$  (10% EtOAc in hexane).

**$^1\text{H NMR}$**  (400 MHz,  $\text{CDCl}_3$ )  $\delta$  7.36 – 6.75 (m, 10H), 5.37 (ddd,  $J = 17.1, 10.3, 8.1$  Hz, 1H), 5.03 (dd,  $J = 17.2, 1.4$  Hz, 1H), 4.92 – 4.81 (m, 1H), 3.69 (s, 3H), 3.56 (dd,  $J = 8.6, 6.4$  Hz, 1H), 3.47 (s, 3H), 3.44 (d,  $J = 14.7$  Hz, 1H), 2.89 (d,  $J = 14.7$  Hz, 1H), 2.59 (dd,  $J = 13.8, 6.4$  Hz, 1H), 2.14 (dd,  $J = 13.8, 9.2$  Hz, 1H).

**$^{13}\text{C NMR}$**  (101 MHz,  $\text{CDCl}_3$ )  $\delta$  172.7, 172.6, 148.2, 144.9, 138.5, 129.0, 128.1, 127.6, 127.4, 126.1, 126.0, 116.1, 58.1, 57.8, 53.0, 52.8, 50.2, 46.5, 38.7.

**DART-TOF LC/MS**  $m/z$  calcd. for  $\text{C}_{23}\text{H}_{25}\text{O}_4$   $[\text{M}+\text{H}]^+$  365.1753, found 365.1758.

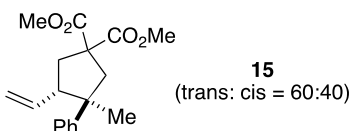

Prepared according to **Procedure C**. Colorless oil (50.0 mg, 83% yield) as a mixture of diastereomers (trans : cis = 60:40).  $R_f = 0.40$  (10% EtOAc in hexane).

**$^1\text{H NMR}$**  (400 MHz,  $\text{CDCl}_3$ )  $\delta$  7.39 – 7.01 (m, 5.0H), 5.64 (ddd,  $J = 17.4, 10.5, 7.0$  Hz, 0.60H), 5.11 (ddd,  $J = 17.1, 10.1, 8.5$  Hz, 0.40H), 4.99 – 4.72 (m, 2.0H), 3.75 – 3.61 (m, 6.0H), 3.04 – 2.89 (m, 1.0H), 2.72 – 2.58 (m, 1.0H), 2.58 – 2.33 (m, 2.60H), 2.22 (dd,  $J = 13.8, 8.6$  Hz, 0.40H), 1.33 (s, 1.20H), 1.14 (d,  $J = 0.8$  Hz, 1.80H).

**$^{13}\text{C NMR}$**  (101 MHz,  $\text{CDCl}_3$ )  $\delta$  173.4, 173.4, 173.0, 172.8, 147.7, 146.0, 138.6, 136.6, 128.2, 127.8, 127.3, 126.1, 126.0, 125.8, 116.5, 115.6, 58.7, 57.5, 55.0, 53.0, 53.0, 52.9, 52.9, 52.8, 49.9, 49.5, 48.8, 45.8, 39.2, 38.3, 29.4, 21.8.

**DART-TOF LC/MS**  $m/z$  calcd. for  $\text{C}_{18}\text{H}_{23}\text{O}_4$   $[\text{M}+\text{H}^+]$  303.1596, found 303.1602.

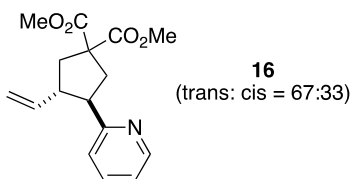

Prepared according to **Procedure C**. Colorless oil (30.2 mg, 52% yield) as a mixture of diastereomers (trans : cis = 67:33).  $R_f = 0.25$  (30% EtOAc in hexane).

**$^1\text{H NMR}$**  (400 MHz,  $\text{CDCl}_3$ )  $\delta$  8.58 – 8.44 (m, 1.0H), 7.63 – 7.48 (m, 1.0H), 7.17 – 7.01 (m, 2.0H), 5.67 (ddd,  $J = 17.1, 10.4, 7.5$  Hz, 0.33H), 5.33 (ddd,  $J = 17.1, 10.2, 8.3$  Hz, 0.67H), 4.94 – 4.69 (m, 2.0H), 3.85 – 3.69 (m, 6.0H), 3.56 (dd,  $J = 8.0, 7.9$  Hz, 0.67H), 3.18 – 2.68 (m, 3.33H), 2.62 – 2.43 (m, 1.67H), 2.13 (dd,  $J = 13.7, 10.7$  Hz, 0.33H).

**$^{13}\text{C NMR}$**  (101 MHz,  $\text{CDCl}_3$ )  $\delta$  173.5, 173.1, 172.6, 172.6, 160.8, 160.8, 149.4, 148.9, 138.9, 138.1, 136.2, 135.7, 123.3, 123.0, 121.7, 121.3, 115.5, 115.4, 59.6, 58.4, 53.3, 52.9, 52.8, 52.8, 52.7, 50.3, 50.2, 47.7, 40.9, 40.1, 39.1, 37.8.

**DART-TOF LC/MS**  $m/z$  calcd. for  $\text{C}_{16}\text{H}_{20}\text{NO}_4$   $[\text{M}+\text{H}^+]$  290.1392, found 290.1393.

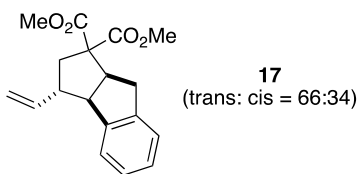

Prepared according to **Procedure C**. Colorless oil (54.8 mg, 91% yield) as a mixture of diastereomers (trans : cis = 66:34).  $R_f = 0.40$  (10% EtOAc in hexane).

**$^1\text{H NMR}$**  (400 MHz,  $\text{CDCl}_3$ )  $\delta$  7.20 – 7.05 (m, 4.0H), 5.95 – 5.79 (m, 0.34H), 5.35 (ddd,  $J = 17.1, 10.1, 8.6$  Hz, 0.66H), 5.12 – 4.88 (m, 2.0H), 4.01 – 3.71 (m, 6.68H), 3.66 (s, 1.0H), 3.49 (dd,  $J = 8.5, 7.1$  Hz, 0.34H), 3.08 (ddd,  $J = 16.7, 9.7, 7.9$  Hz, 1.0H), 2.91 – 2.72 (m, 1.66H), 2.67 – 2.55 (m, 0.66H), 2.28 – 1.94 (m, 1.66H).

**$^{13}\text{C NMR}$**  (101 MHz,  $\text{CDCl}_3$ )  $\delta$  172.8, 172.3, 171.2, 170.8, 145.2, 142.7, 142.0, 141.7, 140.6, 138.9, 126.9, 126.9, 126.8, 126.7, 125.9, 124.4, 124.1, 123.8, 115.2, 114.7, 64.1, 62.9, 56.5, 52.9, 52.9, 52.7, 52.5, 52.3, 50.2, 50.0, 47.8, 45.5, 41.8, 37.9, 35.9, 34.9.

**DART-TOF LC/MS**  $m/z$  calcd. for  $\text{C}_{18}\text{H}_{21}\text{O}_4$  [ $\text{M}+\text{H}^+$ ] 301.1440, found 301.1442.

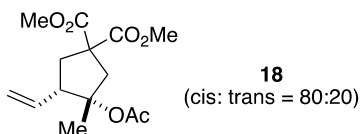

Prepared according to **Procedure C**. Colorless oil (19.0 mg, 32% yield) as a mixture of diastereomers (cis : trans = 80:20).  $R_f = 0.35$  (30% EtOAc in hexane).

**$^1\text{H NMR}$**  (400 MHz,  $\text{CDCl}_3$ )  $\delta$  5.87 – 5.60 (m, 1.0H), 5.17 – 5.05 (m, 2.0H), 3.93 – 3.52 (m, 6.0H), 3.40 (d,  $J = 15.4$  Hz, 0.20H), 2.99 – 2.87 (m, 0.80H), 2.83 – 2.57 (m, 2.40H), 2.52 – 2.18 (m, 0.80H), 2.04 (dd,  $J = 14.0, 9.4$  Hz, 0.80H), 1.95 (s, 2.40H), 1.92 (s, 0.60H), 1.52 (s, 0.60H), 1.37 (s, 2.40H).

**$^{13}\text{C NMR}$**  (101 MHz,  $\text{CDCl}_3$ )  $\delta$  173.0, 172.4, 172.4, 172.3, 170.5, 170.3, 136.0, 134.9, 118.1, 117.1, 89.2, 88.6, 57.3, 57.1, 55.5, 52.9, 52.8, 52.7, 51.9, 45.1, 43.5, 38.2, 36.0, 22.0, 22.0, 21.2, 20.0.

**DART-TOF LC/MS**  $m/z$  calcd. for  $\text{C}_{14}\text{H}_{24}\text{NO}_6$  [ $\text{M}+\text{NH}_4^+$ ] 302.1604, found 302.1604.

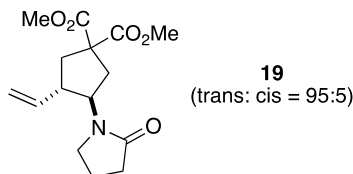

Prepared according to **Procedure C**. Colorless oil (45.4 mg, 77% yield) as a mixture of diastereomers (trans : cis = 95:5).  $R_f = 0.30$  (50% EtOAc in hexane).

**$^1\text{H NMR}$**  (400 MHz,  $\text{CDCl}_3$ )  $\delta$  5.77 – 5.62 (m, 1H), 5.07 – 4.91 (m, 2H), 4.59 (q,  $J = 8.0$  Hz, 1H), 3.68 (d,  $J = 6.3$  Hz, 6H), 3.32 (dt,  $J = 9.3, 7.0$  Hz, 1H), 3.24 (dt,  $J = 9.3, 6.8$  Hz, 1H), 2.90 (dddd,  $J = 9.7, 6.9, 2.8, 1.5$  Hz, 1H), 2.60 (ddd,  $J = 14.4, 8.1, 1.0$  Hz, 1H), 2.49 (ddd,  $J = 13.8, 7.1, 0.9$  Hz, 1H), 2.36 – 2.23 (m, 3H), 2.16 (dd,  $J = 13.7, 9.6$  Hz, 1H), 1.93 – 1.78 (m, 2H).

$^{13}\text{C}$  NMR (101 MHz,  $\text{CDCl}_3$ )  $\delta$  175.2, 172.1, 172.0, 136.0, 116.5, 58.2, 53.7, 53.0, 52.9, 45.7, 45.3, 37.7, 35.5, 31.1, 18.3.

**DART-TOF LC/MS**  $m/z$  calcd. for  $\text{C}_{15}\text{H}_{23}\text{NO}_5$   $[\text{M}+\text{H}]^+$  296.1498, found 296.1495.

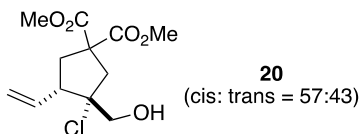

Prepared according to **Procedure C**. Colorless oil (28.3 mg, 51% yield) as a mixture of diastereomers (cis : trans = 57:43).  $R_f$  = 0.35 (50% EtOAc in hexane).

$^1\text{H}$  NMR (400 MHz,  $\text{CDCl}_3$ )  $\delta$  5.82 – 5.66 (m, 1.0H), 5.23 – 5.00 (m, 2.0H), 3.79 – 3.48 (m, 8.0H), 3.14 – 2.53 (m, 4.0H), 2.38 (dd,  $J$  = 13.5, 7.0 Hz, 0.43H), 2.22 – 2.06 (m, 1.57H).

$^{13}\text{C}$  NMR (101 MHz,  $\text{CDCl}_3$ )  $\delta$  172.7, 172.5, 171.9, 171.6, 135.4, 134.2, 118.6, 118.2, 77.4, 77.0, 76.7, 67.8, 67.0, 57.4, 57.0, 54.9, 53.2, 53.2, 53.1, 53.0, 50.6, 46.5, 44.9, 38.2, 37.6.

**DART-TOF LC/MS**  $m/z$  calcd. for  $\text{C}_{12}\text{H}_{18}\text{ClO}_5$   $[\text{M}+\text{H}^+]$  277.0843, found 277.0846.

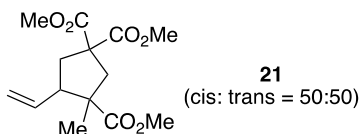

Prepared according to **Procedure C**. Colorless oil (48.6 mg, 85% yield) as a mixture of diastereomers (cis : trans = 50:50).  $R_f$  = 0.40 (20% EtOAc in hexane).

$^1\text{H}$  NMR (400 MHz,  $\text{CDCl}_3$ )  $\delta$  5.85 – 5.66 (m, 0.50H), 5.66 – 5.55 (m, 0.50H), 5.12 – 4.94 (m, 2H), 3.82 – 3.48 (m, 9.0H), 3.12 – 2.98 (m, 0.50H), 2.91 (d,  $J$  = 14.4 Hz, 0.50H), 2.82 (d,  $J$  = 14.3 Hz, 0.50H), 2.57 – 2.44 (m, 1.50H), 2.40 – 2.29 (m, 1.0H), 2.28 – 2.11 (m, 1.0H), 1.26 (s, 1.50H), 1.07 (s, 1.50H).

$^{13}\text{C}$  NMR (101 MHz,  $\text{CDCl}_3$ )  $\delta$  176.5, 175.6, 173.5, 172.5, 172.1, 136.0, 135.7, 117.1, 116.8, 58.7, 57.8, 54.6, 53.0, 53.0, 52.9, 52.9, 52.7, 52.1, 51.9, 51.5, 49.7, 44.8, 44.7, 38.9, 37.5, 22.7, 18.9.

**DART-TOF LC/MS**  $m/z$  calcd. for  $\text{C}_{14}\text{H}_{21}\text{O}_6$   $[\text{M}+\text{H}^+]$  285.1338, found 285.1334.

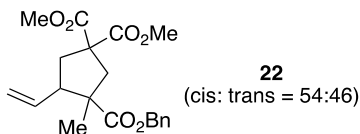

Prepared according to **Procedure C**. Colorless oil (64.7 mg, 90% yield) as a mixture of diastereomers (cis : trans = 54:46).  $R_f$  = 0.40 (50% EtOAc in hexane).

$^1\text{H}$  NMR (400 MHz,  $\text{CDCl}_3$ )  $\delta$  7.39 – 7.28 (m, 5H), 5.74 (ddd,  $J$  = 17.4, 10.5, 7.2 Hz, 0.46H), 5.65 – 5.53 (m, 0.54H), 5.16 – 4.94 (m, 4.0H), 3.81 – 3.55 (m, 6.0H), 3.15 – 3.04 (m, 0.46H), 2.94 (dd,  $J$  = 32.8, 14.4 Hz, 1.0H), 2.62 – 2.48 (m, 1.54H), 2.44 – 2.14 (m, 2.0H), 1.32 (s, 1.62H), 1.13 (s, 1.38H).

$^{13}\text{C}$  NMR (101 MHz,  $\text{CDCl}_3$ )  $\delta$  175.9, 175.1, 173.5, 172.5, 172.4, 171.9, 135.9, 135.8, 135.6, 128.5, 128.5, 128.4, 128.2, 128.1, 127.9, 117.2, 117.0, 66.6, 66.4, 58.7, 57.9, 54.7, 53.0, 53.0, 52.9, 52.7, 51.9, 49.8, 44.8, 44.7, 38.9, 37.6, 22.9, 19.1.

**DART-TOF LC/MS**  $m/z$  calcd. for  $\text{C}_{20}\text{H}_{25}\text{O}_6$   $[\text{M}+\text{H}^+]$  361.1651, found 361.1652.

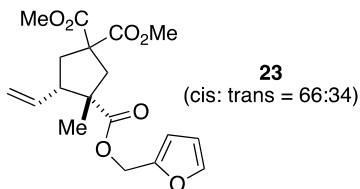

Prepared according to **Procedure C**. Colorless oil (59.6 mg, 85% yield) as a mixture of diastereomers (cis : trans = 66:34).  $R_f$  = 0.40 (20% EtOAc in hexane).

$^1\text{H}$  NMR (400 MHz,  $\text{CDCl}_3$ )  $\delta$  7.39 (dd,  $J$  = 1.9, 0.8 Hz, 1.0H), 6.39 – 6.29 (m, 2.0H), 5.70 (ddd,  $J$  = 17.4, 10.5, 7.2 Hz, 0.34H), 5.60 – 5.48 (m, 0.66H), 5.10 – 4.91 (m, 4.0H), 3.70 (dd,  $J$  = 8.2, 1.9 Hz, 6.0H), 3.10 – 3.00 (m, 0.34H), 2.95 (d,  $J$  = 14.4 Hz, 0.66H), 2.84 (d,  $J$  = 14.3 Hz, 0.34H), 2.60 – 2.44 (m, 1.66H), 2.39 – 2.30 (m, 1.0H), 2.27 – 2.12 (m, 1.0H), 1.27 (s, 1.98H), 1.08 (s, 1.02H).

$^{13}\text{C}$  NMR (101 MHz,  $\text{CDCl}_3$ )  $\delta$  175.7, 174.8, 173.5, 172.4, 172.4, 171.9, 149.5, 149.4, 143.1, 143.0, 135.8, 135.5, 117.1, 117.0, 110.6, 110.5, 110.4, 58.7, 58.4, 58.0, 57.9, 54.7, 53.0, 53.0, 52.9, 52.7, 52.0, 49.8, 44.7, 44.6, 38.9, 37.5, 22.8, 18.9.

**DART-TOF LC/MS**  $m/z$  calcd. for  $\text{C}_{18}\text{H}_{23}\text{O}_7$   $[\text{M}+\text{H}^+]$  351.1444, found 351.1449.

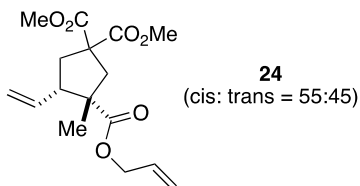

Prepared according to **Procedure C**. Colorless oil (50.7 mg, 82% yield) as a mixture of diastereomers (cis : trans = 55:45).  $R_f$  = 0.45 (20% EtOAc in hexane).

$^1\text{H}$  NMR (400 MHz,  $\text{CDCl}_3$ )  $\delta$  6.12 – 5.48 (m, 1.0H), 5.40 – 4.94 (m, 4.0H), 4.59 – 4.45 (m, 2.0H), 3.78 – 3.63 (m, 6.0H), 3.14 – 3.02 (m, 0.45H), 2.94 (d,  $J$  = 14.4 Hz, 0.55H), 2.86 (d,  $J$  = 14.3 Hz, 0.45H), 2.61 – 2.46 (m, 1.55H), 2.42 – 2.30 (m, 1.0H), 2.29 – 2.11 (m, 1.0H), 1.29 (s, 1.65H), 1.10 (s, 1.35H).

$^{13}\text{C}$  NMR (101 MHz,  $\text{CDCl}_3$ )  $\delta$  175.7, 174.8, 173.5, 172.4, 172.4, 172.0, 136.0, 135.7, 132.1, 118.2, 118.0, 117.2, 116.9, 65.4, 65.2, 58.7, 57.9, 54.6, 53.0, 52.9, 52.9, 52.7, 51.9, 49.7, 44.8, 44.7, 39.0, 37.5, 22.8, 19.0.

**DART-TOF LC/MS**  $m/z$  calcd. for  $\text{C}_{16}\text{H}_{23}\text{O}_6$   $[\text{M}+\text{H}^+]$  311.1495, found 311.1491.

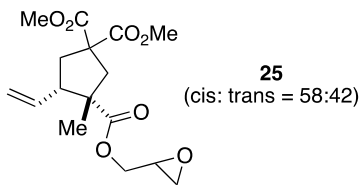



Prepared according to **Procedure C**. Colorless oil (58.6 mg, 90% yield) as a mixture of diastereomers (cis : trans = 58:42).  $R_f = 0.30$  (20% EtOAc in hexane).

$^1\text{H NMR}$  (400 MHz,  $\text{CDCl}_3$ )  $\delta$  5.81 – 5.55 (m, 1.0H), 5.13 – 4.99 (m, 2.0H), 4.39 (ddd,  $J = 12.3, 4.6, 3.0$  Hz, 0.42H), 4.31 (dd,  $J = 12.2, 3.1$  Hz, 0.58H), 3.90 (ddd,  $J = 12.3, 6.1, 1.5$  Hz, 0.42H), 3.81 (ddd,  $J = 12.3, 6.4, 0.9$  Hz, 0.58H), 3.74 – 3.67 (m, 6.0H), 3.21 – 2.73 (m, 3.40H), 2.67 – 2.46 (m, 2.60H), 2.42 – 2.13 (m, 2.0H), 1.28 (s, 1.74H), 1.09 (s, 1.26H).

$^{13}\text{C NMR}$  (101 MHz,  $\text{CDCl}_3$ )  $\delta$  175.8, 175.7, 174.9, 174.8, 173.4, 172.4, 172.0, 171.9, 135.8, 135.6, 117.3, 117.1, 117.0, 65.3, 65.2, 65.1, 65.1, 58.6, 57.9, 54.5, 54.5, 53.1, 53.0, 52.9, 52.9, 52.8, 52.7, 52.0, 52.0, 49.7, 49.2, 49.1, 49.1, 44.8, 44.7, 44.6, 44.6, 44.4, 44.4, 38.8, 38.8, 37.5, 22.8, 22.8, 19.1, 19.0.

**DART-TOF LC/MS**  $m/z$  calcd. for  $\text{C}_{16}\text{H}_{26}\text{NO}_7$  [ $\text{M}+\text{NH}_4^+$ ] 344.1709, found 344.1705.

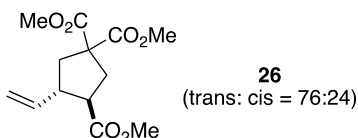

Prepared according to **Procedure C**. Colorless oil (39.8 mg, 74% yield) as a mixture of diastereomers (trans : cis = 76:24).  $R_f = 0.30$  (30% EtOAc in hexane).

$^1\text{H NMR}$  (400 MHz,  $\text{CDCl}_3$ )  $\delta$  5.82 – 5.56 (m, 1.0H), 5.16 – 4.90 (m, 2.0H), 3.89 – 3.52 (m, 9.0H), 3.17 – 2.79 (m, 1.76H), 2.74 – 2.31 (m, 4.0H), 1.97 (dd,  $J = 13.6, 10.8$  Hz, 0.24H).

$^{13}\text{C NMR}$  (101 MHz,  $\text{CDCl}_3$ )  $\delta$  174.0, 173.6, 172.9, 172.3, 172.0, 171.8, 138.3, 136.6, 116.5, 115.9, 59.3, 58.7, 52.9, 52.9, 52.8, 51.8, 51.5, 49.5, 48.0, 47.5, 45.8, 39.9, 38.6, 37.4, 35.9.

**DART-TOF LC/MS**  $m/z$  calcd. for  $\text{C}_{13}\text{H}_{19}\text{O}_6$  [ $\text{M}+\text{H}^+$ ] 271.1182, found 271.1180.

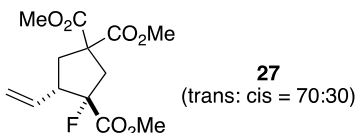

Prepared according to **Procedure C**. Colorless oil (33.3 mg, 58% yield) as a mixture of diastereomers (trans : cis = 70:30).  $R_f = 0.35$  (30% EtOAc in hexane).

$^1\text{H NMR}$  (400 MHz,  $\text{CDCl}_3$ )  $\delta$  5.84 – 5.49 (m, 1.0H), 5.24 – 4.96 (m, 2.0H), 4.01 – 3.55 (m, 9.0H), 3.28 – 2.69 (m, 3.70H), 2.57 (dd,  $J = 13.6, 7.7$  Hz, 0.30H), 2.51 – 2.42 (m, 0.30H), 2.24 (dd,  $J = 13.7, 10.0$  Hz, 0.70H).

$^{13}\text{C NMR}$  (101 MHz,  $\text{CDCl}_3$ )  $\delta$  171.9, 171.5, 171.1, 171.0, 169.9, 169.8, 169.6, 169.6, 133.8, 133.7, 132.2, 132.1, 119.1, 118.6, 103.7, 103.1, 101.8, 101.1, 57.9, 57.9, 57.8, 53.2, 53.2, 53.1, 53.0, 52.8, 52.7, 52.4, 52.2, 52.0, 44.1, 43.9, 42.8, 42.6, 37.6, 37.6, 37.5.

$^{19}\text{F NMR}$  (376 MHz,  $\text{CDCl}_3$ )  $\delta$  -149.0, -170.0.

**DART-TOF LC/MS**  $m/z$  calcd. for  $\text{C}_{13}\text{H}_{18}\text{FO}_6$  [ $\text{M}+\text{H}^+$ ] 289.1087, found 289.1086.

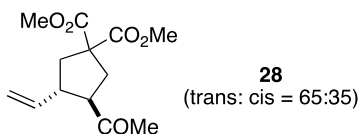

Prepared according to **Procedure C**. Colorless oil (37.0 mg, 73% yield) as a mixture of diastereomers (trans : cis = 65:35).  $R_f = 0.30$  (30% EtOAc in hexane).

**$^1\text{H NMR}$**  (400 MHz,  $\text{CDCl}_3$ )  $\delta$  5.71 (ddd,  $J = 17.0, 10.2, 7.6$  Hz, 0.35H), 5.59 (ddd,  $J = 17.0, 10.1, 9.2$  Hz, 0.65H), 5.15 – 4.96 (m, 2.0H), 3.94 – 3.50 (m, 6.0H), 3.22 (td,  $J = 8.6, 7.1$  Hz, 0.65H), 3.08 – 2.96 (m, 0.65H), 2.86 – 2.72 (m, 0.65H), 2.67 – 2.50 (m, 1.35H), 2.48 – 2.22 (m, 2.35H), 2.12 (s, 1.05H), 2.08 (s, 1.95H), 2.02 – 1.89 (m, 0.35H).

**$^{13}\text{C NMR}$**  (101 MHz,  $\text{CDCl}_3$ )  $\delta$  208.3, 208.2, 172.9, 172.4, 172.0, 171.9, 139.1, 137.0, 116.6, 116.1, 59.0, 58.7, 57.2, 55.4, 52.9, 52.9, 52.8, 47.0, 45.8, 40.3, 39.4, 36.4, 34.8, 31.0, 30.0.

**DART-TOF LC/MS**  $m/z$  calcd. for  $\text{C}_{34}\text{H}_{19}\text{O}_5$  [ $\text{M}+\text{H}^+$ ] 255.1232, found 255.1233.

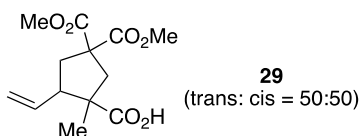

Prepared according to **Procedure C**. Colorless oil (48.7 mg, 90% yield) as a mixture of diastereomers (trans : cis = 50:50).  $R_f = 0.40$  (10% MeOH in DCM).

**$^1\text{H NMR}$**  (400 MHz,  $\text{CDCl}_3$ )  $\delta$  11.63 (brs, 1.0H), 5.93 – 5.54 (m, 1.0H), 5.19 – 4.98 (m, 2.0H), 3.88 – 3.60 (m, 6.0H), 3.13 – 3.03 (m, 0.50H), 2.95 (d,  $J = 14.4$  Hz, 0.50H), 2.88 (d,  $J = 14.4$  Hz, 0.50H), 2.55 (ddd,  $J = 12.4, 9.2, 4.8$  Hz, 1.50H), 2.44 – 2.33 (m, 1.0H), 2.31 – 2.13 (m, 1.0H), 1.28 (s, 1.50H), 1.10 (s, 1.50H).

**$^{13}\text{C NMR}$**  (101 MHz,  $\text{CDCl}_3$ )  $\delta$  182.7, 181.9, 173.4, 172.4, 172.4, 171.9, 135.6, 135.4, 117.7, 117.2, 58.8, 57.9, 54.7, 53.0, 53.0, 53.0, 52.8, 52.8, 51.7, 49.6, 44.8, 44.6, 39.0, 37.6, 22.6, 18.8.

**DART-TOF LC/MS**  $m/z$  calcd. for  $\text{C}_{13}\text{H}_{20}\text{O}_6$  [ $\text{M}+\text{H}^+$ ] 271.1182, found 271.1185.

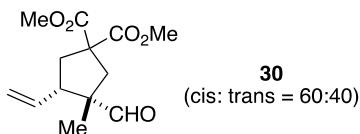

Prepared according to **Procedure C**. Colorless oil (43.8 mg, 86% yield) as a mixture of diastereomers (cis : trans = 60:40).  $R_f = 0.40$  (20% EtOAc in hexane).

**$^1\text{H NMR}$**  (400 MHz,  $\text{CDCl}_3$ )  $\delta$  9.48 (s, 0.40H), 9.43 (s, 0.60H), 5.76 (ddd,  $J = 17.1, 10.3, 8.0$  Hz, 0.40H), 5.60 (ddd,  $J = 17.1, 10.5, 7.5$  Hz, 0.60H), 5.22 – 4.97 (m, 2.0H), 3.93 – 3.55 (m, 6.0H), 2.89 (dd,  $J = 11.7, 0.9$  Hz, 0.60H), 2.78 (dd,  $J = 25.8, 14.5$  Hz, 1.0H), 2.52 (dd,  $J = 13.6, 6.9$  Hz, 1.0H), 2.45 – 2.37 (m, 0.40H), 2.36 – 2.10 (m, 2.0H), 1.24 (s, 1.20H), 1.00 (s, 1.80H).

**$^{13}\text{C NMR}$**  (101 MHz,  $\text{CDCl}_3$ )  $\delta$  204.7, 203.1, 172.9, 172.4, 172.1, 171.9, 135.0, 134.4, 118.0, 117.6, 58.4, 58.1, 56.2, 56.1, 53.8, 53.1, 53.0, 53.0, 52.9, 47.5, 41.8, 40.5, 38.9, 38.0, 19.8, 15.8.

**DART-TOF LC/MS**  $m/z$  calcd. for  $C_{13}H_{19}O_5$   $[M+H^+]$  255.1232, found 255.1231.

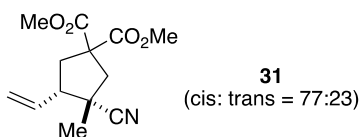

Prepared according to **Procedure C**. Colorless oil (37.8 mg, 75% yield) as a mixture of diastereomers (trans : cis = 77:23).  $R_f$  = 0.30 (30% EtOAc in hexane).

**$^1H$  NMR** (400 MHz,  $CDCl_3$ )  $\delta$  5.90 – 5.62 (m, 1.0H), 5.31 – 5.14 (m, 2.0H), 3.96 – 3.53 (m, 6.0H), 3.05 – 2.90 (m, 1.0H), 2.83 (d,  $J$  = 14.4 Hz, 0.77H), 2.62 – 2.48 (m, 1.77H), 2.48 – 2.31 (m, 0.46H), 2.30 – 2.14 (m, 1.0H), 1.38 (s, 0.69H), 1.20 (s, 2.31H).

**$^{13}C$  NMR** (101 MHz,  $CDCl_3$ )  $\delta$  172.2, 171.7, 171.6, 171.0, 134.4, 133.3, 123.8, 122.0, 119.7, 119.2, 57.7, 57.5, 53.9, 53.3, 53.2, 53.2, 53.2, 51.5, 45.7, 45.2, 43.4, 40.3, 39.2, 36.6, 22.8, 19.7.

**DART-TOF LC/MS**  $m/z$  calcd. for  $C_{13}H_{18}NO_4$   $[M+H^+]$  252.1236, found 252.1232.

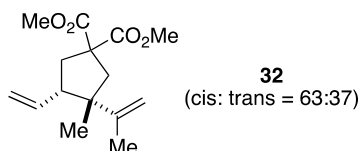

Prepared according to **Procedure C**. Colorless oil (27.1 mg, 51% yield) as a mixture of diastereomers (cis : trans = 63:37).  $R_f$  = 0.40 (10% EtOAc in hexane).

**$^1H$  NMR** (400 MHz,  $CDCl_3$ )  $\delta$  5.78 – 5.57 (m, 1.0H), 5.08 – 4.89 (m, 2.0H), 4.85 – 4.69 (m, 2.0H), 4.02 – 3.52 (m, 6.0H), 2.88 – 2.76 (m, 1.0H), 2.71 (dd,  $J$  = 14.1, 6.8 Hz, 0.37H), 2.51 – 2.20 (m, 3.63H), 1.77 (d,  $J$  = 1.0 Hz, 1.89H), 1.69 (d,  $J$  = 1.4 Hz, 1.11H), 1.11 (s, 1.11H), 0.96 (s, 1.89H).

**$^{13}C$  NMR** (101 MHz,  $CDCl_3$ )  $\delta$  173.5, 173.4, 173.1, 173.0, 149.7, 149.6, 139.0, 137.0, 116.0, 114.7, 111.0, 110.5, 58.5, 57.4, 53.3, 52.9, 52.9, 52.8, 51.3, 49.9, 49.0, 46.2, 44.0, 38.9, 38.0, 26.2, 21.0, 20.1, 20.0.

**DART-TOF LC/MS**  $m/z$  calcd. for  $C_{15}H_{26}NO_4$   $[M+NH_4^+]$  284.1862, found 284.1868.

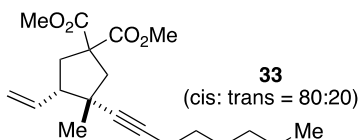

Prepared according to **Procedure C**. Colorless oil (33.6 mg, 50% yield) as a mixture of diastereomers (cis : trans = 80:20).  $R_f$  = 0.45 (10% EtOAc in hexane).

**$^1H$  NMR** (400 MHz,  $CDCl_3$ )  $\delta$  5.88 – 2.42 (m, 1.0H), 5.24 – 4.88 (m, 2.0H), 3.93 – 3.43 (m, 6.0H), 2.81 – 2.63 (m, 1.0H), 2.60 – 2.42 (m, 2.60H), 2.33 – 2.02 (m, 3.40H), 1.50 – 1.21 (m, 8.0H), 1.19 (s, 0.60H), 0.99 (s, 2.40H), 0.90 – 0.84 (m, 3.0H).

**$^{13}C$  NMR** (101 MHz,  $CDCl_3$ )  $\delta$  173.5, 172.8, 172.8, 172.2, 137.6, 136.2, 116.8, 116.4, 85.8, 83.9, 82.5, 80.9, 57.8, 57.7, 55.0, 53.4, 52.9, 52.8, 52.8, 52.6, 48.9, 48.0, 42.5, 40.8, 39.4, 36.8, 31.3, 31.3, 29.0, 28.9, 28.4, 28.4, 25.3, 22.5, 22.0, 18.6, 14.0, 14.0.

**DART-TOF LC/MS** m/z calcd. for C<sub>20</sub>H<sub>31</sub>O<sub>4</sub> [M+H<sup>+</sup>] 335.2222, found 335.2226.

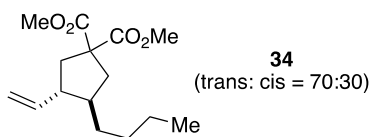

Prepared according to **Procedure C**. Colorless oil (31.2 mg, 58% yield) as a mixture of diastereomers (trans : cis = 70:30). R<sub>f</sub> = 0.45 (10% EtOAc in hexane).

**<sup>1</sup>H NMR** (400 MHz, CDCl<sub>3</sub>) δ 5.80 – 5.50 (m, 1H), 5.06 – 4.91 (m, 2.0H), 3.76 – 3.66 (m, 6.0H), 2.76 – 2.62 (m, 0.70H), 2.59 – 2.51 (m, 0.30H), 2.47 (dd, *J* = 13.9, 7.1 Hz, 1.0H), 2.40 – 2.31 (m, 0.70H), 2.23 – 1.89 (m, 3.0H), 1.78 (dd, *J* = 13.4, 10.8 Hz, 0.30H), 1.67 – 1.05 (m, 6.0H), 0.90 – 0.82 (m, 3.0H).

**<sup>13</sup>C NMR** (101 MHz, CDCl<sub>3</sub>) δ 168.6, 168.5, 168.4, 168.4, 135.6, 133.6, 110.5, 110.4, 72.6, 72.3, 72.0, 54.2, 53.6, 48.0, 48.0, 45.7, 41.6, 40.5, 38.3, 35.9, 35.6, 34.5, 28.1, 25.6, 25.6, 25.3, 18.1, 18.1, 9.3, 9.2.

**DART-TOF LC/MS** m/z calcd. for C<sub>15</sub>H<sub>25</sub>O<sub>4</sub> [M+H<sup>+</sup>] 269.1753, found 269.1757.

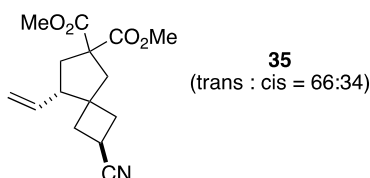

Prepared according to **Procedure C**. Colorless oil (39.8 mg, 72% yield) as a mixture of diastereomers (trans : cis = 66:34). R<sub>f</sub> = 0.30 (20% EtOAc in hexane).

**<sup>1</sup>H NMR** (400 MHz, CDCl<sub>3</sub>) δ 5.84 – 5.64 (m, 1.0H), 5.31 – 4.96 (m, 2.0H), 3.90 – 3.45 (m, 6.0H), 3.07 – 2.92 (m, 0.34H), 2.88 – 2.73 (m, 0.66H), 2.61 (dd, *J* = 27.5, 14.0 Hz, 1.0H), 2.52 – 1.88 (m, 8.0H).

**<sup>13</sup>C NMR** (101 MHz, CDCl<sub>3</sub>) δ 172.5, 172.5, 172.5, 136.0, 135.7, 122.4, 122.0, 118.4, 118.3, 57.4, 57.3, 52.3, 52.9, 51.5, 51.4, 47.5, 47.3, 47.2, 45.3, 37.9, 37.7, 34.4, 34.4, 33.3, 32.4, 16.9, 16.4.

**DART-TOF LC/MS** m/z calcd. for C<sub>15</sub>H<sub>23</sub>N<sub>2</sub>O<sub>4</sub> [M+NH<sub>4</sub><sup>+</sup>] 295.1658, found 295.1656.

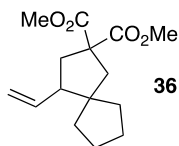

Prepared according to **Procedure C** (0.4 mmol). Colorless oil (67.2 mg, 63% yield). R<sub>f</sub> = 0.45 (10% EtOAc in hexane).

**<sup>1</sup>H NMR** (400 MHz, CDCl<sub>3</sub>) δ 5.78 – 5.60 (m, 1H), 5.08 – 4.91 (m, 2H), 3.70 (s, 3H), 3.69 (s, 3H), 2.57 – 2.31 (m, 3H), 2.19 – 2.01 (m, 2H), 1.65 – 1.13 (m, 8H).

**<sup>13</sup>C NMR** (101 MHz, CDCl<sub>3</sub>) δ 173.4, 173.2, 137.6, 116.2, 57.8, 53.7, 52.7, 52.7, 51.8, 47.4, 39.2, 37.2, 32.1, 24.7, 24.4.

**DART-TOF LC/MS** m/z calcd. for C<sub>15</sub>H<sub>23</sub>O<sub>4</sub> [M+H<sup>+</sup>] 267.1596, found 267.1600.

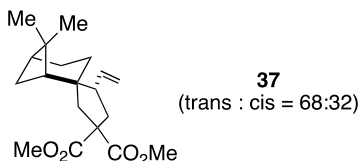

Prepared according to **Procedure C**. Colorless oil (43.5 mg, 68% yield) as a mixture of diastereomers (trans : cis = 68:32).  $R_f = 0.40$  (10% EtOAc in hexane).

**$^1\text{H NMR}$**  (400 MHz,  $\text{CDCl}_3$ )  $\delta$  5.97 – 5.82 (m, 0.68H), 5.72 – 5.52 (m, 0.32H), 5.09 – 4.81 (m, 2.0H), 3.75 – 3.65 (m, 6.0H), 2.60 (d,  $J = 14.1$  Hz, 0.68H), 2.50 – 2.24 (m, 2.64H), 2.18 (d,  $J = 14.1$  Hz, 0.68H), 2.12 – 1.97 (m, 2.0H), 1.94 – 1.59 (m, 5.32H), 1.45 – 1.22 (m, 1.68H), 1.17 (s, 3.0H), 0.99 (s, 2.04H), 0.97 (s, 0.96H).

**$^{13}\text{C NMR}$**  (101 MHz,  $\text{CDCl}_3$ )  $\delta$  173.5, 173.4, 173.3, 173.3, 139.1, 138.9, 115.9, 114.8, 59.4, 57.8, 55.9, 53.5, 52.8, 52.7, 52.7, 50.6, 50.2, 49.3, 48.4, 47.2, 40.2, 39.8, 39.2, 38.9, 38.3, 37.8, 29.6, 28.1, 27.8, 27.8, 27.6, 25.6, 25.4, 23.9, 23.8, 22.6.

**DART-TOF LC/MS**  $m/z$  calcd. for  $\text{C}_{19}\text{H}_{32}\text{NO}_4$  [ $\text{M}+\text{NH}_4^+$ ] 338.2331, found 338.2326.

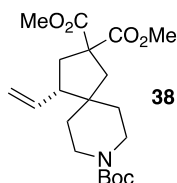

Prepared according to **Procedure C**. Colorless oil (50.3 mg, 66% yield).  $R_f = 0.30$  (30% EtOAc in hexane).

**$^1\text{H NMR}$**  (400 MHz,  $\text{CDCl}_3$ )  $\delta$  5.63 (ddd,  $J = 17.0, 10.3, 7.7$  Hz, 1H), 5.11 – 4.92 (m, 2H), 3.89 (brs, 2H), 3.70 (s, 3H), 3.70 (s, 3H), 2.93 – 2.67 (m, 2H), 2.57 (d,  $J = 14.2$  Hz, 1H), 2.48 (dd,  $J = 12.9, 6.0$  Hz, 1H), 2.35 – 2.11 (m, 2H), 2.01 (dd,  $J = 14.1, 1.5$  Hz, 1H), 1.64 – 1.50 (m, 1H), 1.41 (s, 9H), 1.34 – 1.13 (m, 3H).

**$^{13}\text{C NMR}$**  (101 MHz,  $\text{CDCl}_3$ )  $\delta$  173.1, 173.0, 154.8, 136.3, 117.1, 79.3, 57.8, 53.6, 52.9, 52.8, 44.3, 41.7, 37.5, 36.1, 29.7, 28.4.

**DART-TOF LC/MS**  $m/z$  calcd. for  $\text{C}_{20}\text{H}_{32}\text{NO}_6$  [ $\text{M}+\text{H}^+$ ] 382.2230, found 382.2232.

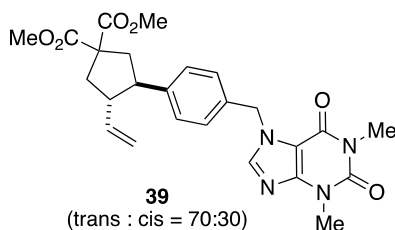

Prepared according to **Procedure C**. Colorless oil (82.5 mg, 86% yield) as a mixture of diastereomers (trans : cis = 70:30).  $R_f = 0.30$  (30% acetone in hexane).

**$^1\text{H NMR}$**  (400 MHz,  $\text{CDCl}_3$ )  $\delta$  7.52 (s, 0.30H), 7.51 (s, 0.70H), 7.23 – 7.04 (m, 4.0H), 5.54 (ddd,  $J = 17.2, 10.5, 7.0$  Hz, 0.30H), 5.40 (s, 2.0H), 5.25 (ddd,  $J = 17.1, 10.3, 8.0$  Hz, 0.70H), 4.86 – 4.68 (m, 2.0H), 3.90 – 3.58 (m, 6.0H), 3.49 (s, 3H), 3.42 – 3.26 (m,

3.70H), 3.00 – 2.88 (m, 0.70H), 2.86 – 2.74 (m, 0.30H), 2.72 – 2.41 (m, 3.0H), 2.33 – 2.16 (m, 1.0H), 2.14 – 2.03 (m, 0.30H).

<sup>13</sup>C NMR (101 MHz, CDCl<sub>3</sub>) δ 172.9, 172.8, 172.7, 172.5, 155.2, 151.6, 148.8, 142.1, 141.4, 140.9, 138.5, 137.8, 133.7, 133.3, 129.0, 128.3, 128.1, 127.8, 115.8, 115.6, 106.9, 106.9, 58.8, 58.0, 52.9, 52.8, 52.8, 50.9, 50.7, 49.9, 49.9, 47.7, 47.3, 42.2, 40.2, 38.9, 38.0, 29.7, 27.9.

**DART-TOF LC/MS** m/z calcd. for C<sub>25</sub>H<sub>29</sub>N<sub>4</sub>O<sub>6</sub> [M+H<sup>+</sup>] 481.2087, found 481.2089.

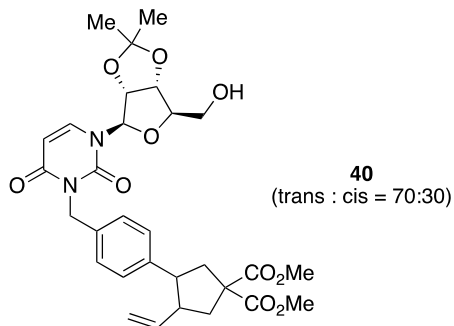

Prepared according to **Procedure C**. Colorless oil (85.2 mg, 73% yield) as a mixture of diastereomers (trans : cis = 70:30). R<sub>f</sub> = 0.30 (30% acetone in hexane).

<sup>1</sup>H NMR (400 MHz, CDCl<sub>3</sub>) δ 7.40 – 7.31 (m, 3.0H), 7.17 – 7.00 (m, 2.0H), 5.73 (dd, *J* = 8.0, 1.1 Hz, 1.0H), 5.66 – 5.54 (m, 1.30H), 5.33 (ddd, *J* = 17.1, 10.3, 7.9 Hz, 0.70H), 5.12 – 4.76 (m, 6.0H), 4.28 (q, *J* = 2.9 Hz, 1.0H), 3.94 – 3.82 (m, 1.0H), 3.81 – 3.69 (m, 7.0H), 3.43 – 3.30 (m, 0.70H), 3.10 – 2.92 (m, 1.70H), 2.88 – 2.77 (m, 0.30H), 2.76 – 2.46 (m, 3.0H), 2.36 (dd, *J* = 14.0, 6.0 Hz, 0.70H), 2.32 – 2.22 (m, 0.30H), 2.19 – 2.07 (m, 0.30H), 1.55 (s, 3.0H), 1.34 (s, 3.0H).

<sup>13</sup>C NMR (101 MHz, CDCl<sub>3</sub>) δ 173.1, 172.9, 172.9, 172.6, 162.6, 151.0, 141.1, 140.5, 140.3, 138.6, 138.1, 134.6, 134.3, 129.3, 128.9, 128.4, 127.6, 115.7, 115.5, 114.2, 102.0, 96.4, 96.4, 86.9, 84.0, 80.4, 62.6, 58.9, 58.1, 52.9, 52.9, 52.8, 51.0, 50.6, 50.5, 47.7, 47.2, 43.9, 42.5, 40.2, 38.9, 38.1, 27.3, 25.3.

**ESI-TOF LC/MS** m/z calcd. for C<sub>30</sub>H<sub>37</sub>N<sub>2</sub>O<sub>10</sub> [M+H<sup>+</sup>] 585.2448, found 585.2453.

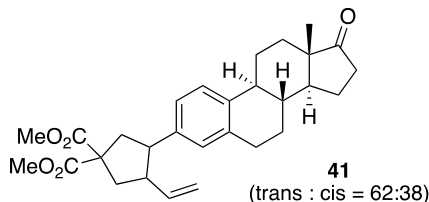

Prepared according to **Procedure C**. Colorless oil (50.8 mg, 55% yield) as a mixture of diastereomers (trans : cis = 62:38). R<sub>f</sub> = 0.35 (20% EtOAc in hexane).

<sup>1</sup>H NMR (400 MHz, CDCl<sub>3</sub>) δ 7.24 – 7.15 (m, 1.0H), 7.05 – 6.82 (m, 2.0H), 5.73 – 5.58 (m, 0.38H), 5.49 – 5.32 (m, 0.62H), 5.01 – 4.76 (m, 2.0H), 4.00 – 3.55 (m, 6.0H), 3.44 – 3.27 (m, 0.62H), 3.06 – 2.95 (m, 0.62H), 2.92 – 1.91 (m, 13.76H), 1.74 – 1.37 (m, 6.0H), 0.90 (s, 3.0H).

<sup>13</sup>C NMR (101 MHz, CDCl<sub>3</sub>) δ 173.1, 173.0, 173.0, 172.9, 172.7, 138.9, 138.9, 138.4, 138.1, 138.1, 138.0, 138.0, 137.6, 136.4, 136.4, 136.0, 129.2, 128.8, 128.4, 128.0, 126.0,

125.7, 125.4, 125.4, 125.1, 125.0, 124.8, 115.5, 115.3, 58.9, 58.0, 52.9, 52.8, 50.9, 50.9, 50.5, 50.3, 50.3, 48.0, 47.5, 47.5, 47.1, 47.1, 44.3, 44.3, 42.7, 42.6, 40.2, 39.0, 38.3, 38.2, 38.2, 38.1, 35.9, 31.6, 29.7, 29.5, 29.4, 26.6, 25.7, 21.6, 13.9.

**DART-TOF LC/MS**  $m/z$  calcd. for  $C_{29}H_{37}O_5$   $[M+H]^+$  465.2641, found 465.2642.

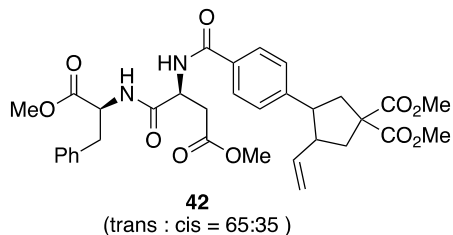

Prepared according to **Procedure C**. Colorless oil (100.4 mg, 81% yield) as a mixture of diastereomers (trans : cis = 65:35).  $R_f$  = 0.30 (30% acetone in hexane).

**$^1H$  NMR** (400 MHz,  $CDCl_3$ )  $\delta$  7.72 – 7.54 (m, 3.0H), 7.35 – 6.98 (m, 8.0H), 5.69 – 5.56 (m, 0.35H), 5.34 (ddd,  $J$  = 17.1, 10.3, 8.2 Hz, 0.65H), 5.07 – 4.70 (m, 4.0H), 3.83 – 3.76 (m, 6.0H), 3.71 (s, 6.0H), 3.55 – 3.44 (m, 0.65H), 3.19 – 2.53 (m, 8.0H), 2.44 – 2.32 (m, 1.0H), 2.26 – 2.13 (m, 0.35H).

**$^{13}C$  NMR** (101 MHz,  $CDCl_3$ )  $\delta$  173.1, 173.1, 173.0, 172.9, 172.8, 172.5, 171.4, 170.2, 167.0, 146.2, 145.4, 138.3, 137.7, 135.6, 135.6, 131.5, 131.1, 129.1, 128.6, 128.5, 128.5, 127.9, 127.4, 127.0, 127.0, 116.1, 115.9, 59.0, 58.2, 53.5, 53.0, 53.0, 52.9, 52.9, 52.4, 52.2, 51.3, 49.3, 47.9, 47.5, 42.1, 40.4, 39.0, 38.0, 37.9, 37.7, 34.8.

**ESI-TOF LC/MS**  $m/z$  calcd. for  $C_{33}H_{42}N_3O_{10}$   $[M+NH_4]^+$  640.2870, found 640.2872.

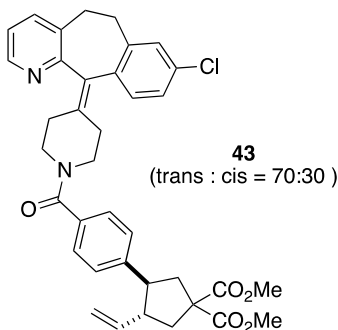

Prepared according to **Procedure C**. Colorless oil (92.7 mg, 74% yield) as a mixture of diastereomers (trans : cis = 70:30).  $R_f$  = 0.35 (30% acetone in hexane).

**$^1H$  NMR** (400 MHz,  $CDCl_3$ )  $\delta$  8.37 (brs, 1.0H), 7.50 – 6.95 (m, 9.0H), 5.59 (ddd,  $J$  = 17.2, 10.5, 6.9 Hz, 0.30H), 5.29 (ddd,  $J$  = 17.0, 10.3, 8.0 Hz, 0.70H), 4.89 – 4.74 (m, 2.0H), 4.17 (brs, 1.0H), 3.86 – 3.70 (m, 6.0H), 3.68 – 3.54 (m, 1H), 3.50 – 3.13 (m, 4.30H), 3.05 – 2.94 (m, 0.70H), 2.91 – 2.08 (m, 11.0H).

**$^{13}C$  NMR** (101 MHz,  $CDCl_3$ )  $\delta$  173.0, 172.9, 172.8, 172.5, 170.4, 170.4, 146.7, 143.4, 142.7, 139.6, 138.3, 137.8, 137.6, 136.9, 134.7, 134.3, 133.9, 133.4, 133.0, 130.5, 129.0, 128.4, 127.7, 127.1, 126.8, 126.2, 122.3, 115.9, 115.8, 58.9, 58.1, 53.0, 52.9, 52.9, 52.9, 51.2, 50.9, 47.9, 47.3, 42.3, 40.3, 38.9, 38.1, 31.7, 31.6, 31.5.

**ESI-TOF LC/MS**  $m/z$  calcd. for  $C_{37}H_{38}ClN_2O_5$   $[M+H]^+$  625.2469, found 625.2473.

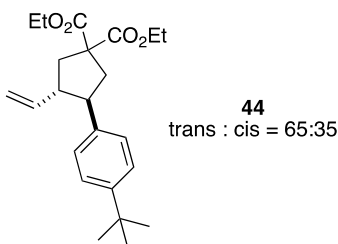

Prepared according to **Procedure C**. Colorless oil (69.1 mg, 93% yield) as a mixture of diastereomers (trans : cis = 65:35).  $R_f = 0.45$  (10% EtOAc in hexane).

**$^1\text{H NMR}$**  (400 MHz,  $\text{CDCl}_3$ )  $\delta$  7.34 – 7.25 (m, 2.0H), 7.20 – 7.02 (m, 2.0H), 5.68 (ddd,  $J = 17.3, 10.5, 6.9$  Hz, 0.35H), 5.40 (ddd,  $J = 17.0, 10.3, 7.8$  Hz, 0.65H), 4.98 – 4.78 (m, 2.0H), 4.44 – 4.00 (m, 4.0H), 3.45 – 3.33 (m, 0.65H), 3.07 – 2.95 (m, 0.65H), 2.91 – 2.51 (m, 3.35H), 2.44 – 2.25 (m, 1.0H), 2.15 (dd,  $J = 13.2, 10.5$  Hz, 0.35H), 1.39 – 1.16 (m, 15.0H).

**$^{13}\text{C NMR}$**  (101 MHz,  $\text{CDCl}_3$ )  $\delta$  172.8, 172.6, 172.6, 172.3, 149.2, 148.9, 139.1, 138.5, 138.5, 137.8, 128.0, 127.2, 125.2, 124.9, 115.4, 115.2, 61.6, 61.5, 61.5, 59.1, 58.2, 50.9, 50.4, 47.6, 47.3, 42.5, 40.1, 38.8, 38.1, 34.4, 34.4, 31.4, 14.1, 14.0.

**DART-TOF LC/MS**  $m/z$  calcd. for  $\text{C}_{23}\text{H}_{33}\text{O}_4$   $[\text{M}+\text{H}^+]$  373.2379, found 373.2381.

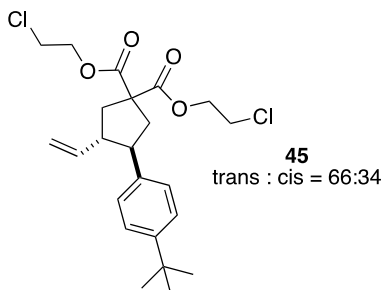

Prepared according to **Procedure C**. Colorless oil (72.5 mg, 82% yield) as a mixture of diastereomers (trans : cis = 66:34).  $R_f = 0.45$  (10% EtOAc in hexane).

**$^1\text{H NMR}$**  (400 MHz,  $\text{CDCl}_3$ )  $\delta$  7.34 – 7.28 (m, 2.0H), 7.19 – 7.05 (m, 2.0H), 5.68 (ddd,  $J = 16.6, 11.0, 6.9$  Hz, 0.34H), 5.41 (ddd,  $J = 17.1, 10.3, 7.8$  Hz, 0.66H), 5.01 – 4.78 (m, 2.0H), 4.68 – 4.20 (m, 4.0H), 3.78 – 3.66 (m, 4.0H), 3.45 (dt,  $J = 10.5, 7.4$  Hz, 0.66H), 3.11 – 2.98 (m, 0.66H), 2.94 – 2.58 (m, 3.34H), 2.51 – 2.32 (m, 1.0H), 2.26 – 2.17 (m, 0.34H), 1.31 (s, 9.0H).

**$^{13}\text{C NMR}$**  (101 MHz,  $\text{CDCl}_3$ )  $\delta$  172.1, 171.9, 171.9, 171.7, 149.4, 149.2, 138.8, 138.2, 138.1, 137.4, 128.0, 127.2, 125.3, 125.0, 115.6, 115.5, 65.1, 65.1, 65.0, 59.0, 58.1, 50.9, 50.4, 47.6, 47.3, 42.5, 41.4, 41.4, 40.1, 38.9, 38.2, 34.4, 34.4, 31.4.

**DART-TOF LC/MS**  $m/z$  calcd. for  $\text{C}_{23}\text{H}_{31}\text{Cl}_2\text{O}_4$   $[\text{M}+\text{H}^+]$  441.1599, found 441.1602.



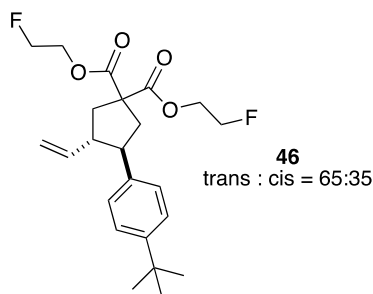

Prepared according to **Procedure C**. Colorless oil (74.5 mg, 91% yield) as a mixture of diastereomers (trans : cis = 65:35).  $R_f = 0.33$  (30% EtOAc in hexane).

**$^1\text{H NMR}$**  (400 MHz,  $\text{CDCl}_3$ )  $\delta$  7.37 – 7.28 (m, 2.0H), 7.20 – 7.04 (m, 2.0H), 5.78 – 5.61 (m, 0.35H), 5.41 (ddd,  $J = 17.1, 10.3, 7.8$  Hz, 0.65H), 4.99 – 4.81 (m, 2.0H), 4.70 – 4.62 (m, 2.0H), 4.58 – 4.52 (m, 2.0H), 4.46 – 4.43 (m, 2.0H), 4.42 – 4.34 (m, 2.0H), 3.45 (dt,  $J = 10.6, 7.4$  Hz, 0.65H), 3.11 – 2.98 (m, 0.65H), 2.95 – 2.57 (m, 3.35H), 2.51 – 2.32 (m, 1.0H), 2.27 – 2.15 (m, 0.35H), 1.31 (s, 9.0H).

**$^{13}\text{C NMR}$**  (101 MHz,  $\text{CDCl}_3$ )  $\delta$  172.4, 172.2, 172.1, 171.9, 149.4, 149.1, 138.8, 138.2, 138.1, 137.4, 128.0, 127.2, 125.3, 125.0, 115.6, 115.4, 81.8, 80.2, 80.1, 64.6, 64.5, 64.5, 64.4, 64.3, 64.3, 58.9, 58.1, 50.8, 50.4, 47.6, 47.3, 42.5, 40.1, 38.8, 38.1, 34.4, 34.4, 31.4.

**$^{19}\text{F NMR}$**  (376 MHz,  $\text{CDCl}_3$ )  $\delta$  -225.09, -225.10, -225.12, -225.12, -225.16, -225.16.

**DART-TOF LC/MS**  $m/z$  calcd. for  $\text{C}_{23}\text{H}_{34}\text{F}_2\text{NO}_4$  [ $\text{M}+\text{NH}_4^+$ ] 426.2456, found 426.2452.

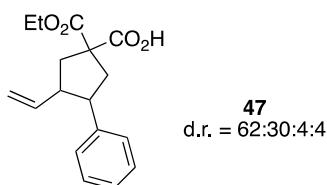

Prepared according to **Procedure C**. Colorless oil (53.0 mg, 92% yield) as a mixture of diastereomers (d.r. = 62:30:4:4).  $R_f = 0.35$  (10% MeOH in DCM).

**$^1\text{H NMR}$**  (400 MHz,  $\text{CDCl}_3$ )  $\delta$  11.14 (brs, 1.0H), 7.43 – 6.79 (m, 5.0H), 5.73 – 5.57 (m, 0.30H), 5.46 – 5.32 (m, 0.66H), 5.28 – 5.22 (m, 0.04H), 4.97 – 4.76 (m, 2.0H), 4.37 – 4.12 (m, 2.0H), 3.58 – 3.40 (m, 0.66H), 3.14 – 2.98 (m, 0.66H), 2.97 – 1.93 (m, 4.68H), 1.45 – 1.20 (m, 3.0H).

**$^{13}\text{C NMR}$**  (101 MHz,  $\text{CDCl}_3$ )  $\delta$  178.6, 178.3, 178.1, 172.1, 171.8, 141.3, 140.7, 140.6, 138.6, 138.1, 138.0, 128.4, 128.3, 128.1, 127.6, 126.7, 126.3, 115.8, 115.8, 115.5, 115.5, 62.1, 62.0, 59.1, 59.1, 58.1, 51.6, 50.9, 50.9, 48.1, 48.0, 47.4, 42.6, 42.5, 40.4, 40.3, 39.0, 39.0, 38.1, 38.1, 14.0.

**DART-TOF LC/MS**  $m/z$  calcd. for  $\text{C}_{17}\text{H}_{21}\text{O}_4$  [ $\text{M}+\text{H}^+$ ] 289.1440, found 289.1441.

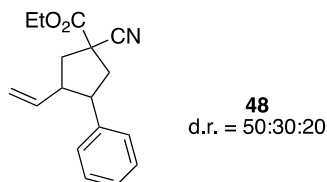

Prepared according to **Procedure C**. Colorless oil (45.1 mg, 84% yield) as a mixture of diastereomers (d.r. = 50:30:20).  $R_f = 0.35$  (30% EtOAc in hexane).

**$^1\text{H NMR}$**  (400 MHz,  $\text{CDCl}_3$ )  $\delta$  7.32 – 6.99 (m, 5.0H), 5.67 – 5.50 (m, 0.30H), 5.42 – 5.31 (m, 0.20H), 5.25 (ddd,  $J = 17.1, 10.2, 8.1$  Hz, 0.50H), 4.99 – 4.68 (m, 2.0H), 4.40 – 4.10 (m, 2.0H), 3.68 – 3.56 (m, 0.50H), 3.52 – 3.41 (m, 0.20H), 3.20 – 3.12 (m, 0.50H), 3.09 – 2.31 (m, 4.50H), 2.27 – 2.15 (m, 0.30H), 1.36 – 1.21 (m, 3.0H).

**$^{13}\text{C NMR}$**  (101 MHz,  $\text{CDCl}_3$ )  $\delta$  169.9, 169.7, 169.6, 169.1, 140.5, 139.9, 139.7, 139.1, 137.7, 137.2, 137.1, 136.5, 128.7, 128.6, 128.4, 128.3, 128.3, 128.2, 127.6, 127.5, 127.1, 127.0, 126.7, 121.3, 121.2, 121.1, 116.7, 116.7, 116.6, 116.1, 63.1, 51.7, 51.6, 51.2, 50.5, 48.5, 47.8, 47.8, 47.3, 47.0, 45.2, 45.1, 43.3, 43.1, 42.0, 41.6, 41.6, 40.8, 14.0, 14.0.

**DART-TOF LC/MS**  $m/z$  calcd. for  $\text{C}_{17}\text{H}_{23}\text{N}_2\text{O}_2$  [ $\text{M}+\text{NH}_4^+$ ] 287.1760, found 287.1758.

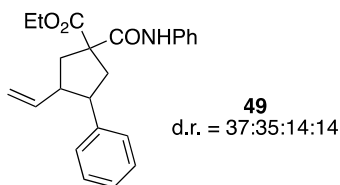

Prepared according to **Procedure C**. Colorless oil (67.6 mg, 93% yield) as a mixture of diastereomers (d.r. = 37:35:14:14).  $R_f = 0.45$  (30% EtOAc in hexane).

**$^1\text{H NMR}$**  (400 MHz,  $\text{CDCl}_3$ )  $\delta$  8.33 (brs, 0.28H), 8.07 (brs, 0.37H), 7.99 (brs, 0.35H), 7.52 – 7.39 (m, 2.0H), 7.32 – 6.96 (m, 8.0H), 5.70 – 5.49 (m, 0.30H), 5.32 (dddd,  $J = 17.1, 10.4, 7.9, 1.7$  Hz, 0.70H), 4.92 – 4.66 (m, 2.0H), 4.37 – 4.08 (m, 2.0H), 3.46 (dt,  $J = 10.8, 7.4$  Hz, 0.37H), 3.36 (dt,  $J = 10.6, 7.7$  Hz, 0.35H), 3.09 – 2.40 (m, 4.86H), 2.39 – 2.29 (m, 0.28H), 2.22 – 2.12 (m, 0.14H), 1.36 – 1.19 (m, 3.0H).

**$^{13}\text{C NMR}$**  (101 MHz,  $\text{CDCl}_3$ )  $\delta$  175.1, 174.8, 174.7, 169.1, 168.7, 168.1, 141.6, 141.0, 140.9, 138.9, 138.8, 138.5, 138.2, 137.9, 137.8, 129.1, 129.0, 128.5, 128.4, 128.3, 128.1, 128.0, 127.7, 127.6, 126.6, 126.6, 126.3, 126.2, 124.5, 124.5, 120.0, 120.0, 119.9, 119.9, 115.6, 115.6, 115.4, 115.3, 62.5, 62.4, 62.3, 61.1, 60.5, 59.3, 52.0, 51.5, 51.3, 51.0, 48.1, 48.0, 47.4, 47.3, 43.1, 42.9, 41.1, 39.5, 39.4, 38.2, 37.7, 14.1, 14.0.

**DART-TOF LC/MS**  $m/z$  calcd. for  $\text{C}_{23}\text{H}_{29}\text{N}_2\text{O}_3$  [ $\text{M}+\text{NH}_4^+$ ] 381.2178, found 381.2173.

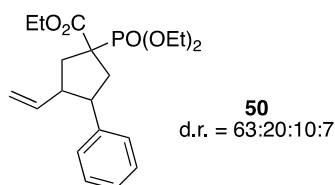

Prepared according to **Procedure C**. Colorless oil (65.7 mg, 86% yield) as a mixture of diastereomers (d.r. = 37:35:14:14).  $R_f = 0.35$  (30% acetone in hexane).

**$^1\text{H NMR}$**  (400 MHz,  $\text{CDCl}_3$ )  $\delta$  7.26 – 7.05 (m, 5.0H), 5.56 (ddd,  $J = 17.2, 9.9, 7.2$  Hz, 0.32H), 5.28 (ddd,  $J = 17.1, 10.2, 8.4$  Hz, 0.68H), 4.91 – 4.57 (m, 2.0H), 4.35 – 3.92 (m, 6.0H), 3.52 – 3.15 (m, 0.73H), 3.04 – 2.03 (m, 5.27H), 1.54 – 1.02 (m, 9.0H).

**$^{13}\text{C NMR}$**  (101 MHz,  $\text{CDCl}_3$ )  $\delta$  172.3, 171.8, 171.7, 141.9, 141.4, 141.3, 139.2, 138.9, 138.5, 137.4, 128.6, 128.4, 128.2, 128.0, 128.0, 127.7, 127.6, 126.6, 126.5, 126.2, 126.1,

115.8, 115.7, 115.4, 114.9, 63.1, 63.0, 62.9, 62.9, 62.9, 62.8, 62.8, 62.7, 61.8, 61.8, 55.0, 53.6, 51.6, 51.6, 51.5, 51.1, 51.0, 50.8, 50.8, 47.8, 47.7, 47.6, 47.4, 47.2, 41.1, 41.1, 40.2, 38.0, 38.0, 37.6, 37.6, 37.3, 37.3, 16.5, 16.5, 16.4, 16.4, 14.1.

$^{31}\text{P}$  NMR (162 MHz,  $\text{CDCl}_3$ )  $\delta$  27.3, 26.6, 26.1.

**DART-TOF LC/MS**  $m/z$  calcd. for  $\text{C}_{20}\text{H}_{33}\text{NPO}_5$   $[\text{M}+\text{NH}_4^+]$  398.2096, found 398.2100.

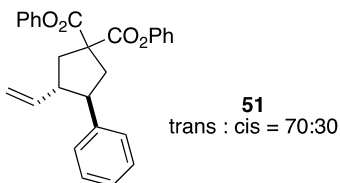

Prepared according to **Procedure C**. Colorless oil (75.9 mg, 92% yield) as a mixture of diastereomers (trans : cis = 70:30).  $R_f$  = 0.35 (10% EtOAc in hexane).

$^1\text{H}$  NMR (400 MHz,  $\text{CDCl}_3$ )  $\delta$  7.43 – 6.94 (m, 15.0H), 5.64 (ddd,  $J$  = 17.3, 9.9, 7.0 Hz, 0.30H), 5.39 (ddd,  $J$  = 17.1, 10.3, 7.9 Hz, 0.70H), 4.95 – 4.76 (m, 2.0H), 3.54 (dt,  $J$  = 10.6, 7.4 Hz, 0.70H), 3.17 – 3.04 (m, 0.70H), 3.02 – 2.74 (m, 3.30H), 2.65 – 2.50 (m, 1.0H), 2.45 – 2.31 (m, 0.30H).

$^{13}\text{C}$  NMR (101 MHz,  $\text{CDCl}_3$ )  $\delta$  171.1, 170.6, 150.7, 150.7, 141.2, 140.4, 138.4, 137.8, 129.6, 128.6, 128.4, 128.2, 127.7, 126.8, 126.5, 126.3, 121.2, 121.2, 116.0, 115.9, 59.3, 58.4, 51.6, 50.9, 48.2, 47.6, 42.6, 40.4, 39.1, 38.2.

**DART-TOF LC/MS**  $m/z$  calcd. for  $\text{C}_{27}\text{H}_{28}\text{NO}_4$   $[\text{M}+\text{NH}_4^+]$  430.2018, found 430.2015.

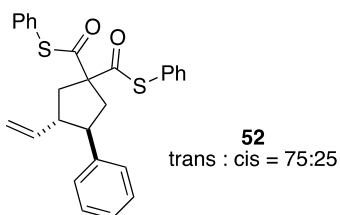

Prepared according to **Procedure C**. Colorless oil (69.4 mg, 78% yield) as a mixture of diastereomers (trans : cis = 75:25).  $R_f$  = 0.40 (30% EtOAc in hexane).

$^1\text{H}$  NMR (400 MHz,  $\text{CDCl}_3$ )  $\delta$  7.53 – 6.96 (m, 15.0H), 5.68 – 5.48 (m, 0.25H), 5.27 (ddd,  $J$  = 17.6, 10.3, 7.8 Hz, 0.75H), 4.94 – 4.65 (m, 2.0H), 3.46 – 3.31 (m, 0.75H), 3.07 – 2.41 (m, 5.0H), 2.30 (dd,  $J$  = 13.8, 10.8 Hz, 0.25H).

$^{13}\text{C}$  NMR (101 MHz,  $\text{CDCl}_3$ )  $\delta$  196.8, 196.6, 196.5, 196.0, 141.1, 140.4, 138.4, 137.8, 134.8, 134.8, 134.7, 129.8, 129.4, 129.4, 128.5, 128.4, 128.2, 127.6, 127.0, 127.0, 126.8, 126.5, 116.1, 115.8, 74.8, 73.8, 51.3, 50.6, 47.6, 46.9, 42.3, 40.1, 38.8, 38.0.

**DART-TOF LC/MS**  $m/z$  calcd. for  $\text{C}_{27}\text{H}_{28}\text{NO}_2\text{S}_2$   $[\text{M}+\text{NH}_4^+]$  462.1561, found 462.1560.

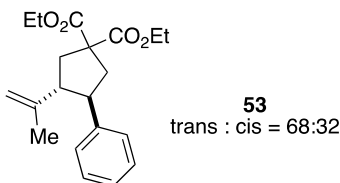

Prepared according to **Procedure C**. Colorless oil (52.0 mg, 79% yield) as a mixture of diastereomers (trans : cis = 68:32).  $R_f = 0.35$  (4:1 hex:EtOAc).

$^1\text{H NMR}$  (400 MHz,  $\text{CDCl}_3$ )  $\delta$  7.27 – 6.99 (m, 5.0H), 4.64 – 4.50 (m, 2.0H), 4.26 – 4.09 (m, 4.0H), 3.49 – 3.36 (m, 0.68H), 3.06 – 2.64 (m, 2.32H), 2.56 (dd,  $J = 13.6, 7.4$  Hz, 0.32H), 2.49 – 2.34 (m, 2.0H), 2.18 (ddd,  $J = 25.3, 13.7, 11.6$  Hz, 0.68H), 1.56 (s, 0.96H), 1.24 – 1.10 (m, 8.04H).

$^{13}\text{C NMR}$  (101 MHz,  $\text{CDCl}_3$ )  $\delta$  172.7, 172.6, 172.6, 172.1, 145.0, 144.1, 142.4, 142.1, 128.4, 127.8, 127.4, 126.5, 126.1, 112.1, 111.7, 61.6, 61.5, 59.3, 57.9, 53.5, 49.9, 49.1, 46.8, 42.8, 40.1, 39.5, 37.8, 22.7, 19.8, 14.1.

**DART-TOF LC/MS**  $m/z$  calcd. for  $\text{C}_{20}\text{H}_{30}\text{NO}_4$   $[\text{M}+\text{NH}_4^+]$  348.2175, found 348.2171.

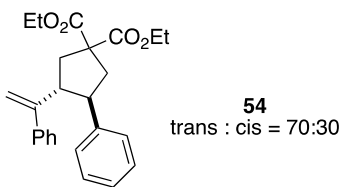

Prepared according to **Procedure C**. Colorless oil (63.2 mg, 81% yield) as a mixture of diastereomers (trans : cis = 70:30).  $R_f = 0.35$  (10% EtOAc in hexane).

$^1\text{H NMR}$  (400 MHz,  $\text{CDCl}_3$ )  $\delta$  7.25 – 6.58 (m, 10.0H), 5.10 (d,  $J = 0.9$  Hz, 0.30H), 5.02 (d,  $J = 0.8$  Hz, 0.30H), 4.95 (d,  $J = 0.9$  Hz, 0.70H), 4.75 (d,  $J = 0.8$  Hz, 0.70H), 4.31 – 4.04 (m, 4.0H), 3.64 – 3.51 (m, 0.70H), 3.42 (td,  $J = 8.7, 5.9$  Hz, 0.70H), 3.32 – 3.11 (m, 0.60H), 2.95 (ddd,  $J = 14.5, 8.6, 1.2$  Hz, 0.70H), 2.84 (dd,  $J = 13.8, 7.5$  Hz, 0.30H), 2.75 (dd,  $J = 13.6, 6.9$  Hz, 0.30H), 2.64 (dd,  $J = 13.2, 12.1$  Hz, 0.70H), 2.52 (ddd,  $J = 13.2, 6.1, 1.2$  Hz, 0.70H), 2.38 (dd,  $J = 14.5, 5.9$  Hz, 0.70H), 2.21 (dd,  $J = 13.8, 10.9$  Hz, 0.30H), 2.01 (dd,  $J = 13.6, 11.2$  Hz, 0.30H), 1.34 – 1.08 (m, 6.0H).

$^{13}\text{C NMR}$  (101 MHz,  $\text{CDCl}_3$ )  $\delta$  172.6, 172.6, 172.3, 172.1, 148.9, 148.0, 142.7, 142.0, 142.0, 141.9, 128.7, 128.4, 128.1, 127.9, 127.5, 127.4, 127.2, 127.1, 126.5, 126.5, 126.3, 125.9, 113.2, 113.2, 61.7, 61.6, 61.6, 61.5, 59.2, 57.7, 50.3, 49.7, 47.0, 46.3, 42.8, 41.7, 40.8, 38.1, 14.1, 14.1, 14.0.

**DART-TOF LC/MS**  $m/z$  calcd. for  $\text{C}_{25}\text{H}_{32}\text{NO}_4$   $[\text{M}+\text{NH}_4^+]$  410.2331, found 410.2330.

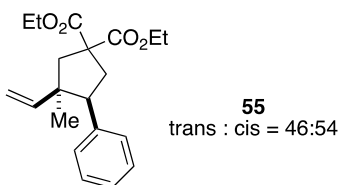

Prepared according to **Procedure C**. Colorless oil (38.8 mg, 59% yield) as a mixture of diastereomers (trans : cis = 46:54).  $R_f = 0.40$  (10% EtOAc in hexane).

$^1\text{H NMR}$  (400 MHz,  $\text{CDCl}_3$ )  $\delta$  7.26 – 7.05 (m, 5.0H), 5.83 (dd,  $J = 17.4, 10.7$  Hz, 0.46H), 5.46 (dd,  $J = 17.4, 10.9$  Hz, 0.54H), 4.97 – 4.64 (m, 2.0H), 4.26 – 4.05 (m, 4.0H), 3.02 (dd,  $J = 13.4, 6.6$  Hz, 0.46H), 2.92 (dd,  $J = 13.7, 6.0$  Hz, 0.54H), 2.82 (t,  $J = 13.5$  Hz, 0.46H), 2.74 – 2.58 (m, 1.08H), 2.55 – 2.46 (m, 0.92H), 2.41 – 2.28 (m, 1.08H), 2.22 (d,  $J = 14.1$  Hz, 0.46H), 1.24 – 1.14 (m, 6.0H), 1.07 (s, 1.62H), 0.70 (s, 1.38H).

$^{13}\text{C}$  NMR (101 MHz,  $\text{CDCl}_3$ )  $\delta$  173.2, 172.9, 172.6, 172.4, 146.4, 141.9, 138.4, 138.3, 128.9, 128.5, 127.7, 127.7, 126.7, 126.6, 113.1, 112.4, 61.6, 61.6, 61.5, 57.4, 57.1, 55.4, 53.8, 48.4, 48.3, 47.0, 44.4, 38.0, 37.1, 25.7, 19.0, 14.1, 14.0.

**DART-TOF LC/MS**  $m/z$  calcd. for  $\text{C}_{20}\text{H}_{30}\text{NO}_4$  [ $\text{M}+\text{NH}_4^+$ ] 348.2175, found 348.2172.

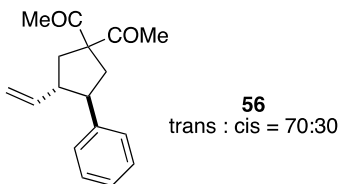

Prepared according to **Procedure C**. Colorless oil (44.1 mg, 86% yield) as a mixture of diastereomers (trans : cis = 70:30).  $R_f$  = 0.35 (20% EtOAc in hexane).

$^1\text{H}$  NMR (400 MHz,  $\text{CDCl}_3$ )  $\delta$  7.28 – 6.97 (m, 5.0H), 5.61 – 5.44 (m, 0.30H), 5.22 (ddd,  $J$  = 17.1, 10.3, 7.9 Hz, 0.70H), 4.90 – 4.66 (m, 2.0H), 3.18 (dt,  $J$  = 10.6, 7.2 Hz, 0.70H), 2.90 – 2.80 (m, 0.70H), 2.75 (dd,  $J$  = 13.2, 7.4 Hz, 0.30H), 2.68 – 2.57 (m, 1.40H), 2.56 – 2.47 (m, 0.30H), 2.45 – 2.22 (m, 2.0H), 2.13 – 2.01 (m, 6.0H), 2.00 (dd,  $J$  = 13.3, 11.2 Hz, 0.30H), 1.84 (dd,  $J$  = 13.3, 10.8 Hz, 0.30H).

$^{13}\text{C}$  NMR (101 MHz,  $\text{CDCl}_3$ )  $\delta$  204.9, 204.6, 204.5, 204.5, 141.4, 140.6, 138.7, 138.0, 128.5, 128.2, 128.1, 127.5, 126.7, 126.3, 115.7, 115.6, 74.4, 73.2, 51.2, 50.3, 47.8, 47.3, 39.3, 36.9, 35.5, 34.3, 27.0, 26.4, 26.3, 26.0.

**DART-TOF LC/MS**  $m/z$  calcd. for  $\text{C}_{14}\text{H}_{24}\text{NO}_2$  [ $\text{M}+\text{NH}_4^+$ ] 274.1807, found 274.1804.

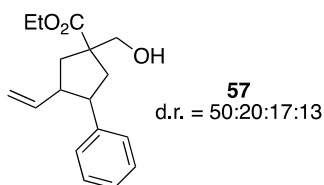

Prepared according to **Procedure C**. Colorless oil (44.3 mg, 81% yield) as a mixture of diastereomers (d.r. = 50:20:17:13).  $R_f$  = 0.30 (30% EtOAc in hexane).

$^1\text{H}$  NMR (400 MHz,  $\text{CDCl}_3$ )  $\delta$  7.33 – 6.96 (m, 5.0H), 5.71 – 5.27 (m, 1.0H), 4.87 – 4.68 (m, 2.0H), 4.24 – 4.09 (m, 2.0H), 3.79 – 3.60 (m, 2.0H), 3.52 (dt,  $J$  = 11.8, 7.2 Hz, 0.50H), 3.31 (dt,  $J$  = 10.5, 7.4 Hz, 0.17H), 3.12 – 1.45 (m, 6.0H), 1.32 – 1.11 (m, 3.0H), 0.95 – 0.80 (m, 0.33H).

$^{13}\text{C}$  NMR (101 MHz,  $\text{CDCl}_3$ )  $\delta$  177.7, 177.6, 177.6, 177.4, 142.0, 142.0, 141.3, 141.3, 139.4, 139.3, 139.0, 138.8, 128.4, 128.4, 128.3, 128.1, 128.0, 127.6, 127.5, 126.4, 126.1, 126.1, 115.3, 115.2, 115.2, 115.0, 69.2, 68.1, 68.0, 67.5, 61.2, 61.1, 61.1, 61.1, 54.3, 53.8, 52.8, 52.8, 51.8, 51.3, 51.1, 50.4, 48.2, 48.0, 47.4, 42.5, 41.6, 40.2, 39.1, 38.5, 38.2, 37.6, 36.2, 14.2, 14.2, 14.1.

**DART-TOF LC/MS**  $m/z$  calcd. for  $\text{C}_{17}\text{H}_{26}\text{NO}_3$  [ $\text{M}+\text{NH}_4^+$ ] 292.1907, found 292.1905.

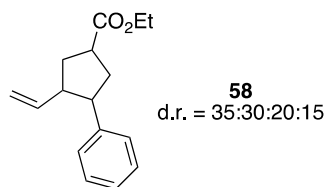

Prepared according to **Procedure C** (0.4 mmol). Colorless oil (60.9 mg, 62% yield) as a mixture of diastereomers (trans : cis = 35:30:20:15).  $R_f = 0.45$  (10% EtOAc in hexane).

**$^1\text{H NMR}$**  (400 MHz,  $\text{CDCl}_3$ )  $\delta$  7.30 – 7.01 (m, 5.0H), 5.72 – 5.50 (m, 0.55H), 5.42 – 5.22 (m, 0.45H), 4.91 – 4.57 (m, 2.0H), 4.24 – 3.91 (m, 2.0H), 3.45 – 1.74 (m, 7.0H), 1.32 – 1.04 (m, 3.0H).

**$^{13}\text{C NMR}$**  (101 MHz,  $\text{CDCl}_3$ )  $\delta$  176.9, 176.4, 176.3, 175.9, 143.2, 142.6, 141.8, 141.5, 140.0, 139.8, 139.3, 138.6, 128.5, 128.4, 128.3, 128.3, 128.0, 128.0, 127.6, 127.5, 126.4, 126.3, 126.1, 114.9, 114.8, 114.6, 60.5, 60.5, 52.6, 52.3, 51.2, 50.8, 49.0, 48.8, 48.1, 48.1, 42.9, 42.0, 41.8, 41.5, 38.7, 38.1, 36.6, 35.7, 34.9, 34.7, 34.2, 33.4, 14.3, 14.3.

**DART-TOF LC/MS**  $m/z$  calcd. for  $\text{C}_{14}\text{H}_{24}\text{NO}_2$  [ $\text{M}+\text{NH}_4^+$ ] 262.1807, found 262.1805.

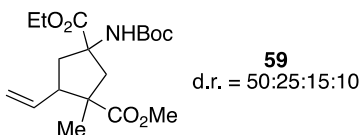

Prepared according to **Procedure C**. Colorless oil (63.7 mg, 90% yield) as a mixture of diastereomers (trans : cis = 50:25:15:10).  $R_f = 0.35$  (20% EtOAc in hexane).

**$^1\text{H NMR}$**  (400 MHz,  $\text{CDCl}_3$ )  $\delta$  5.90 – 5.57 (m, 1.0H), 5.44 – 4.80 (m, 3.0H), 4.28 – 4.04 (m, 2.0H), 3.75 – 3.40 (m, 3.0H), 3.36 – 1.72 (m, 5.0H), 1.58 – 0.92 (m, 15.0H).

**$^{13}\text{C NMR}$**  (101 MHz,  $\text{CDCl}_3$ )  $\delta$  177.9, 176.6, 175.9, 174.4, 173.4, 173.2, 155.2, 136.3, 136.2, 136.0, 135.9, 116.9, 116.7, 116.6, 65.2, 61.5, 61.4, 61.4, 61.4, 54.2, 54.0, 53.1, 52.5, 52.3, 52.0, 51.8, 51.7, 51.6, 51.0, 49.2, 48.8, 48.0, 42.1, 28.3, 24.9, 22.9, 20.7, 14.1, 14.1, 14.1.

**ESI-TOF LC/MS**  $m/z$  calcd. for  $\text{C}_{18}\text{H}_{30}\text{NO}_6$  [ $\text{M}+\text{H}^+$ ] 356.2073, found 356.2075.

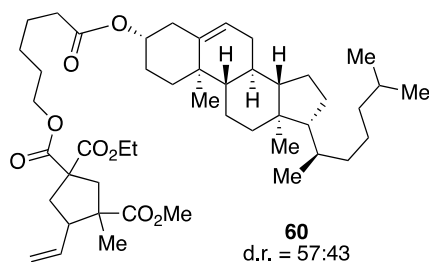

Prepared according to **Procedure C**. Colorless oil (89.2 mg, 58% yield) as a mixture of diastereomers (d.r. = 57:43).  $R_f = 0.50$  (10% EtOAc in hexane).

**$^1\text{H NMR}$**  (400 MHz,  $\text{CDCl}_3$ )  $\delta$  5.81 – 5.55 (m, 1.0H), 5.36 (brs, 1.0H), 5.16 – 4.98 (m, 2.0H), 4.72 – 4.51 (m, 1.0H), 4.29 – 3.97 (m, 4.0H), 3.67 (s, 1.29H), 3.60 (s, 1.71H), 3.12 – 3.01 (m, 0.43H), 2.91 (dd,  $J = 14.4$ , 4.7 Hz, 0.57H), 2.83 (dd,  $J = 14.3$ , 3.2 Hz, 0.43H), 2.58 – 2.44 (m, 1.57H), 2.41 – 2.14 (m, 6.0H), 2.05 – 0.59 (m, 53.0H).

**<sup>13</sup>C NMR** (101 MHz, CDCl<sub>3</sub>) δ 176.6, 175.7, 173.1, 173.0, 172.8, 172.8, 172.8, 172.1, 172.0, 171.6, 171.5, 139.6, 136.1, 135.9, 122.6, 117.0, 116.8, 73.8, 73.8, 65.5, 65.5, 65.3, 61.7, 61.7, 61.7, 61.4, 58.9, 58.0, 56.7, 56.1, 54.6, 54.6, 53.0, 52.1, 52.0, 51.5, 51.5, 50.0, 49.8, 49.7, 44.8, 44.7, 44.6, 42.3, 39.7, 39.5, 38.9, 38.8, 38.1, 37.4, 37.0, 36.6, 36.2, 35.8, 34.5, 34.4, 31.9, 31.8, 28.2, 28.2, 28.0, 27.8, 25.4, 25.3, 24.6, 24.6, 24.5, 24.3, 23.8, 22.9, 22.9, 22.8, 22.6, 21.0, 19.3, 19.0, 18.9, 18.7, 14.1, 14.0, 11.8.

**ESI-TOF LC/MS** m/z calcd. for C<sub>47</sub>H<sub>75</sub>O<sub>8</sub> [M+H<sup>+</sup>] 767.5462, found 767.5466.

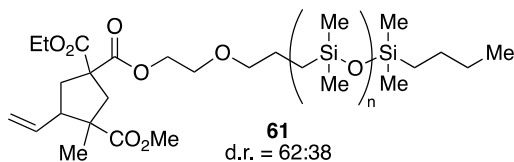

Prepared according to **Procedure C**. Colorless oil (229.7 mg, 77% yield) as a mixture of diastereomers (d.r. = 62:38). R<sub>f</sub> = 0.50 (10% EtOAc in hexane).

**<sup>1</sup>H NMR** (400 MHz, CDCl<sub>3</sub>) δ 5.86 – 5.50 (m, 1.0H), 5.15 – 4.91 (m, 2.0H), 4.37 – 4.05 (m, 4.0H), 3.77 – 3.54 (m, 5.0H), 3.46 – 3.32 (m, 2.0H), 3.16 – 3.02 (m, 0.38H), 2.94 (d, *J* = 14.4 Hz, 0.62H), 2.86 (dd, *J* = 14.3, 10.6 Hz, 0.38H), 2.61 – 2.47 (m, 1.62H), 2.44 – 2.16 (m, 2.0H), 1.66 – 1.50 (m, 2.0H), 1.38 – 1.19 (m, 9.0H), 1.10 (d, *J* = 1.4 Hz, 1.0H), 0.92 – 0.82 (m, 3.0H), 0.61 – 0.45 (m, 4.0H), 0.28 – -0.17 (m, 74.0H).

**<sup>13</sup>C NMR** (101 MHz, CDCl<sub>3</sub>) δ 175.5, 174.7, 174.6, 172.0, 171.9, 171.1, 170.8, 170.6, 170.3, 135.1, 134.9, 134.8, 116.0, 116.0, 115.8, 73.1, 73.0, 67.2, 67.2, 63.8, 63.7, 63.6, 60.7, 60.7, 60.6, 60.4, 57.9, 57.8, 57.0, 53.6, 53.5, 52.0, 52.0, 51.0, 50.9, 50.4, 48.7, 48.7, 43.7, 43.6, 43.6, 37.8, 36.4, 25.3, 24.4, 22.4, 21.9, 21.8, 17.9, 17.8, 16.9, 13.1, 13.1, 13.0, 12.9, 12.8, 0.4, 0.1, 0.00, -0.4, -0.9, -1.0.

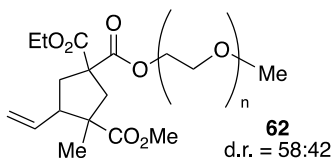

Prepared according to **Procedure C**. Colorless oil (108.3 mg, 75% yield) as a mixture of diastereomers (d.r. = 58:42). R<sub>f</sub> = 0.30 (30% acetone in hexane).

**<sup>1</sup>H NMR** (400 MHz, CDCl<sub>3</sub>) δ 5.82 – 5.54 (m, 1.0H), 5.15 – 4.90 (m, 2.0H), 4.36 – 4.09 (m, 4.0H), 3.81 – 3.48 (m, 44.0H), 3.35 (s, 3.0H), 3.11 – 2.99 (m, 0.42H), 2.90 (d, *J* = 14.4 Hz, 0.58H), 2.83 (dd, *J* = 14.3, 5.6 Hz, 0.42H), 2.60 – 2.43 (m, 1.58H), 2.41 – 2.14 (m, 2.0H), 1.35 – 1.17 (m, 4.74H), 1.08 (d, *J* = 1.8 Hz, 1.26H).

**<sup>13</sup>C NMR** (101 MHz, CDCl<sub>3</sub>) δ 176.5, 175.6, 175.6, 172.9, 172.8, 172.0, 171.8, 171.8, 171.5, 171.3, 136.0, 135.9, 135.8, 117.0, 117.0, 116.8, 71.9, 70.6, 70.6, 70.5, 70.5, 68.8, 68.8, 68.8, 64.7, 64.7, 64.6, 64.5, 61.7, 61.7, 61.7, 61.4, 59.0, 58.8, 58.8, 57.9, 57.9, 54.6, 53.0, 53.0, 52.0, 52.0, 51.9, 51.5, 49.7, 49.7, 44.7, 44.6, 44.6, 38.8, 37.3, 37.3, 22.9, 22.77, 18.9, 18.8, 14.0, 14.0.

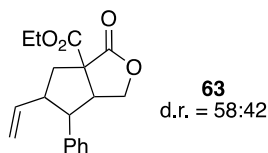

Prepared according to **Procedure C**. Colorless oil (25.7 mg, 43% yield) as a mixture of diastereomers (d.r. = 58:42).  $R_f = 0.30$  (10% EtOAc in hexane).

**$^1\text{H NMR}$**  (400 MHz,  $\text{CDCl}_3$ )  $\delta$  7.33 – 6.91 (m, 5.0H), 5.56 – 5.43 (m, 0.42H), 5.32 – 5.15 (m, 0.58H), 4.93 – 4.63 (m, 2.0H), 4.58 – 4.07 (m, 4.0H), 3.77 – 1.69 (m, 5.0H), 1.35 – 1.05 (m, 3.0H).

**$^{13}\text{C NMR}$**  (101 MHz,  $\text{CDCl}_3$ )  $\delta$  176.5, 176.4, 171.3, 169.7, 169.4, 169.0, 138.9, 138.9, 138.6, 137.7, 137.1, 136.5, 128.9, 128.5, 128.4, 128.1, 127.8, 127.5, 127.0, 126.8, 116.5, 116.4, 115.1, 72.0, 69.8, 69.4, 62.5, 62.5, 62.4, 61.6, 60.7, 59.3, 57.7, 56.6, 55.9, 55.1, 52.5, 51.8, 50.4, 48.7, 43.4, 38.1, 37.5, 33.6, 14.2, 14.1.

**DART-TOF LC/MS**  $m/z$  calcd. for  $\text{C}_{18}\text{H}_{24}\text{NO}_4$  [ $\text{M}+\text{NH}_4^+$ ] 318.1705, found 318.1703.

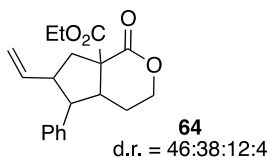

Prepared according to **Procedure C**. Colorless oil (45.1 mg, 72% yield) as a mixture of diastereomers (d.r. = 46:38:12:4).  $R_f = 0.30$  (10% EtOAc in hexane).

**$^1\text{H NMR}$**  (400 MHz,  $\text{CDCl}_3$ )  $\delta$  7.35 – 6.96 (m, 5.0H), 5.82 (ddd,  $J = 17.5, 10.2, 7.8$  Hz, 0.04H), 5.51 (ddd,  $J = 17.4, 10.5, 7.1$  Hz, 0.46H), 5.40 (ddd,  $J = 17.0, 10.4, 8.0$  Hz, 0.38H), 5.23 (ddd,  $J = 17.2, 10.2, 8.1$  Hz, 0.12H), 4.490 – 4.23 (m, 2.0H), 4.48 – 4.07 (m, 4.0H), 3.77 – 2.71 (m, 3.0H), 2.69 – 1.70 (m, 3.0H), 1.63 – 1.42 (m, 1.0H), 1.32 – 1.20 (m, 3.0H).

**$^{13}\text{C NMR}$**  (101 MHz,  $\text{CDCl}_3$ )  $\delta$  172.1, 171.7, 171.5, 171.4, 171.2, 170.1, 139.9, 139.5, 138.9, 138.9, 137.8, 137.6, 128.7, 128.7, 128.6, 128.3, 128.3, 127.7, 127.5, 127.2, 126.8, 126.6, 116.0, 115.9, 114.6, 67.9, 67.2, 67.0, 62.6, 62.4, 62.1, 59.5, 59.1, 59.0, 57.6, 56.9, 50.0, 50.0, 49.5, 47.9, 46.5, 45.2, 44.2, 40.7, 39.7, 37.0, 28.0, 27.9, 22.8, 14.1, 14.0, 14.0.

**DART-TOF LC/MS**  $m/z$  calcd. for  $\text{C}_{19}\text{H}_{26}\text{NO}_4$  [ $\text{M}+\text{NH}_4^+$ ] 332.1862, found 332.1858.

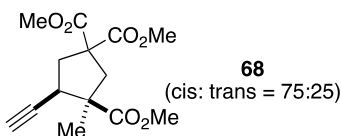

Prepared according to **Procedure C**. Colorless oil (37.3 mg, 66% yield) as a mixture of inseparable diastereomers (cis : trans = 75:25).  $R_f = 0.30$  (20% EtOAc in hexane).

**$^1\text{H NMR}$**  (400 MHz,  $\text{CDCl}_3$ )  $\delta$  3.74 (s, 2.25H), 3.72 (s, 3.00H), 3.71 (s, 0.75H), 3.70 (s, 0.75H), 3.67 (s, 2.25H), 3.34 (ddd,  $J = 10.0, 7.2, 2.5$  Hz, 0.25 H), 2.99 (d,  $J = 14.5$  Hz, 0.75H), 2.81 – 2.66 (m, 2H), 2.60 (dd,  $J = 13.0, 6.9$  Hz, 0.75H), 2.45 (d,  $J = 14.3$  Hz, 0.25H), 2.33 (dd,  $J = 13.8, 10.2$  Hz, 0.25H), 2.20 – 2.10 (m, 1.75H), 1.36 (s, 2.25H), 1.33 (s, 0.75H).



$^{13}\text{C}$  NMR (101 MHz,  $\text{CDCl}_3$ )  $\delta$  175.8, 175.0, 173.0, 172.0, 171.7, 171.4, 82.1, 81.7, 72.1, 71.5, 58.9, 58.1, 53.7, 53.1, 53.0, 53.0, 52.9, 52.4, 51.8, 43.8, 43.7, 41.4, 39.7, 39.2, 37.9, 29.7, 23.0, 20.5.

**DART-TOF LC/MS**  $m/z$  calcd. for  $\text{C}_{14}\text{H}_{22}\text{NO}_6$  [ $\text{M}+\text{NH}_4^+$ ] 300.1447, found 300.1446.

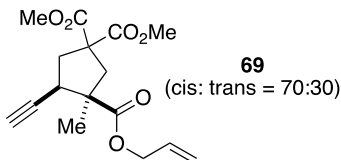

Prepared according to **Procedure C**. Colorless oil (29.8 mg, 48% yield) as a mixture of inseparable diastereomers (cis : trans = 70:30).  $R_f$  = 0.35 (20% EtOAc in hexane).

$^1\text{H}$  NMR (400 MHz,  $\text{CDCl}_3$ )  $\delta$  5.93 – 5.76 (m, 1.0H), 5.26 (d,  $J$  = 17.2, 1.0H), 5.20 – 5.10 (m, 1.0H), 4.59 – 4.44 (m, 2.0H), 3.75 – 3.58 (m, 6.0H), 3.30 (ddd,  $J$  = 10.0, 7.2, 2.5 Hz, 0.30H), 2.96 (d,  $J$  = 14.5 Hz, 0.70H), 2.77 – 2.62 (m, 2.0H), 2.55 (dd,  $J$  = 13.0, 6.8 Hz, 0.70H), 2.41 (d,  $J$  = 14.4 Hz, 0.30H), 2.28 (dd,  $J$  = 13.7, 10.3 Hz, 0.30H), 2.18 – 2.02 (m, 1.70H), 1.33 (s, 2.10H), 1.30 (s, 0.90H).

$^{13}\text{C}$  NMR (101 MHz,  $\text{CDCl}_3$ )  $\delta$  174.9, 174.2, 173.1, 171.9, 171.7, 171.4, 132.1, 131.9, 118.2, 118.0, 82.1, 81.7, 72.1, 71.7, 65.7, 65.6, 58.9, 58.1, 53.7, 53.1, 53.1, 53.0, 52.9, 51.9, 43.8, 43.7, 41.4, 39.8, 39.3, 37.9, 29.7, 23.1, 20.5.

**DART-TOF LC/MS**  $m/z$  calcd. for  $\text{C}_{16}\text{H}_{24}\text{NO}_6$  [ $\text{M}+\text{NH}_4^+$ ] 326.1604, found 326.1602.

## 7. Reference

1. Fujihashi, M.; Ishida, T.; Kuroda, S.; Kotra, L. P.; Pai, E. F.; Miki, K. Substrate Distortion Contributes to the Catalysis of Orotidine 5'-Monophosphate Decarboxylase. *J. Am. Chem. Soc.* **2013**, *135*, 17432-17443.
2. Ding, S.; Cao, S.; Zhu, A.; Shi, G. Wettability Switching of Electrode for Signal Amplification: Conversion of Conformational Change of Stimuli-Responsive Polymer into Enhanced Electrochemical Chiral Analysis. *Anal. Chem.* **2016**, *88*, 12219 -12226.
3. (a) Hashimoto, T.; Kawamata, Y.; Maruoka, K. An organic thiyl radical catalyst for enantioselective cyclization. *Nat. Chem.* **2014**, *6*, 702-705. (b) Emmett, M. R.; Kerr, M. A. Nucleophilic ring opening of cyclopropane hemimalonates using internal Brønsted acid activation. *Org. Lett.* **2011**, *13*, 4180-4183. (c) Seiji, Y.; Akiko, A.; Naoko, K.; Keiko, H.; Hajime, Y.; Yoshiro, H. *Bull. Chem. Soc. Jpn.* **1997**, *70*, 215-2219. (d) Pierre L. Beaulieu, P. L.; Gillard, J.; Bailey, M. D.; Boucher, C.; Duceppe, J.-C.; Simoneau, B.; Wang, X.-J.; Zhang, L.; Grozinger, K.; Houpis, I.; Farina, V.; Heimroth, H.; Krueger, T.; Schnaubelt, J. Synthesis of (1R,2S)-1-amino-2-vinylcyclopropanecarboxylic acid vinyl-ACCA derivatives: key intermediates for the preparation of inhibitors of the hepatitis C virus NS3 protease. *J. Org. Chem.* **2005**, *70*, 5869-5879. (e) Umeyama, T.; Naka, K.; Chujo, Y. Radical copolymerization of cyclic diarsine with vinyl monomers. *J. Polym. Sci., Part A: Polym. Chem.* **2004**, *42*, 3023–3028.

## 8. NMR Spectra

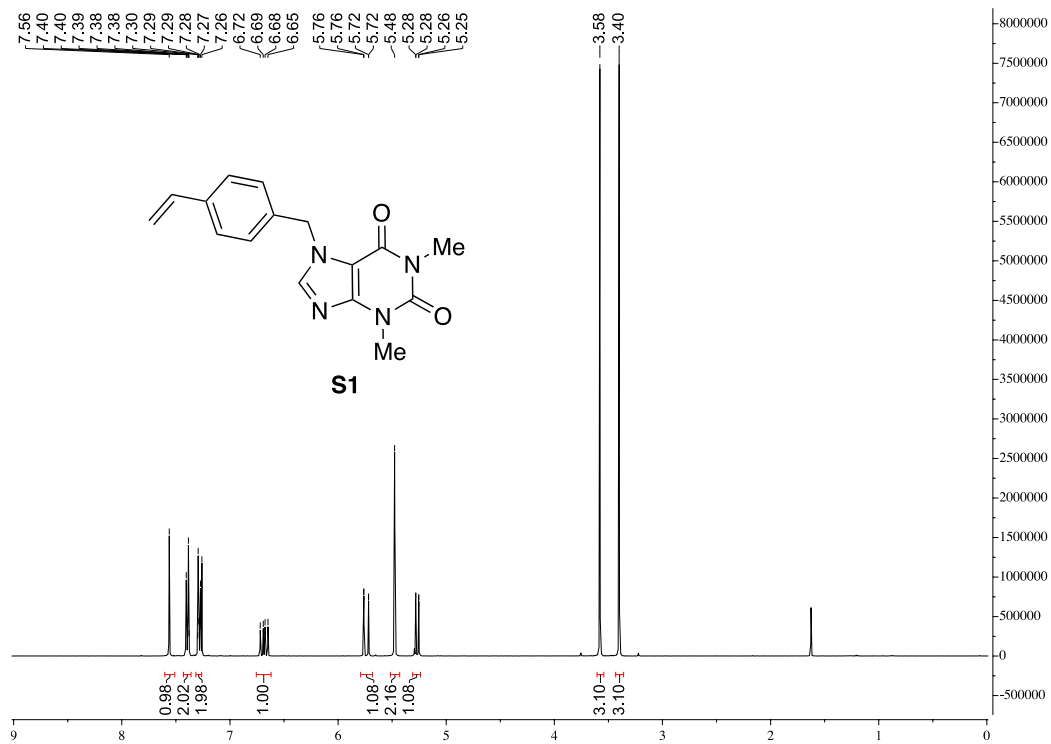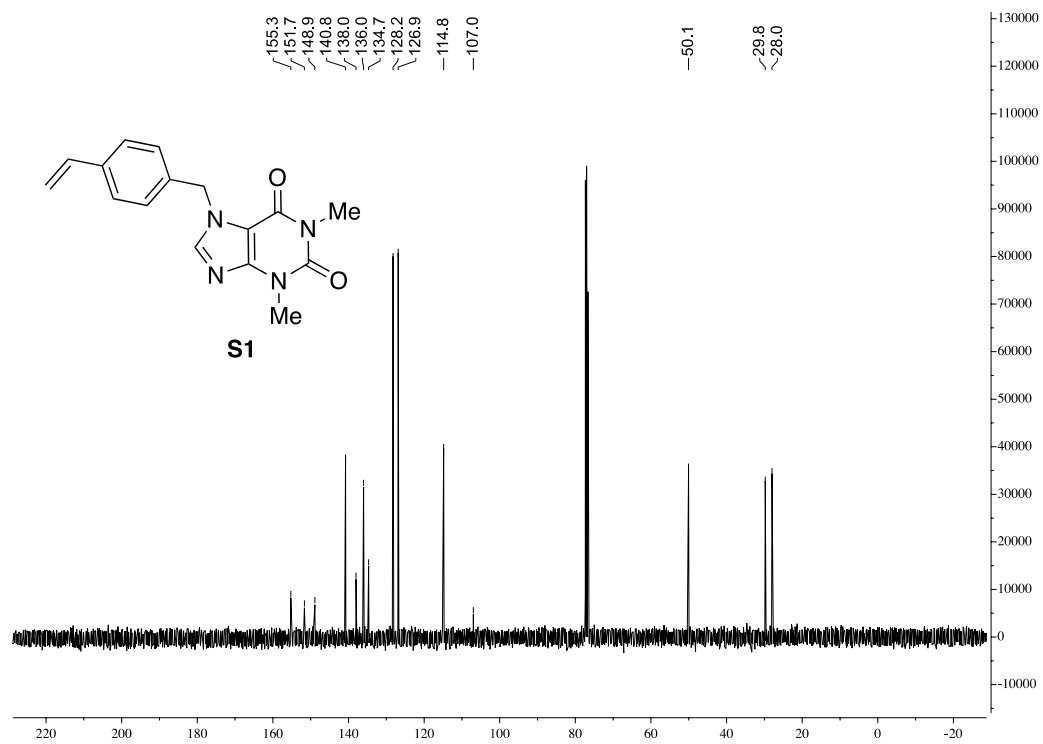

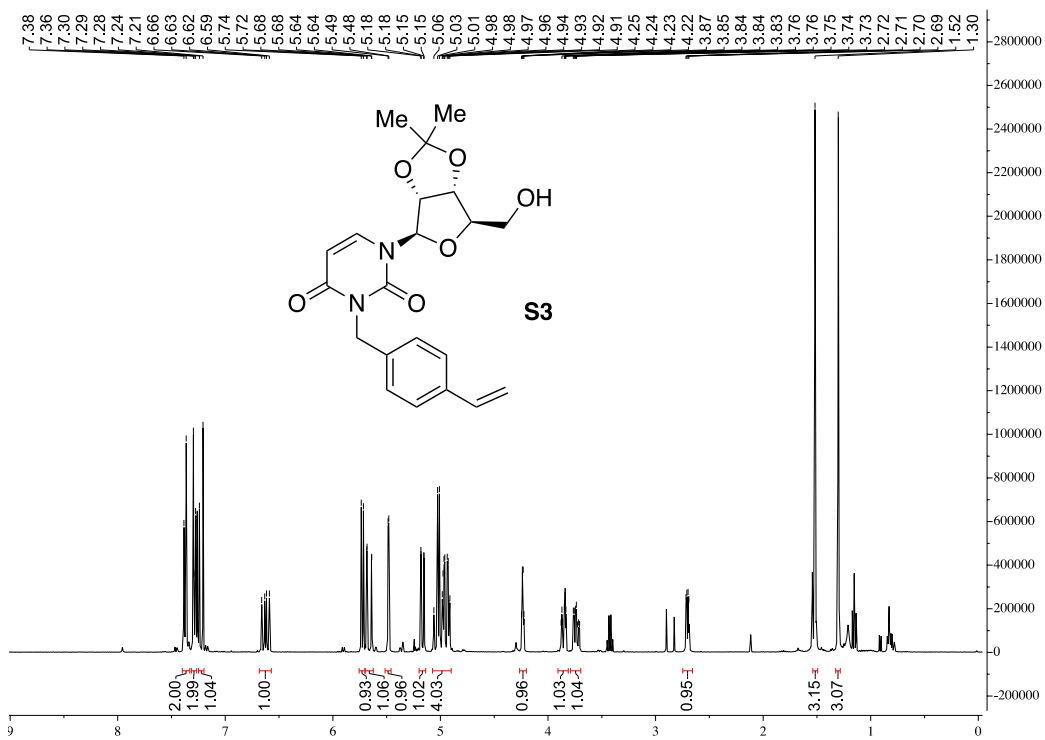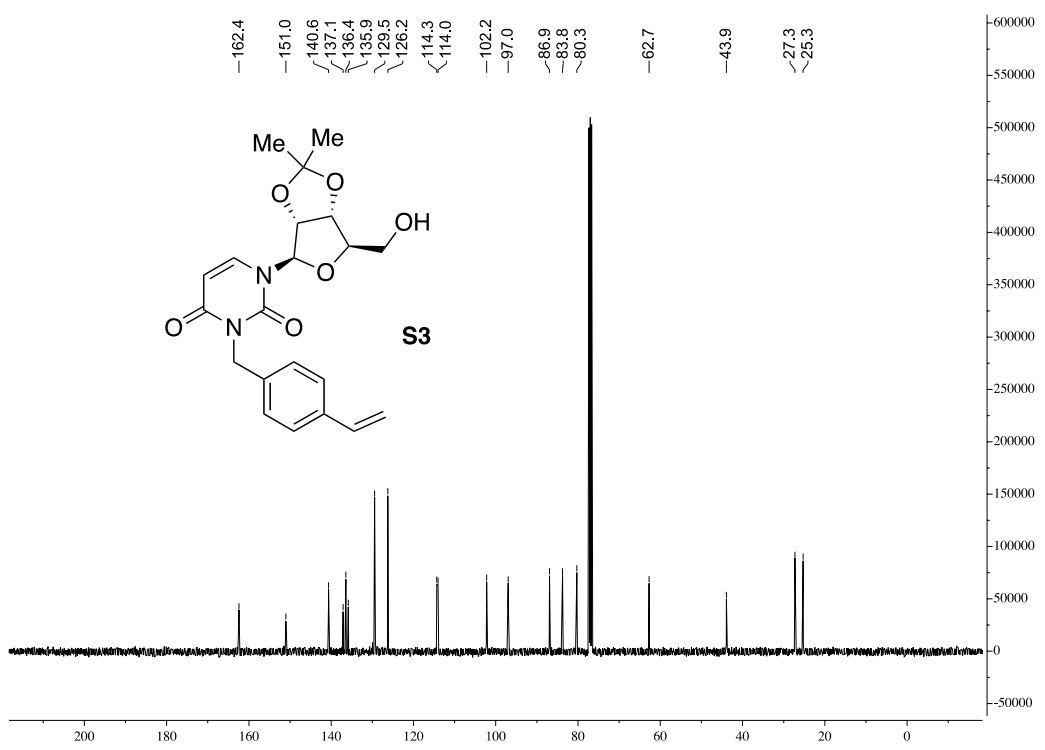

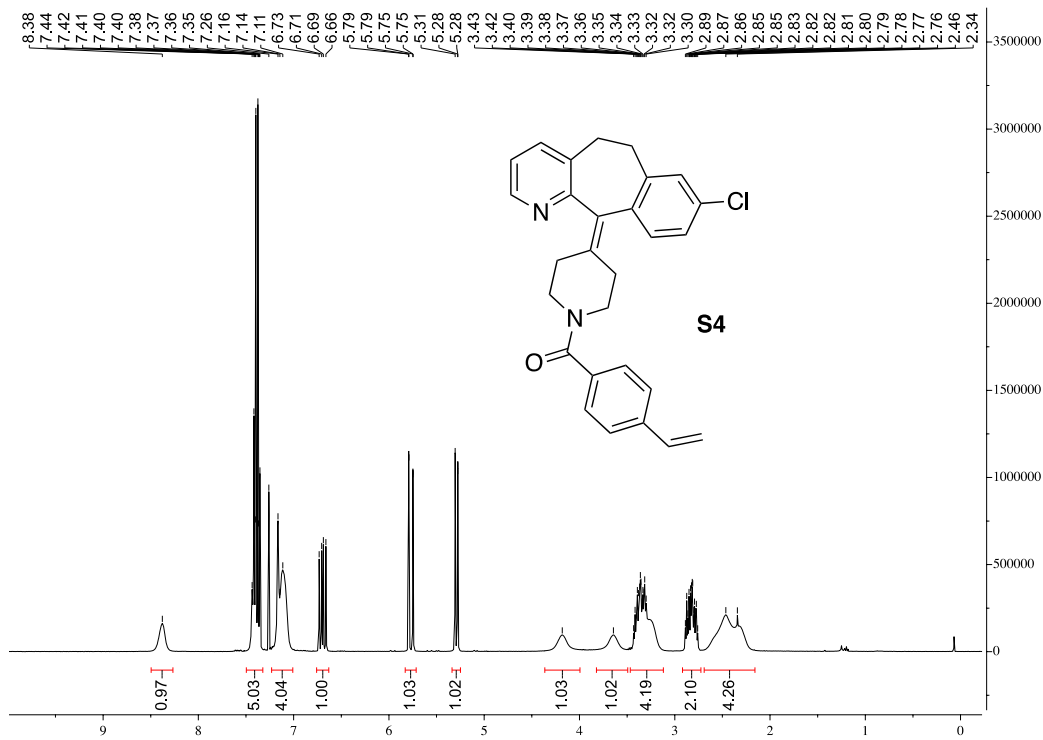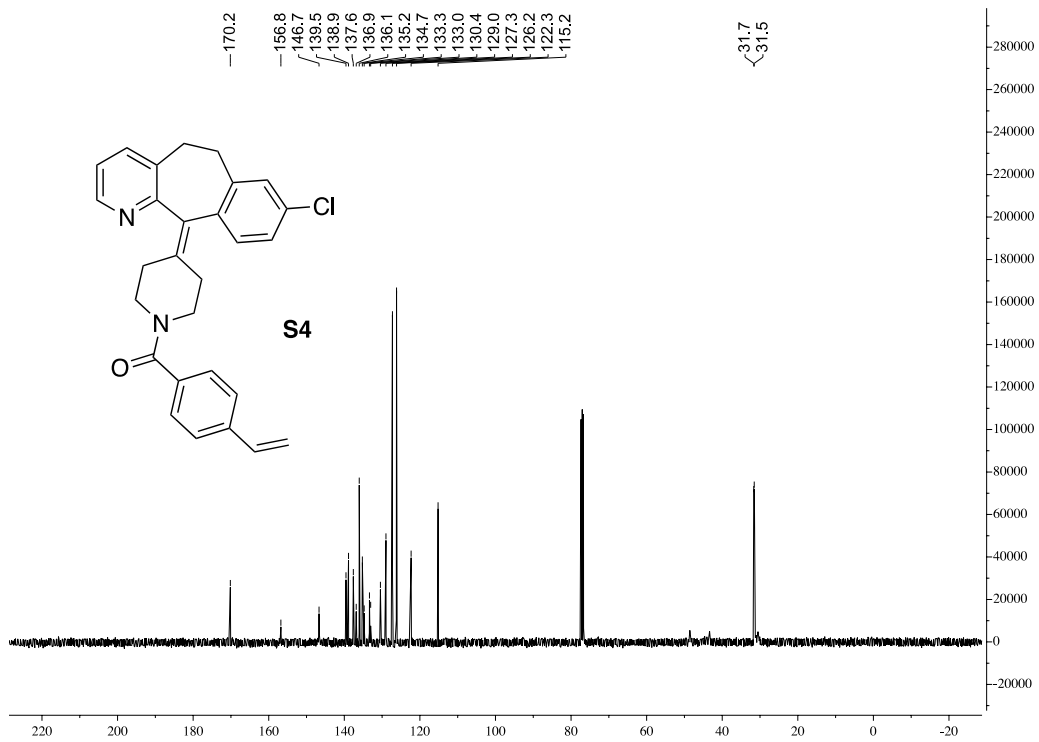

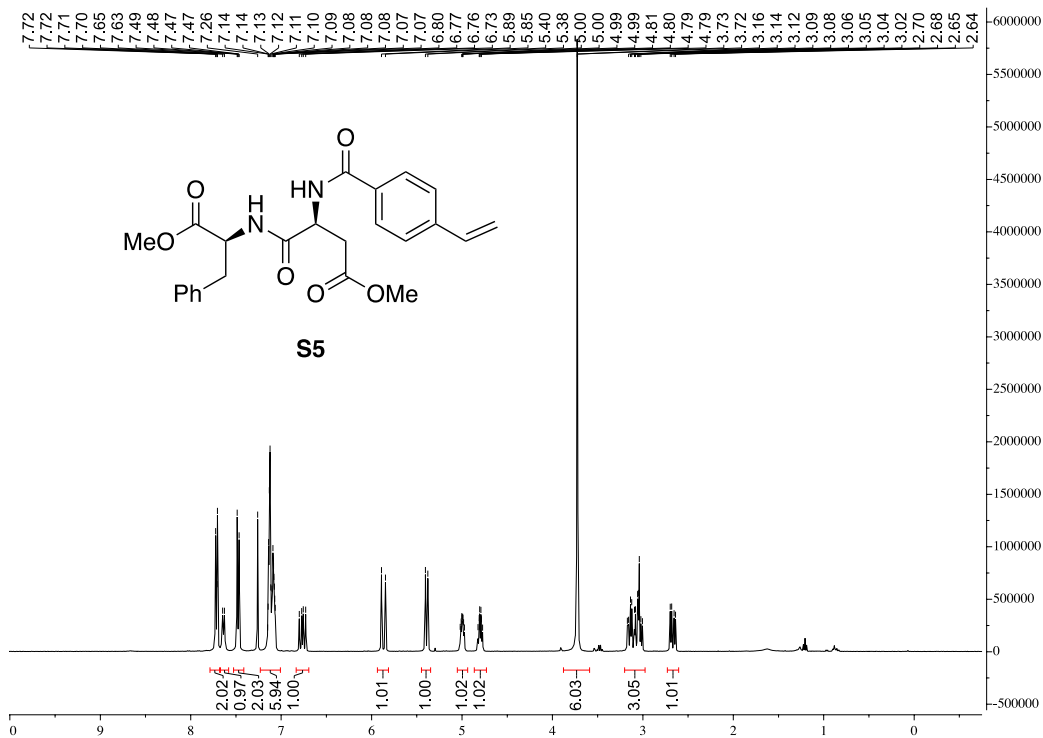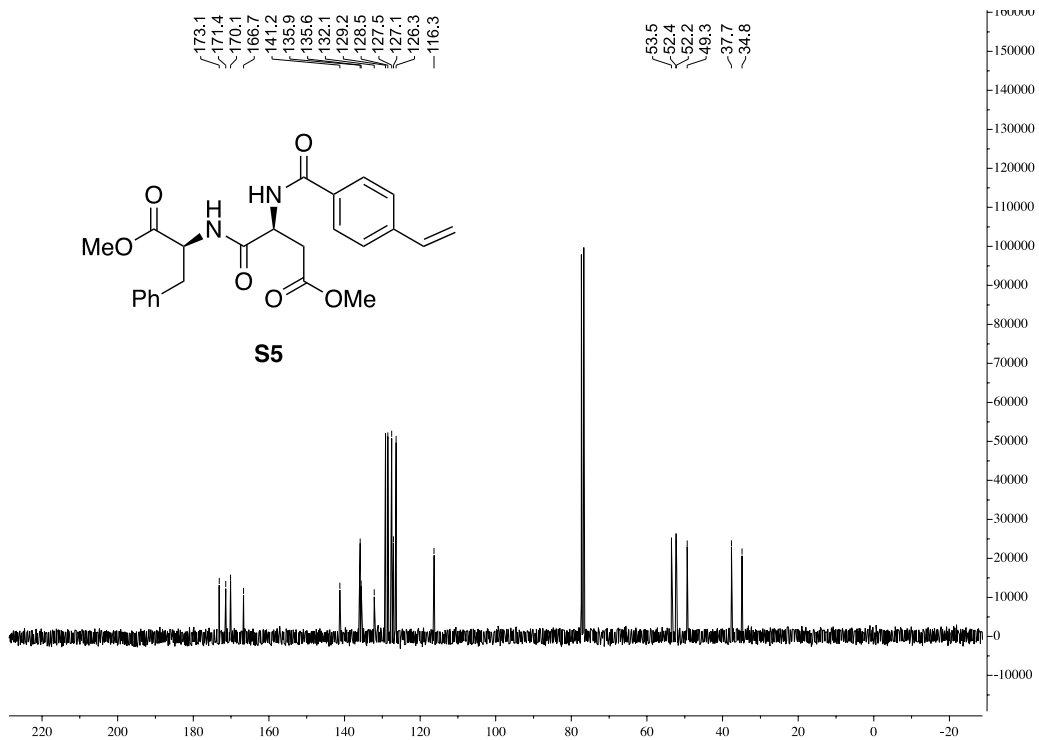

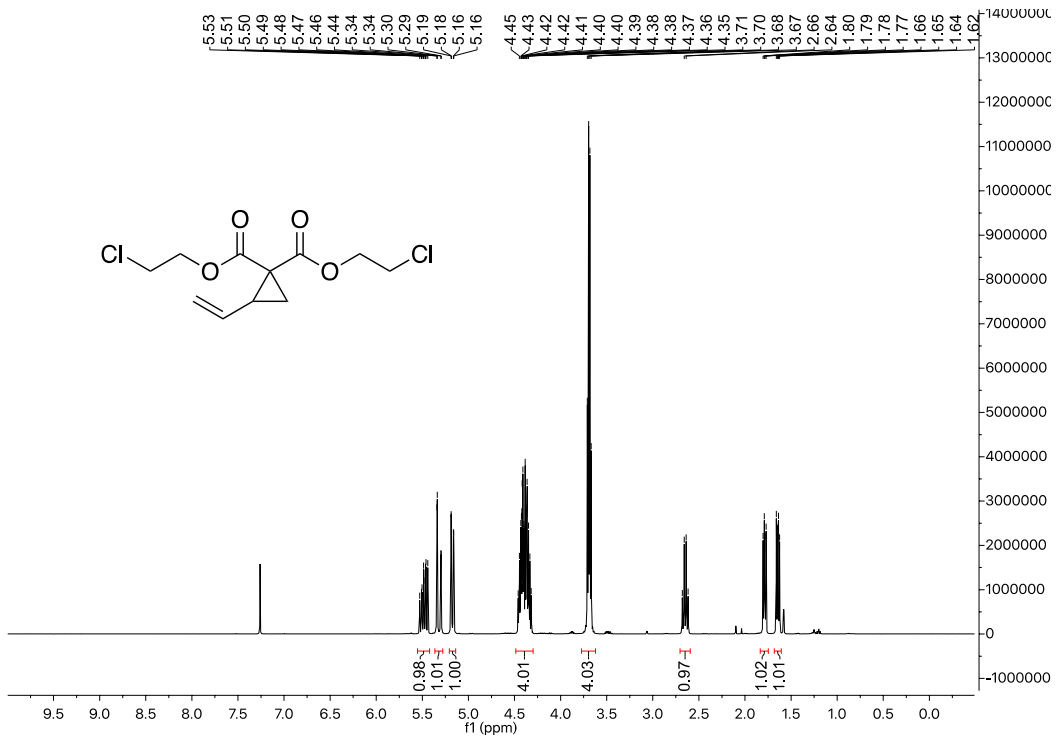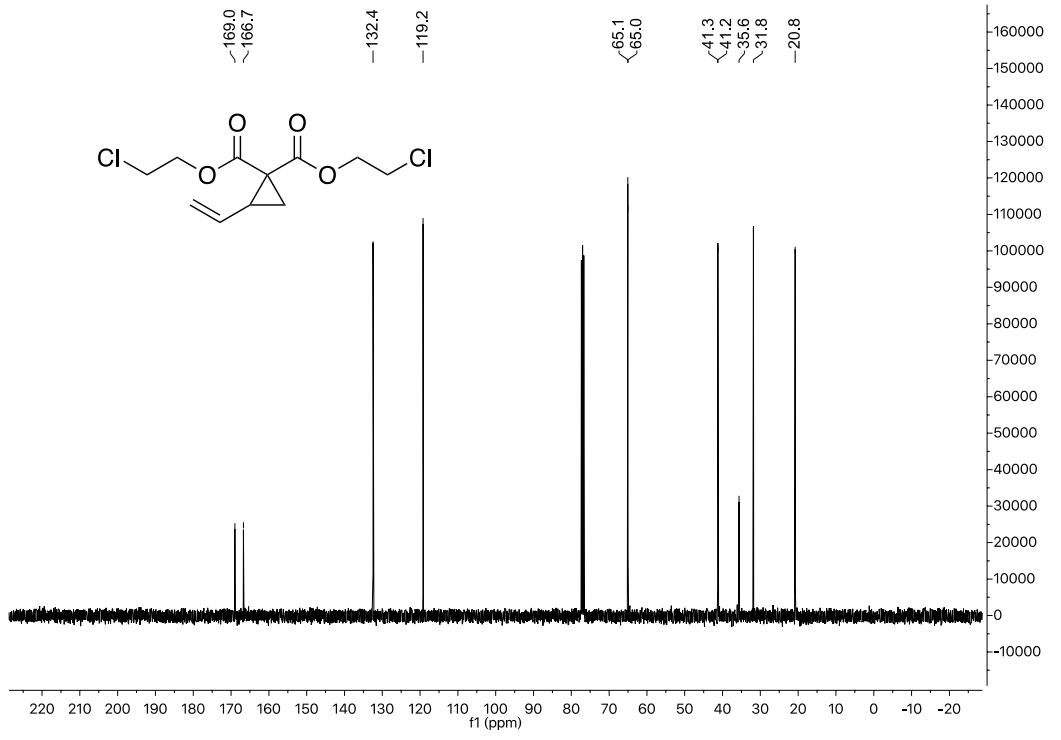

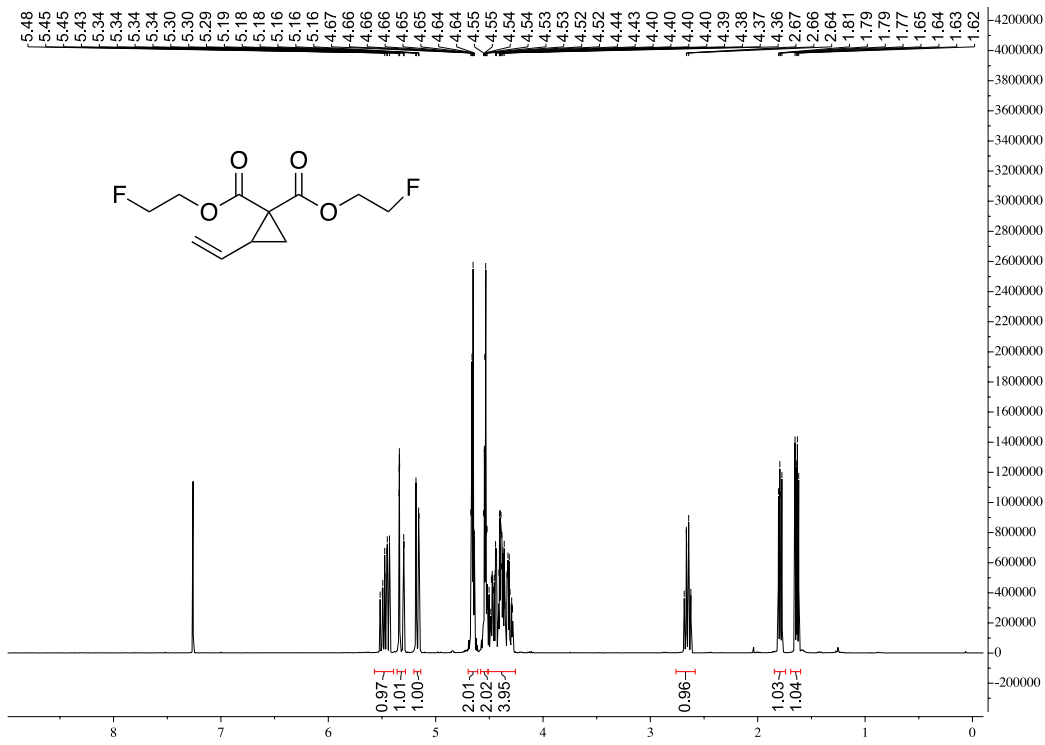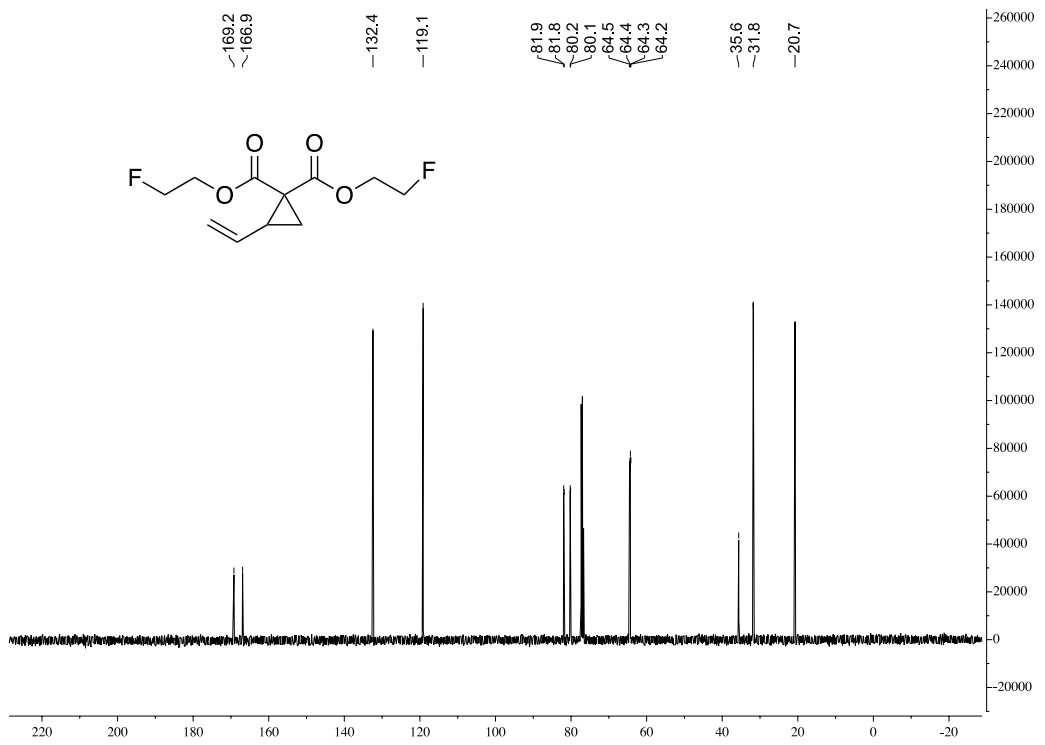



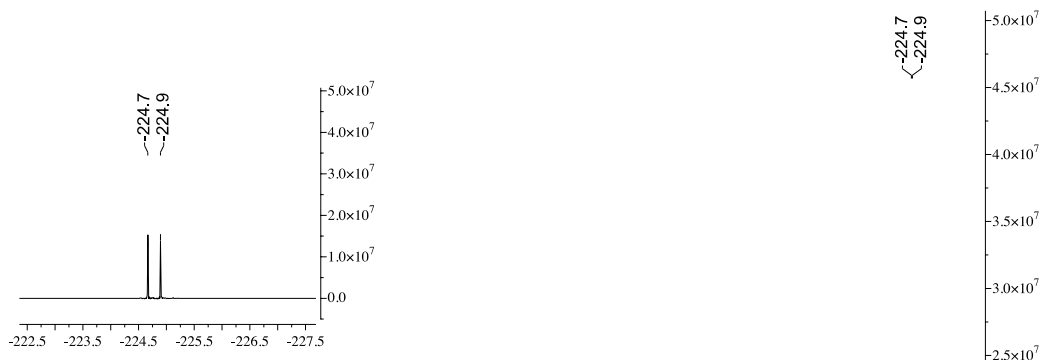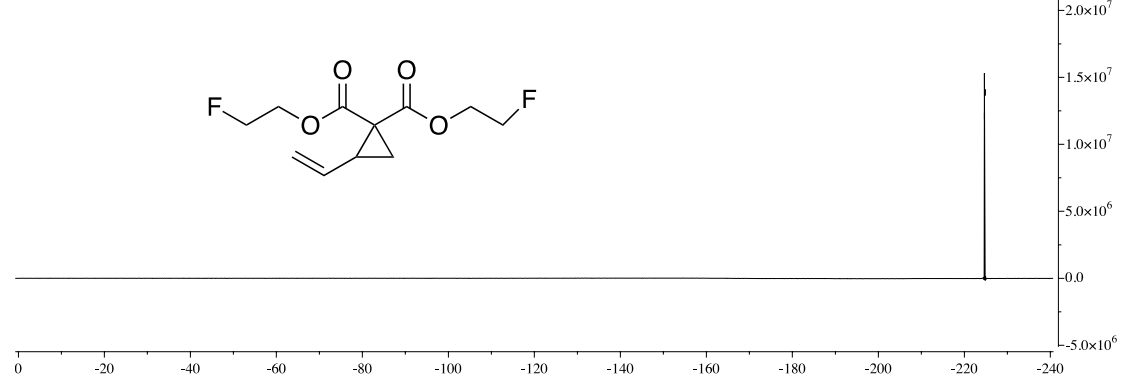

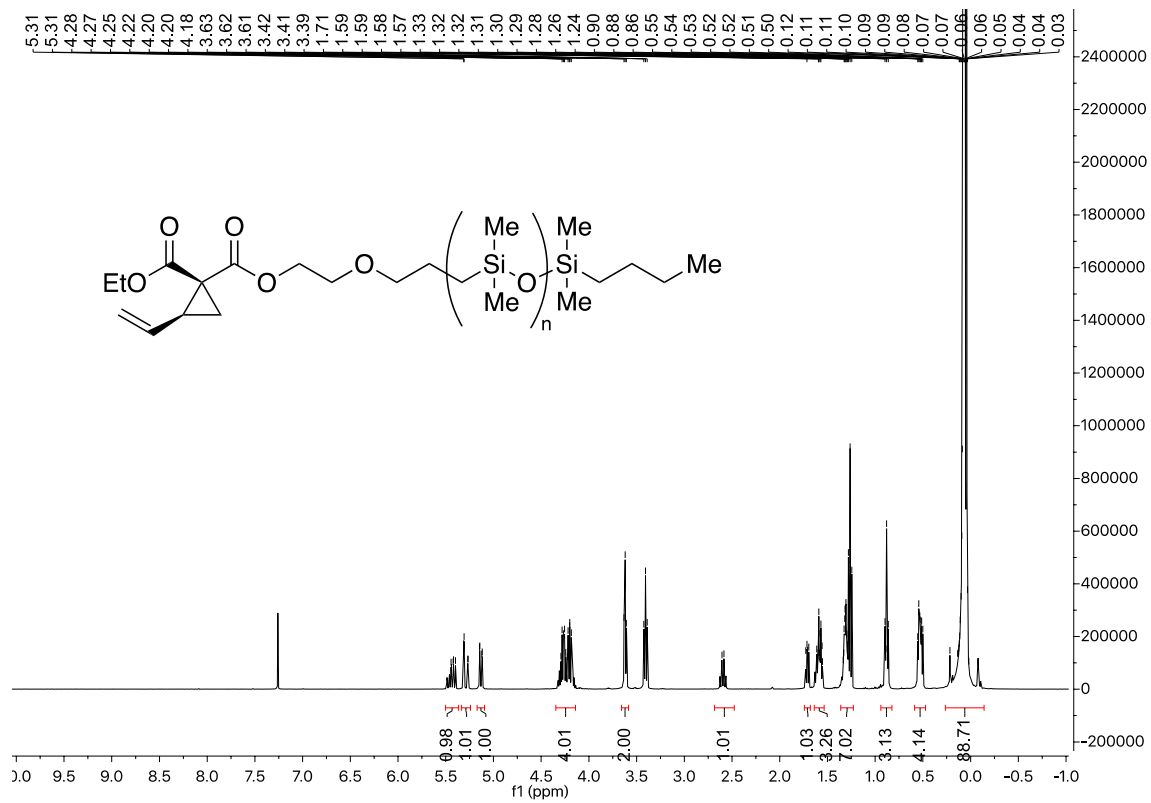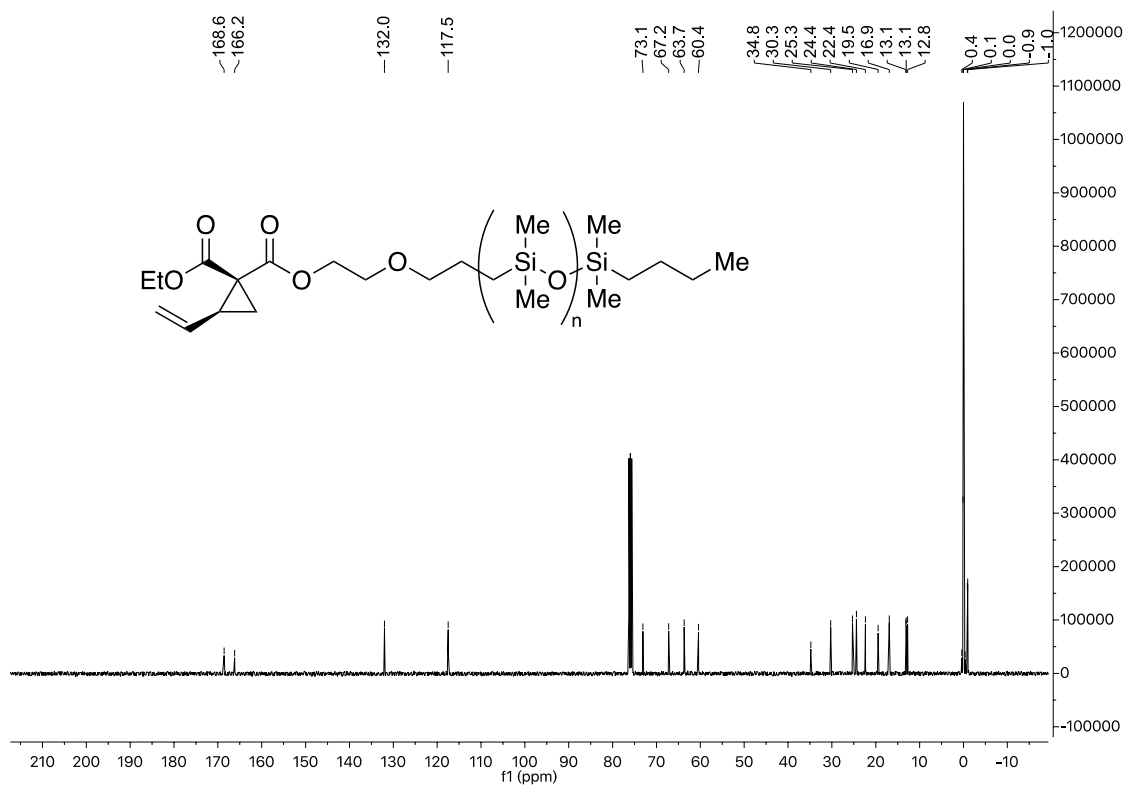

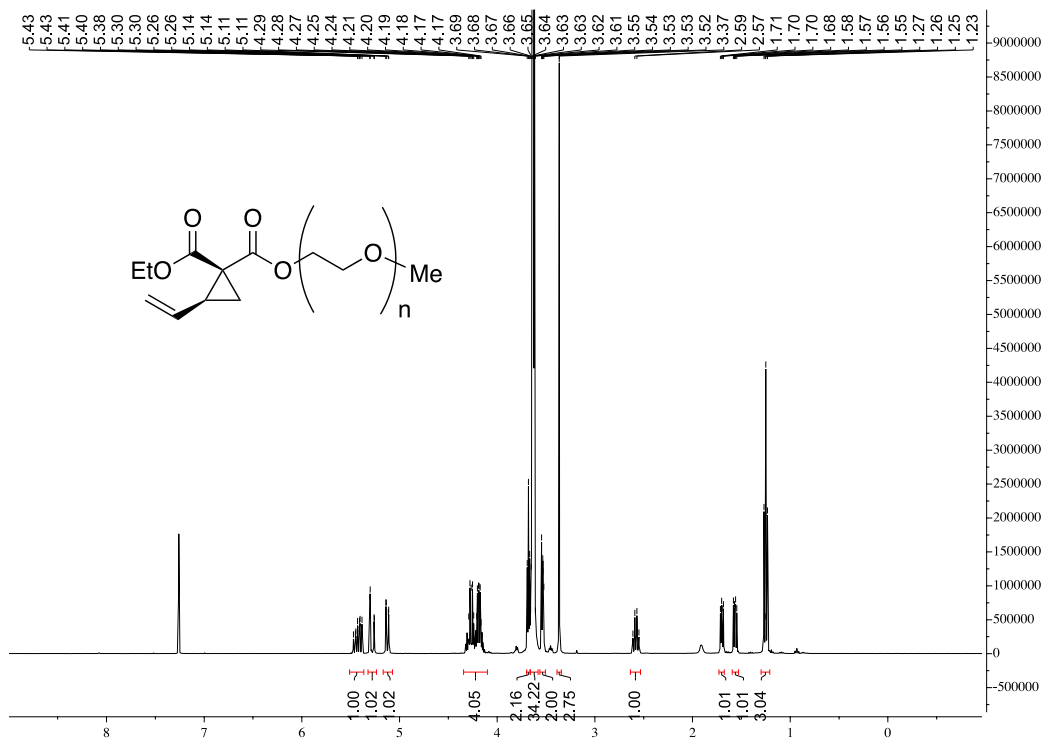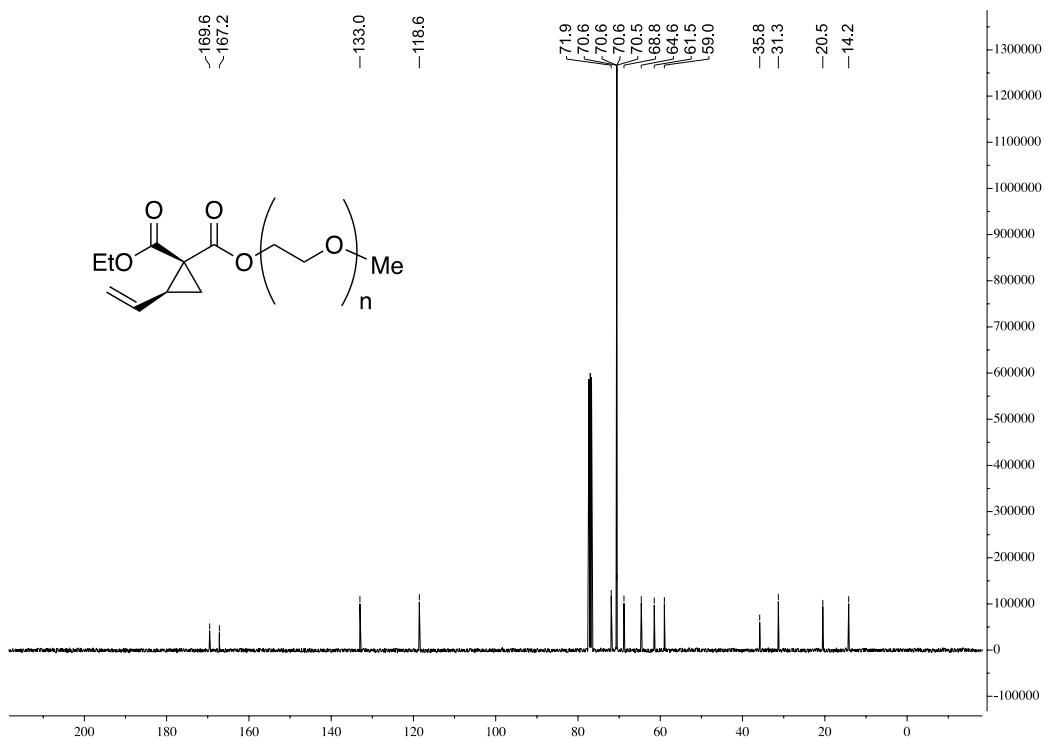

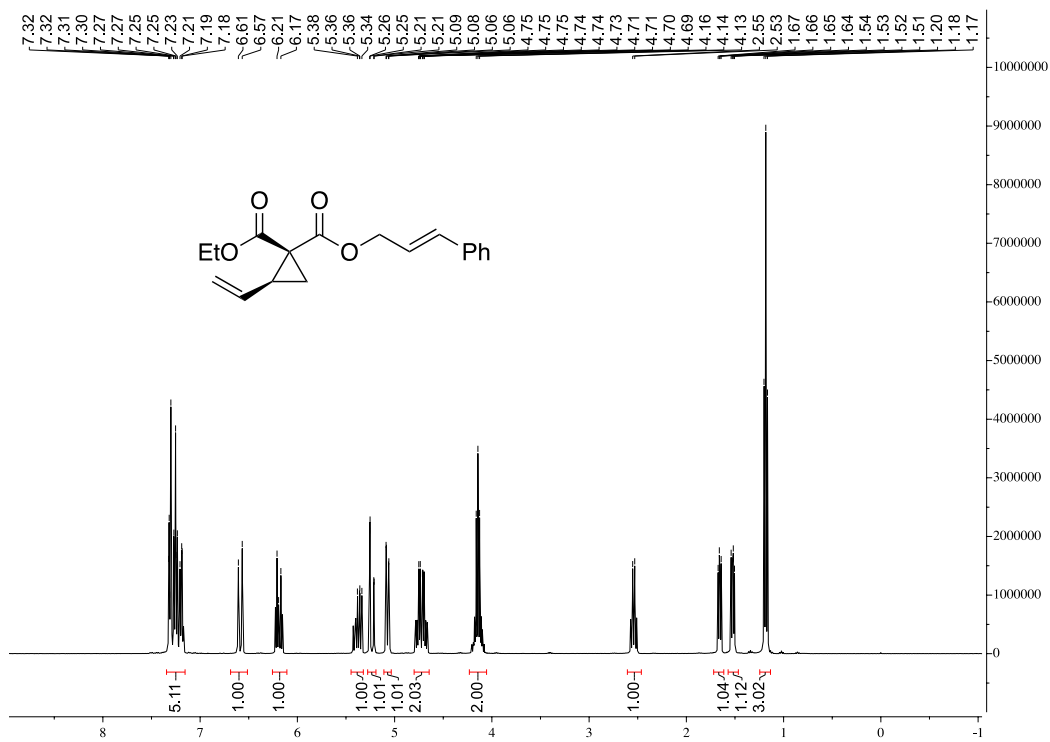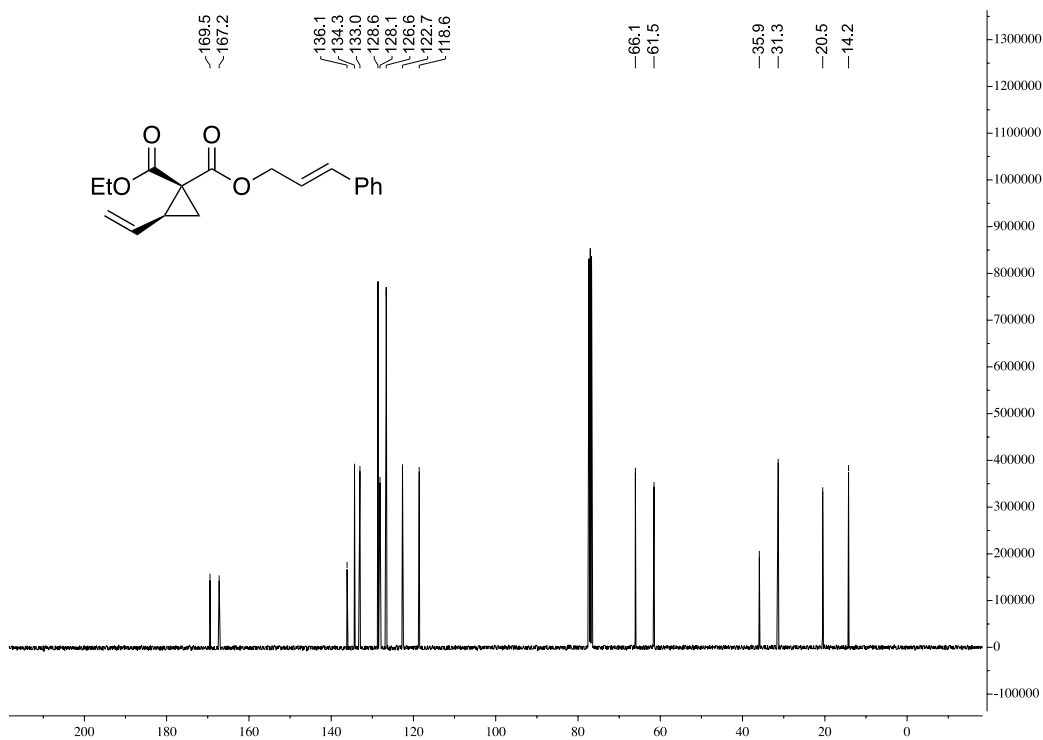

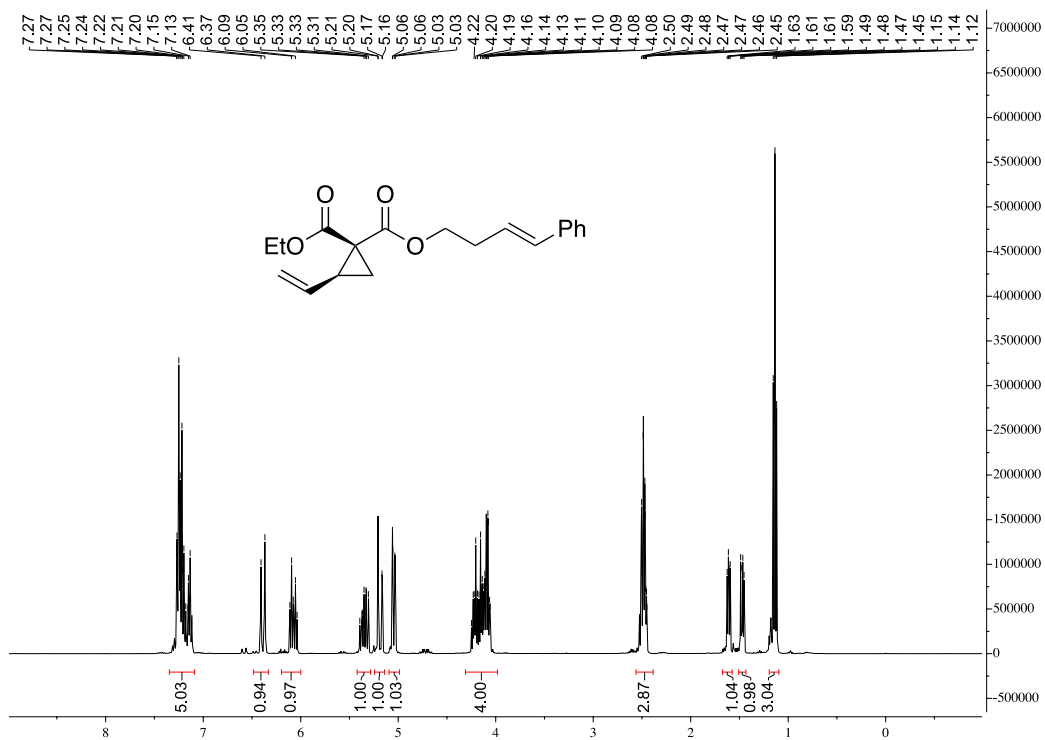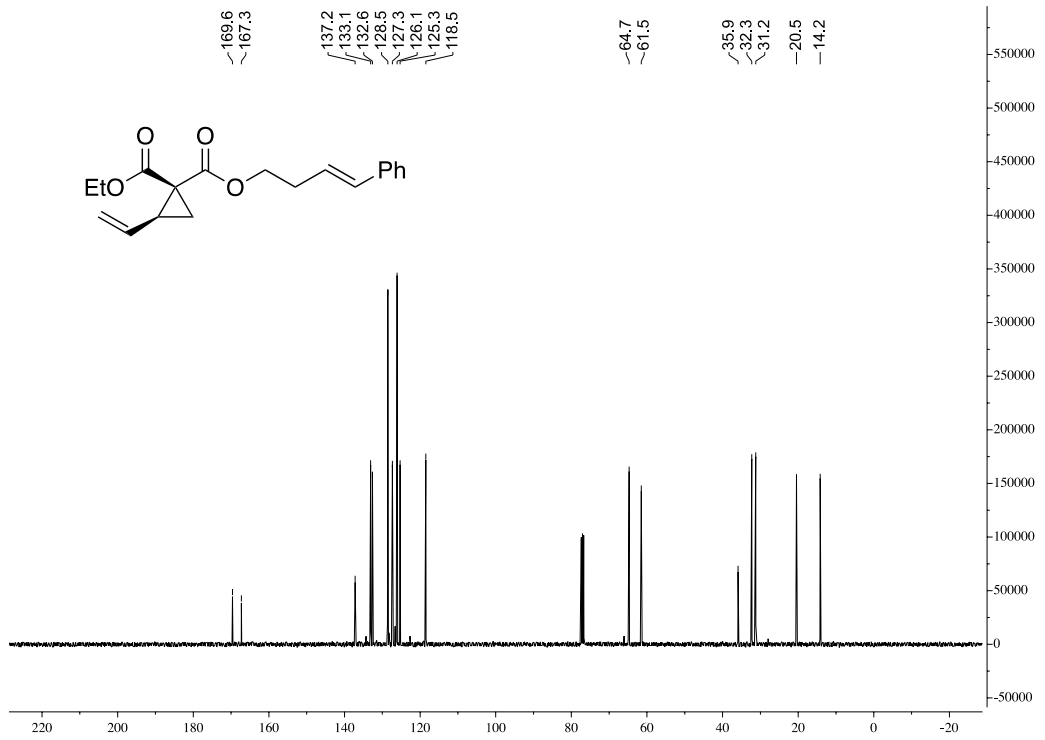

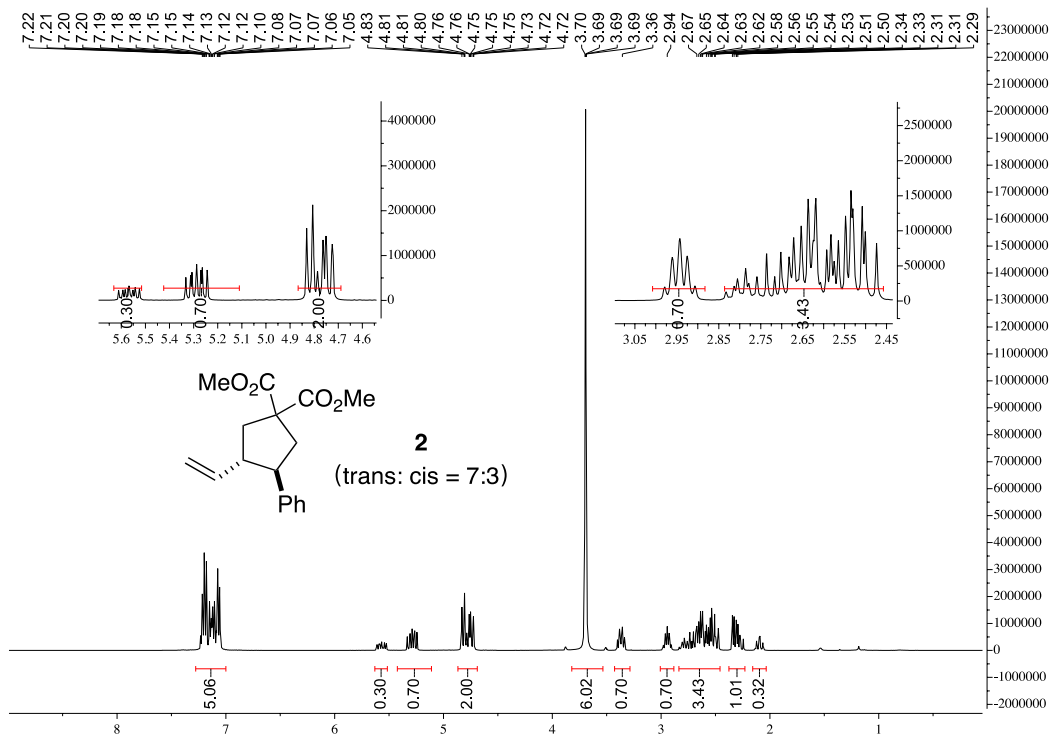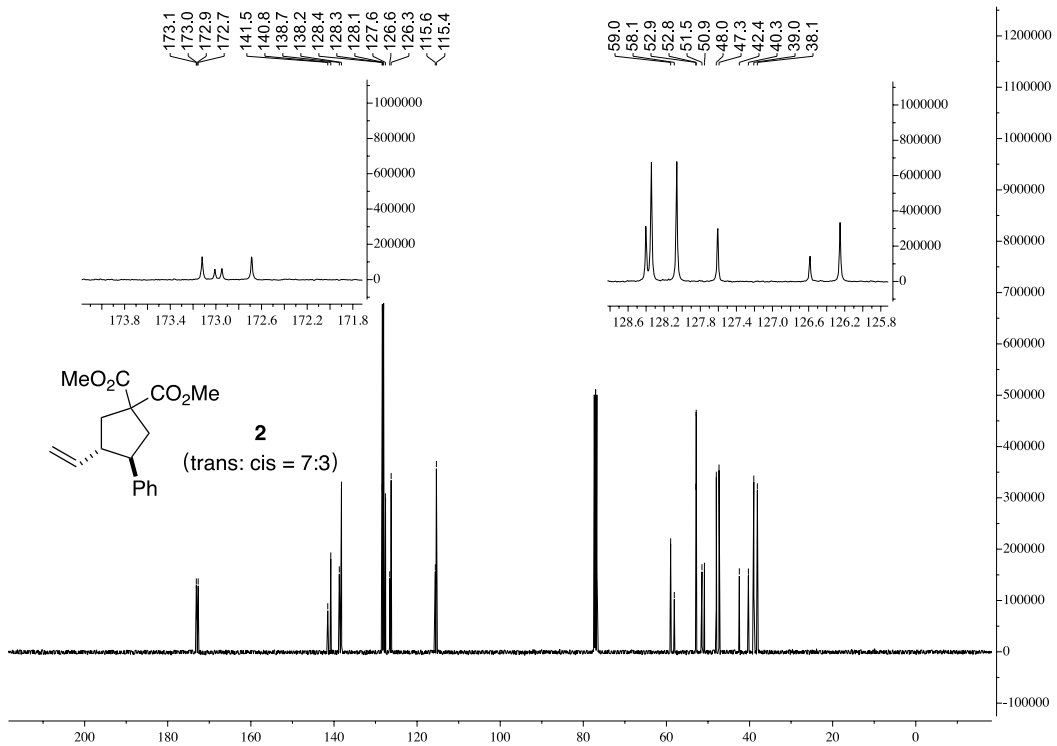

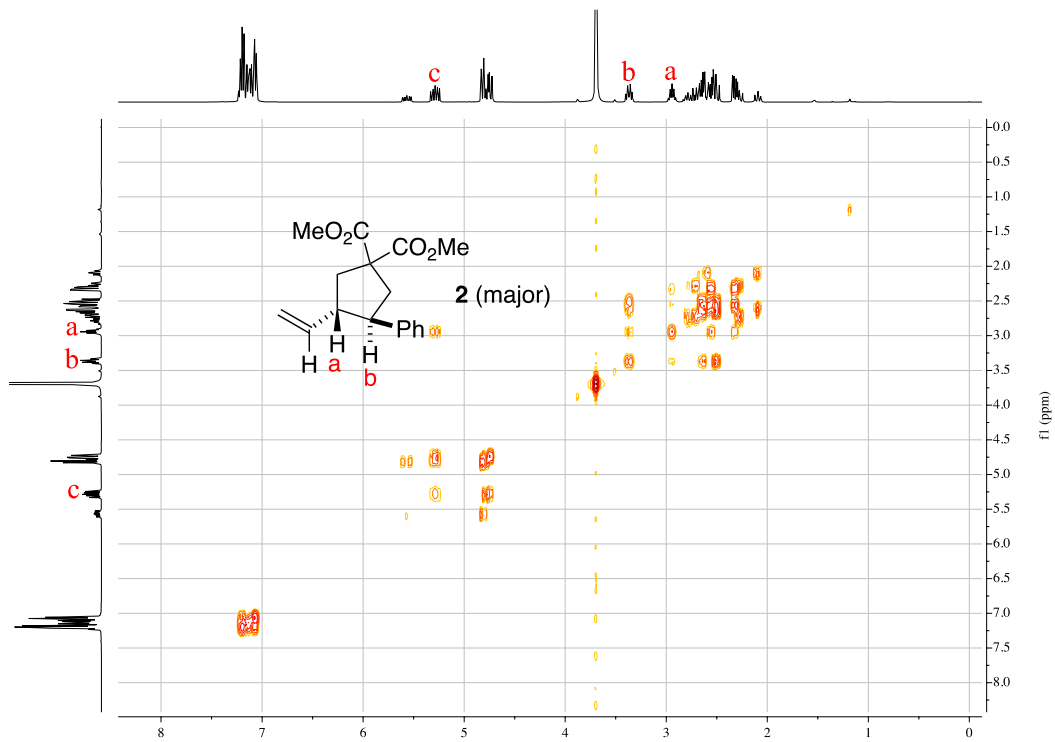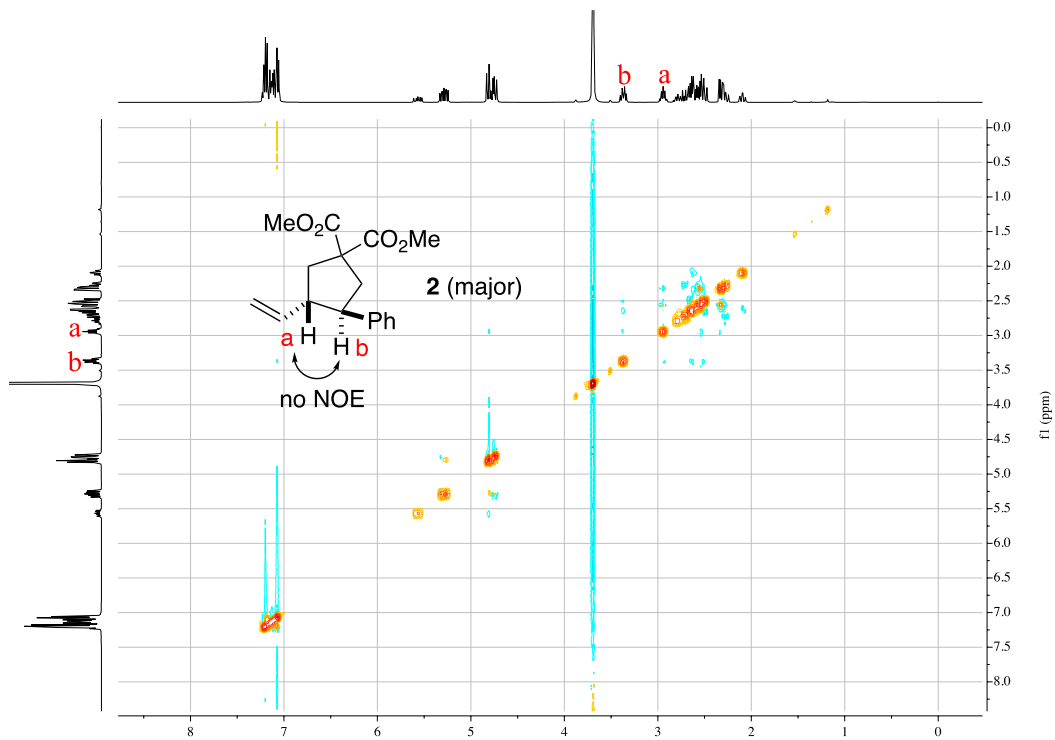

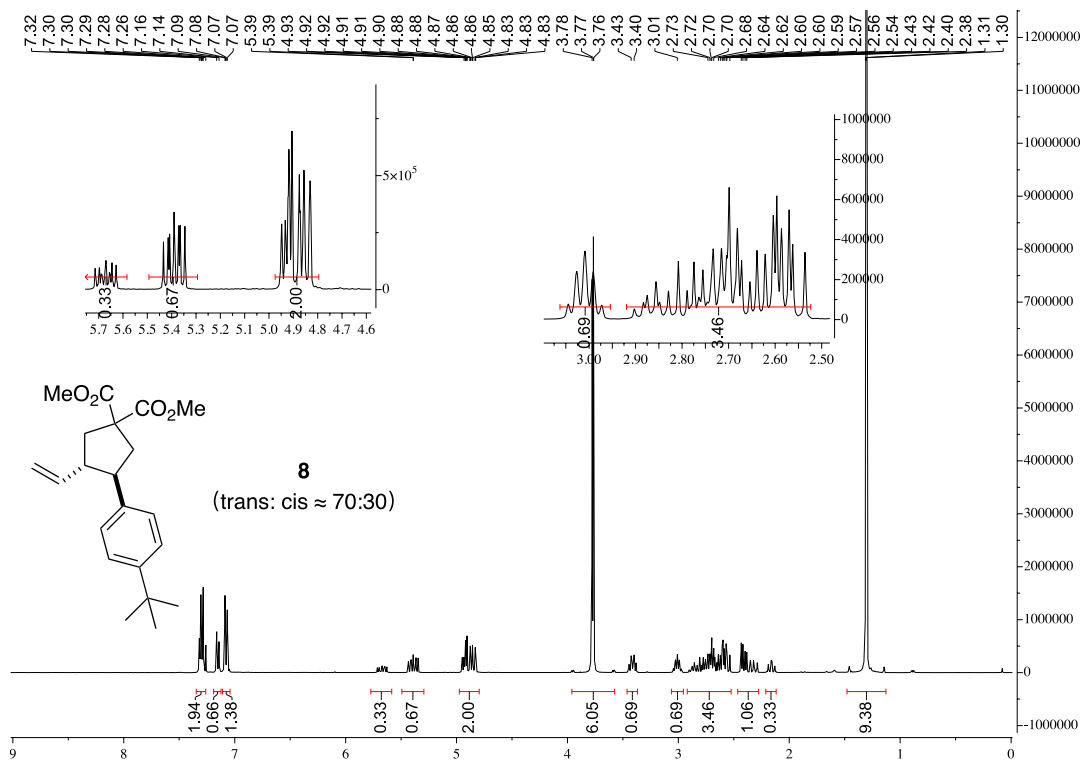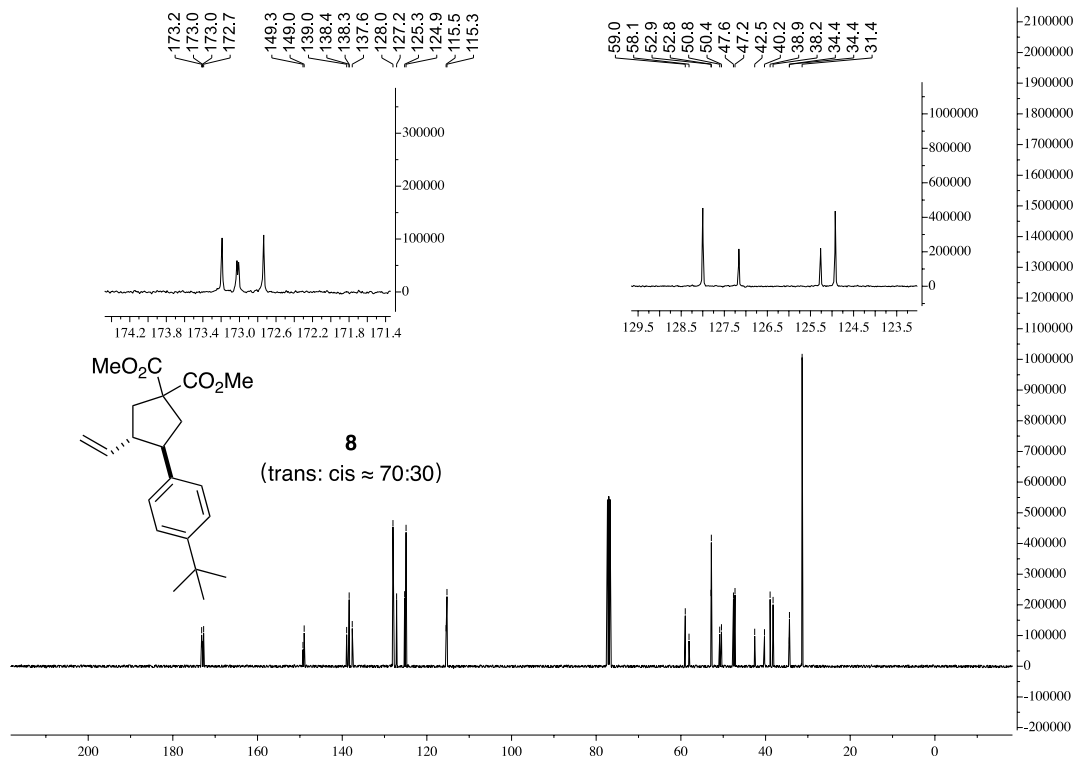



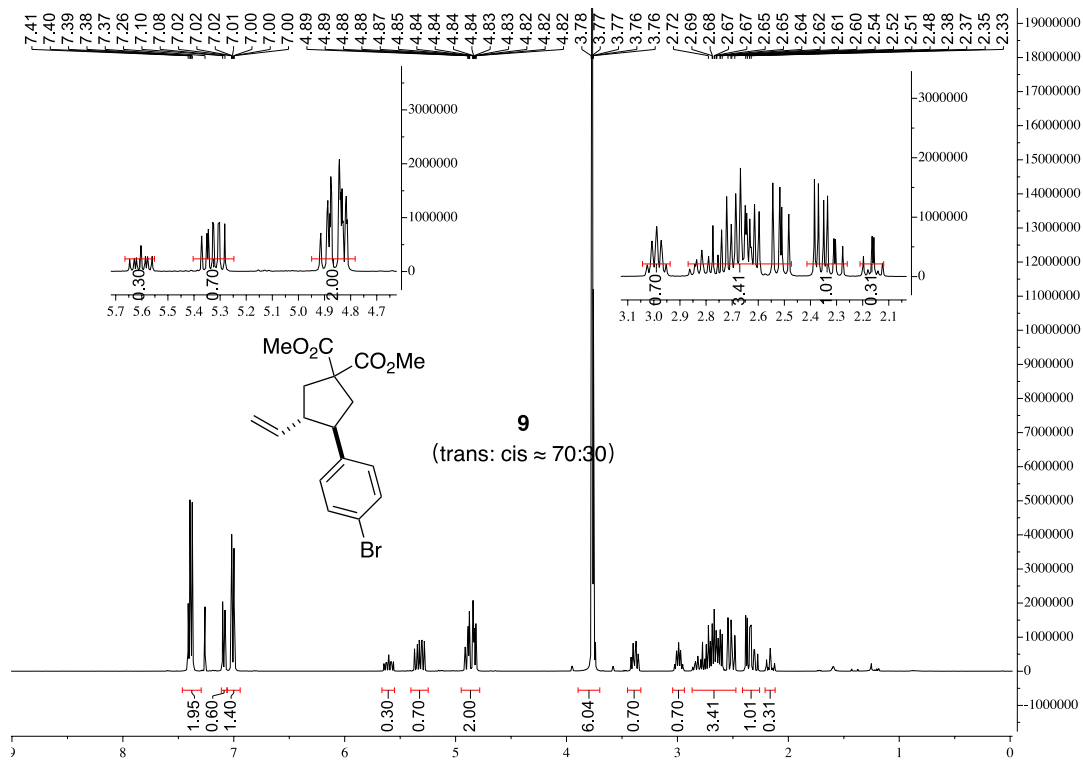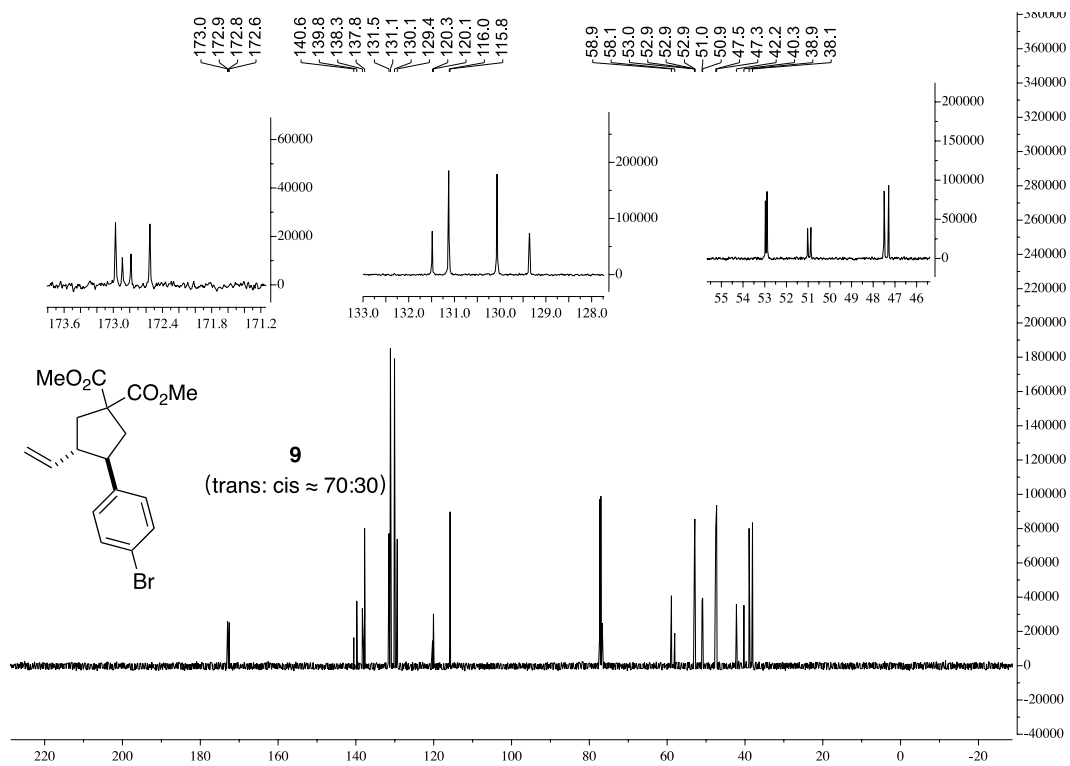

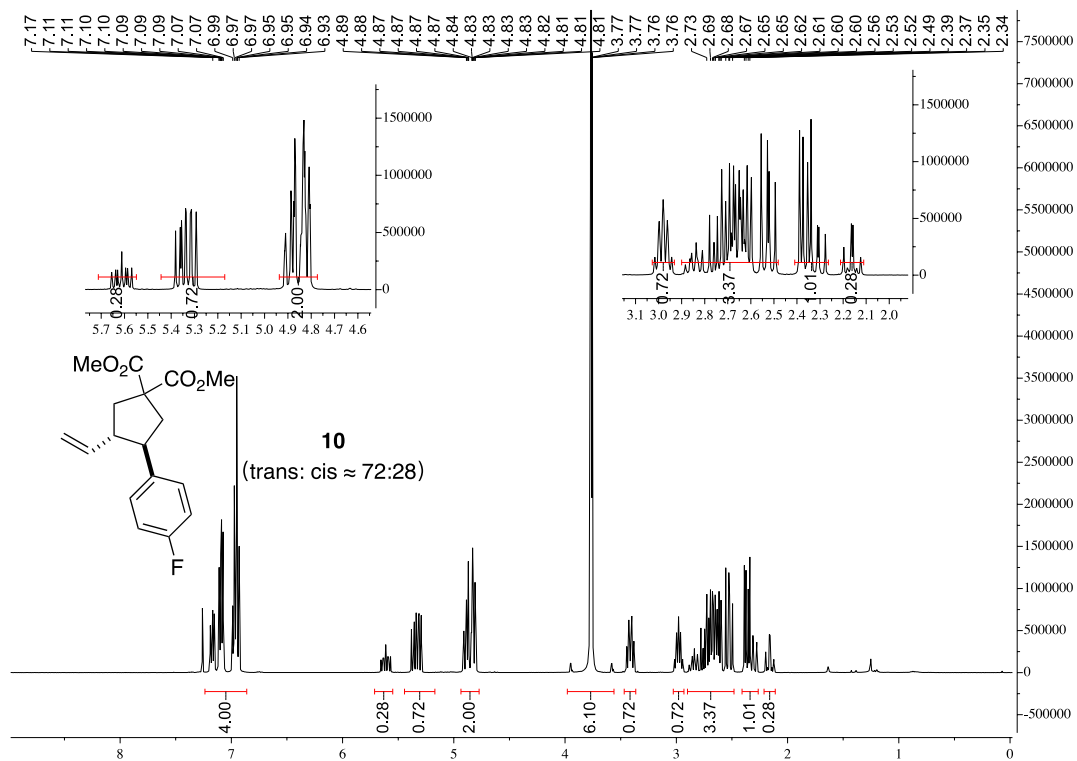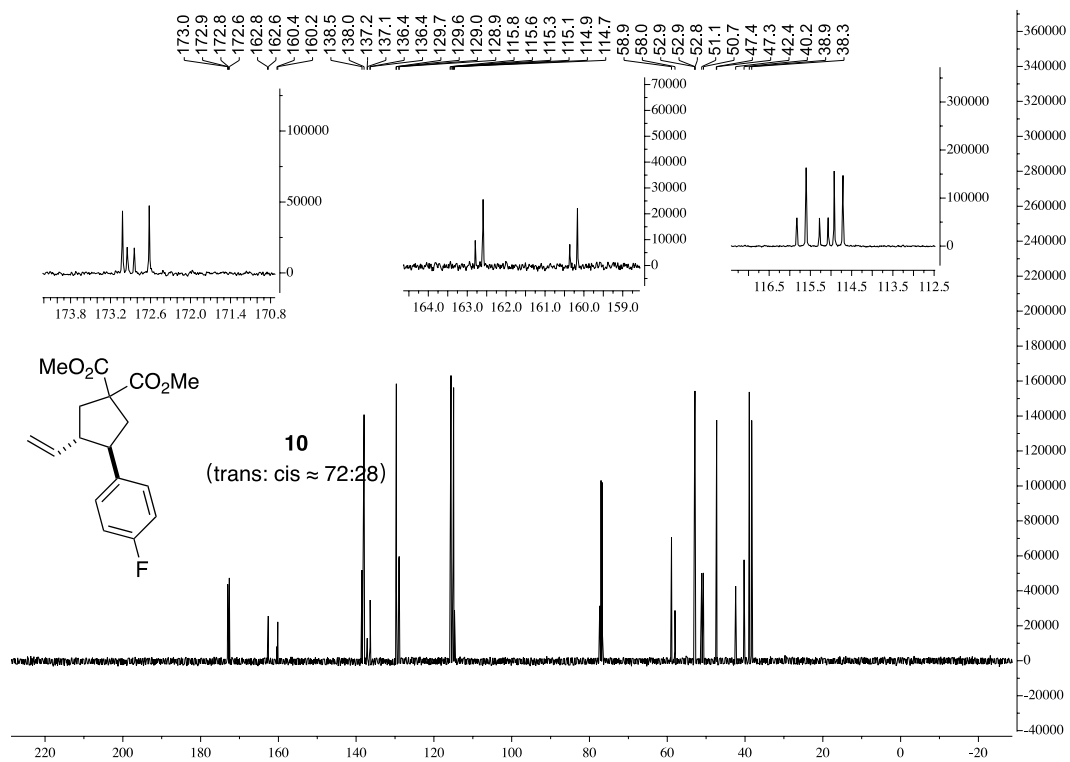

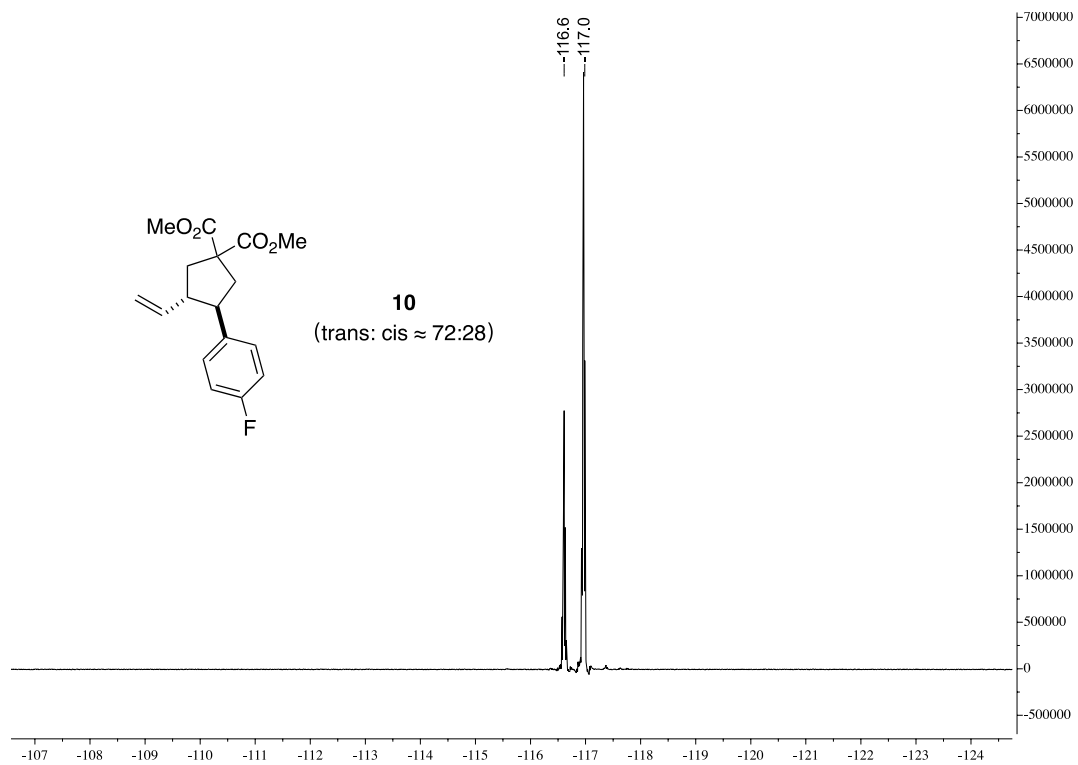

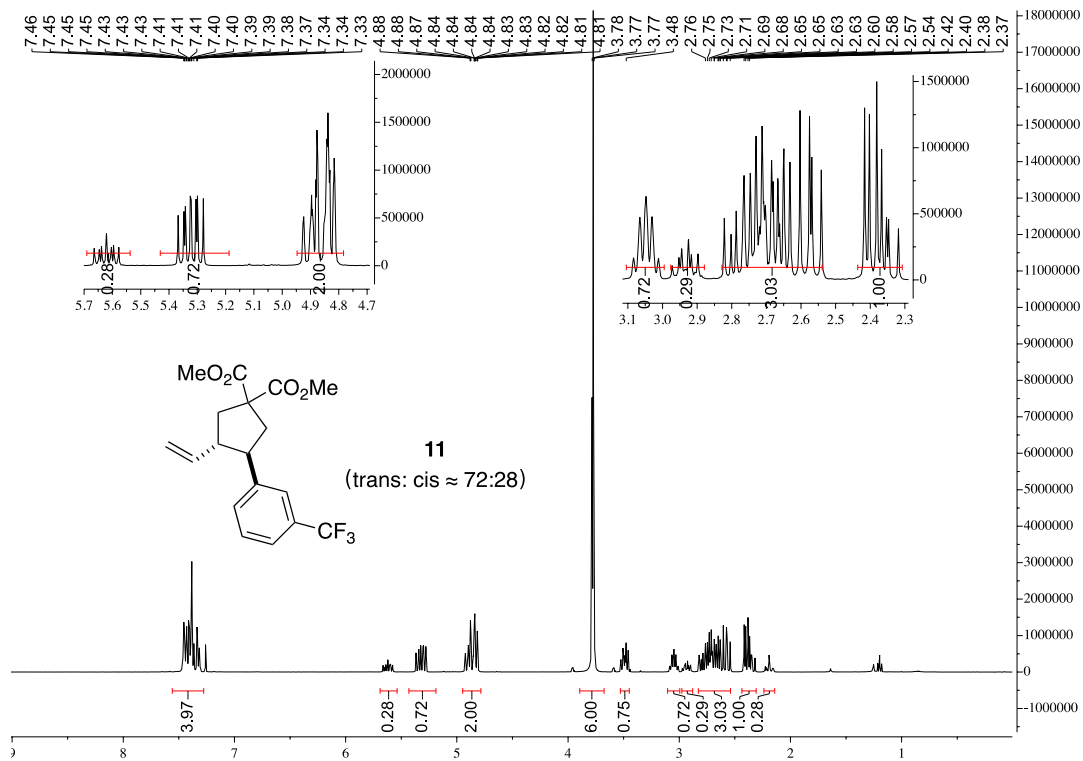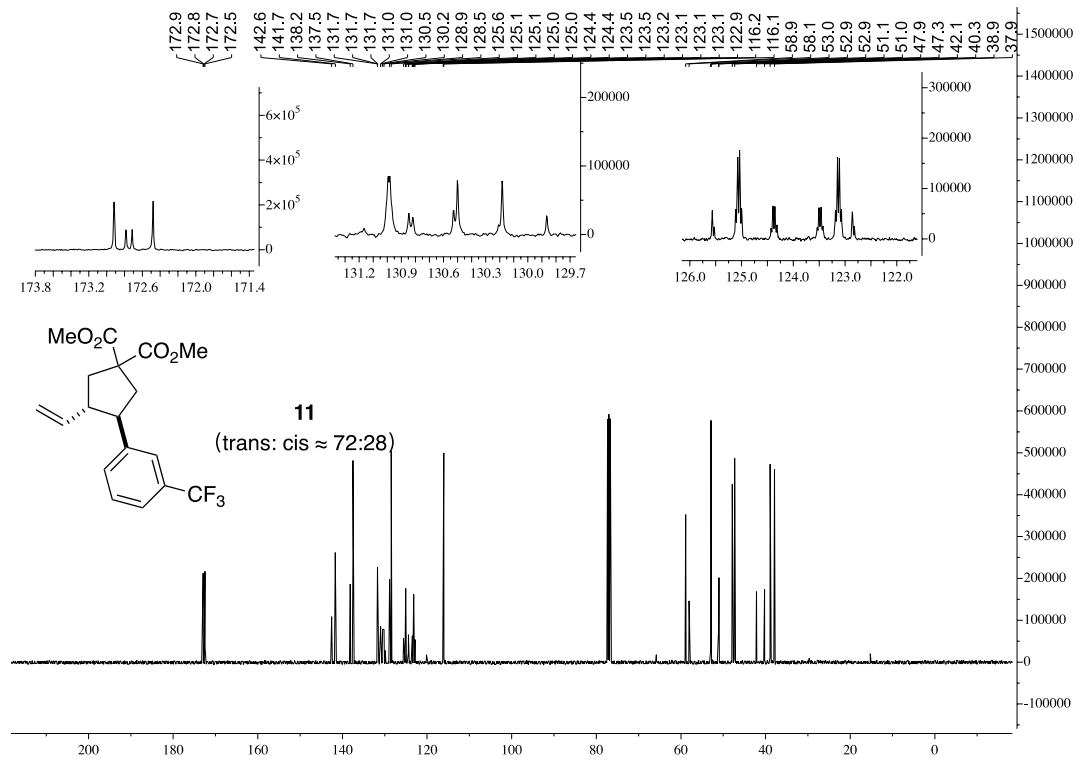

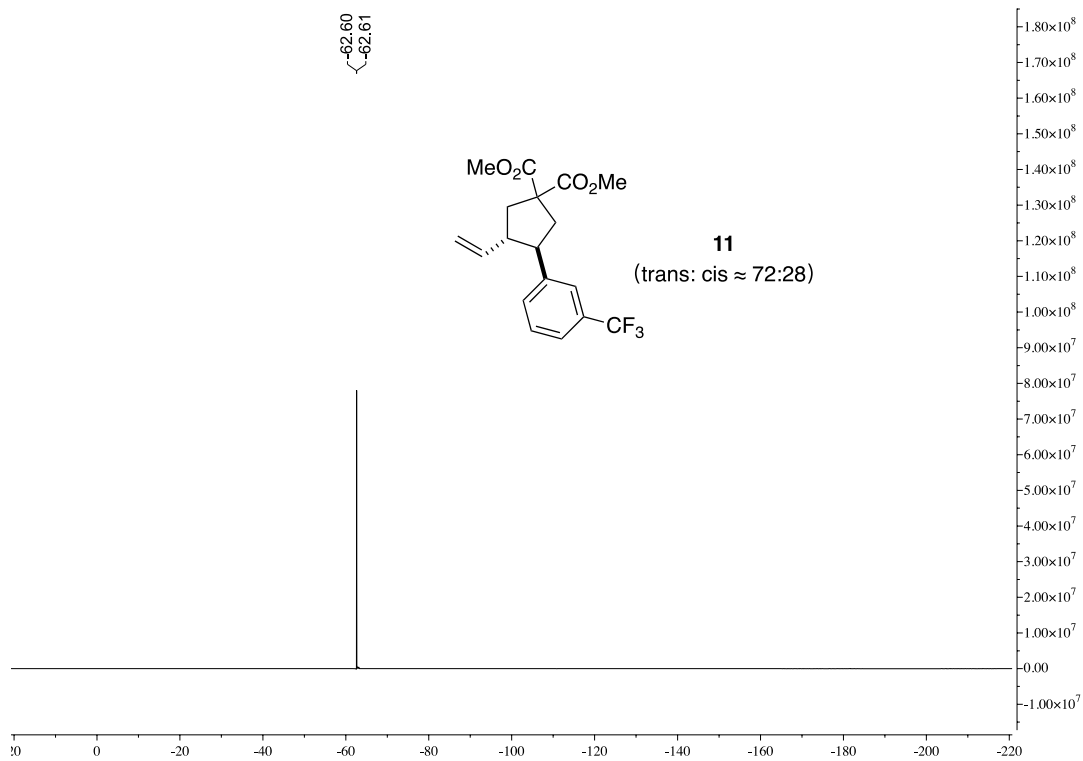

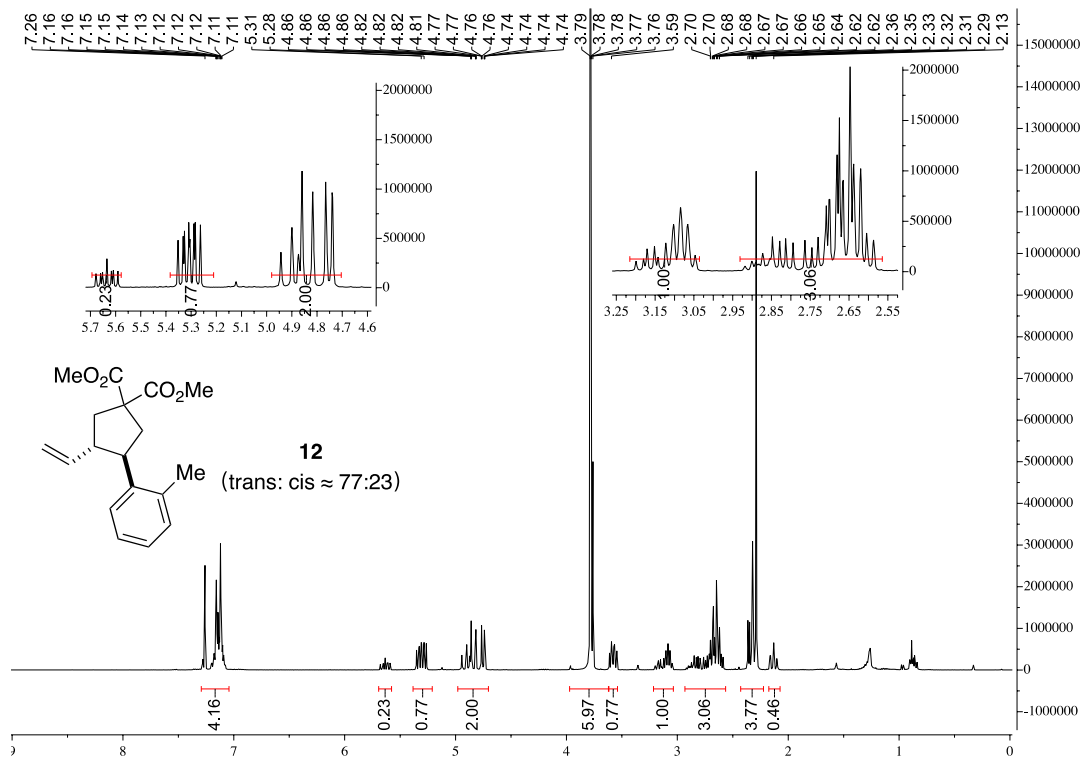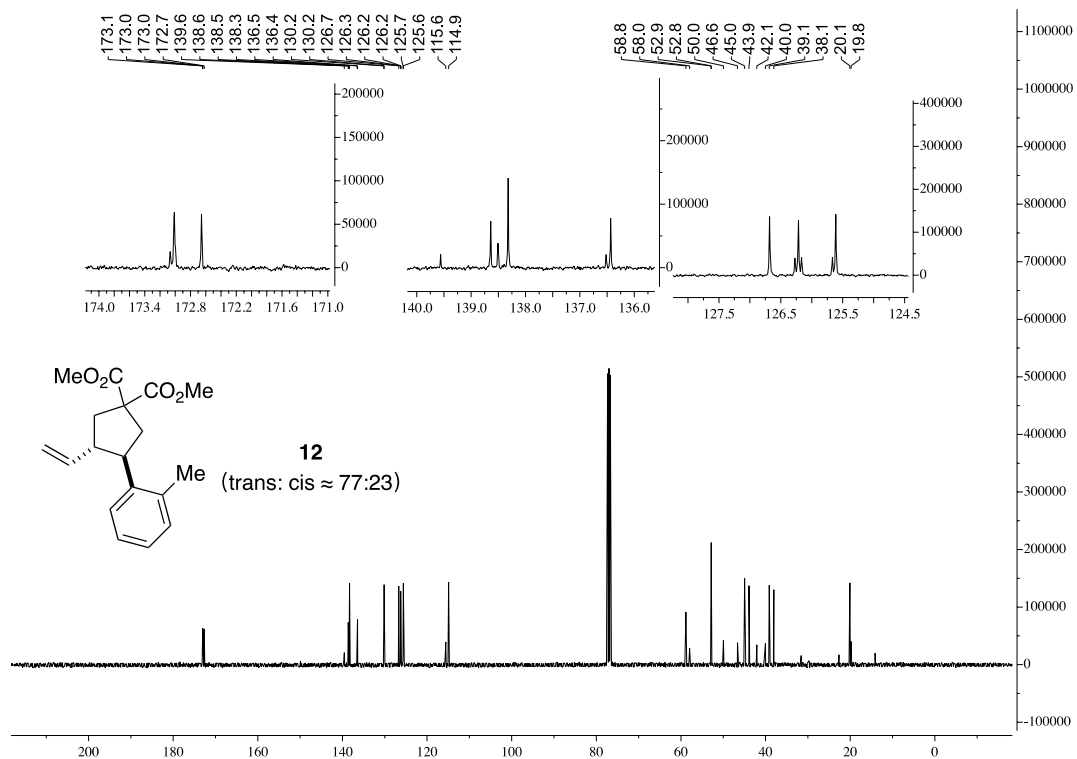

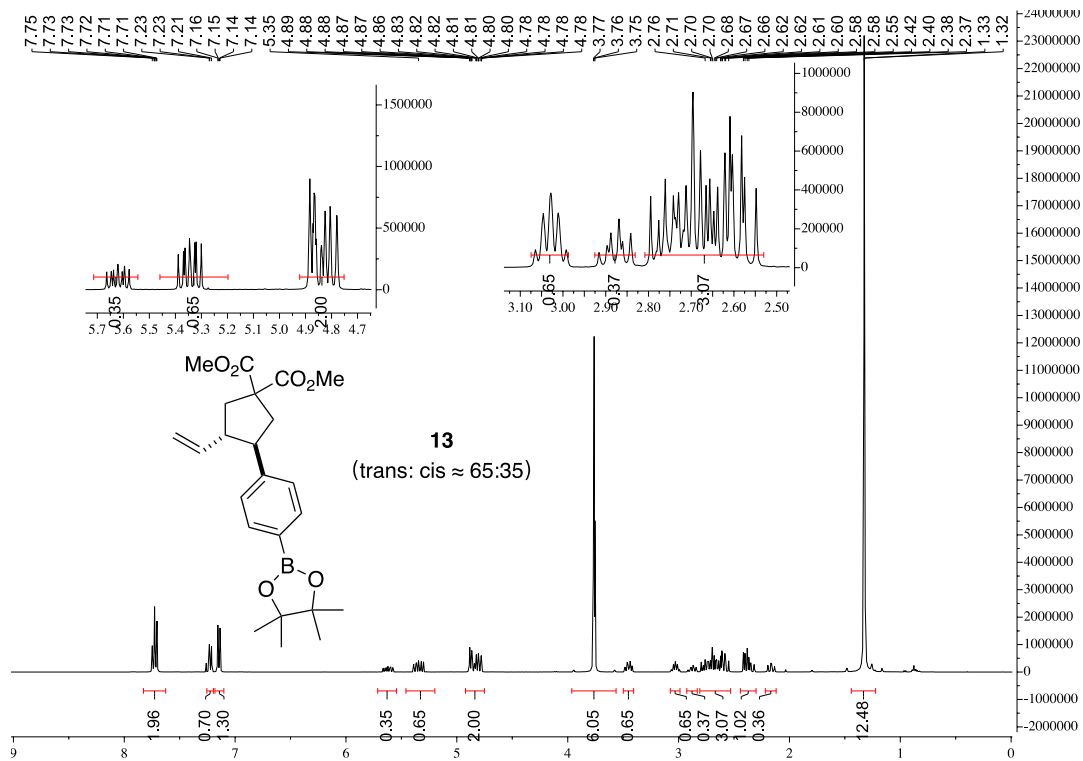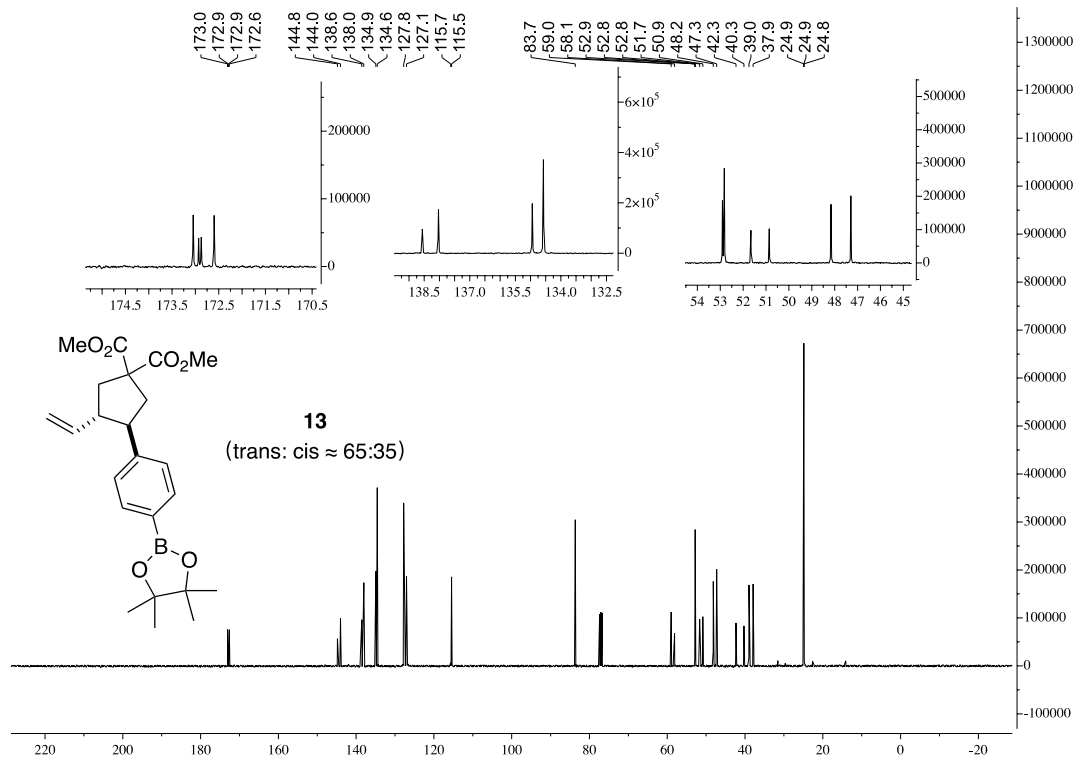

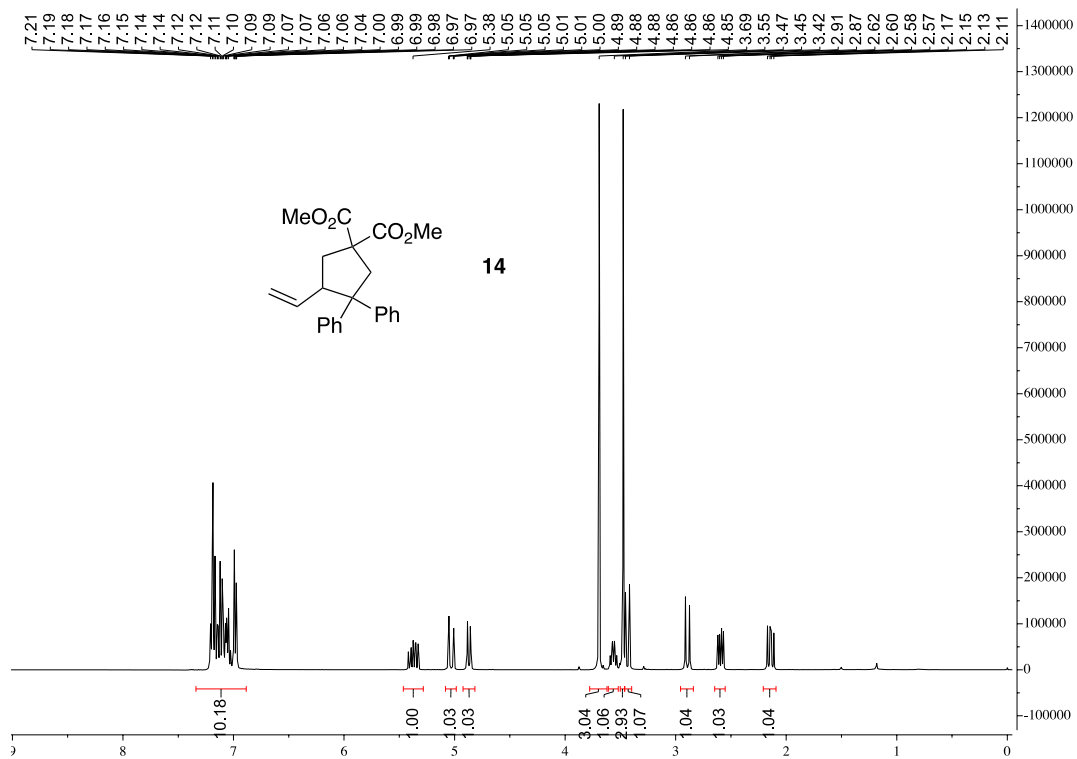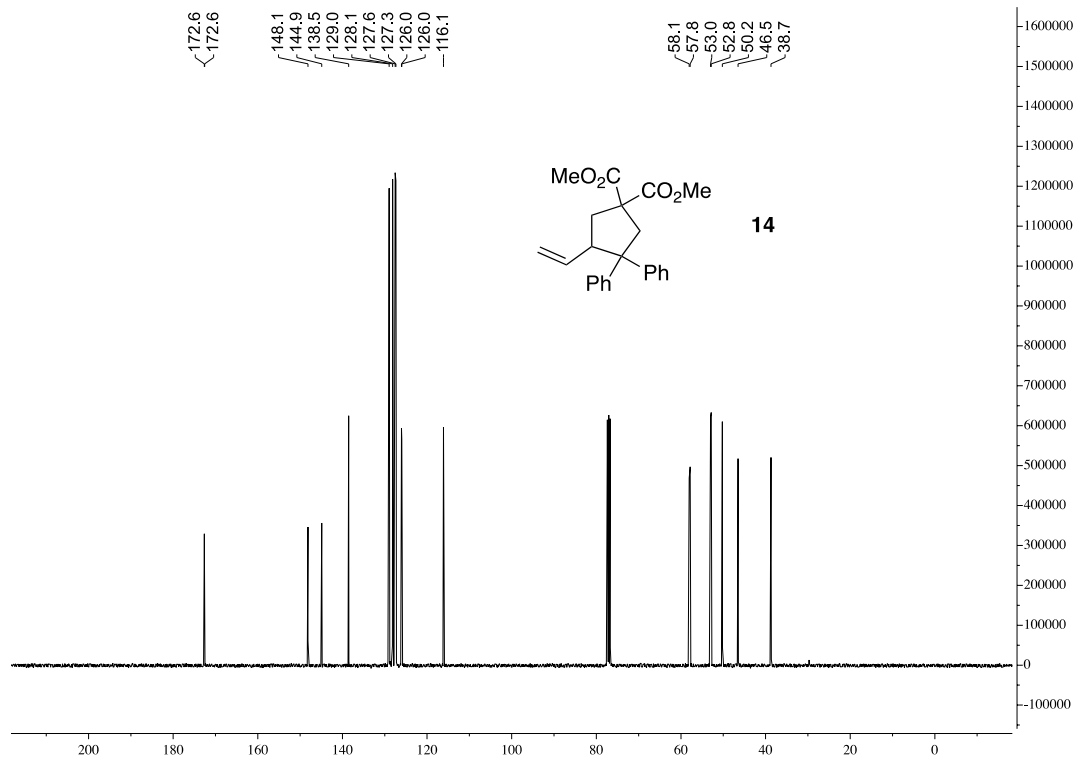



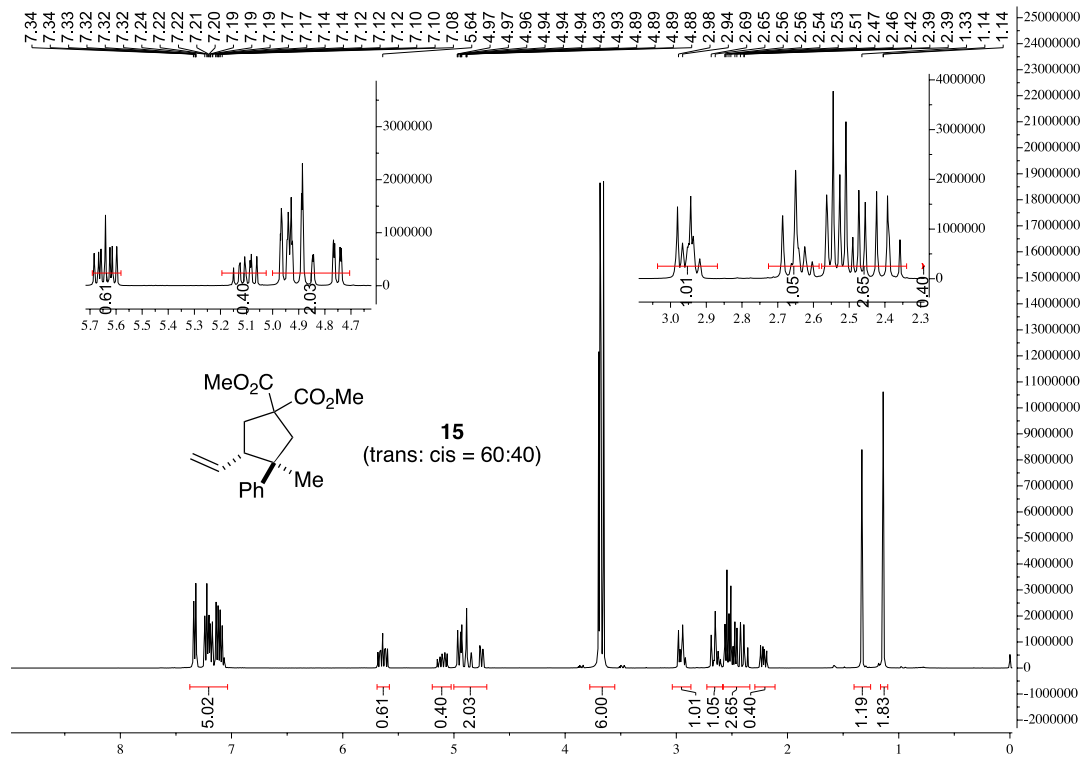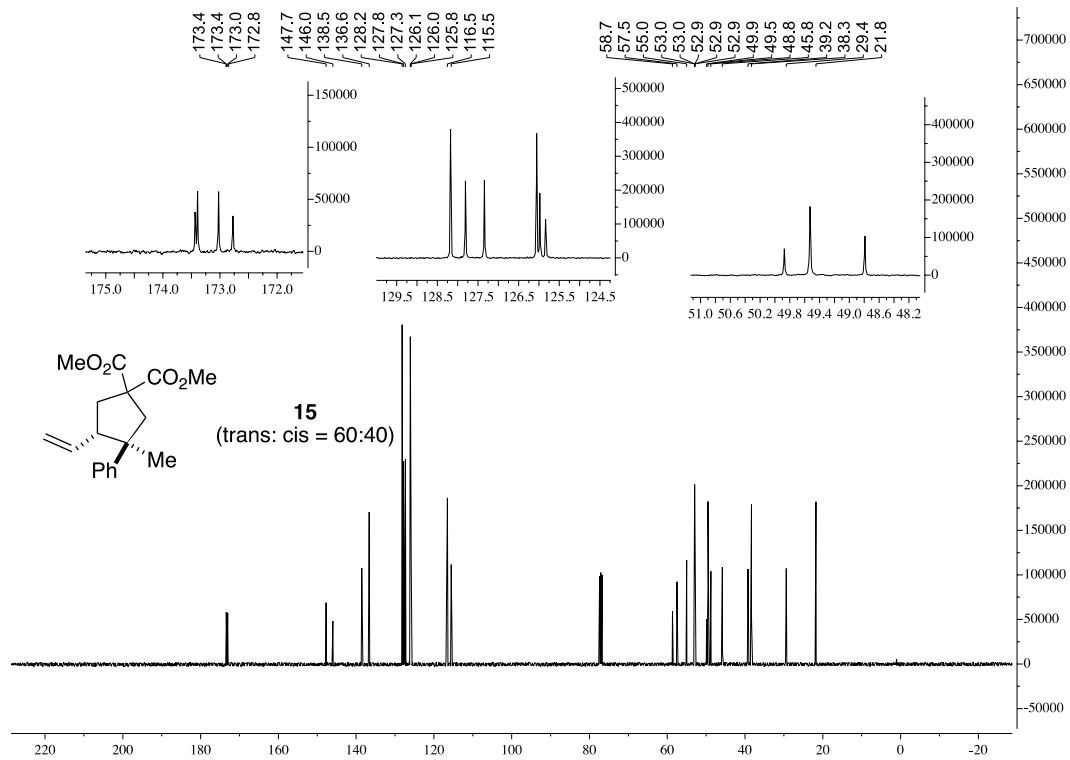

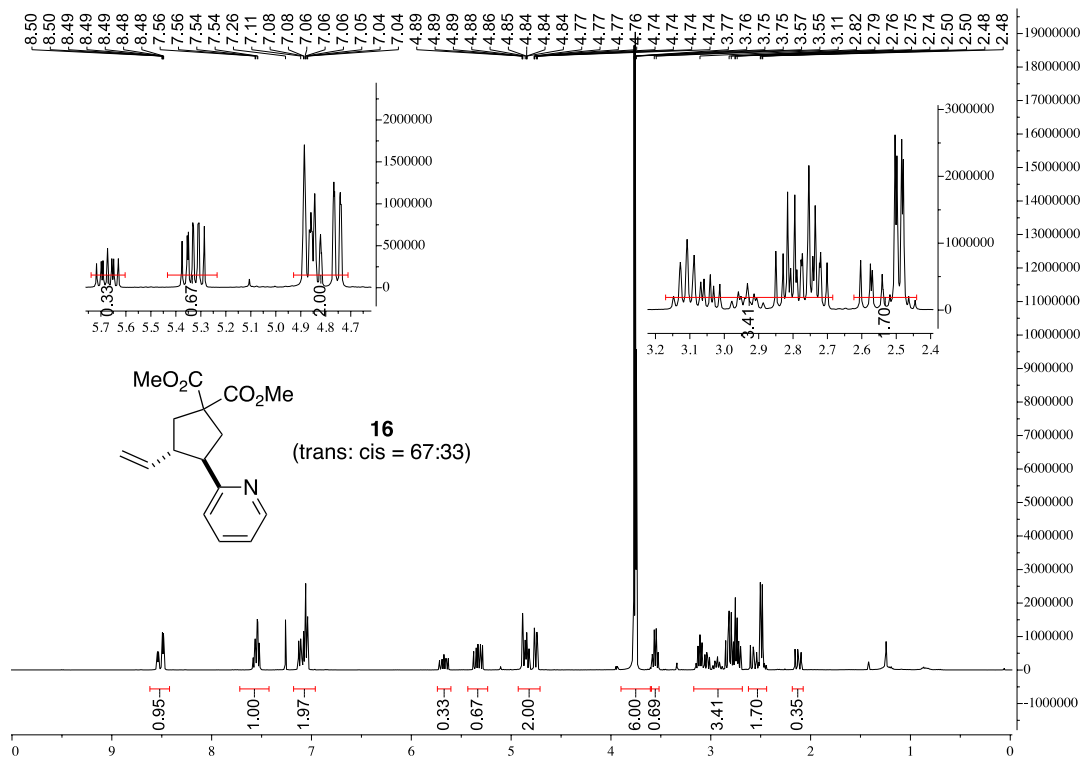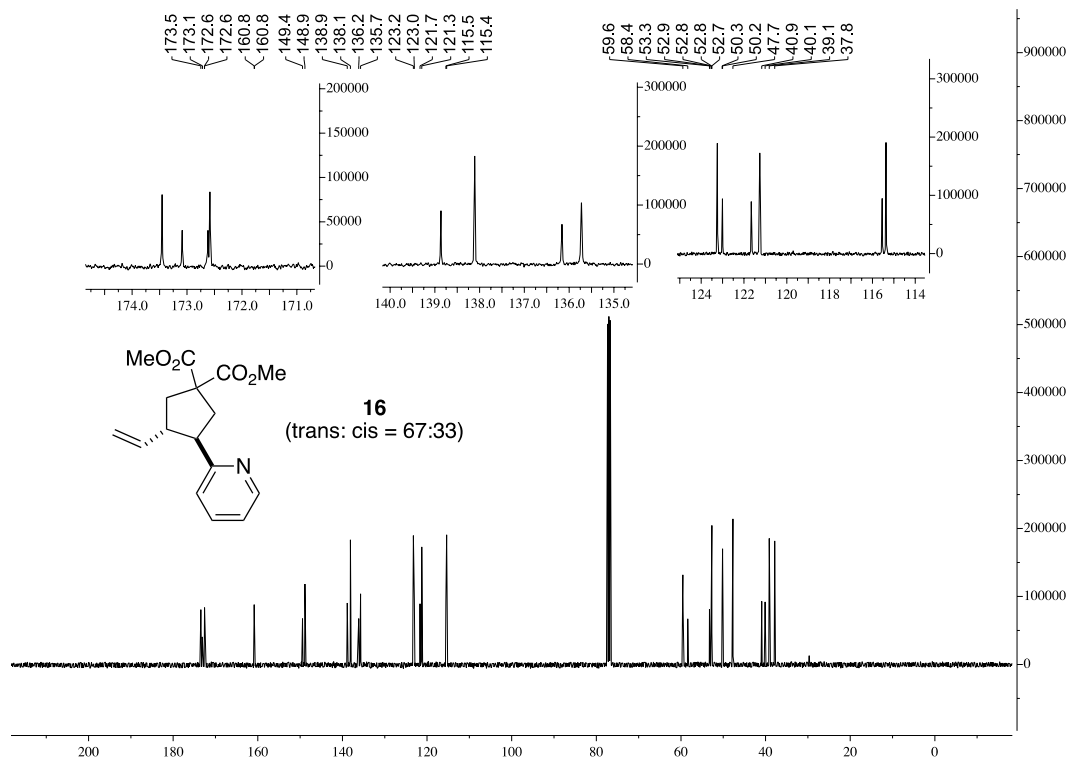

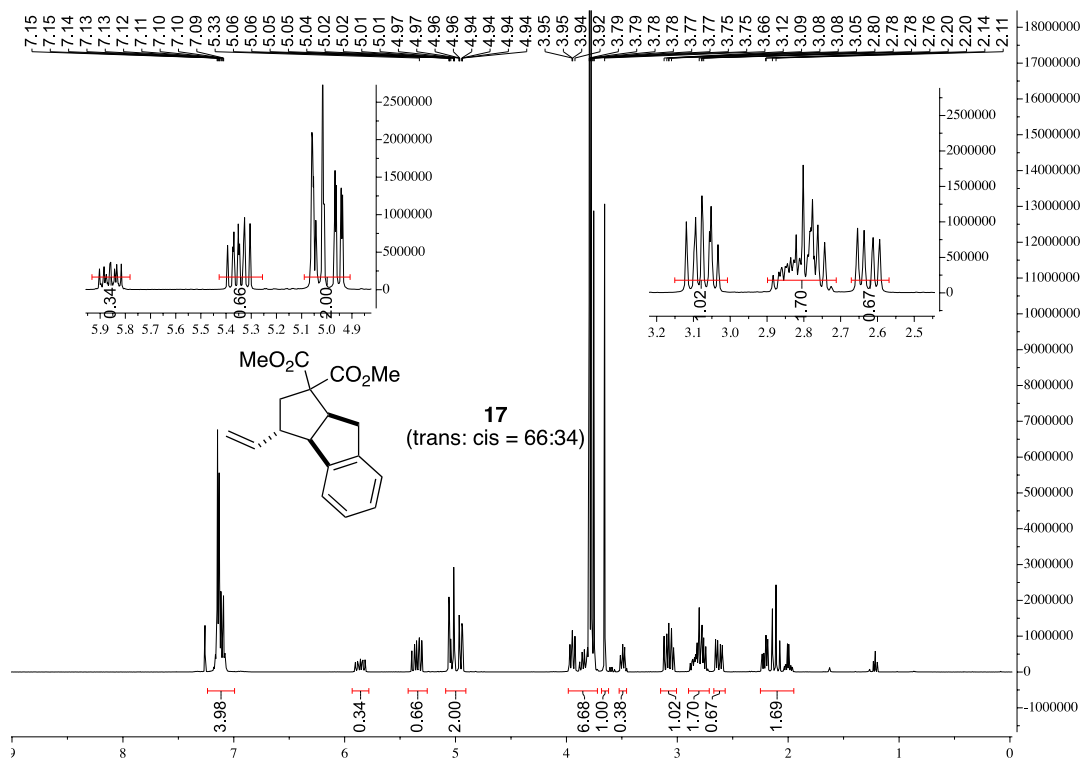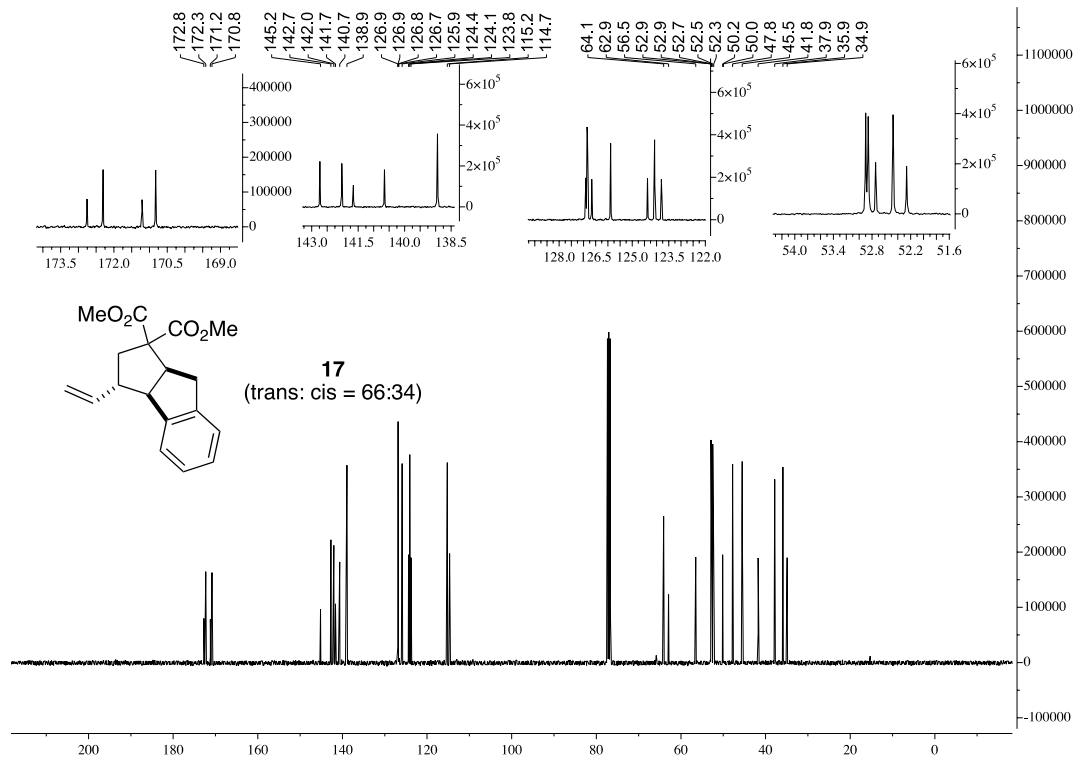

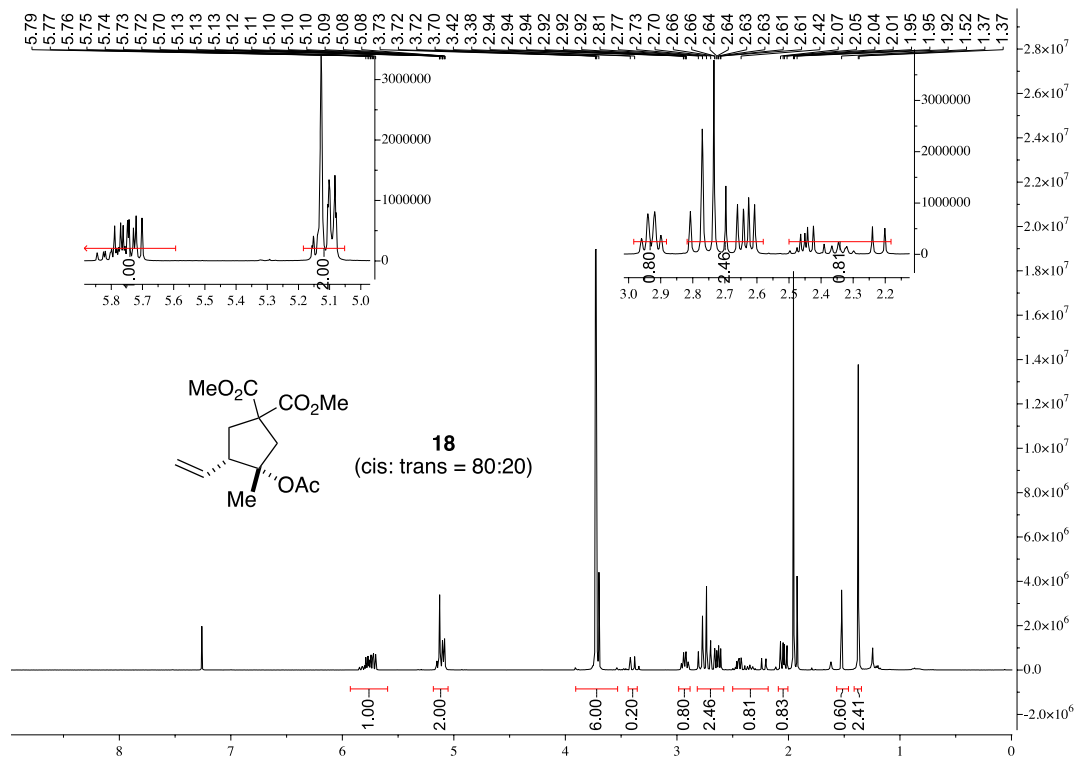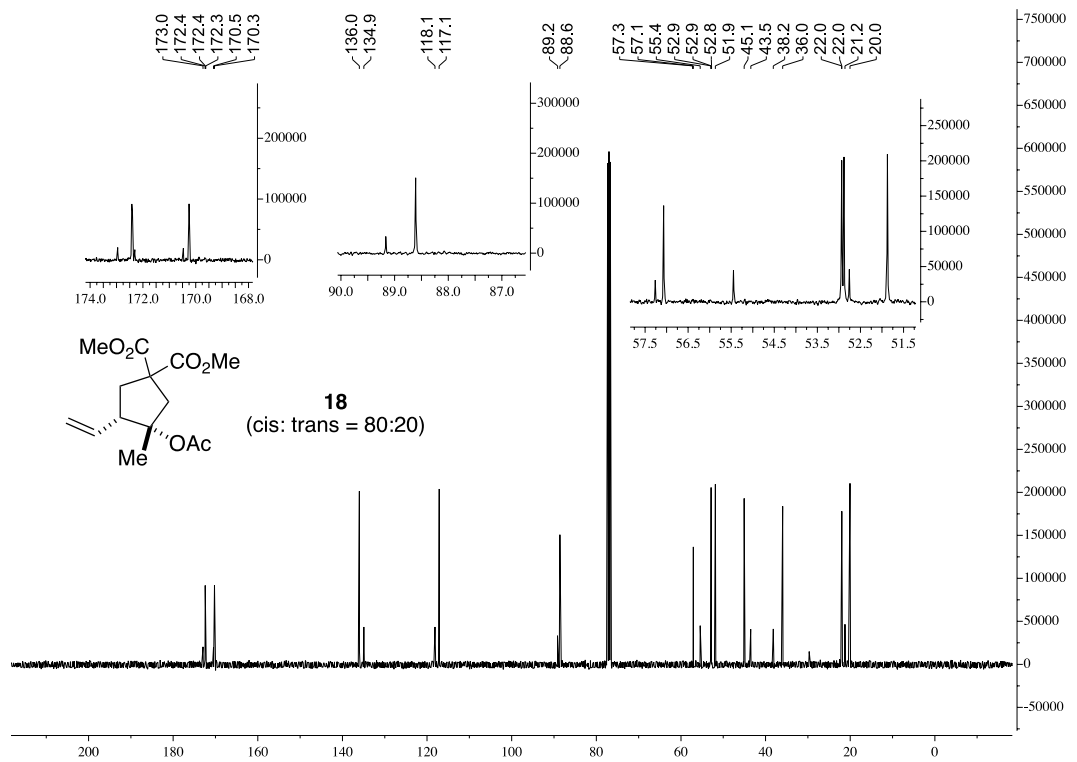

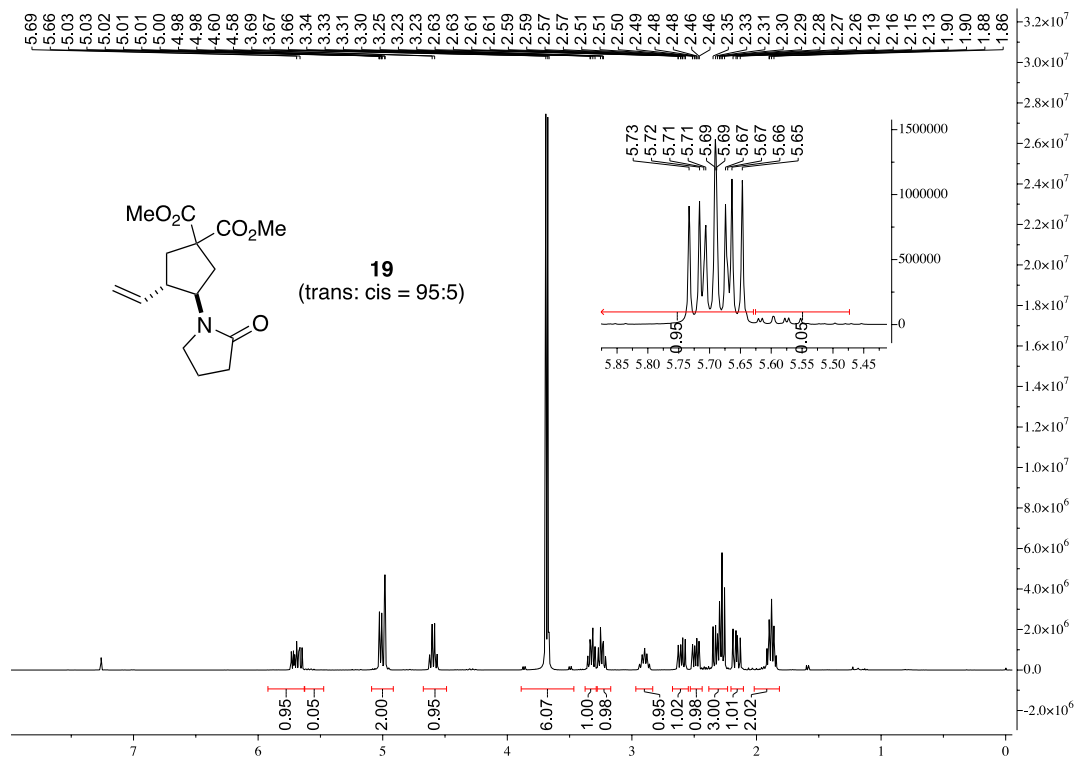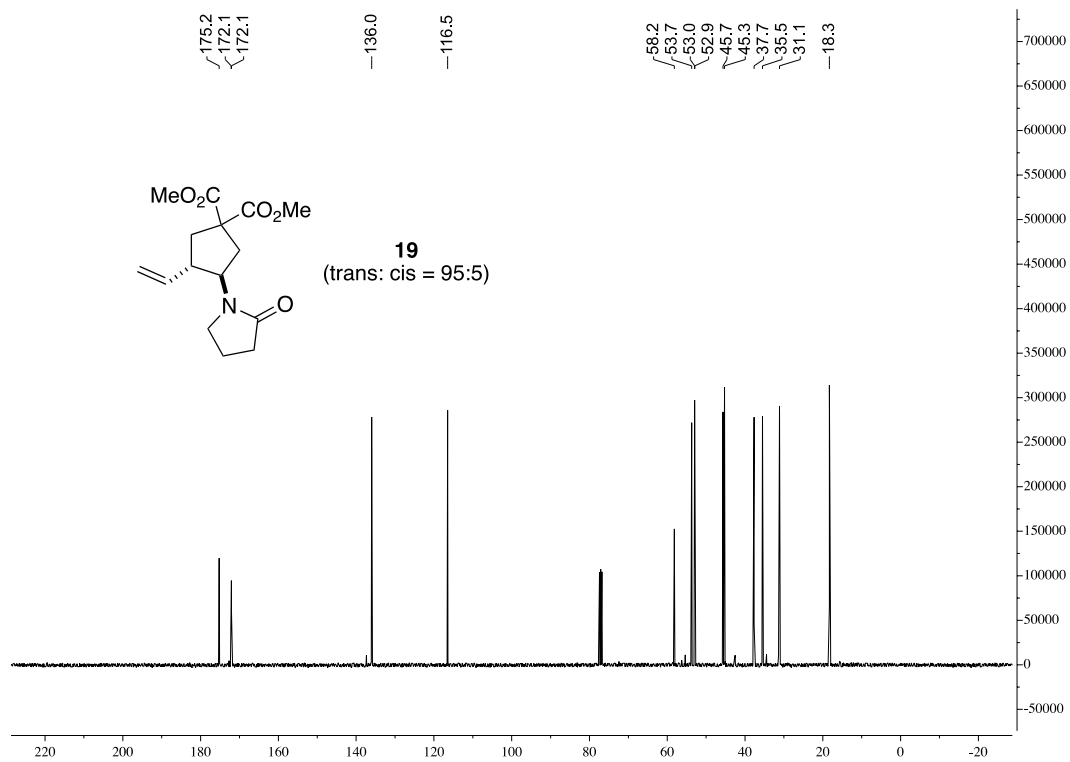

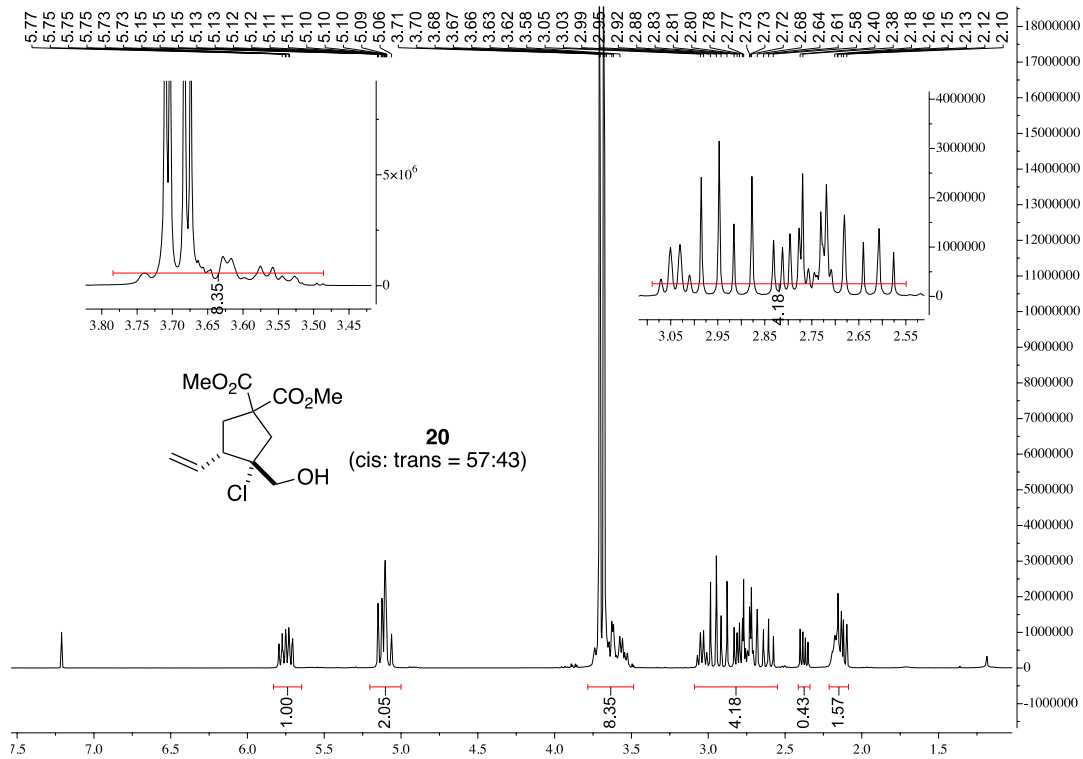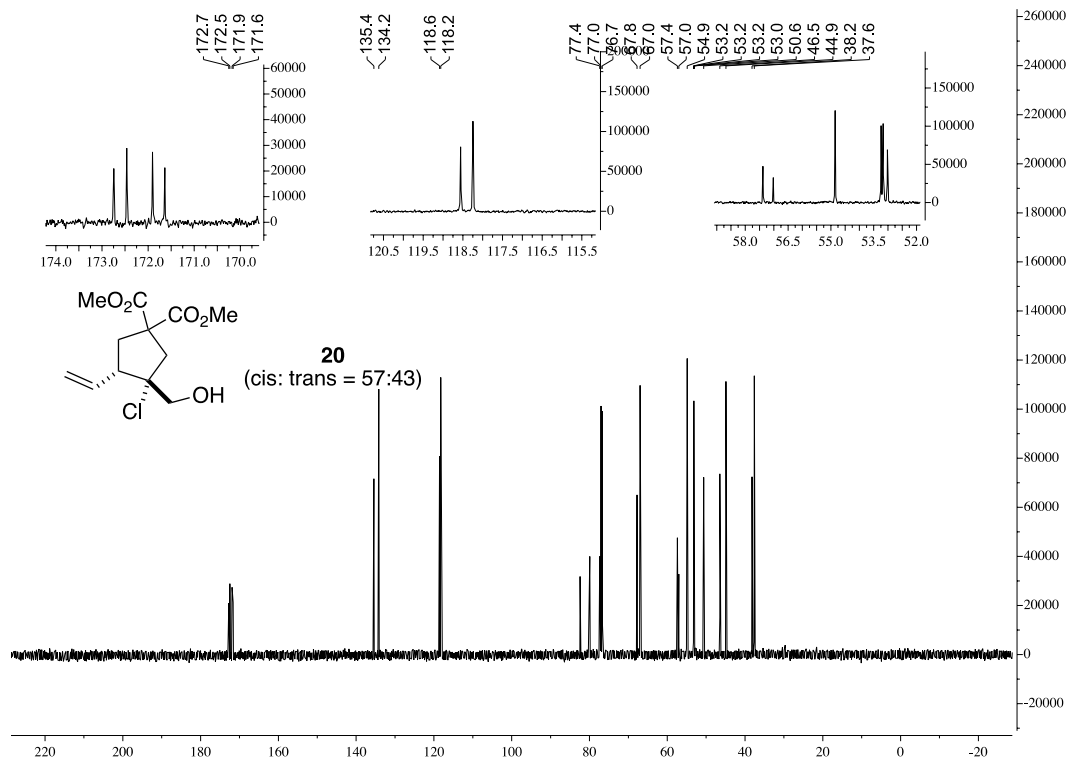

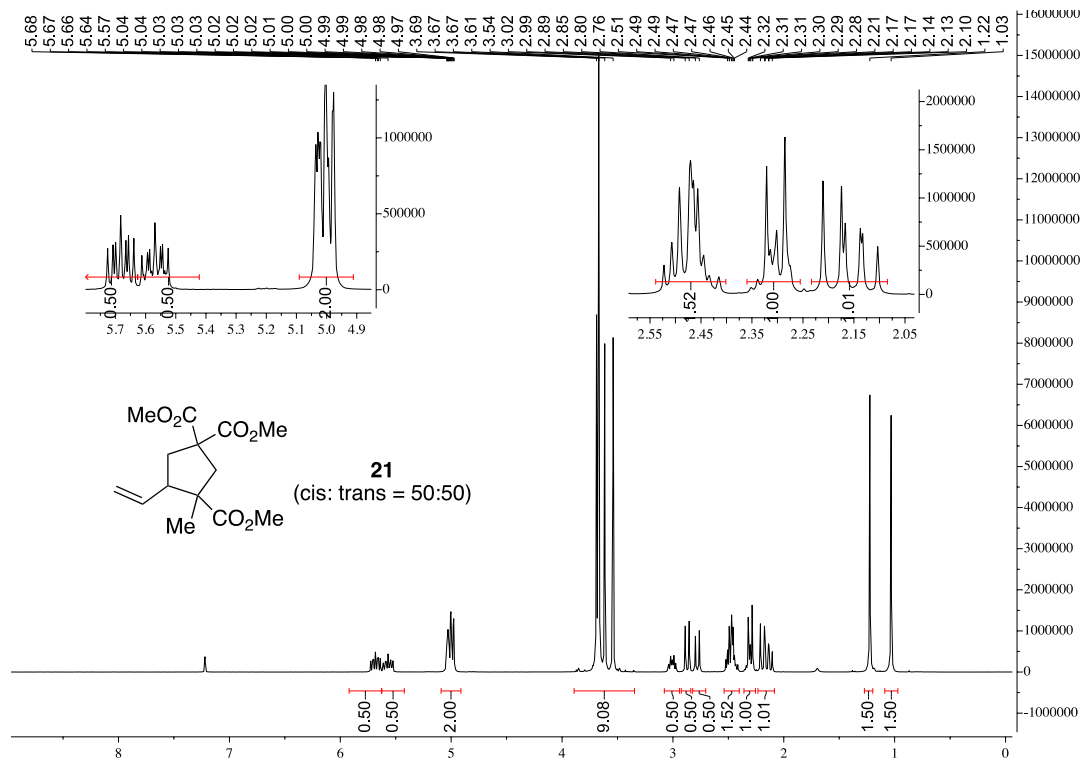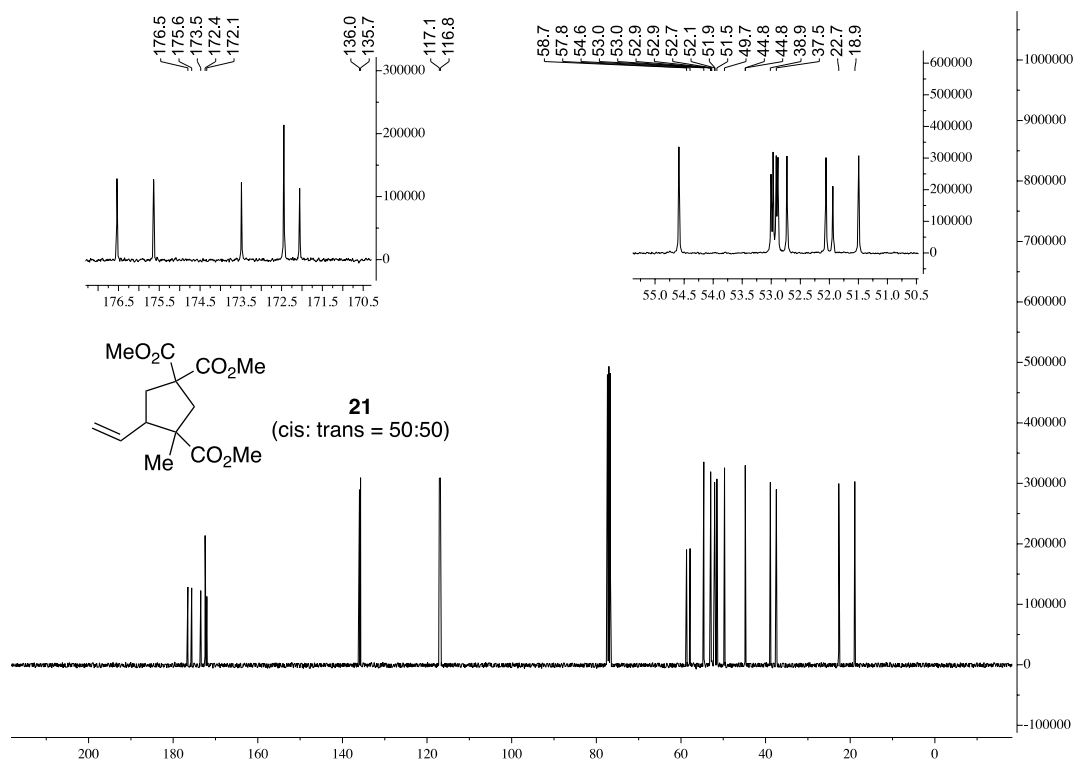

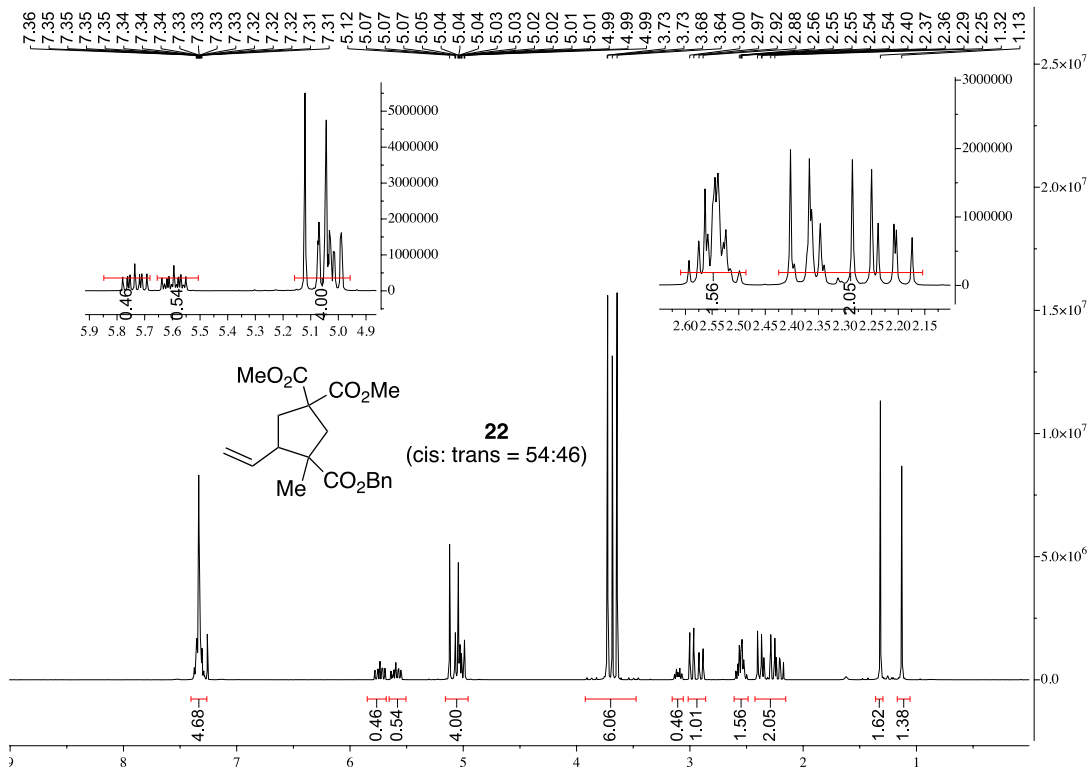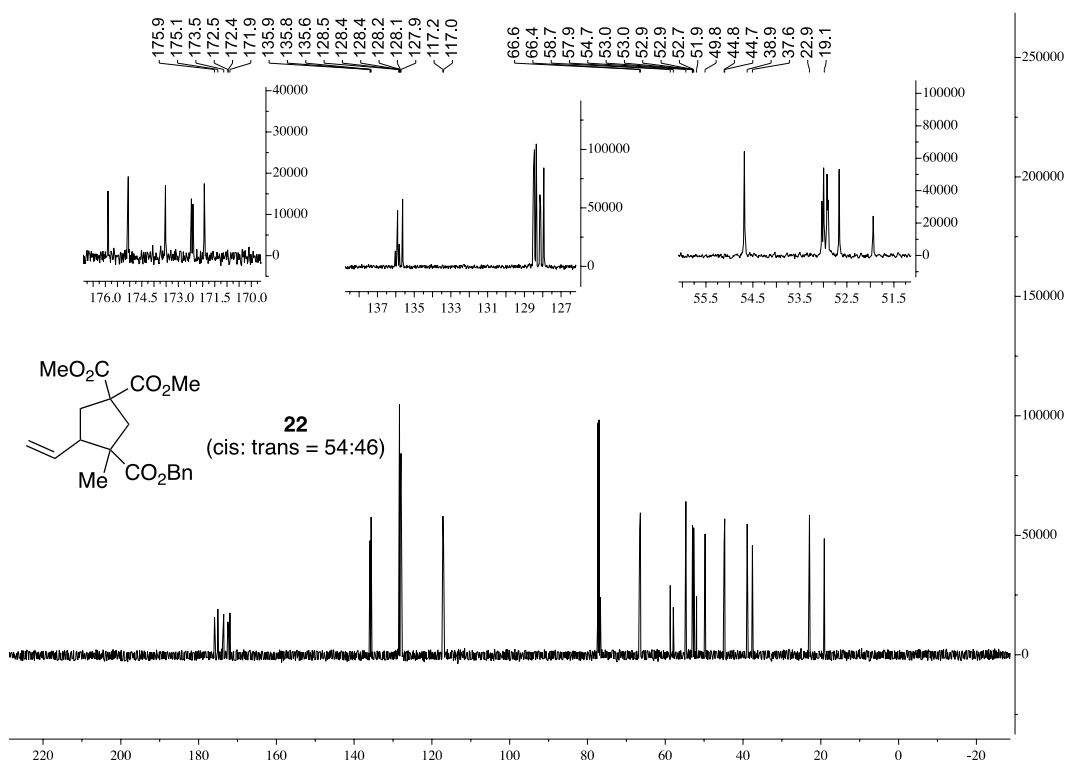



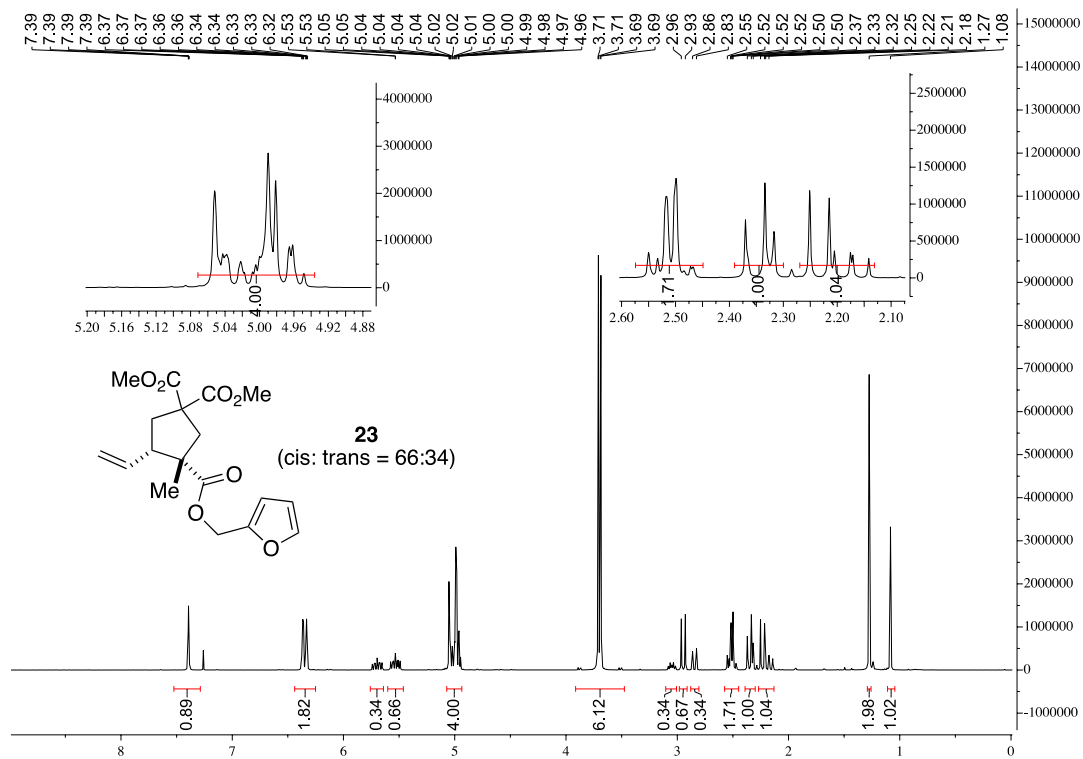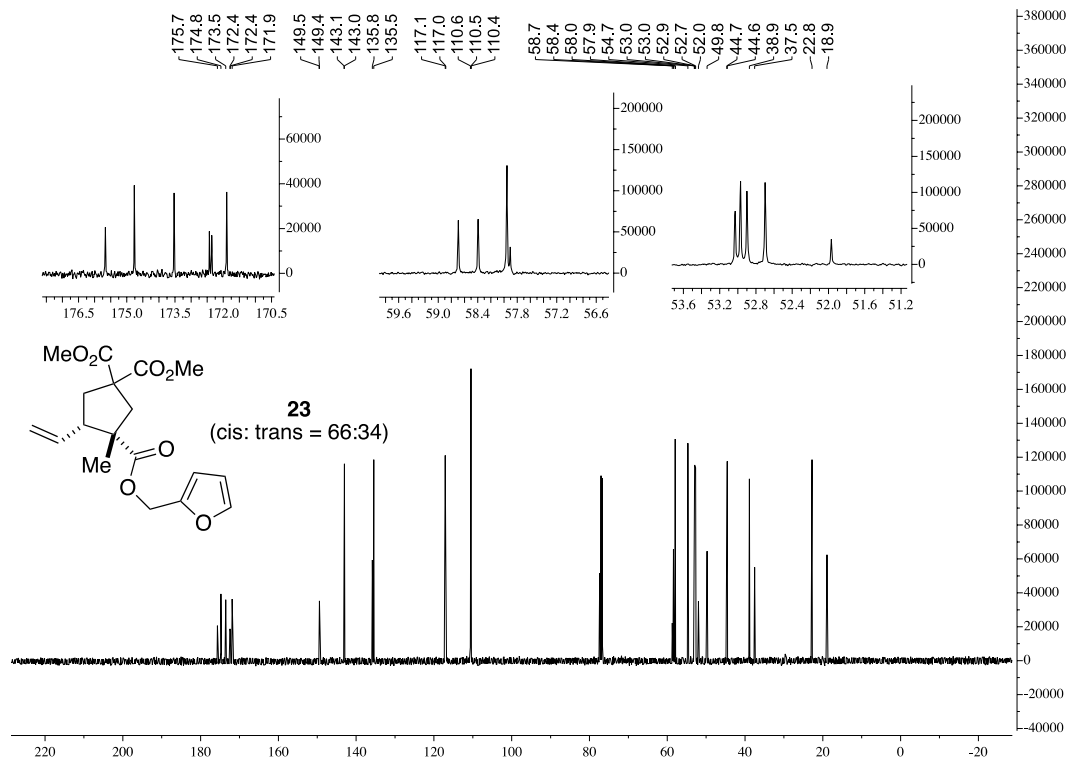

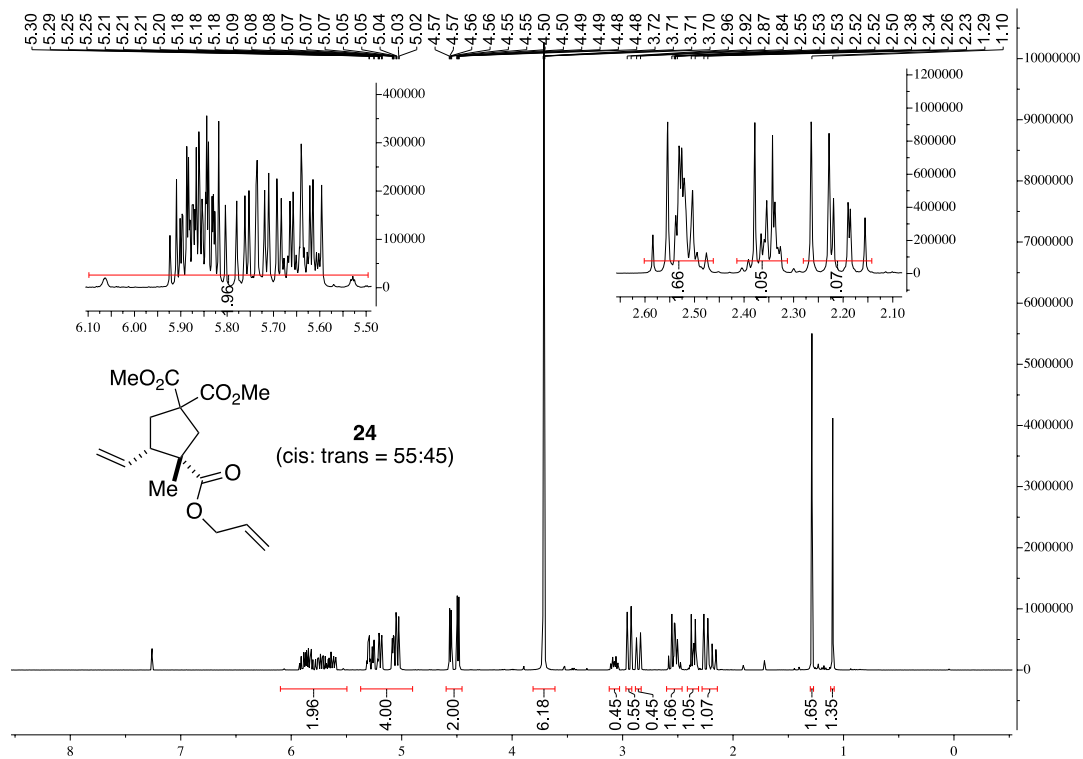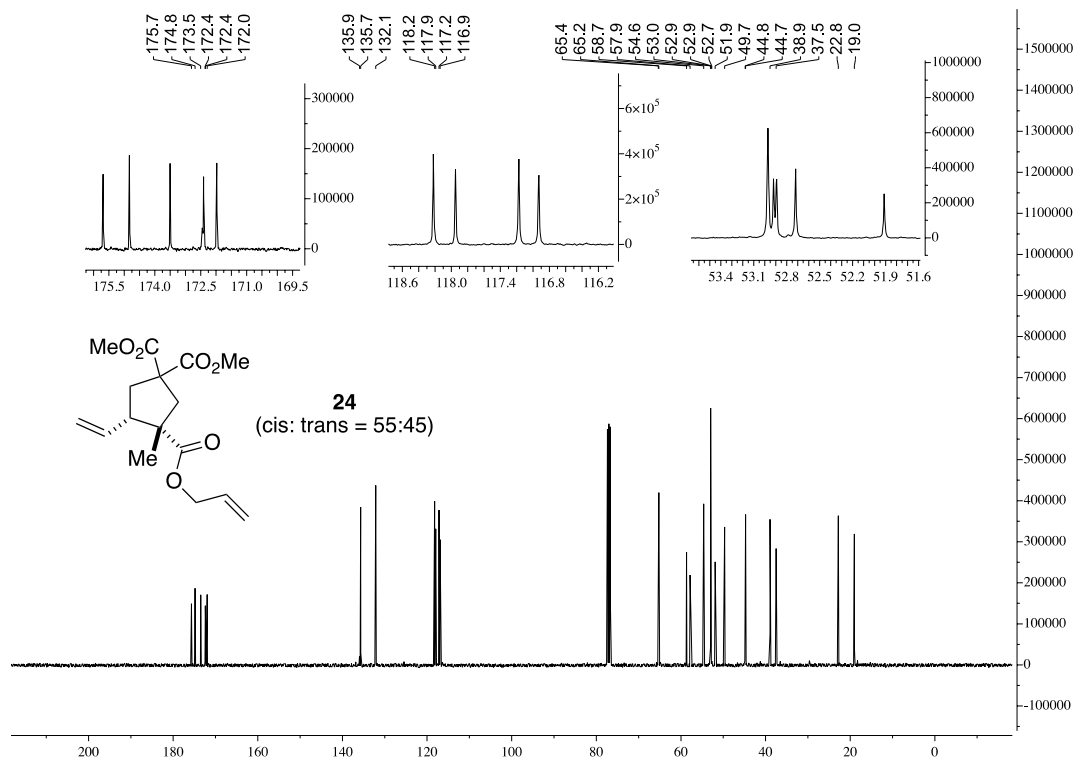

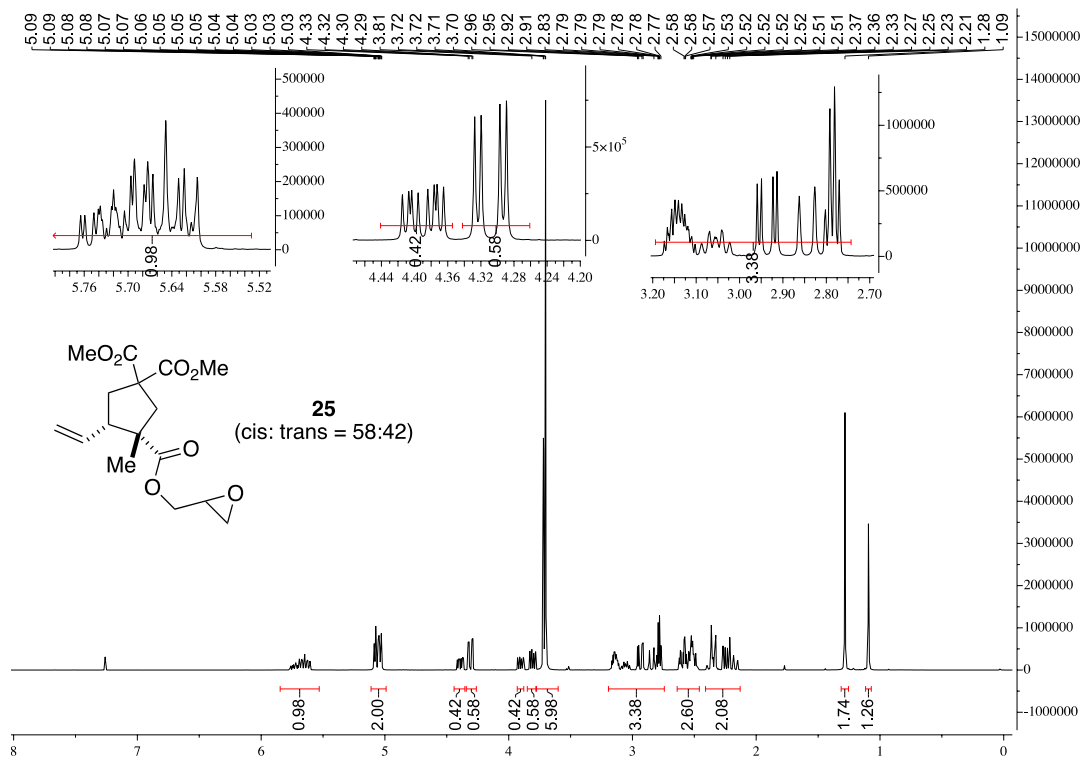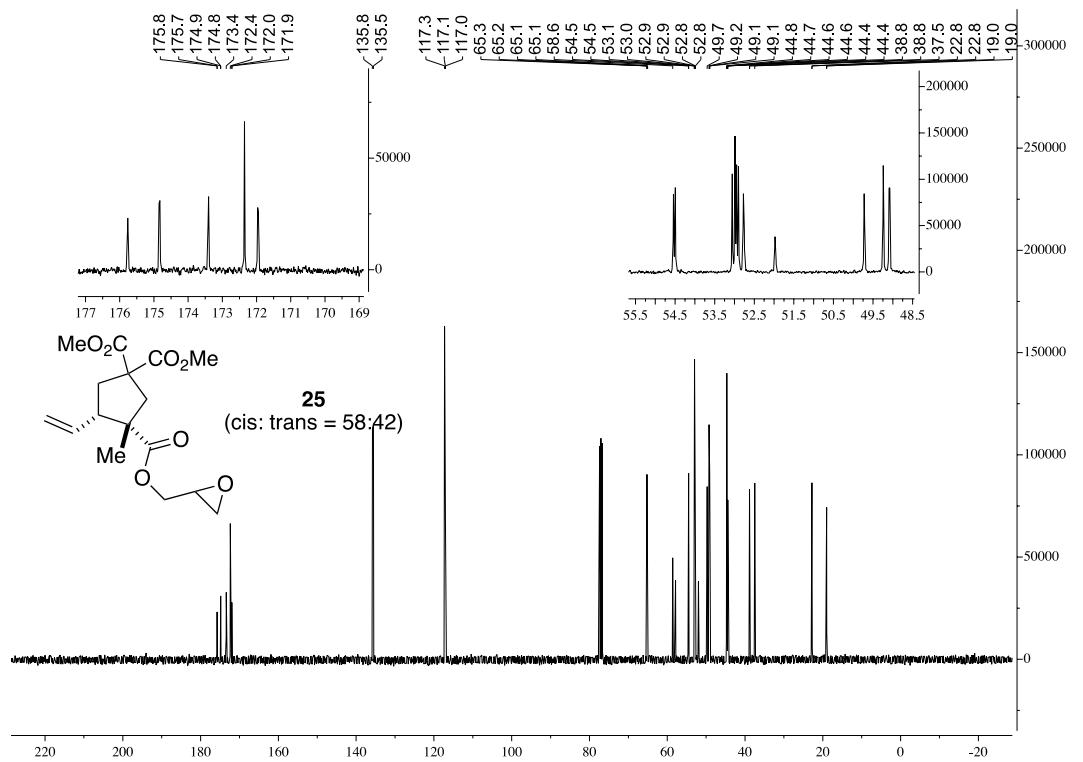

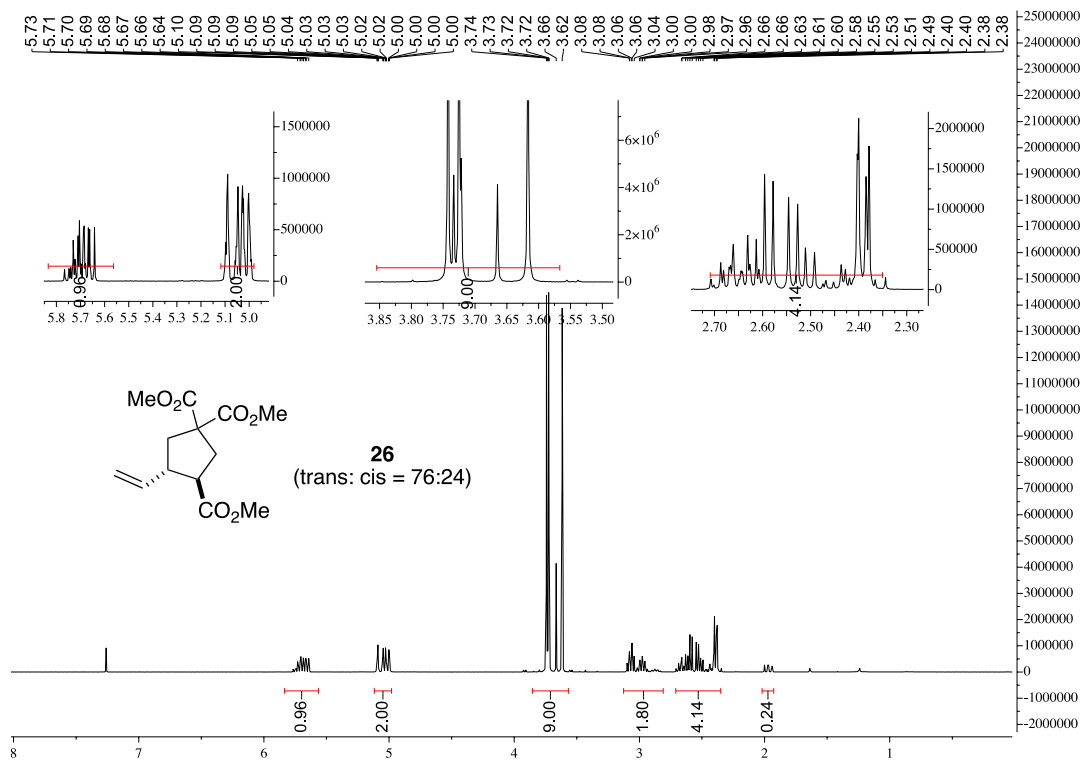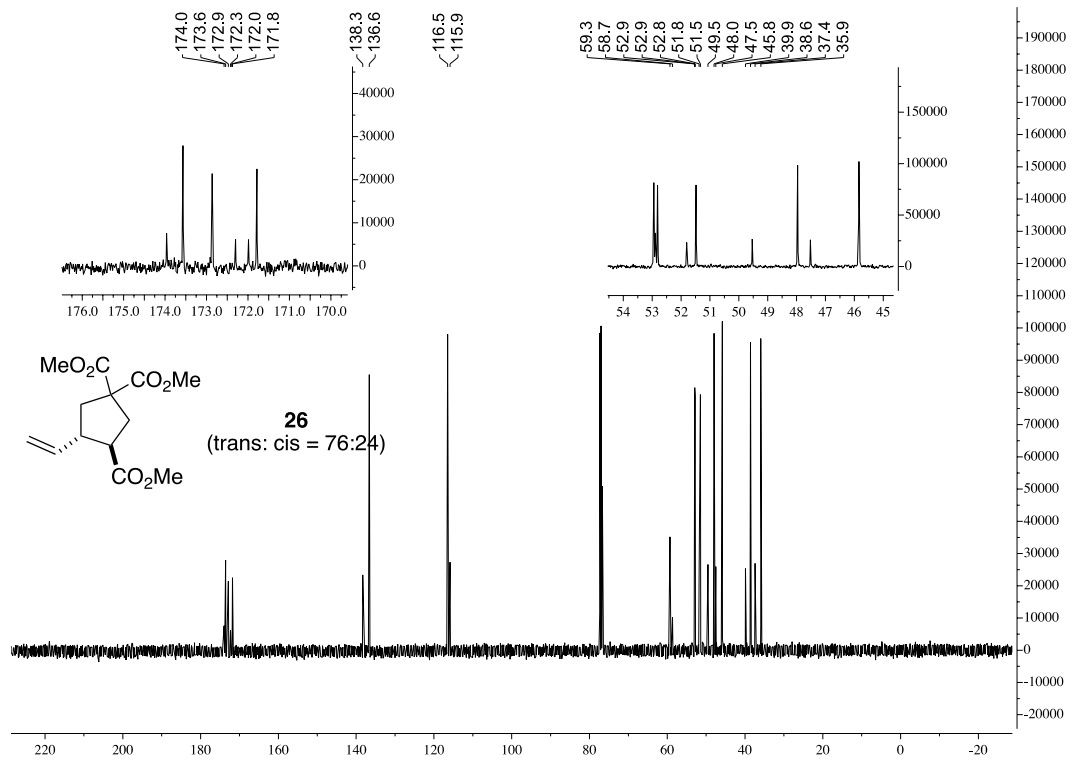

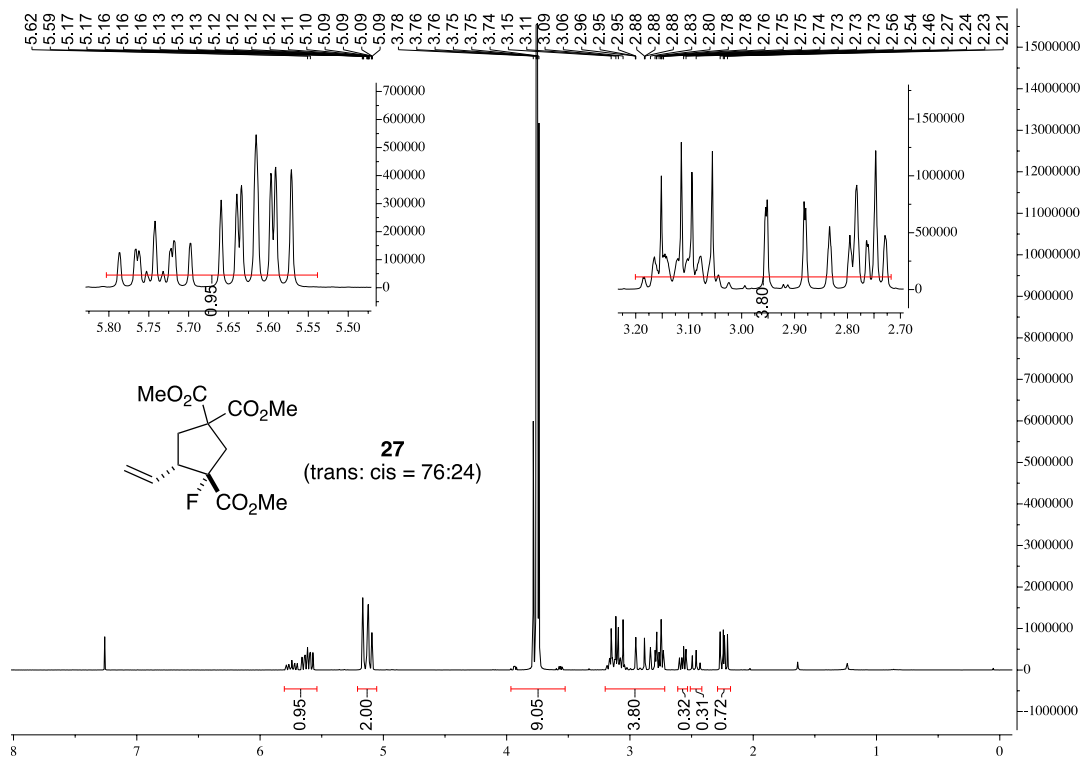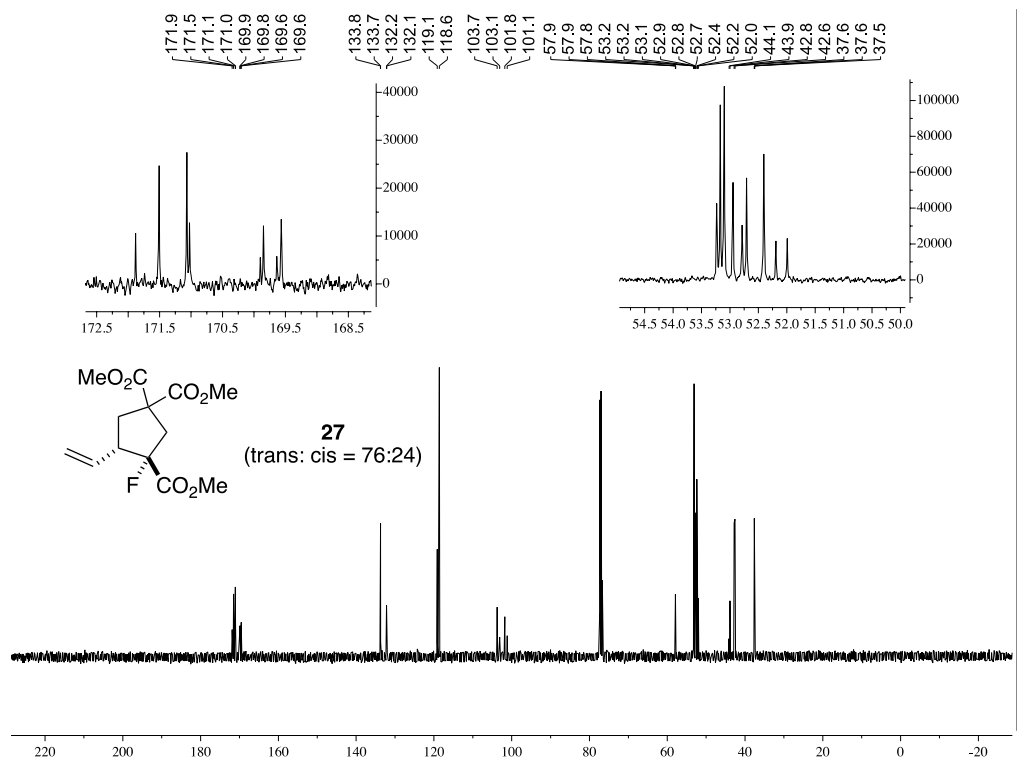

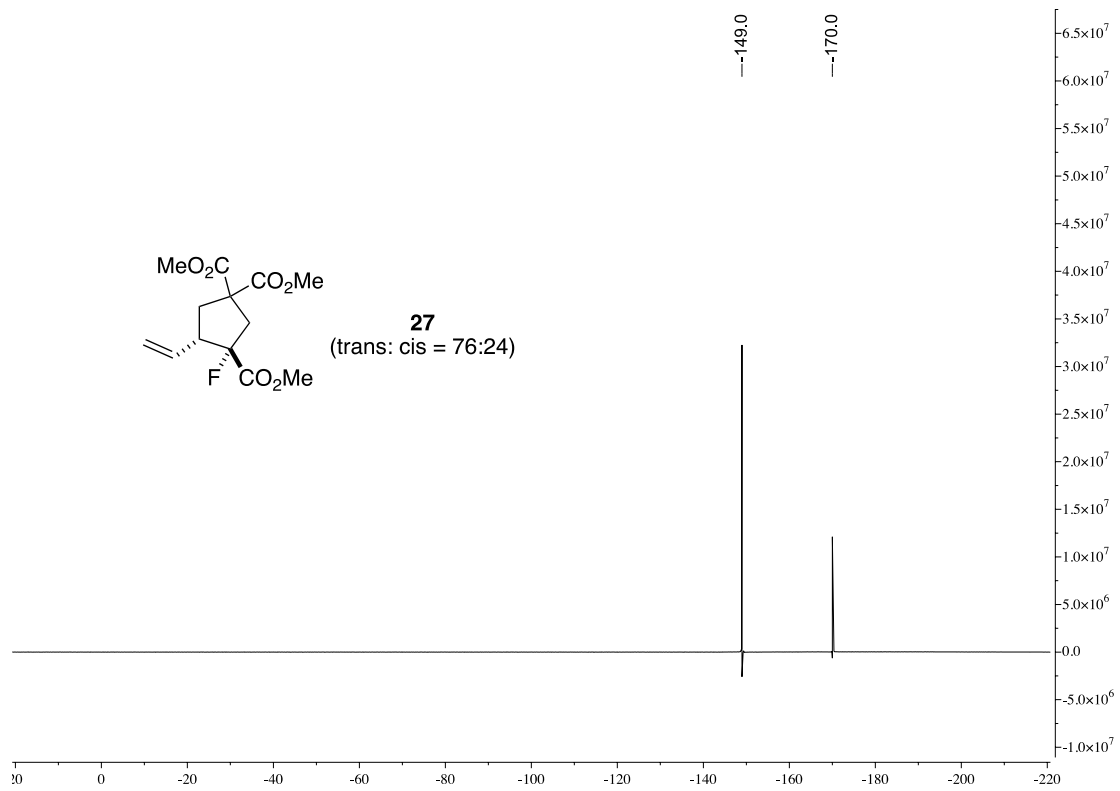

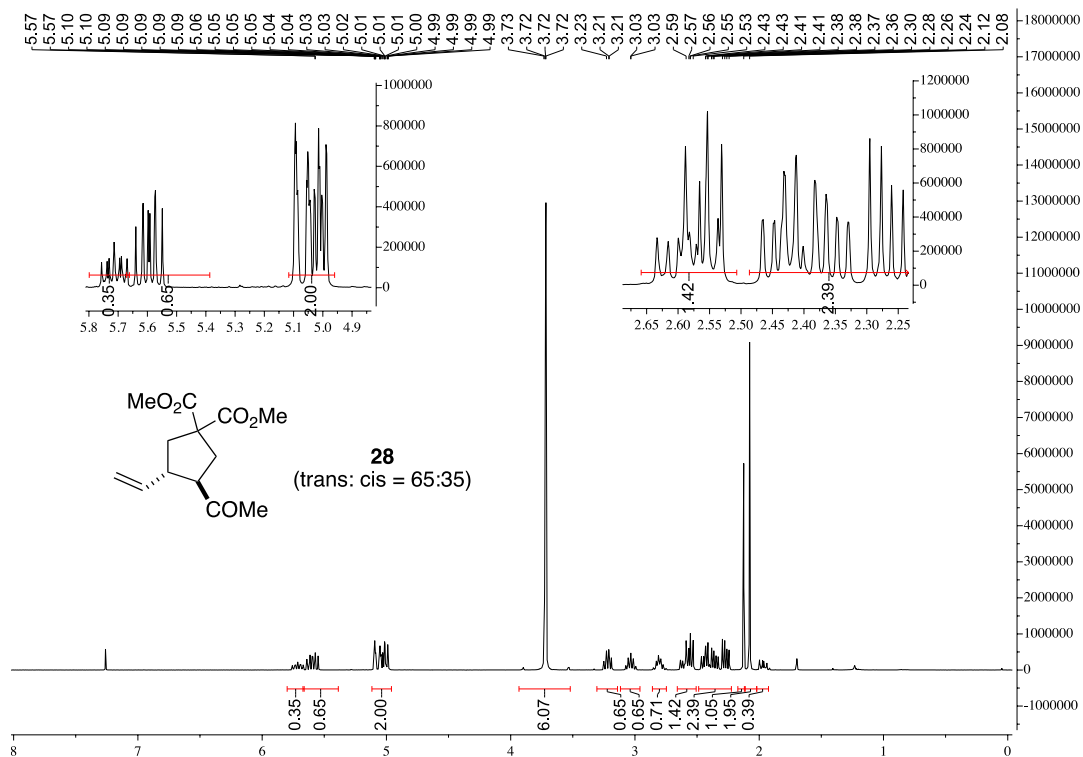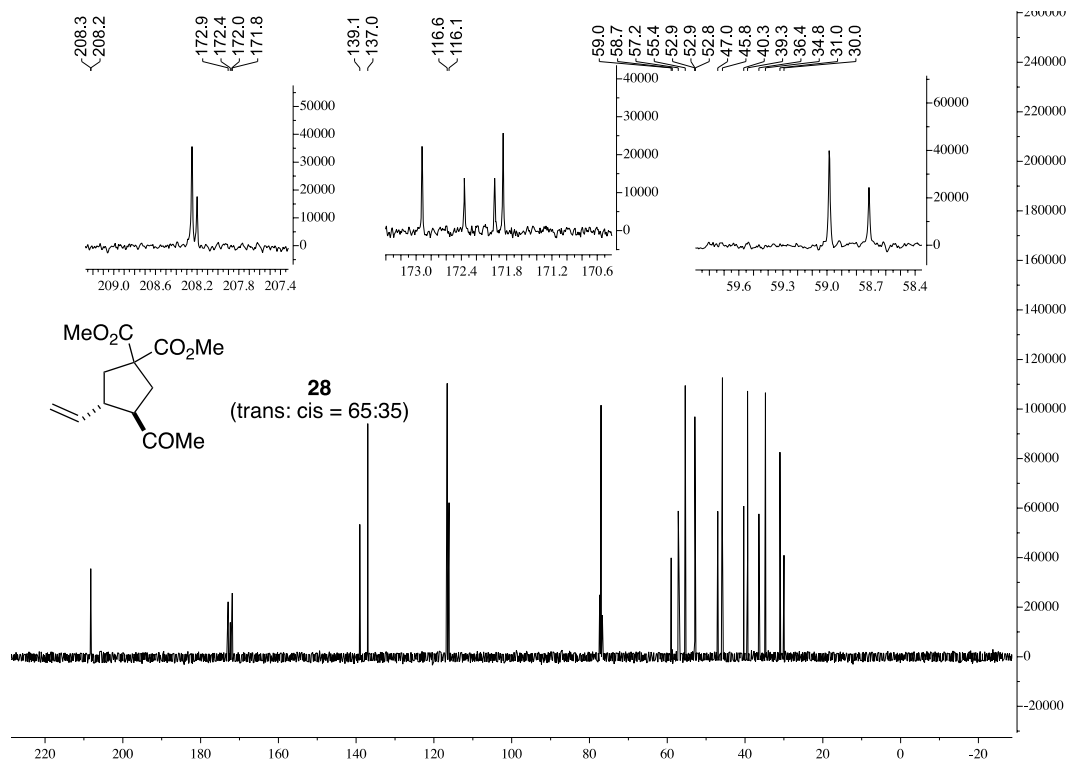

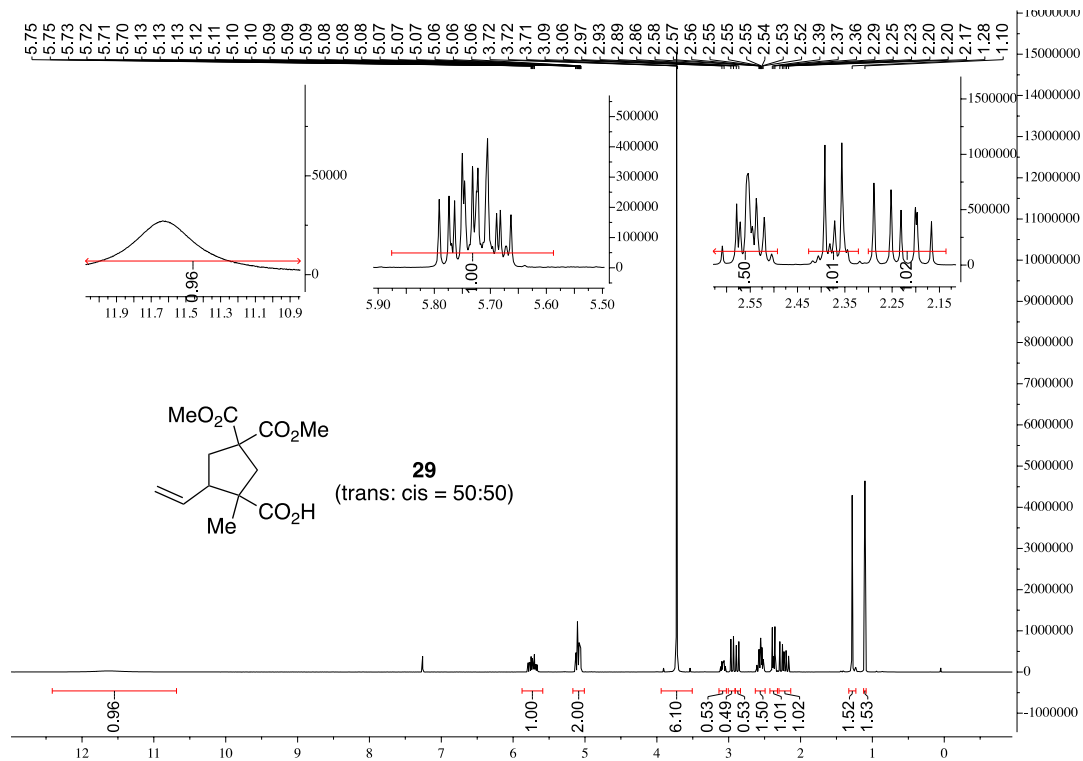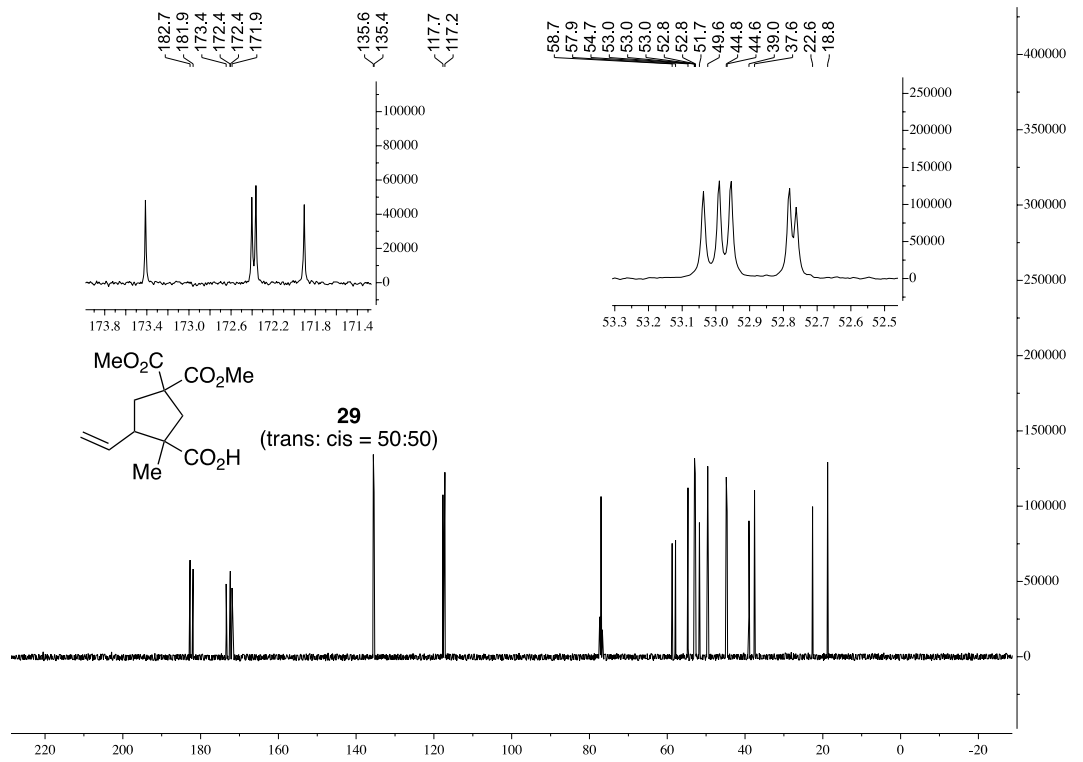



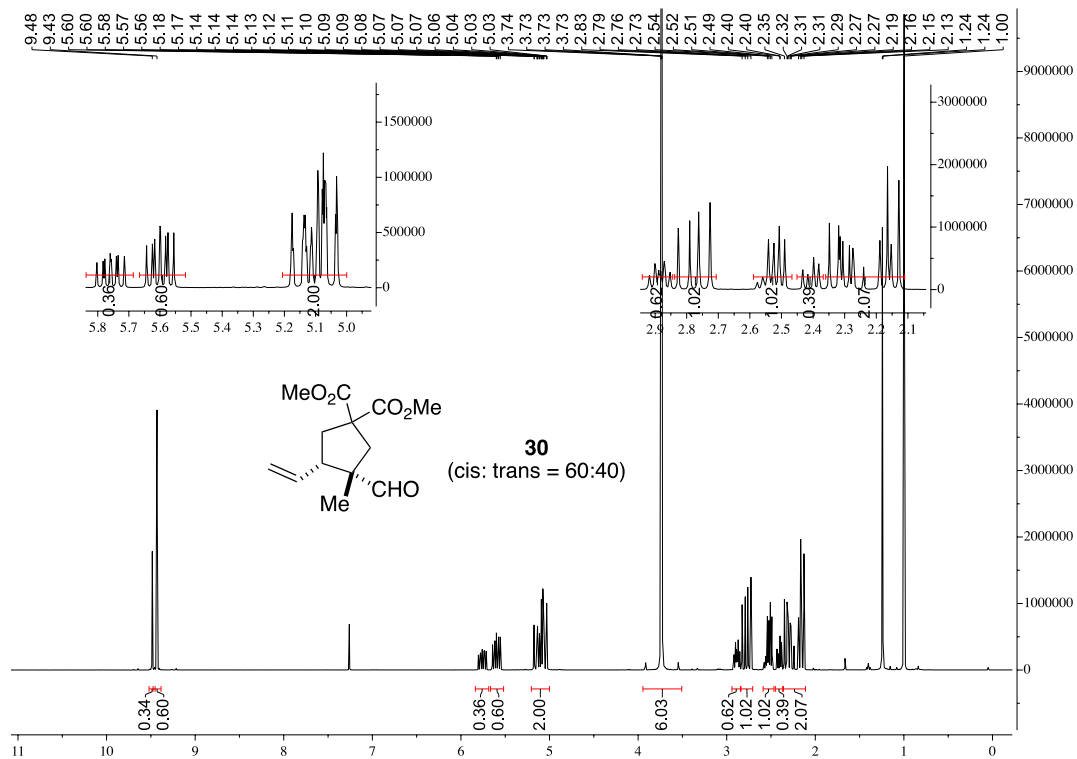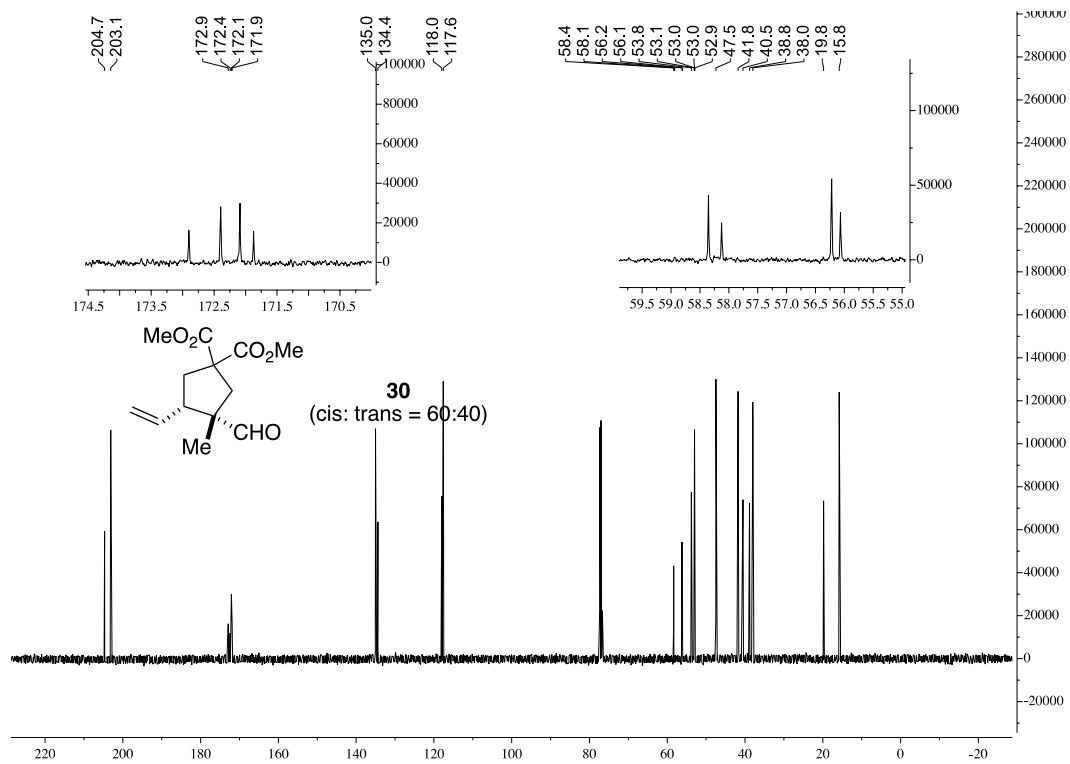

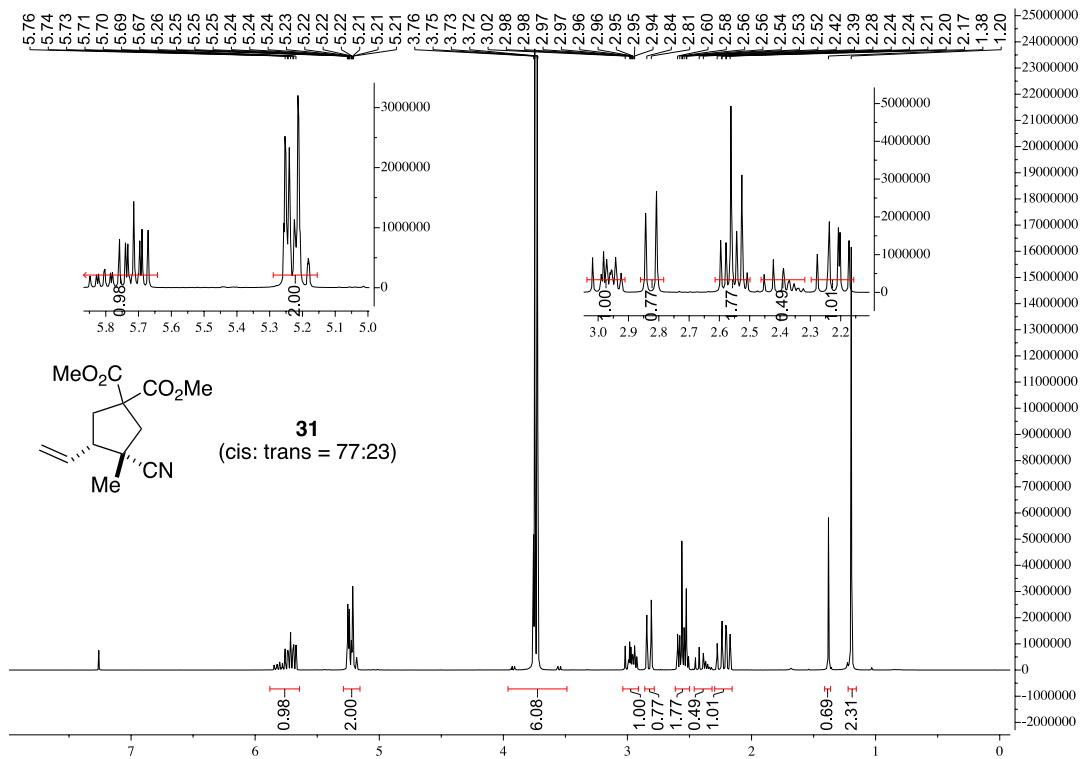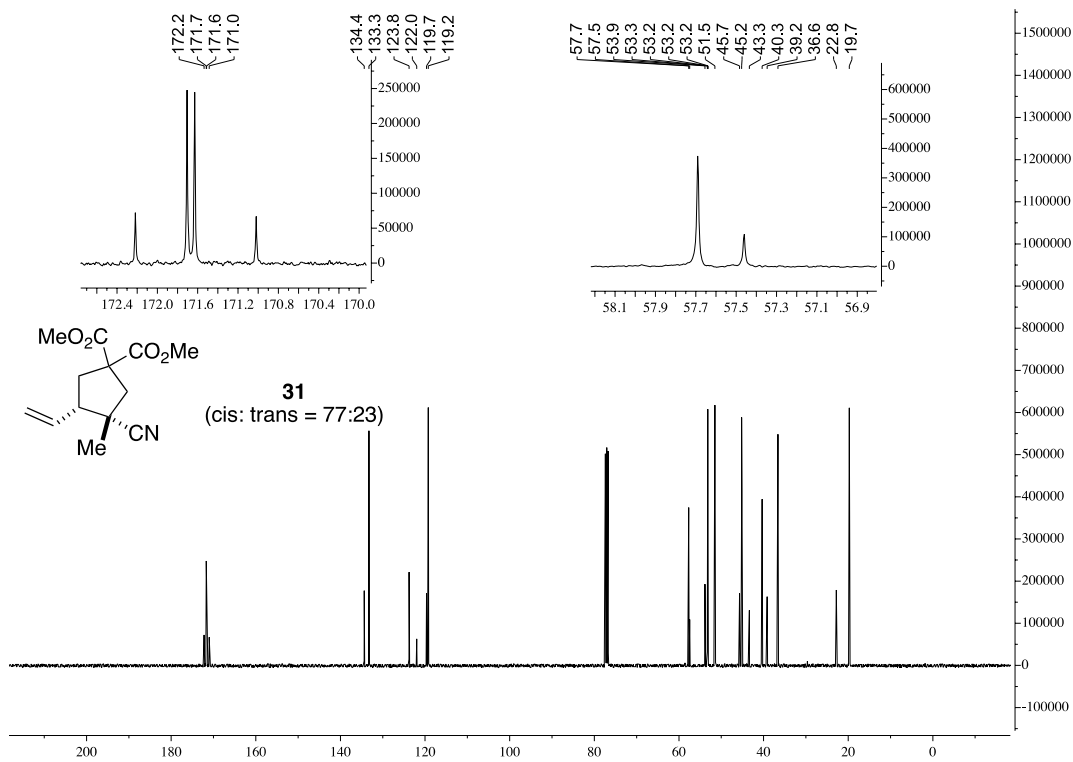

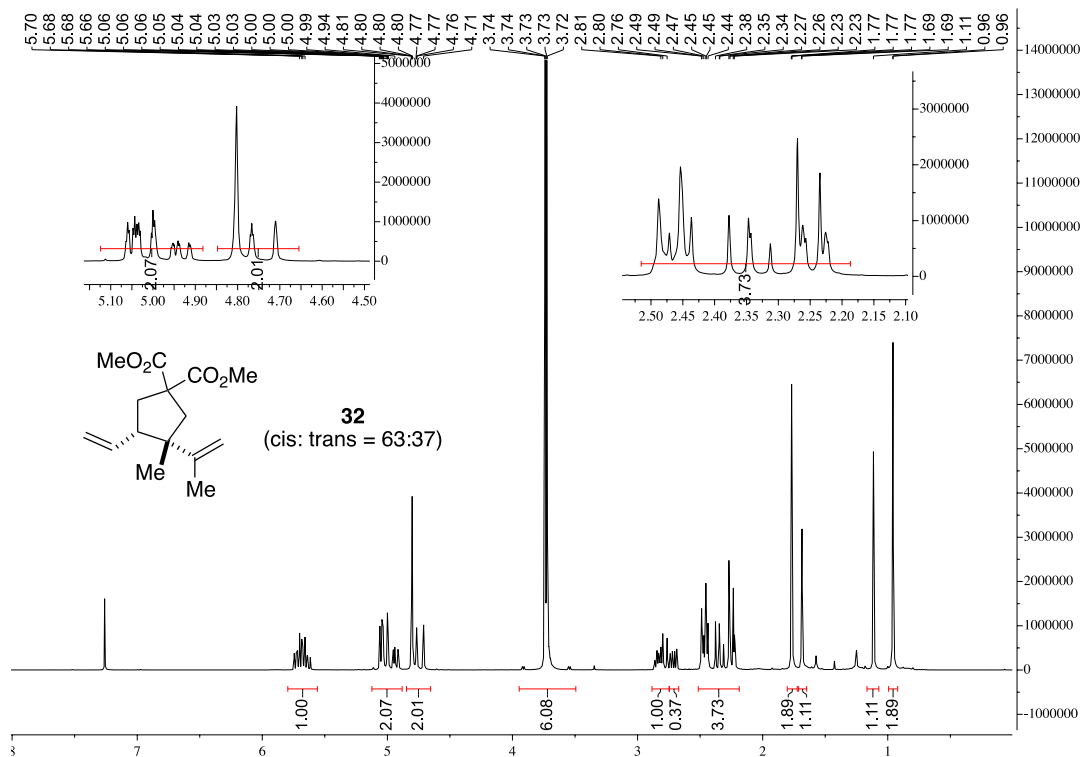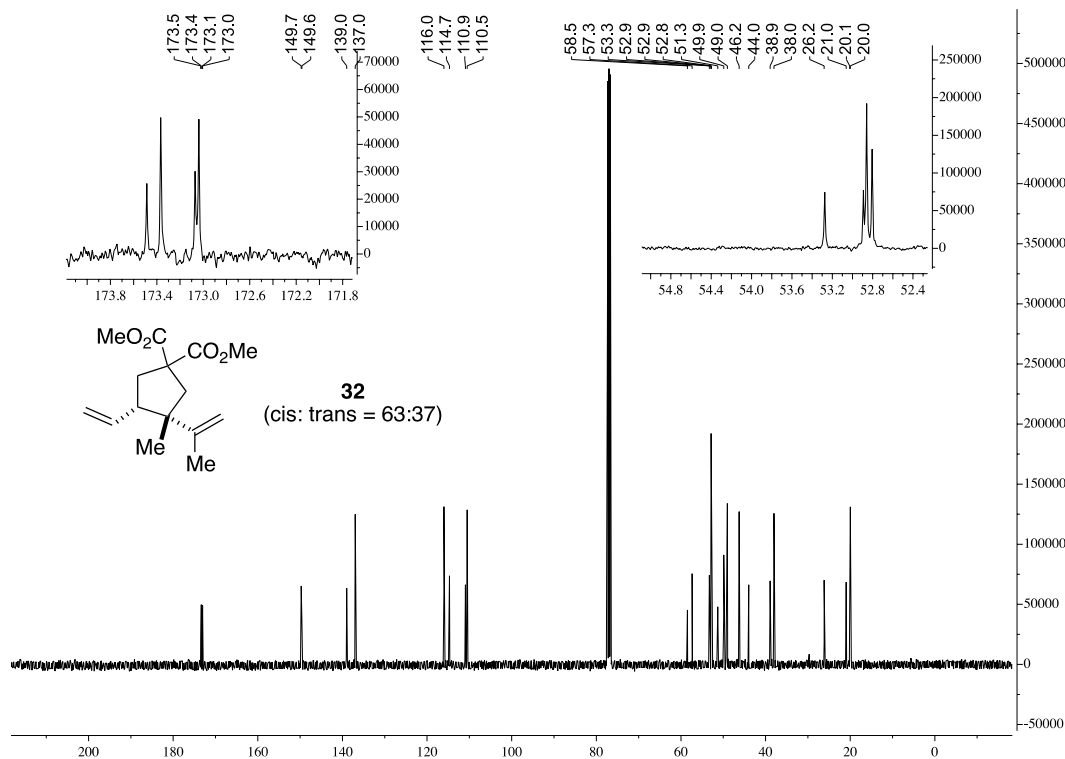

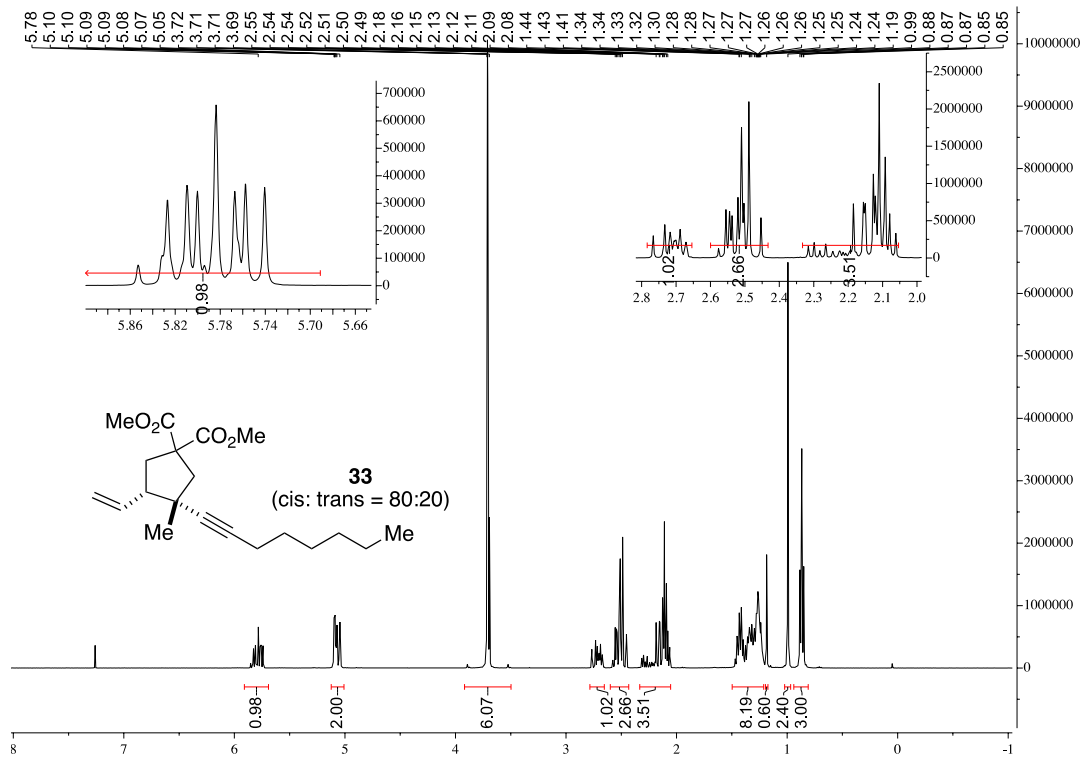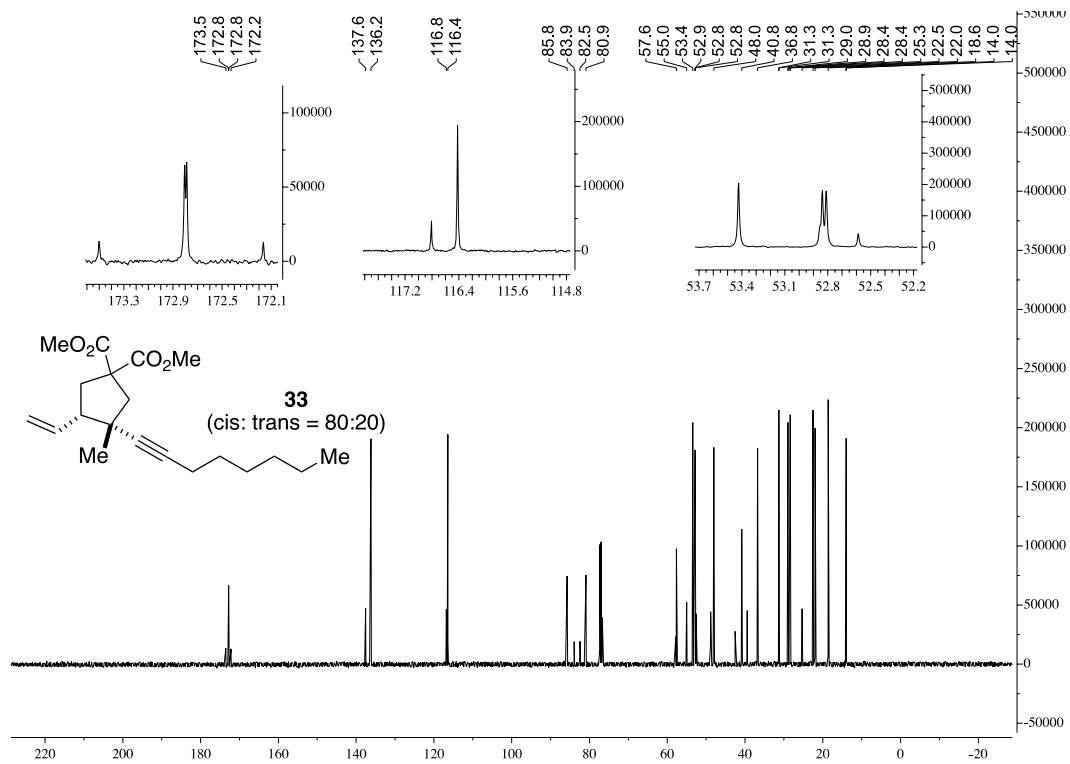

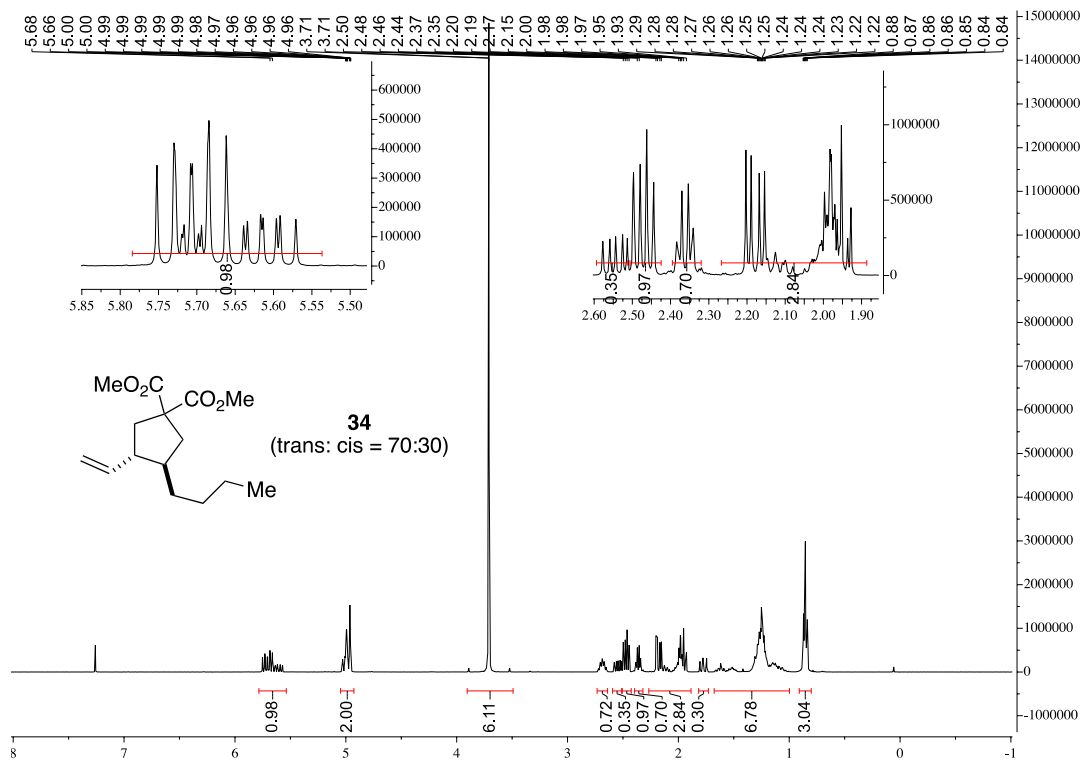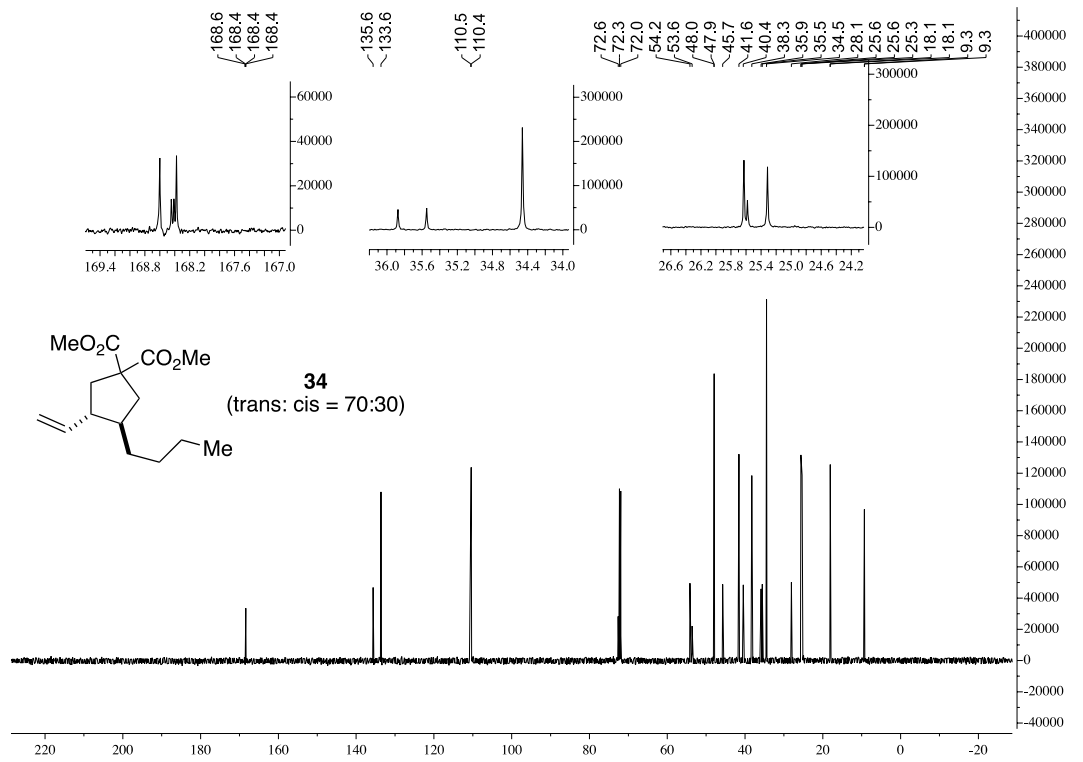

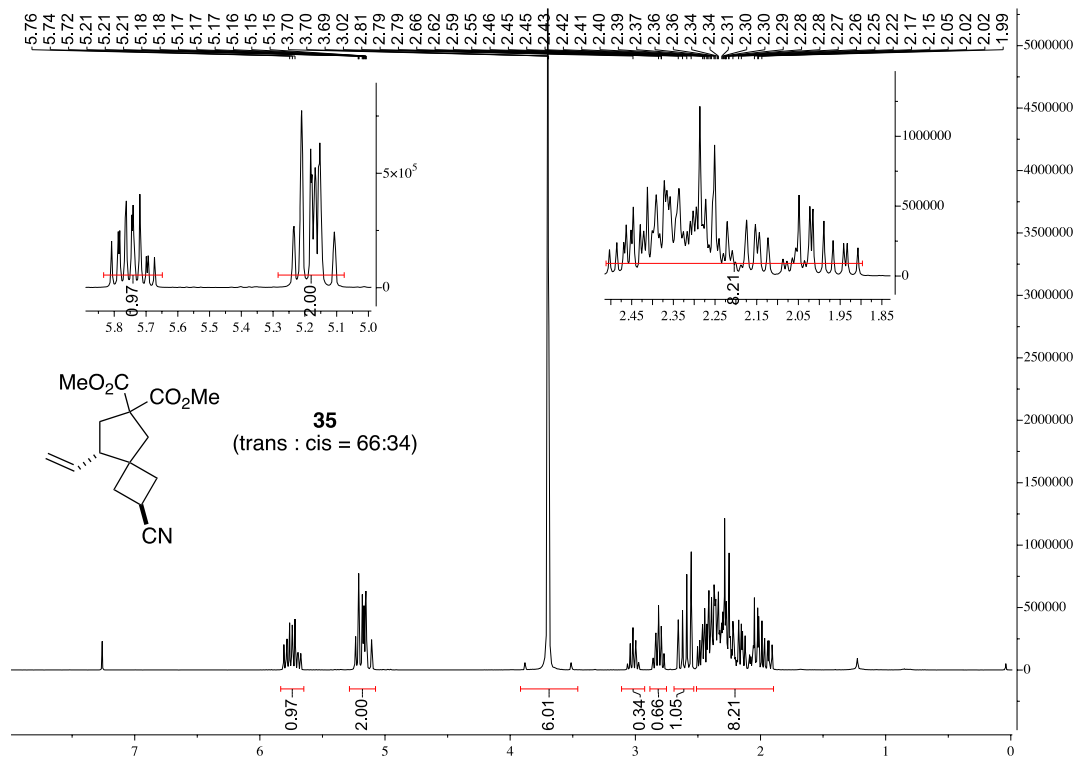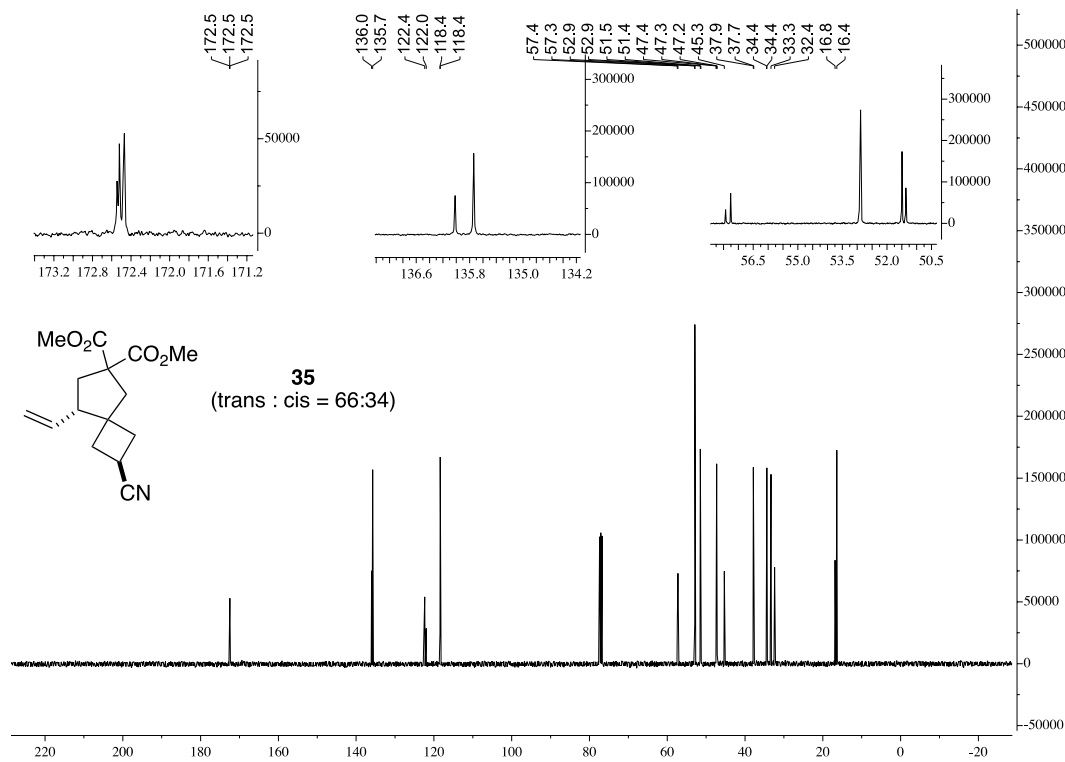

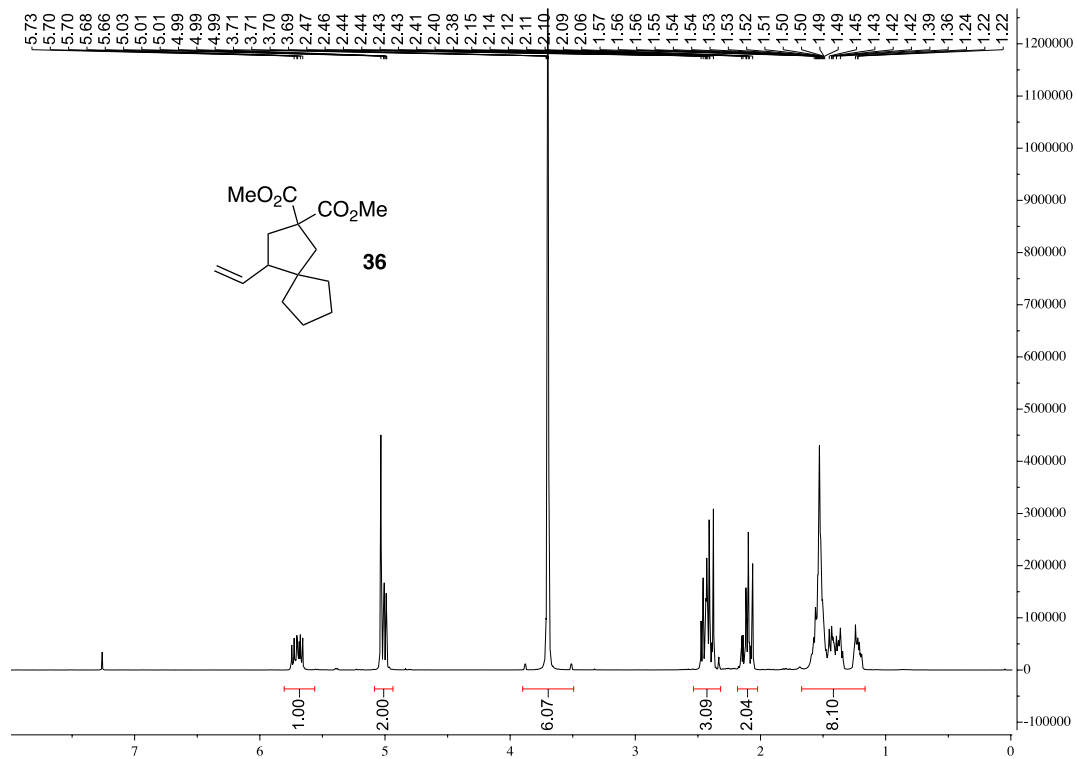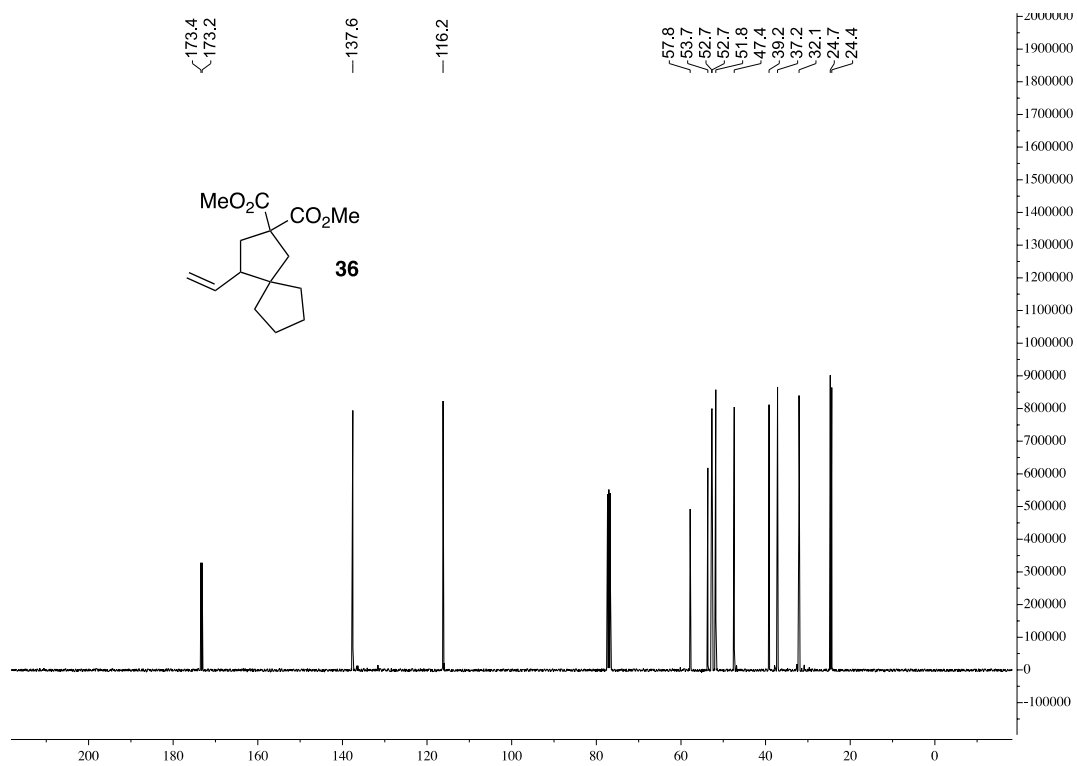

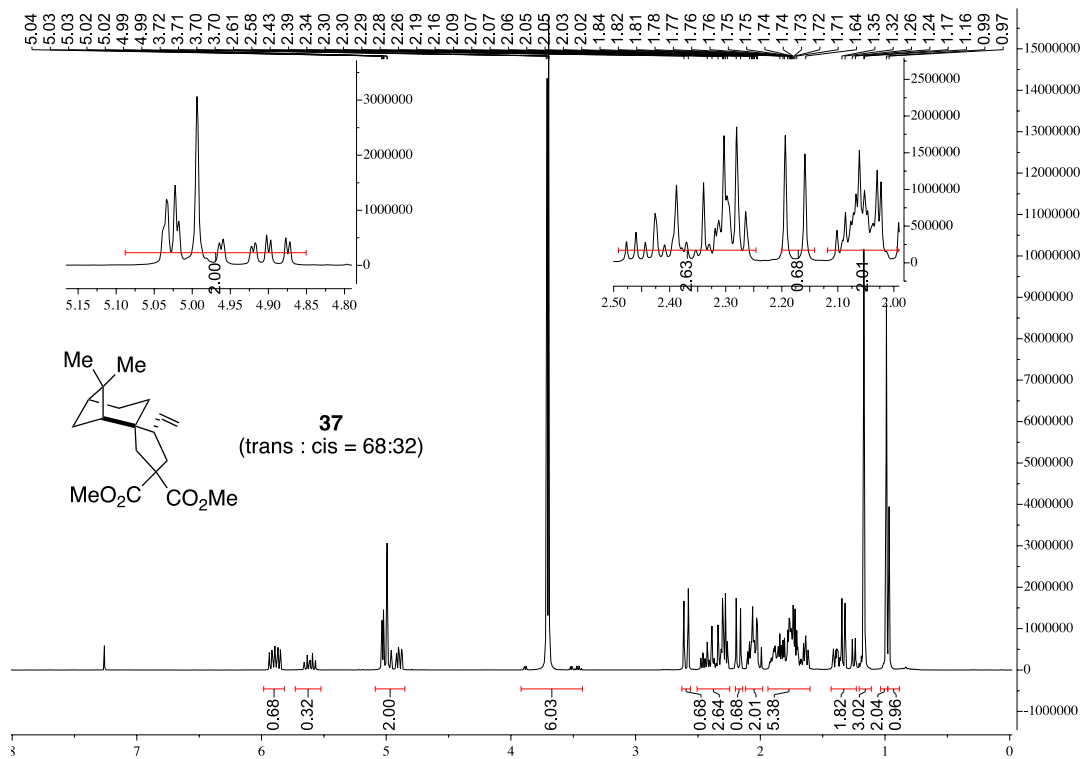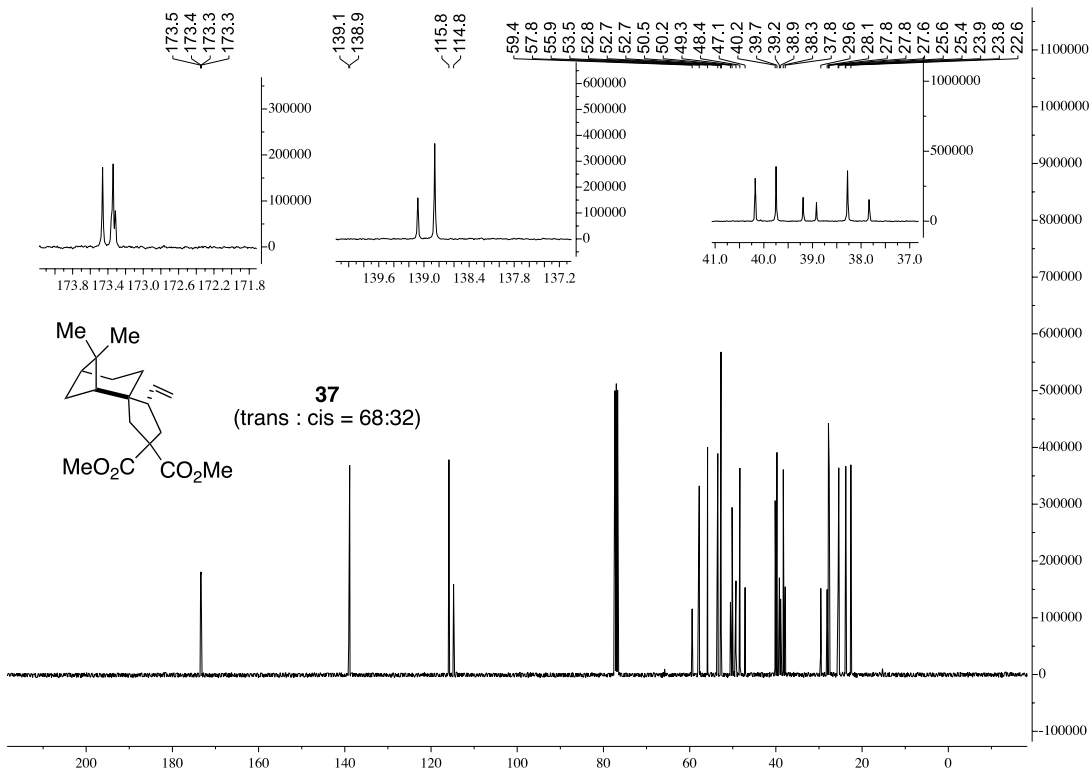



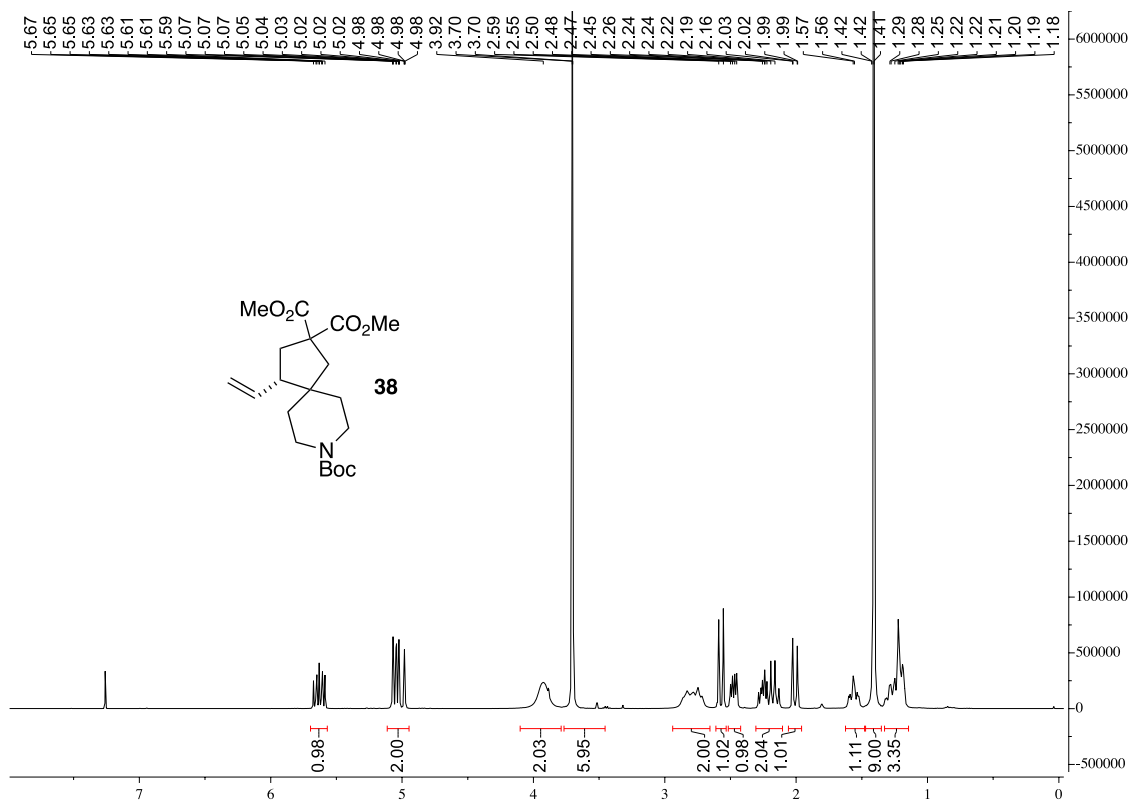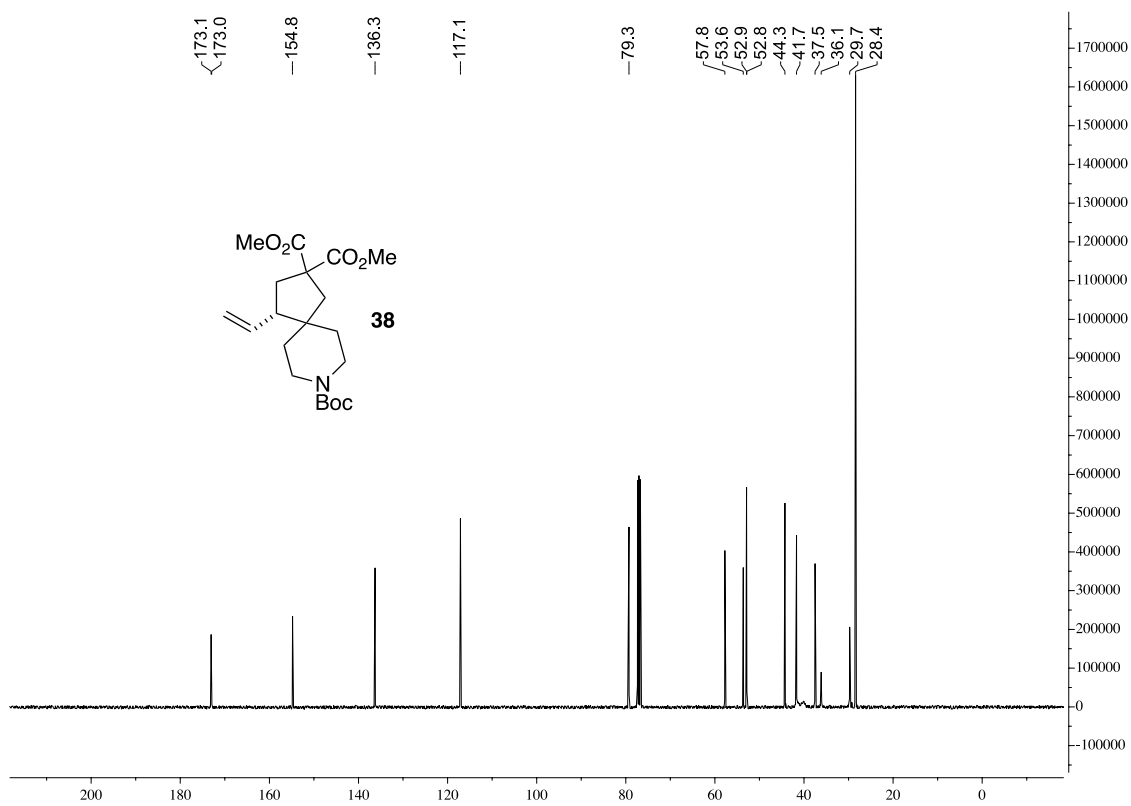

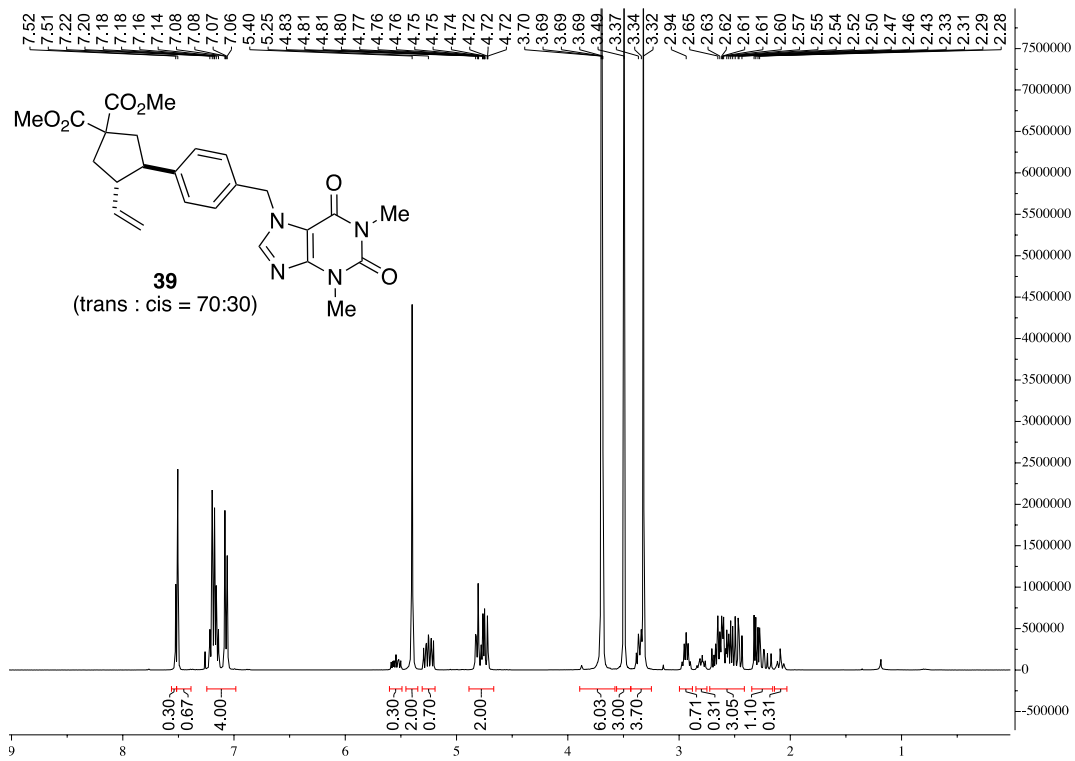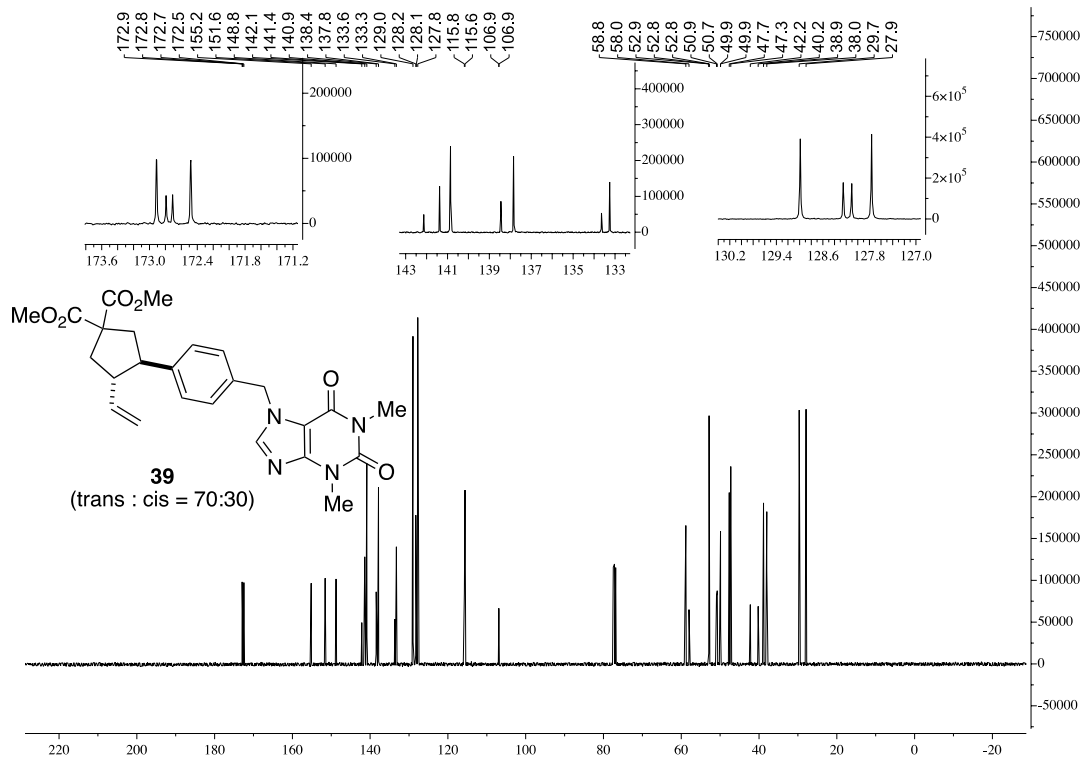

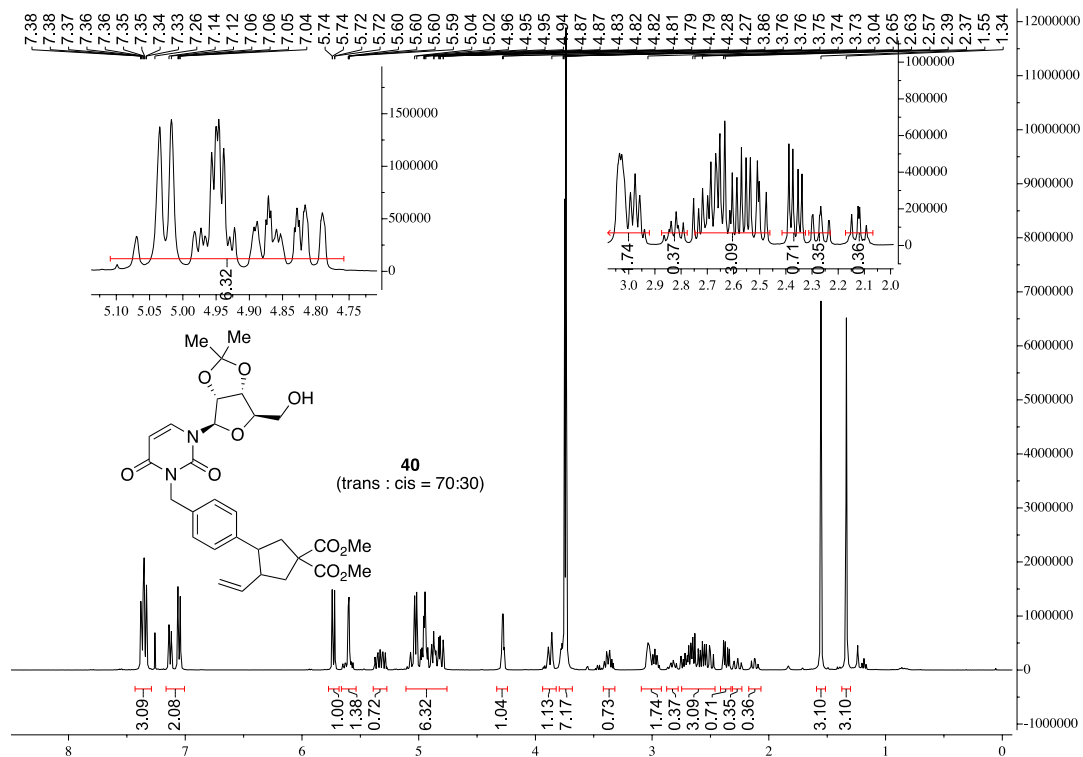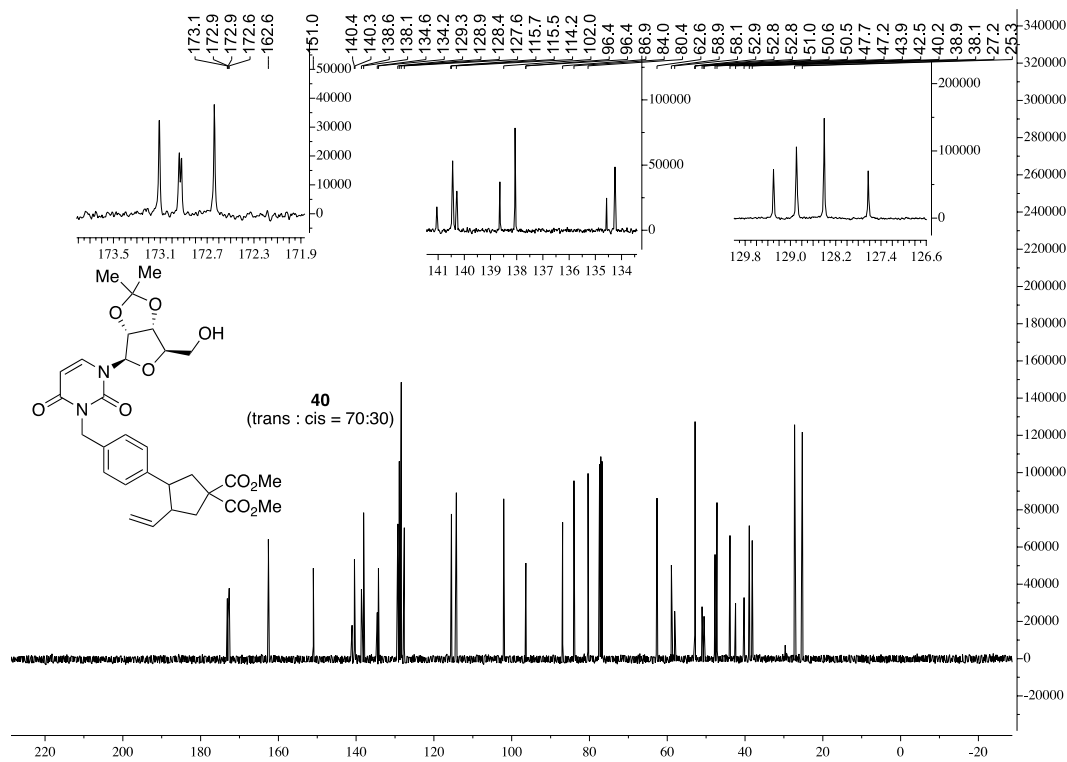

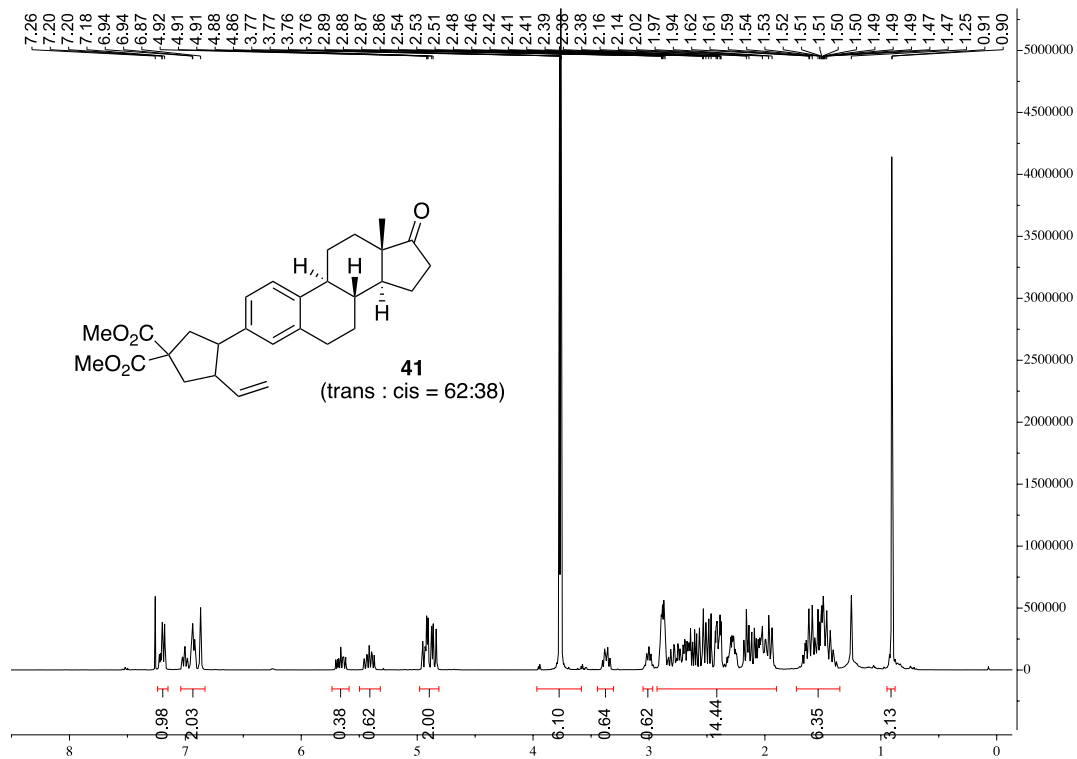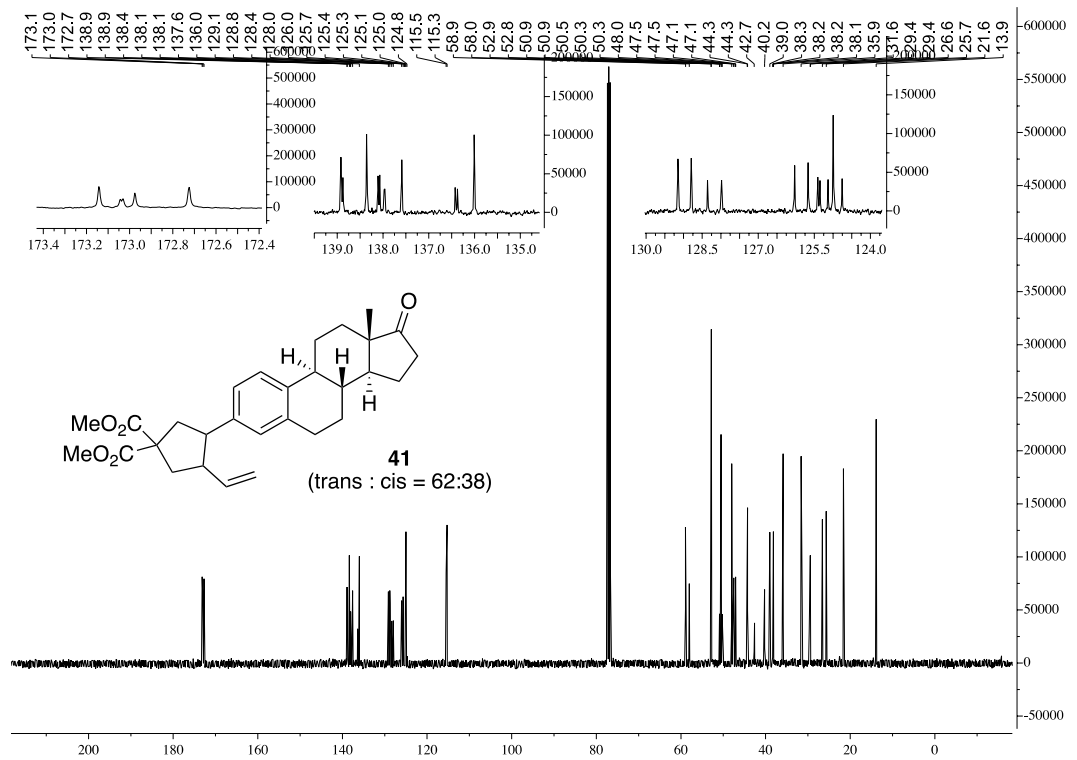

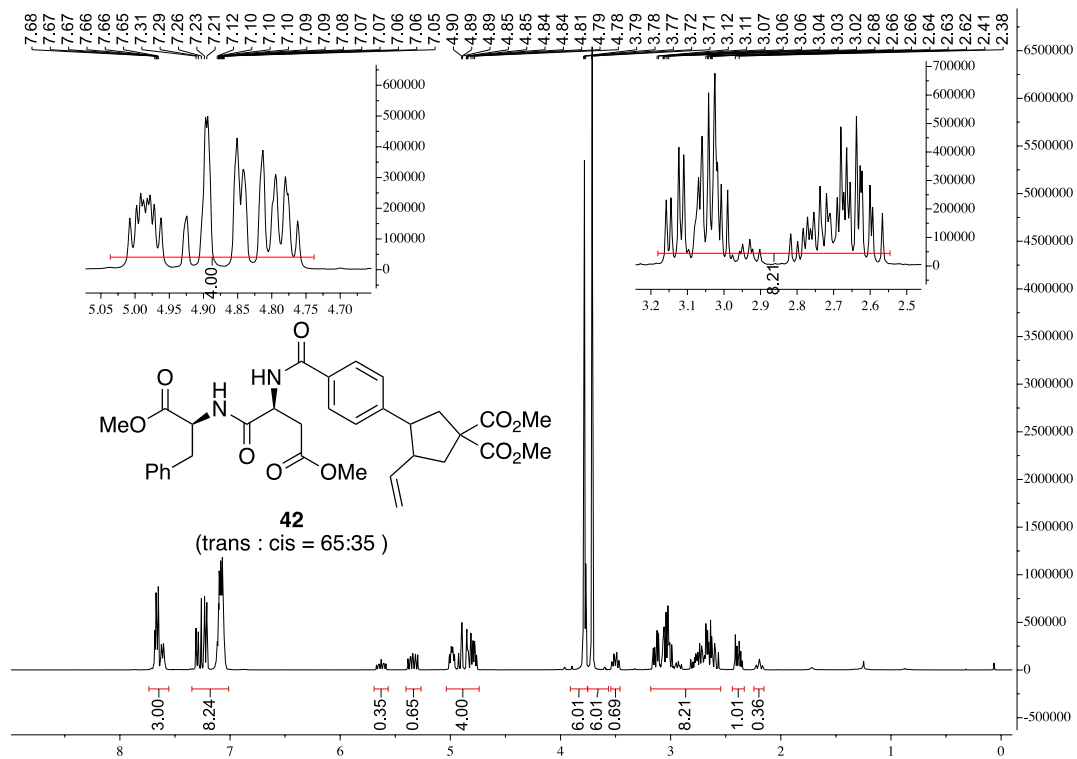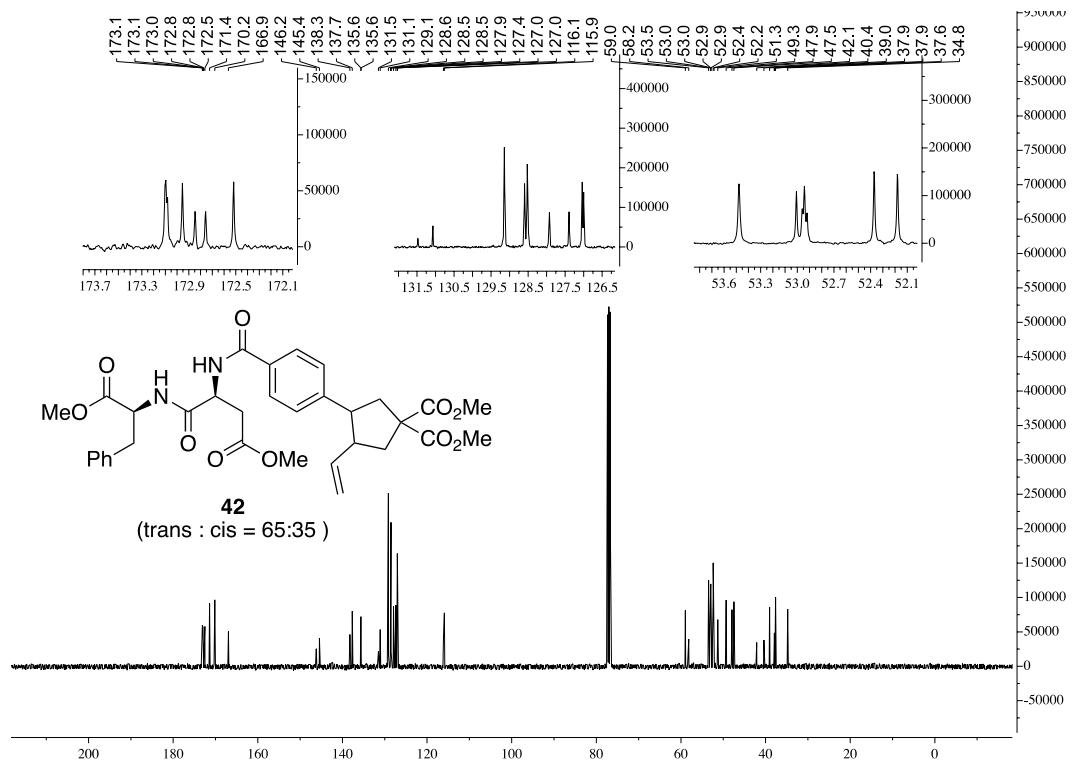

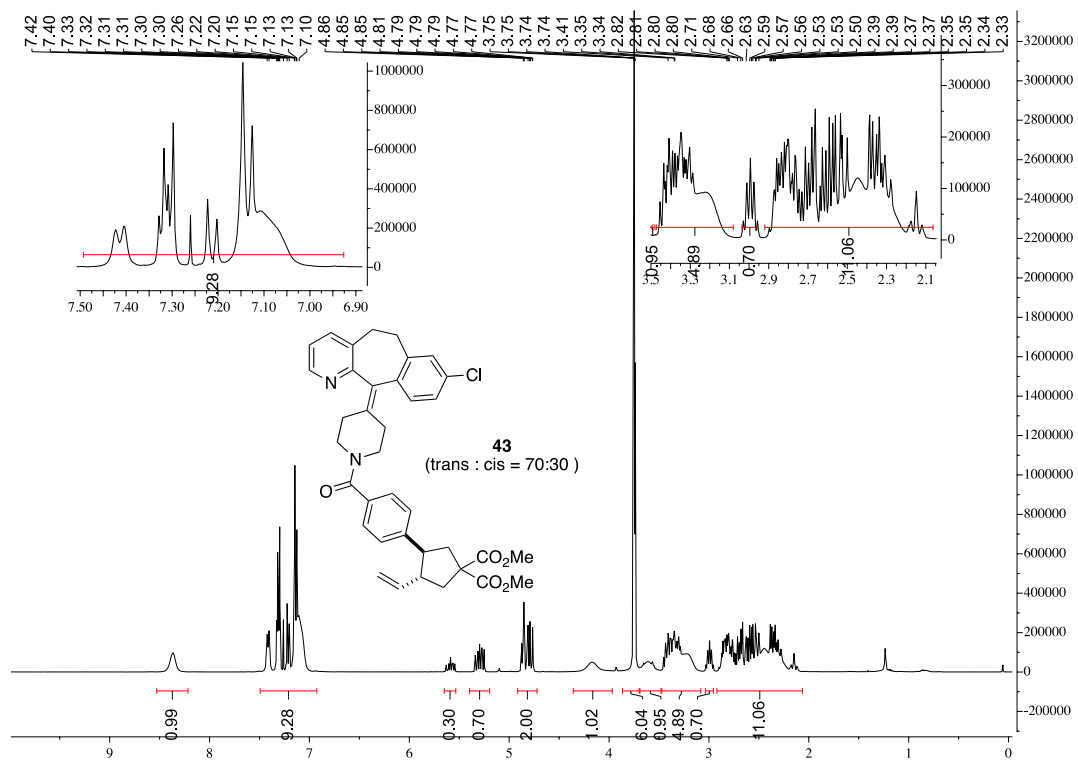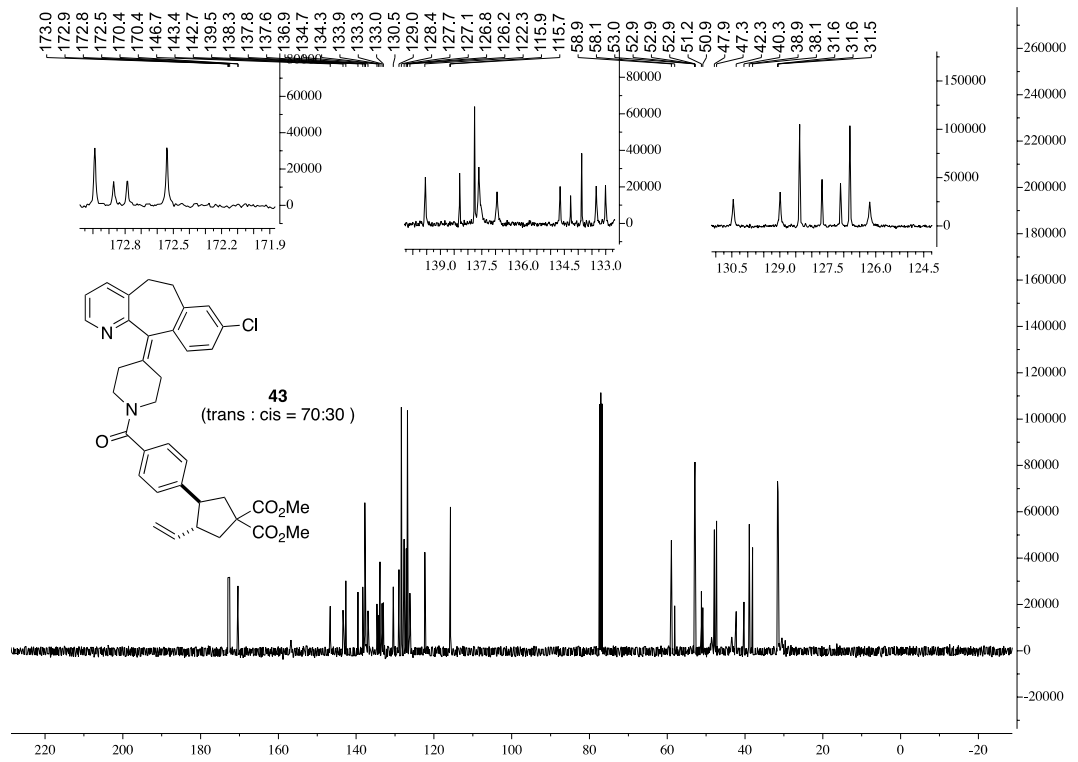

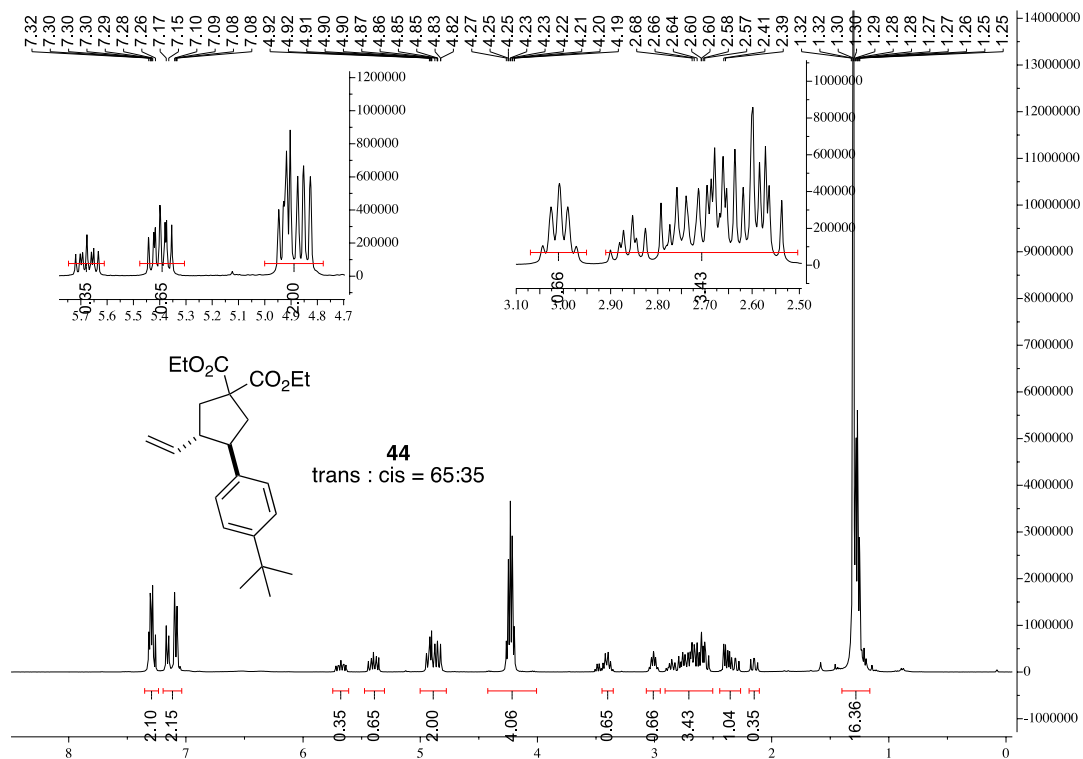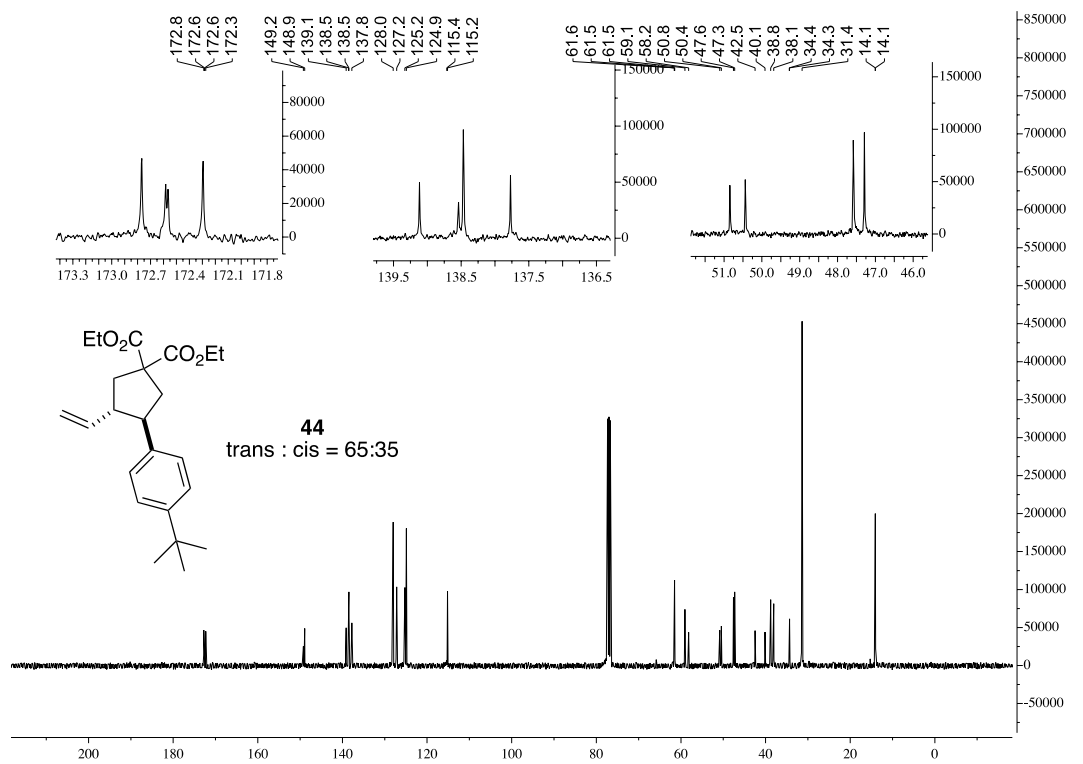

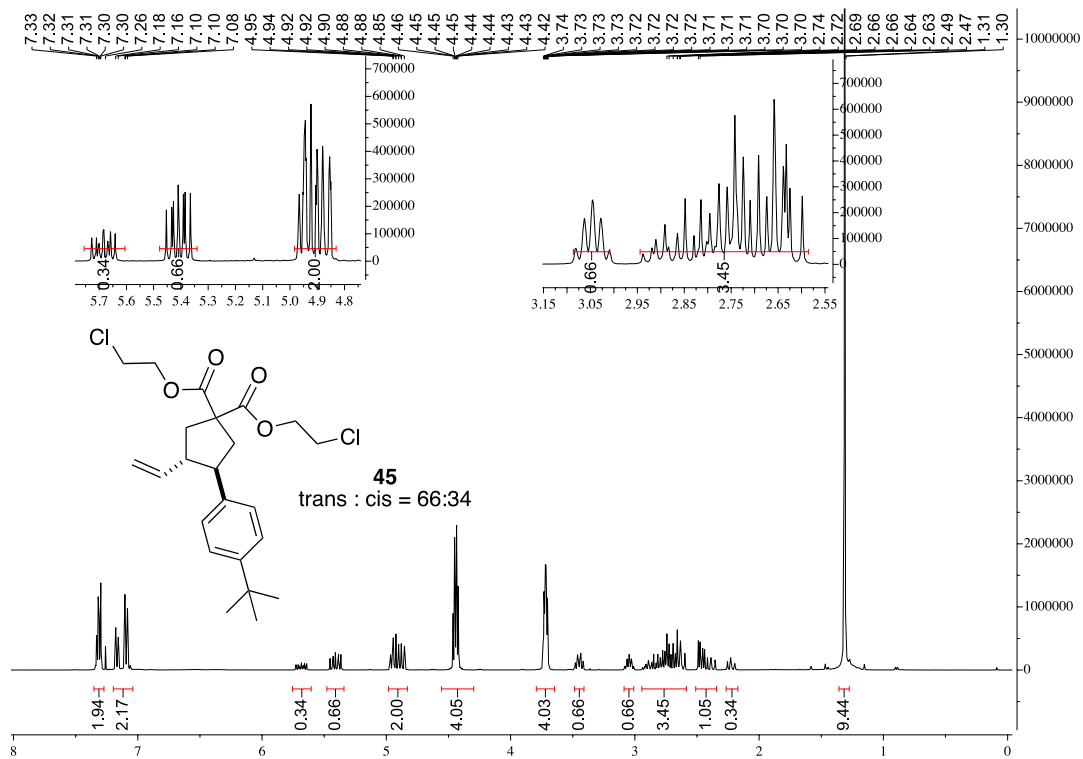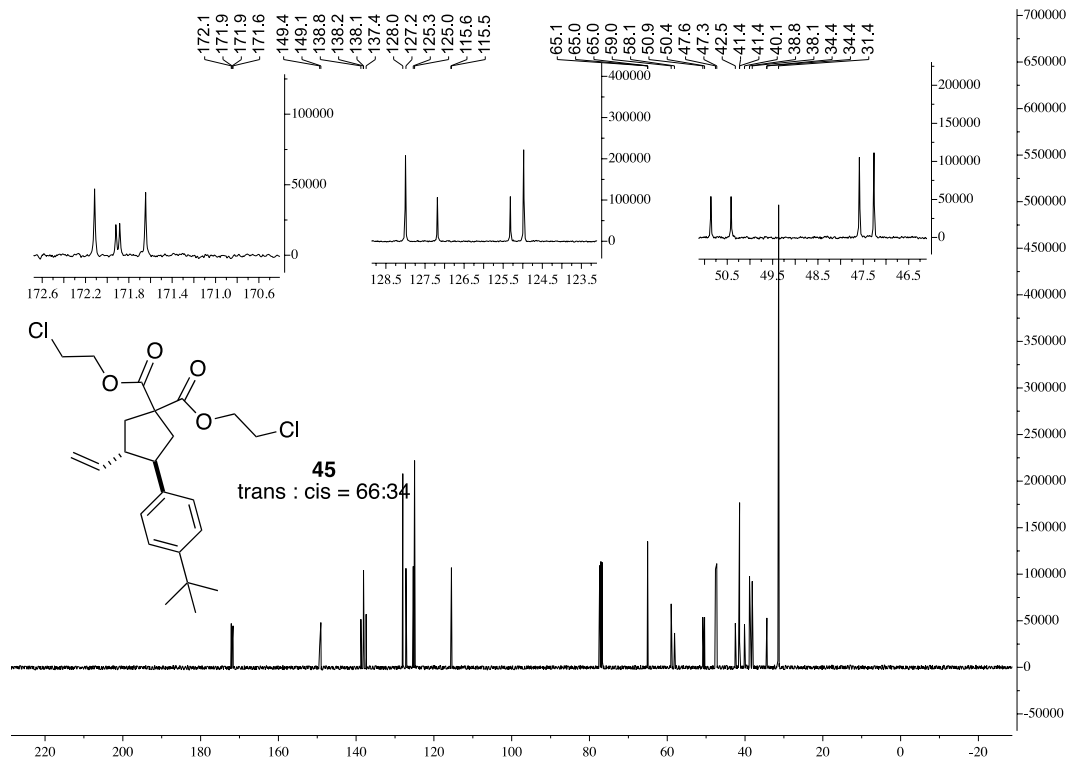



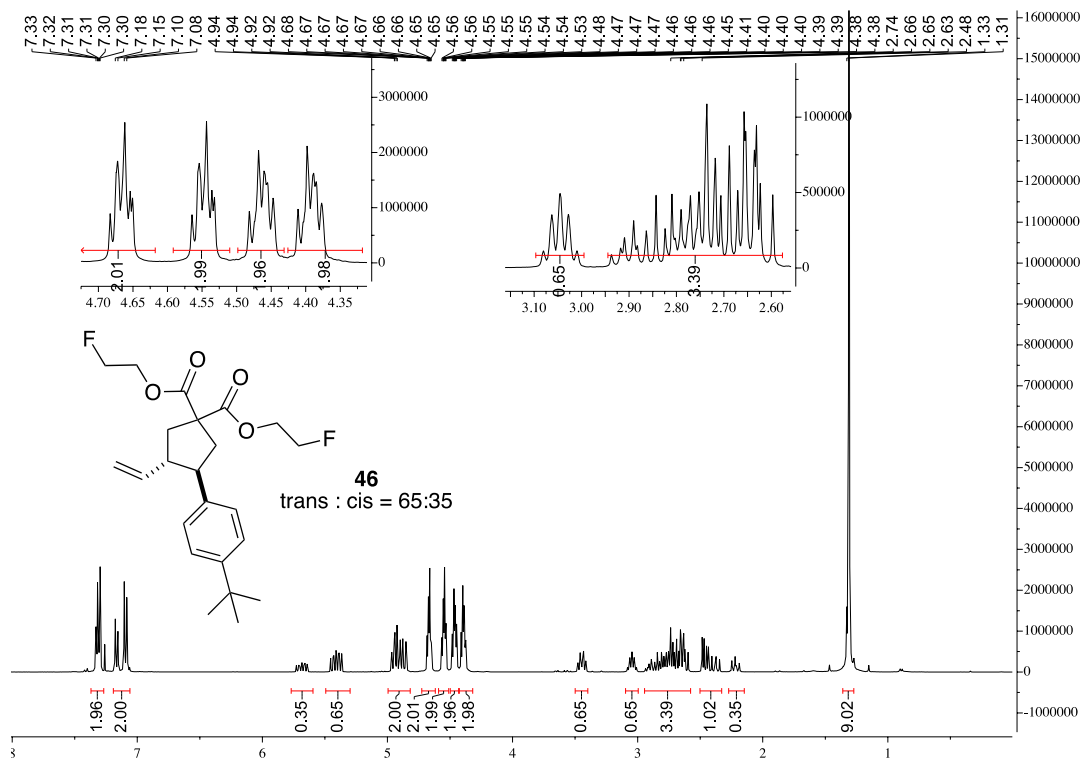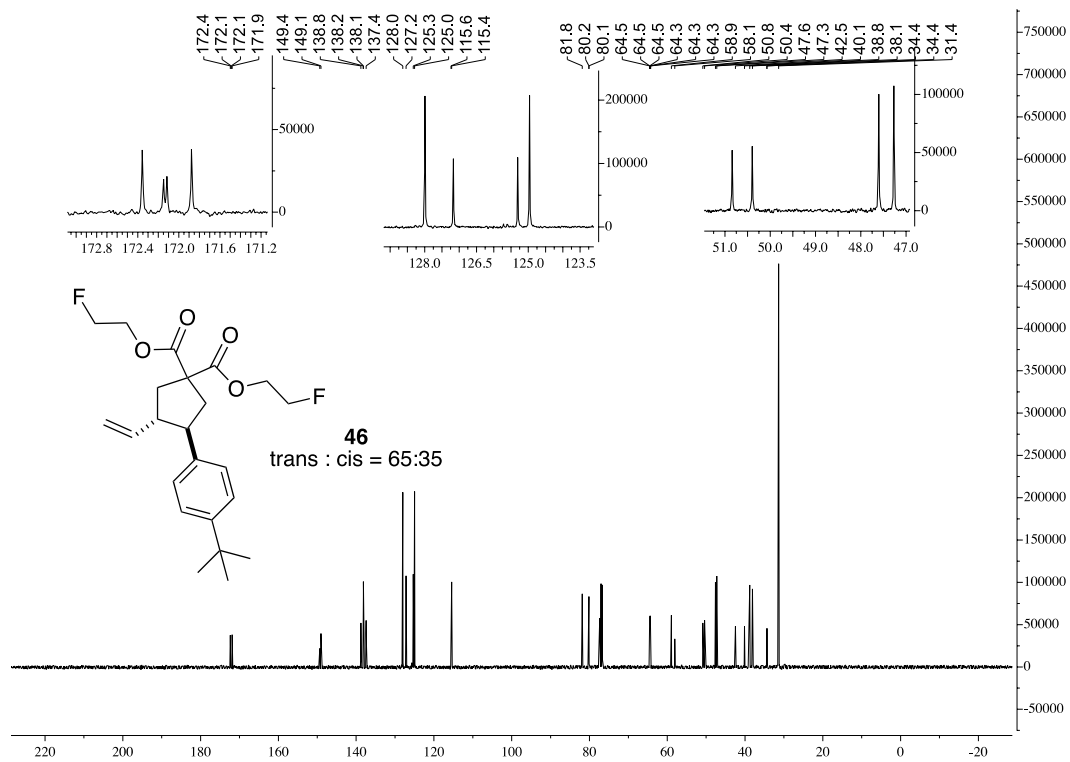

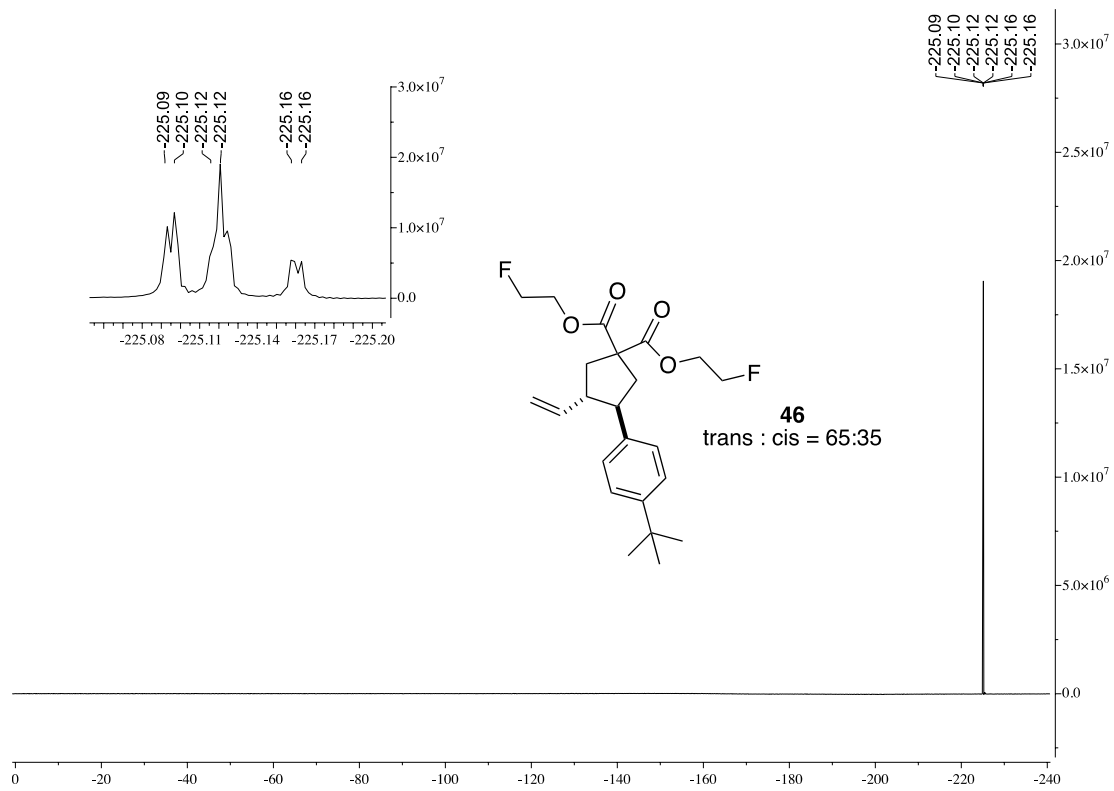

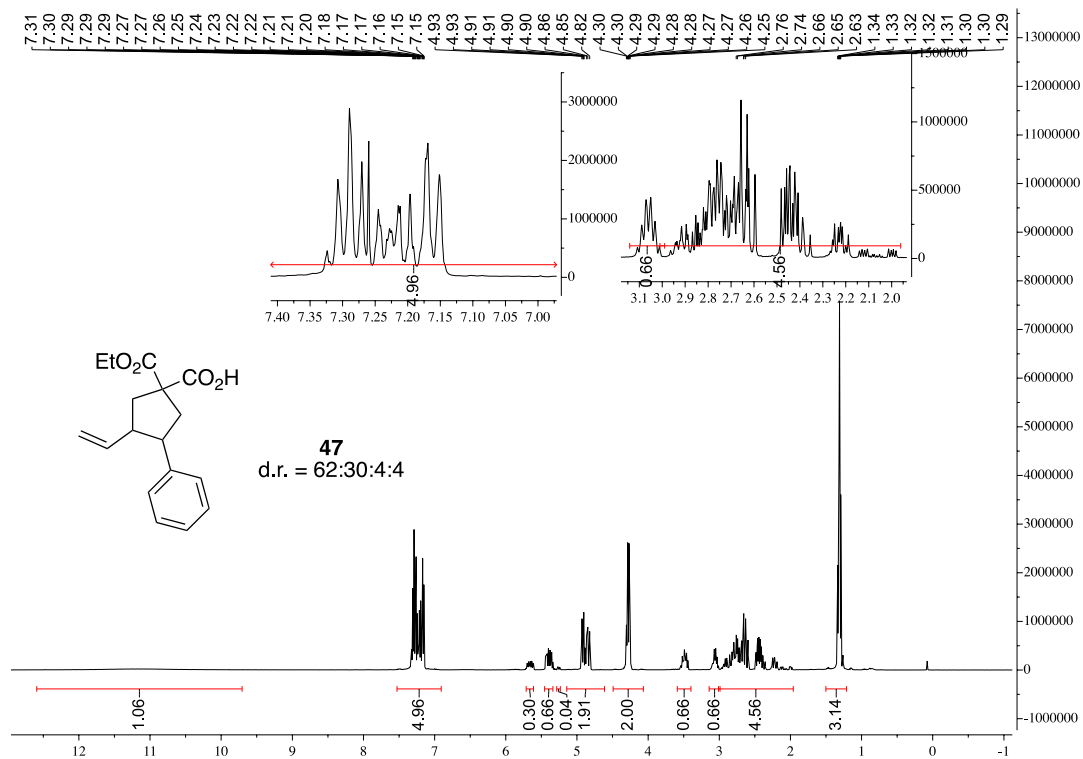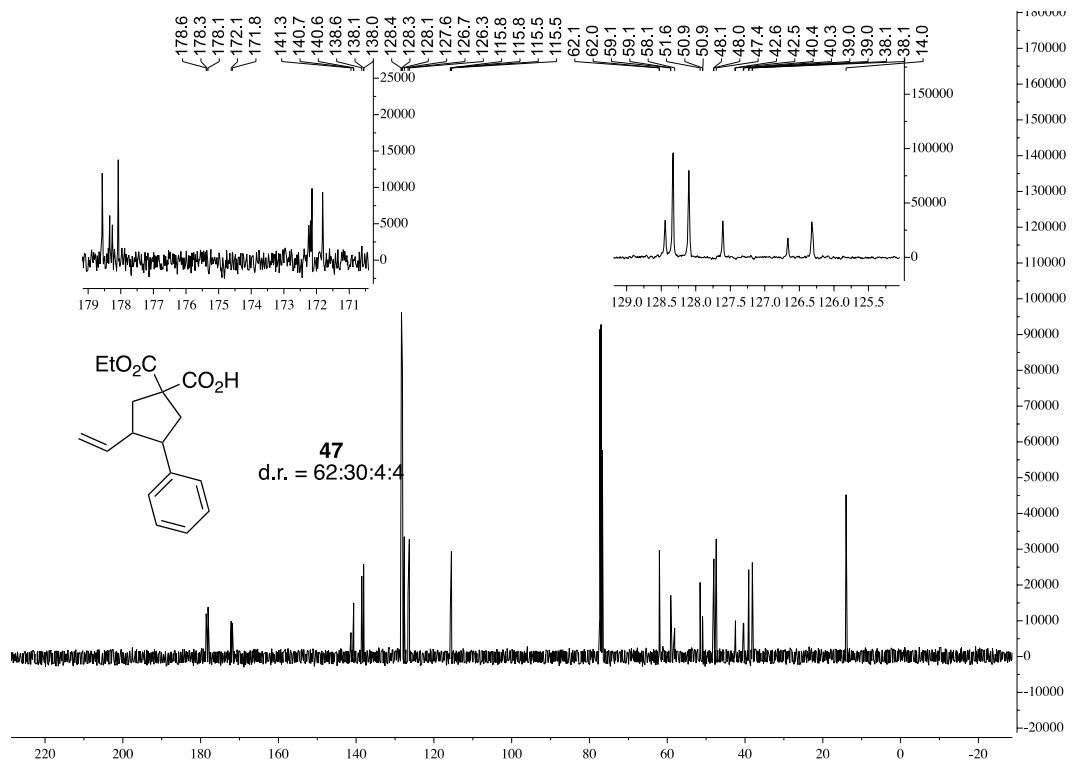

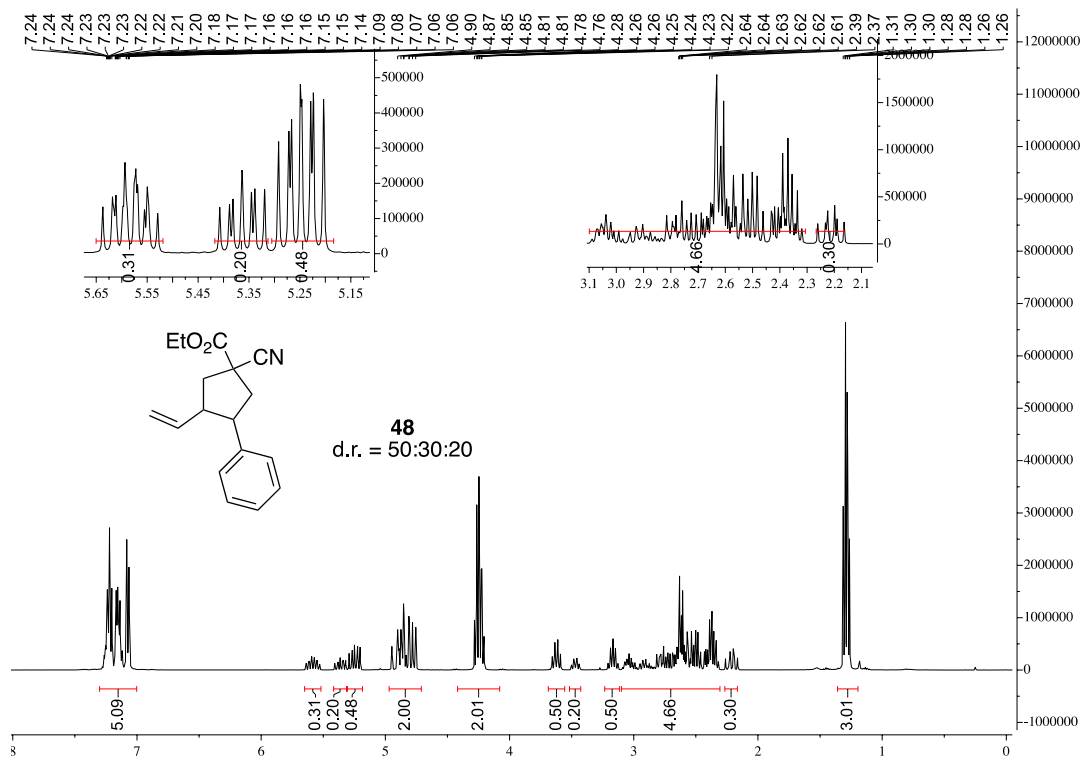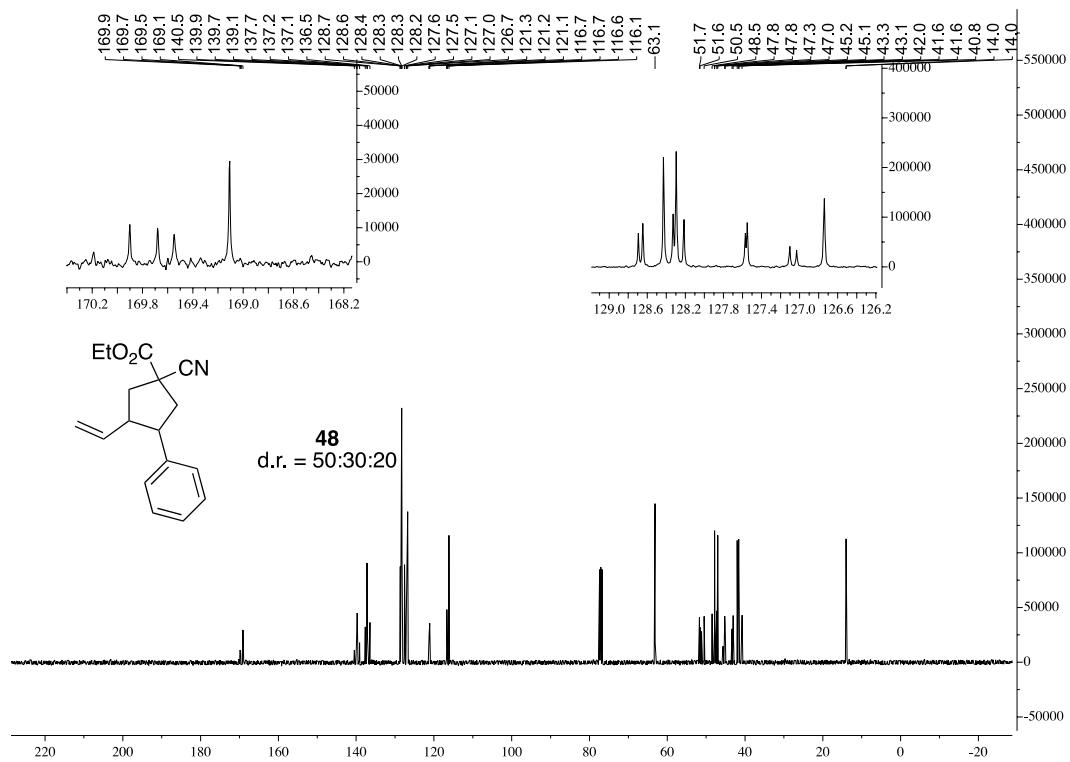

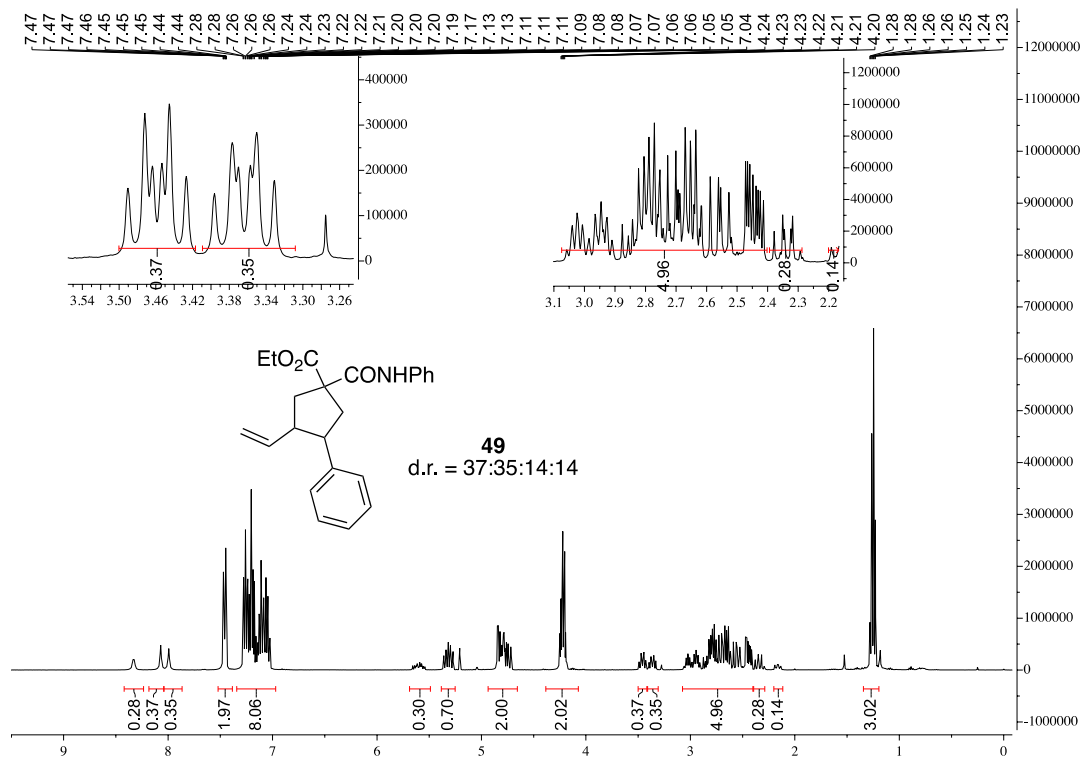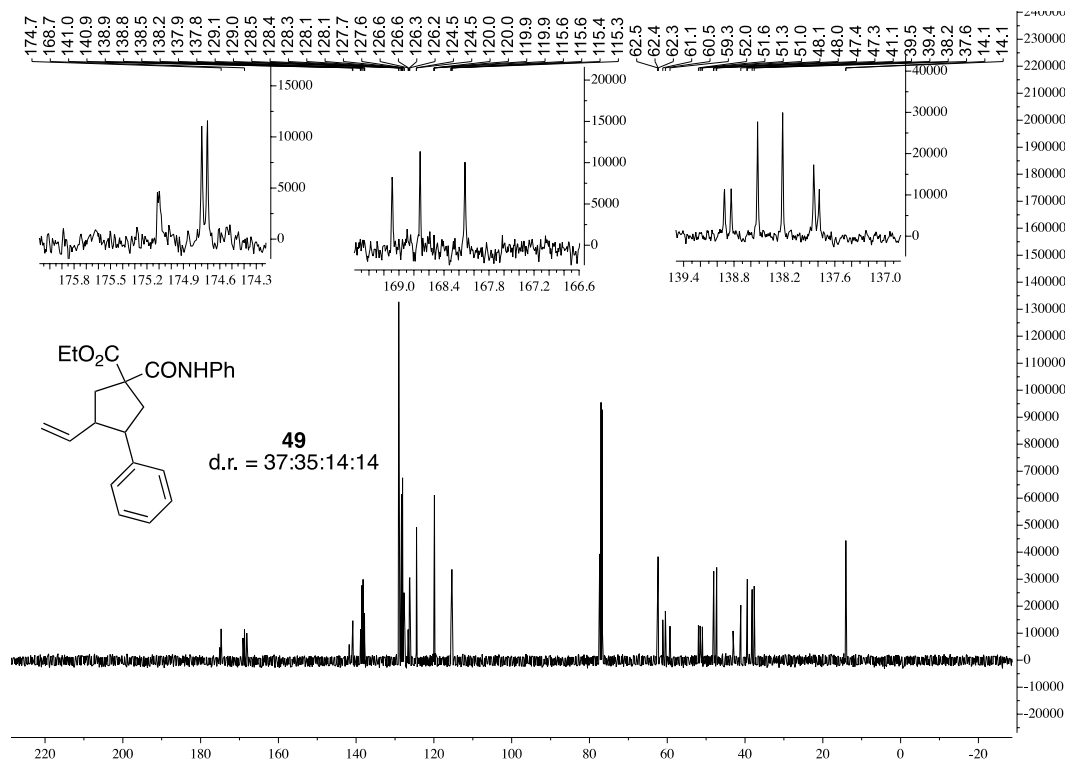

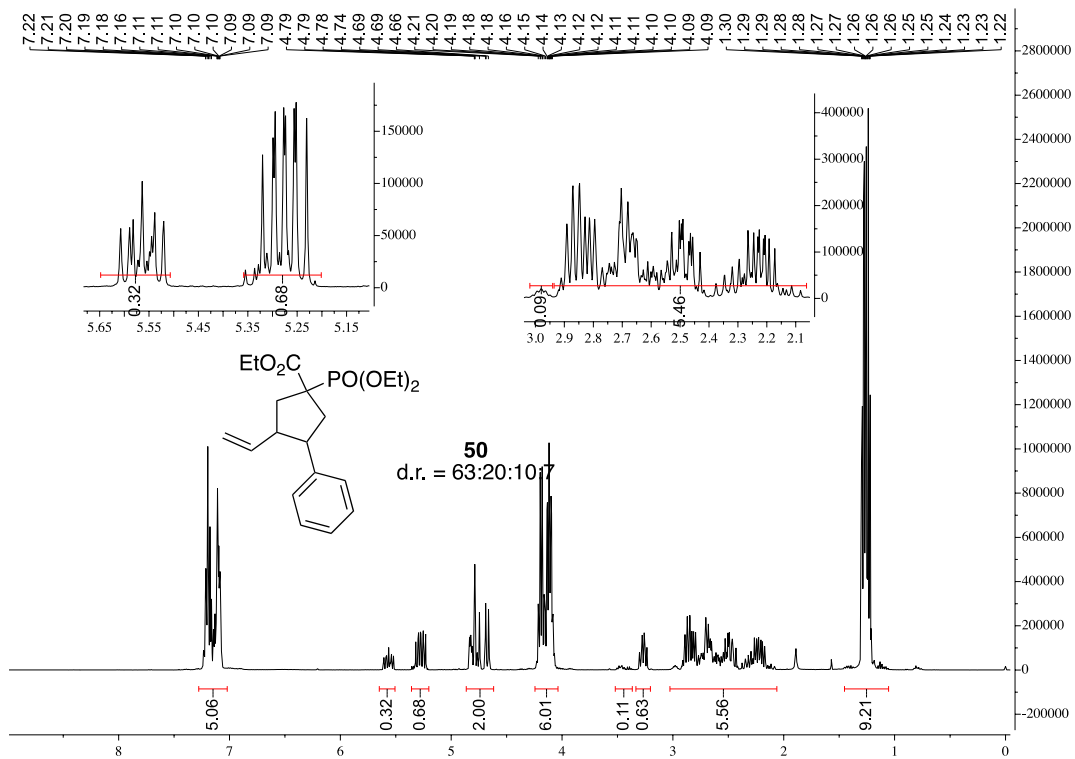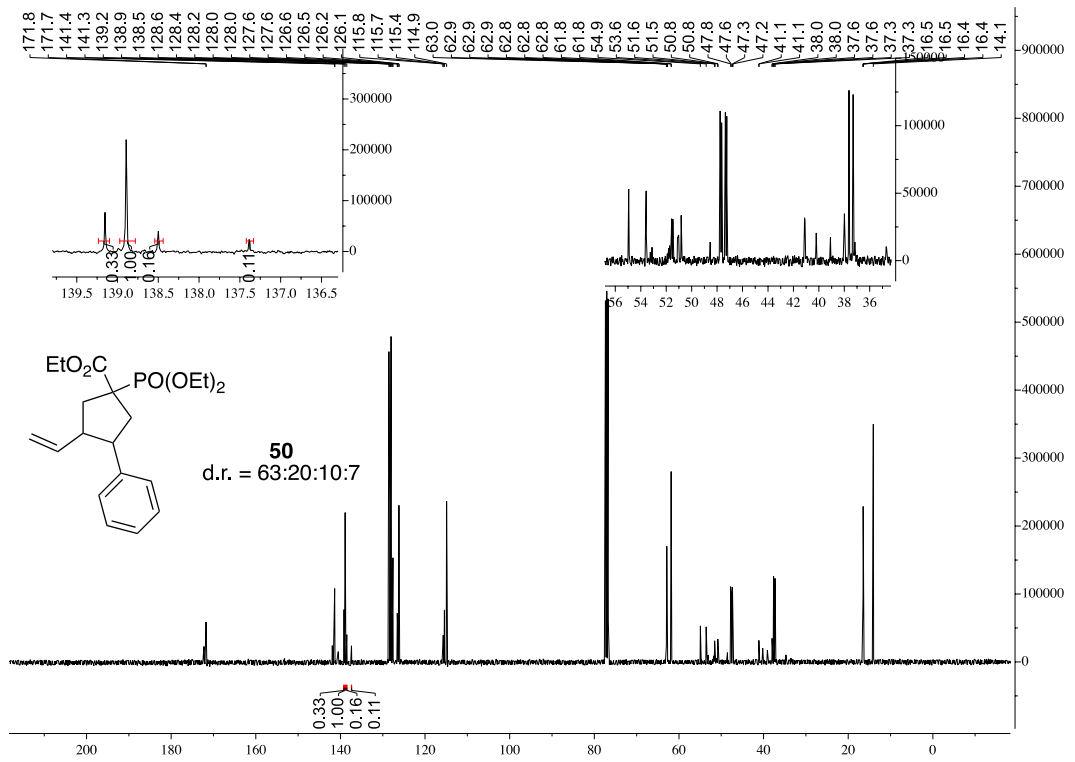

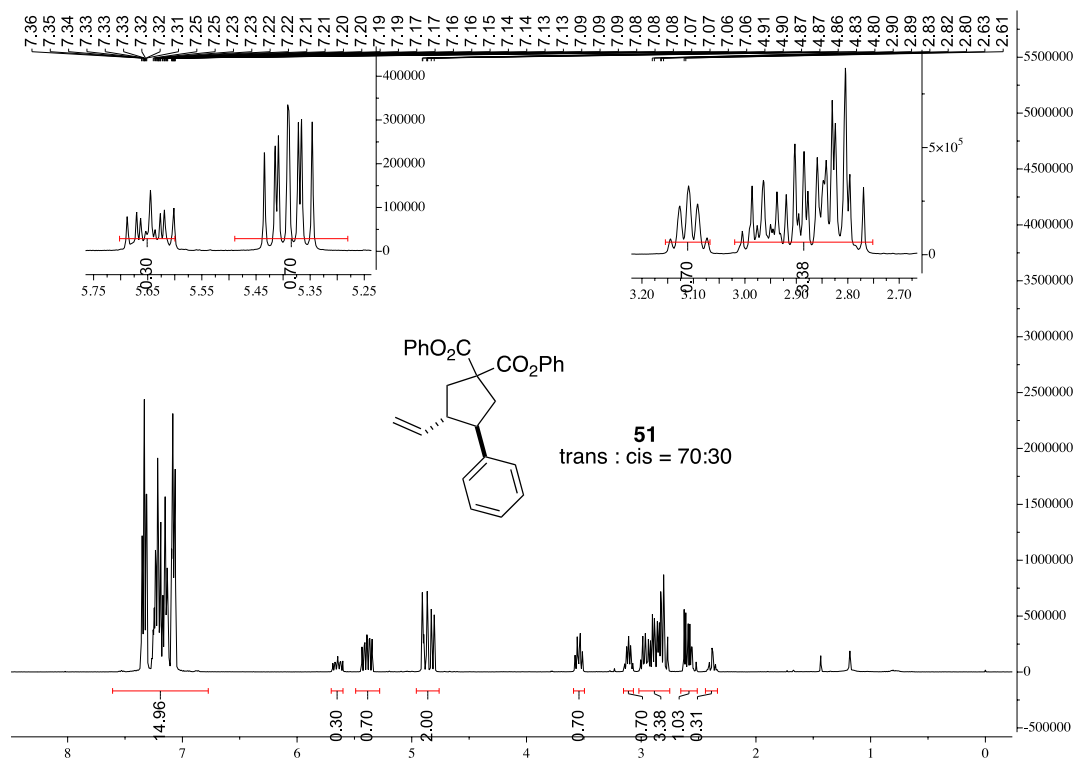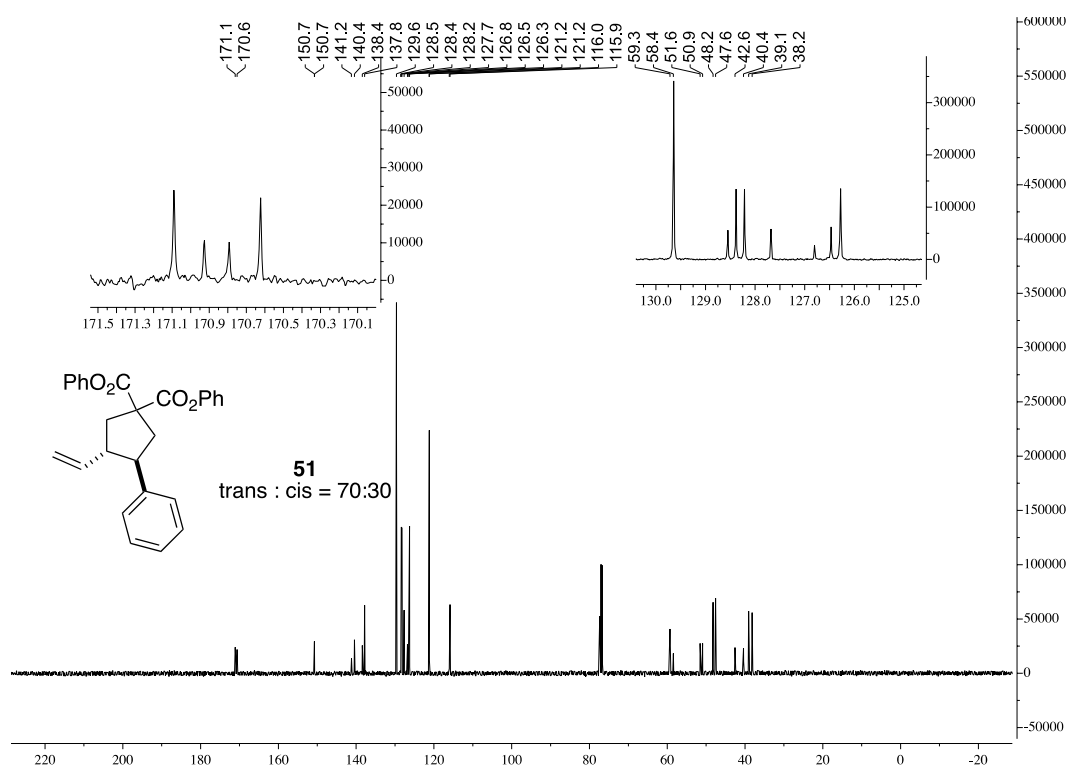

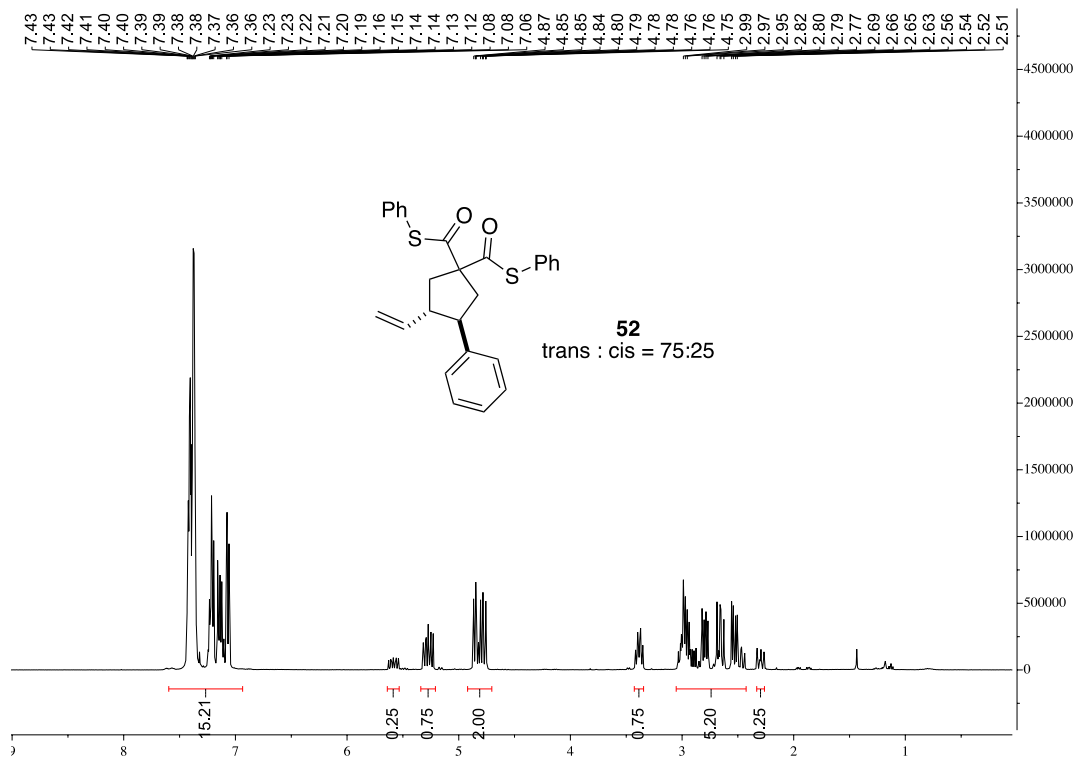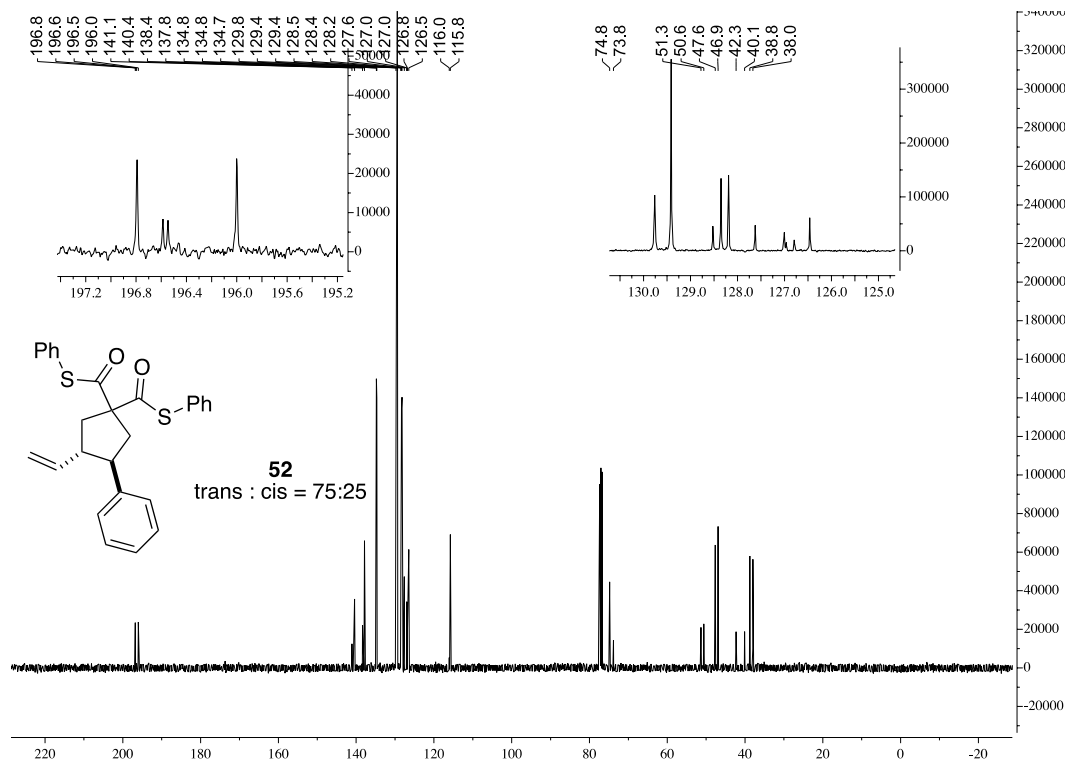



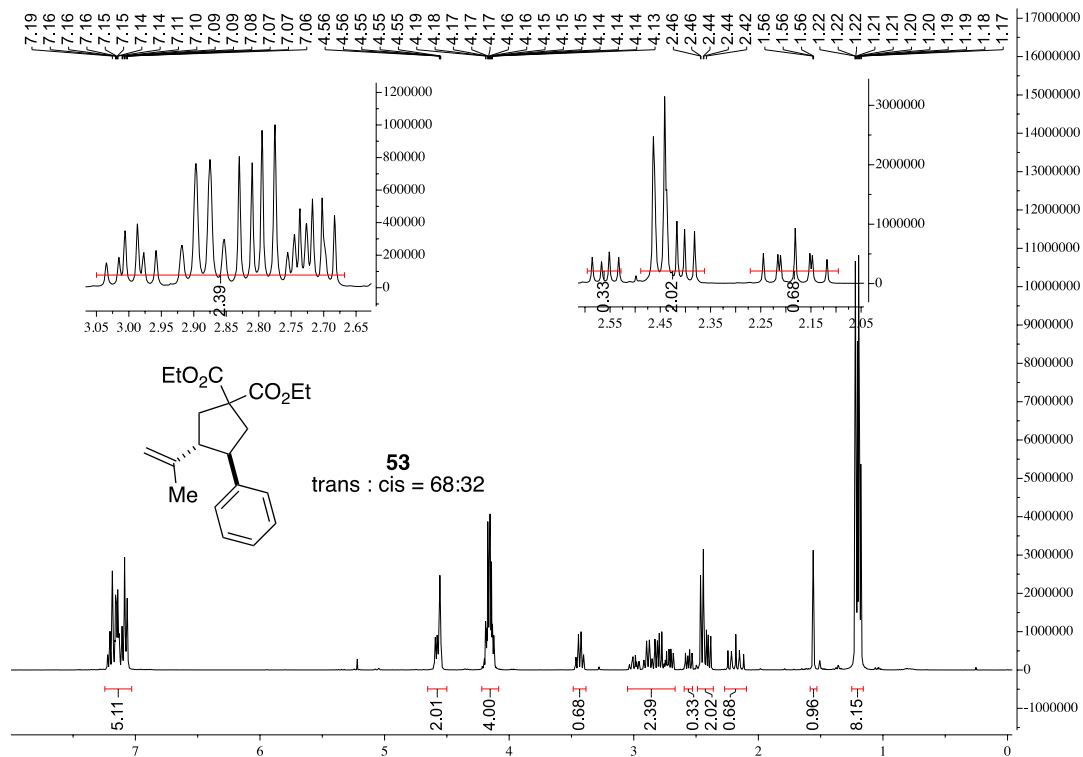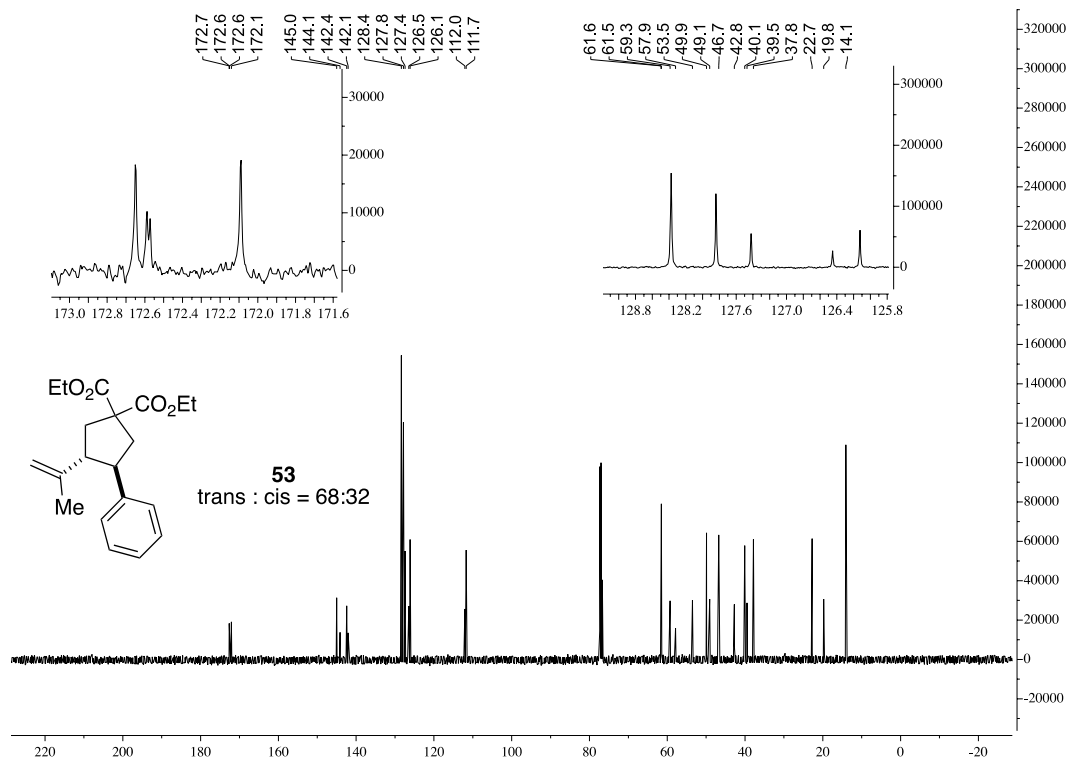

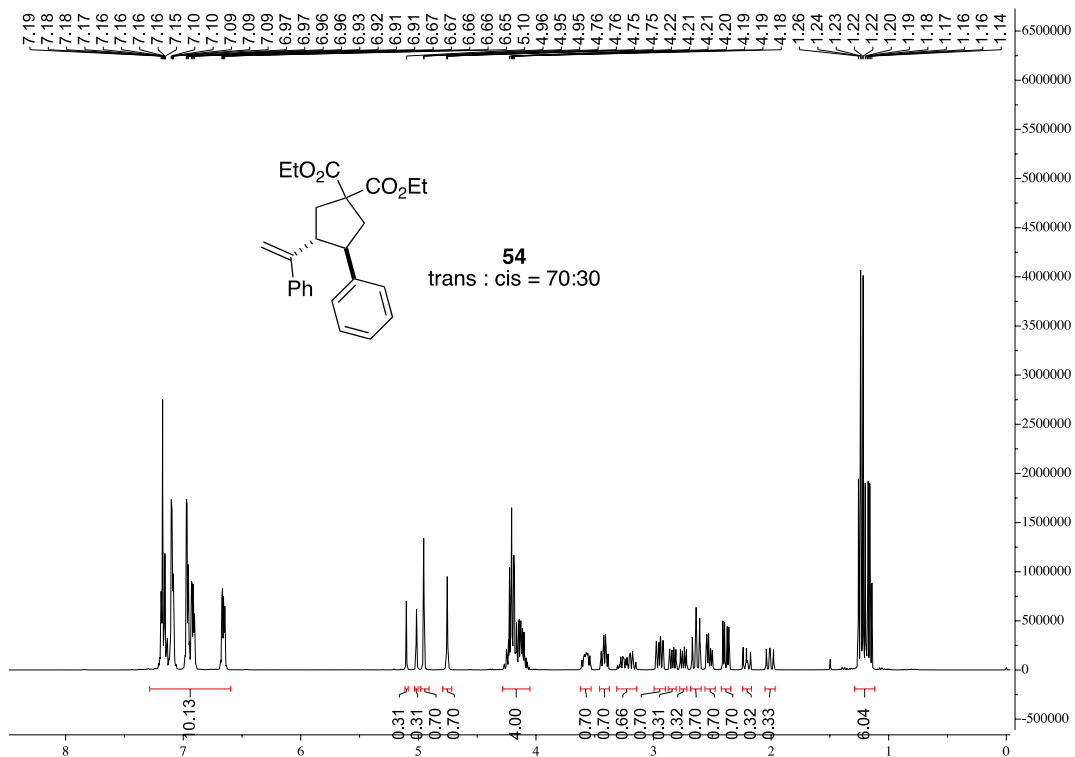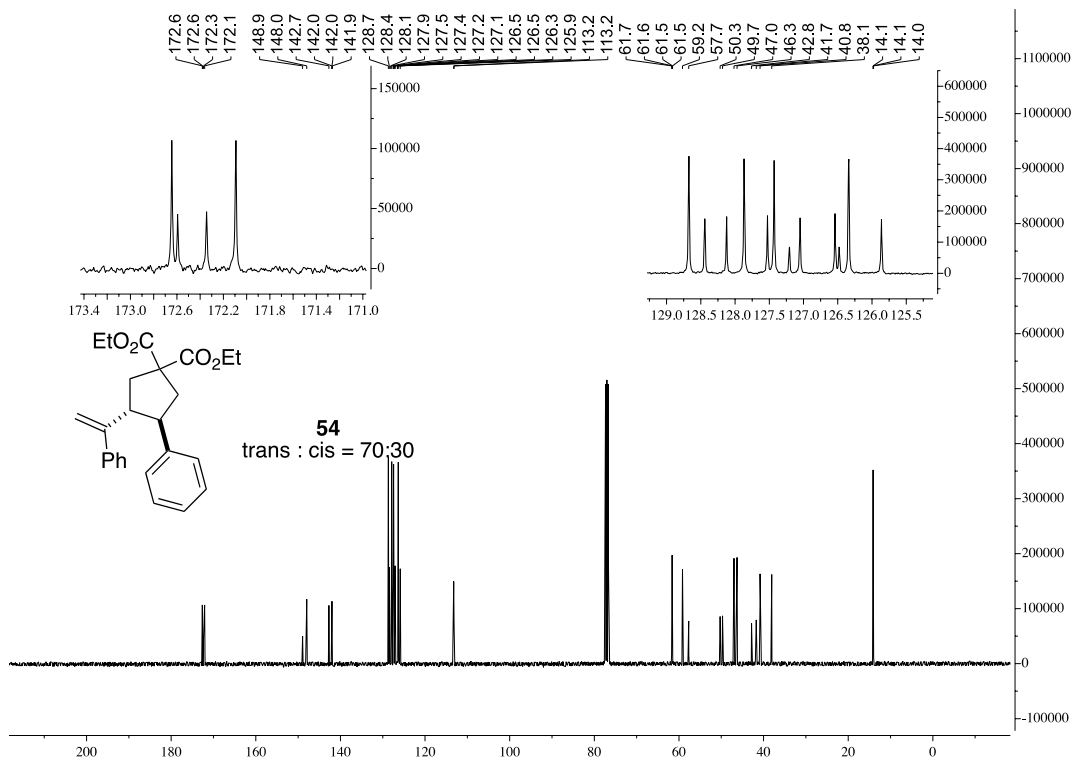

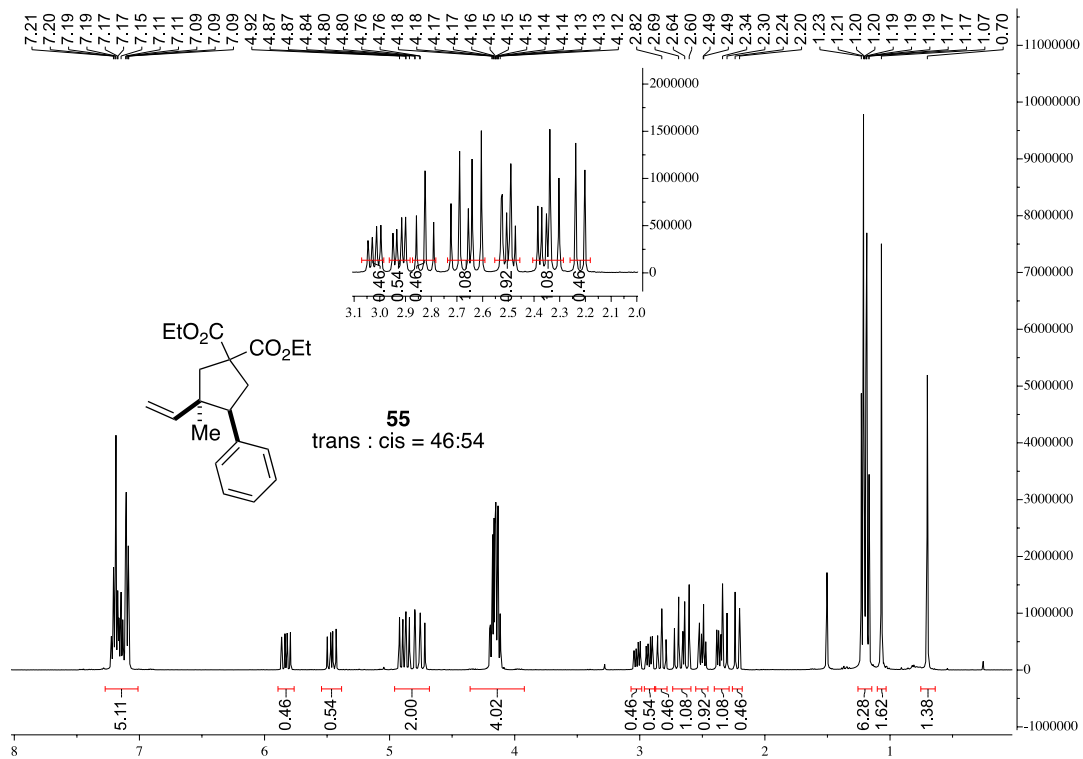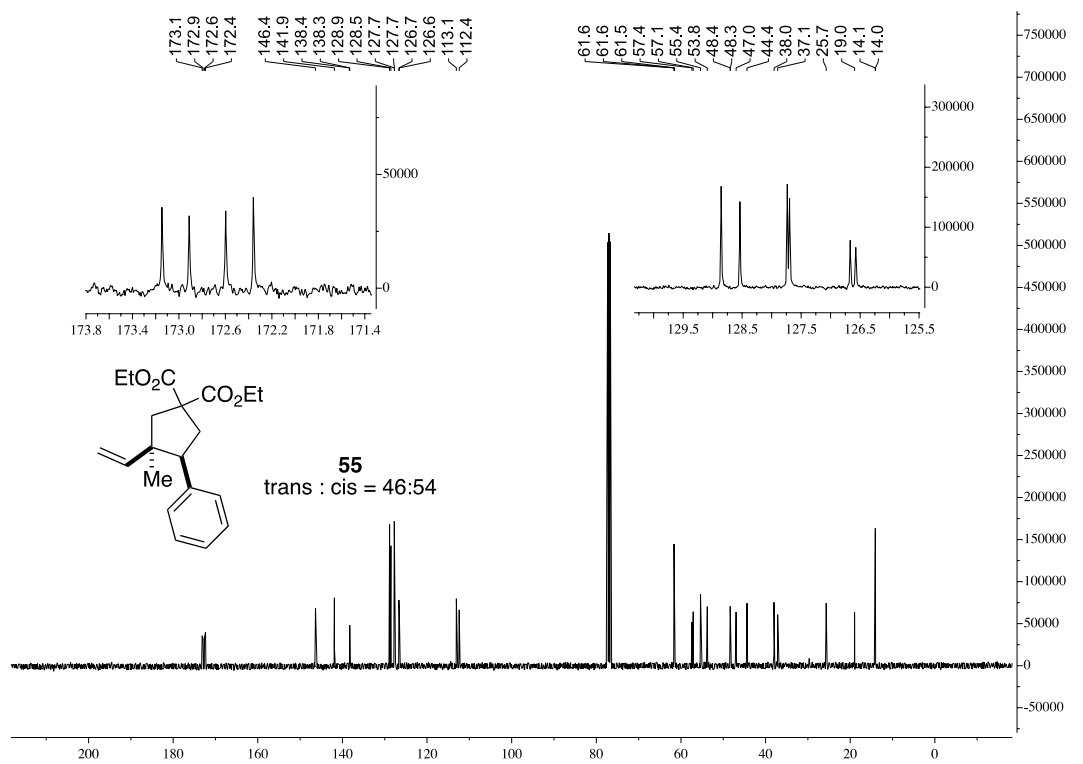

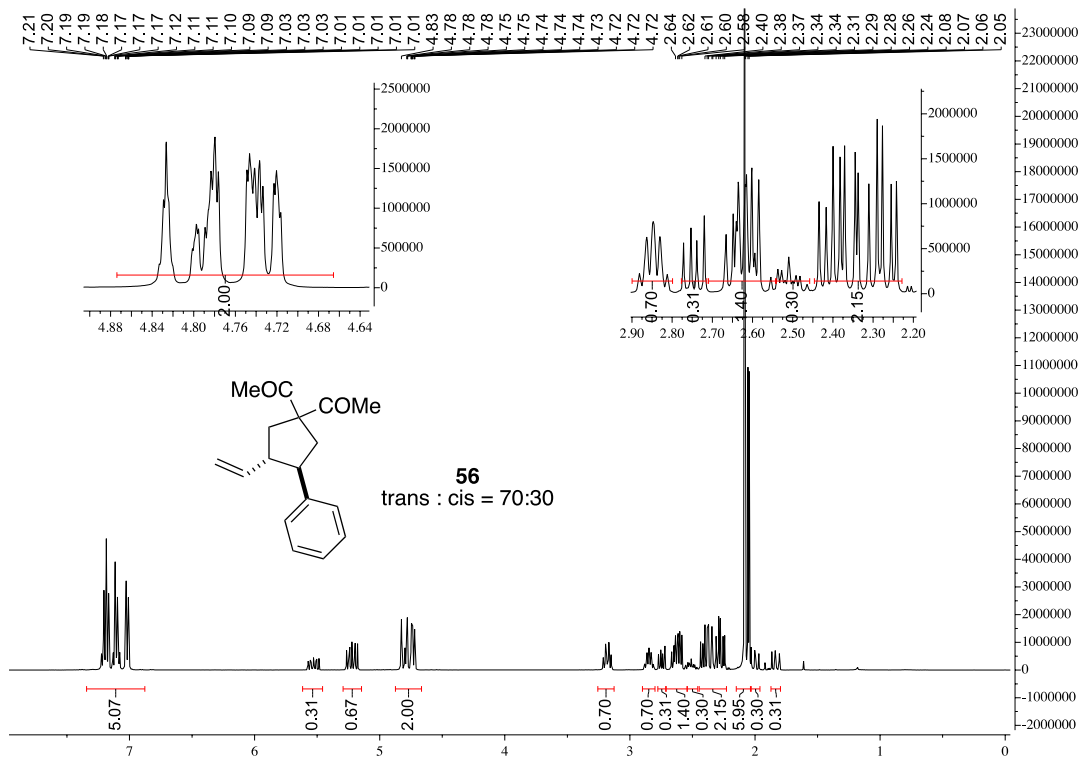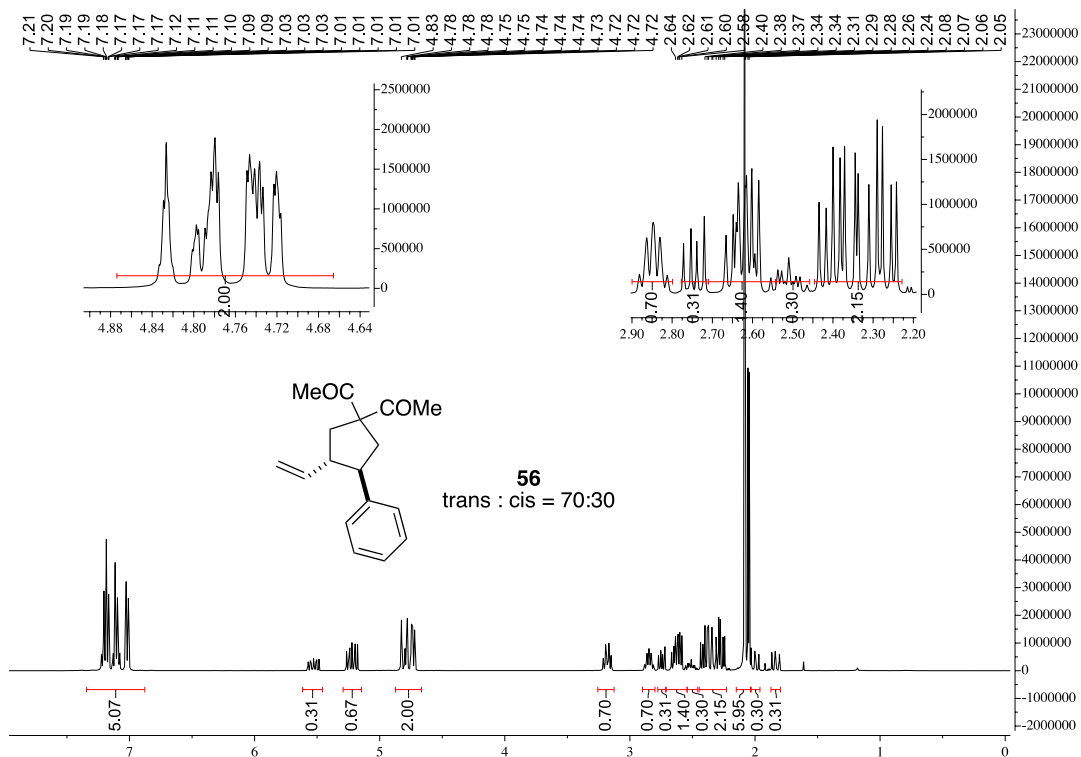

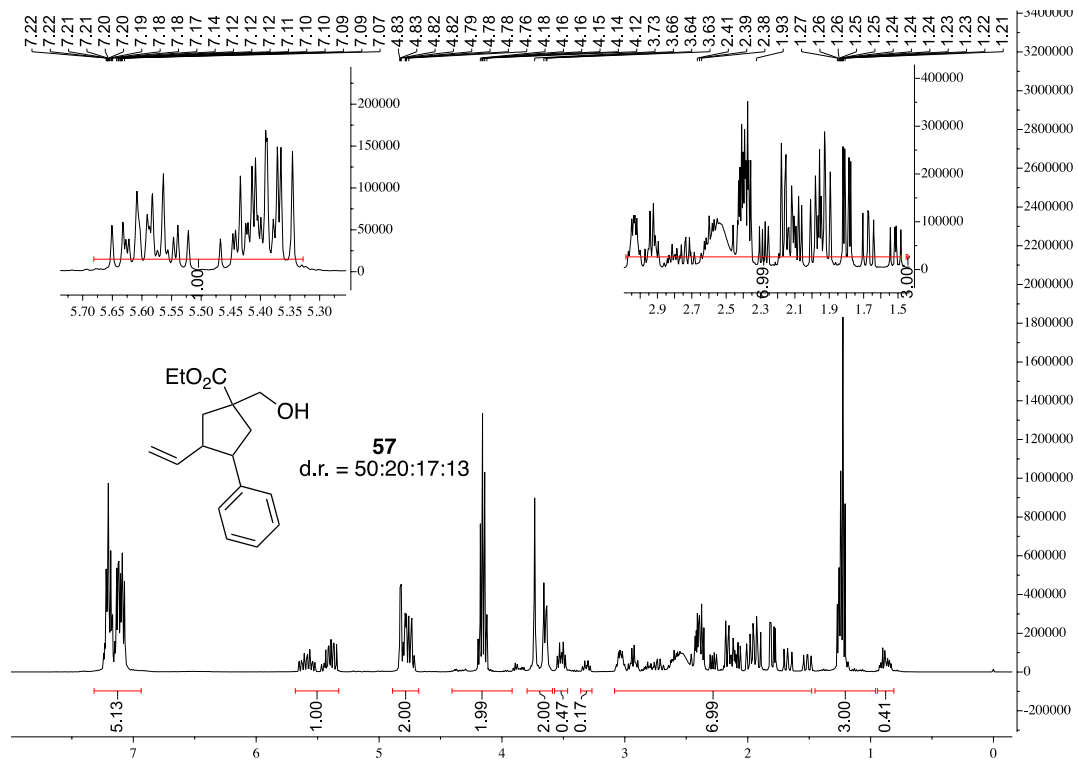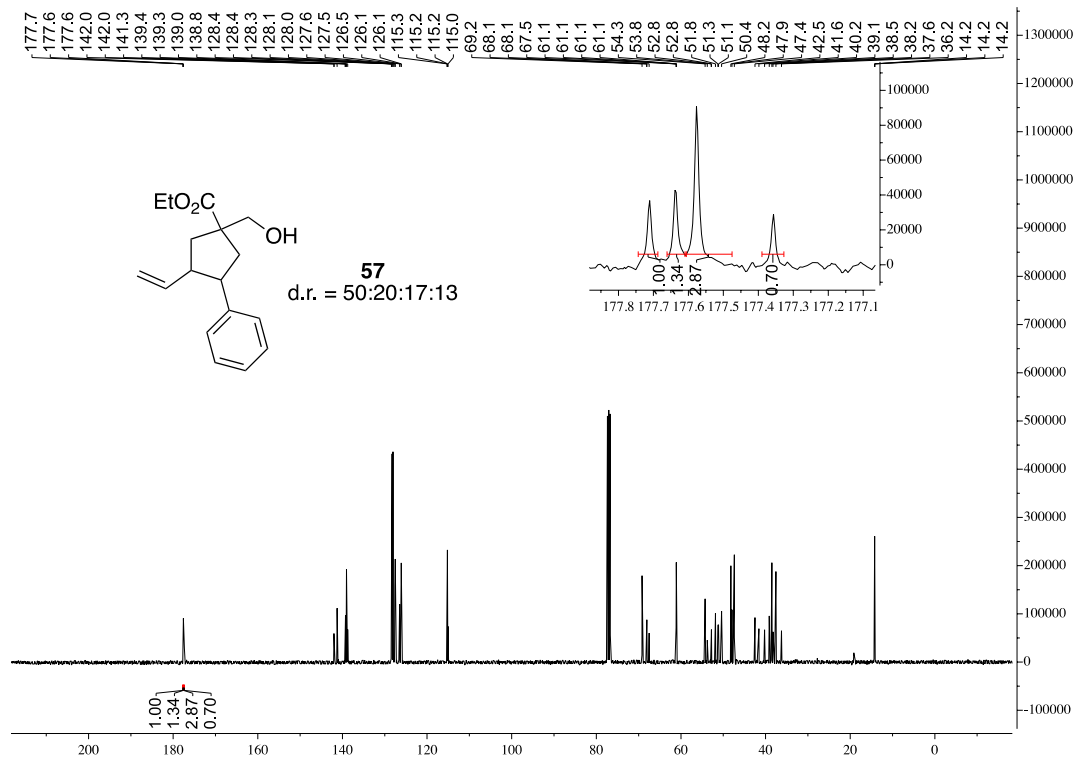

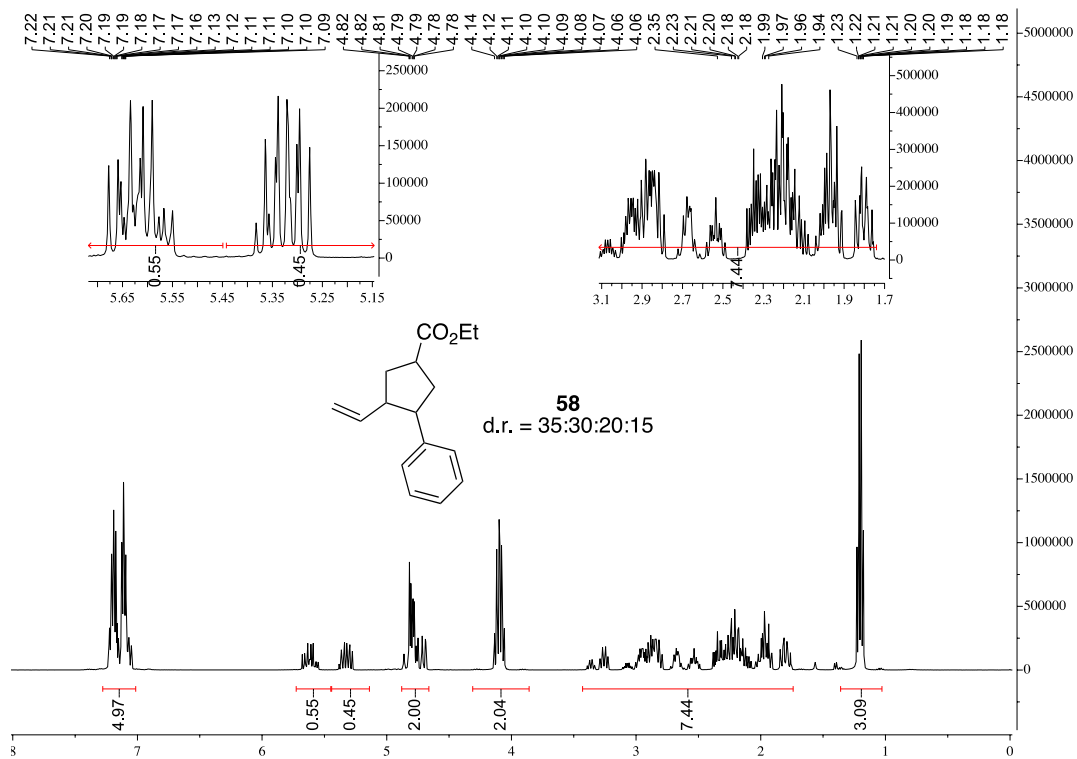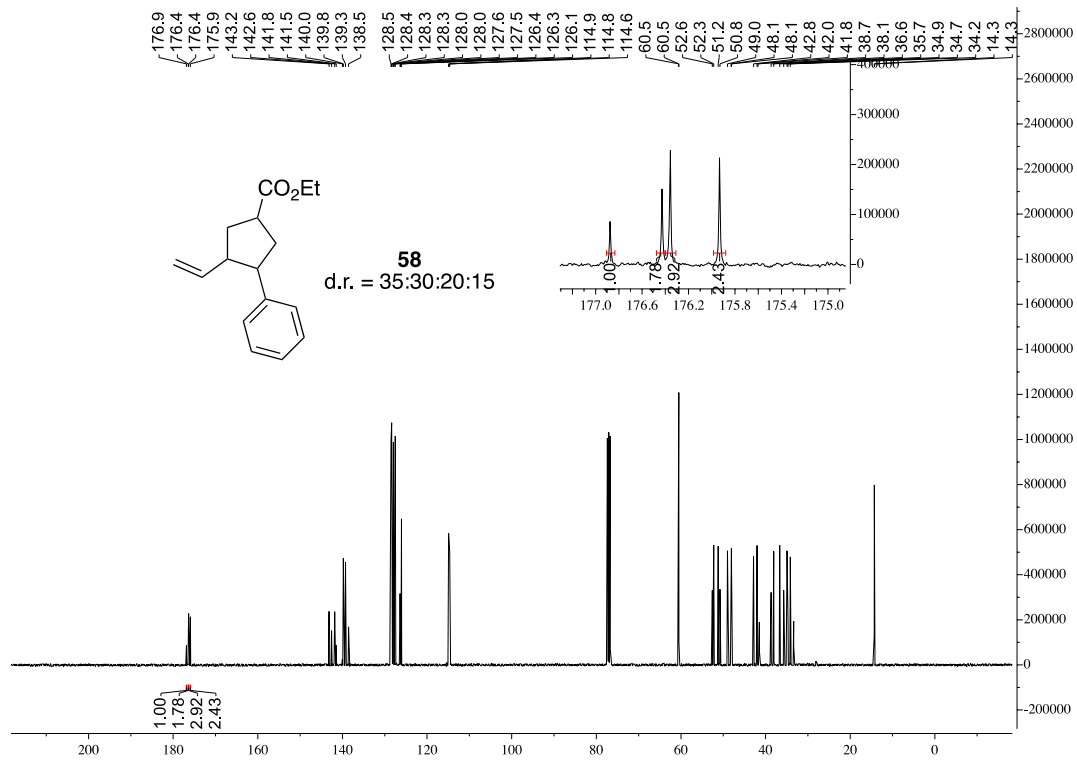

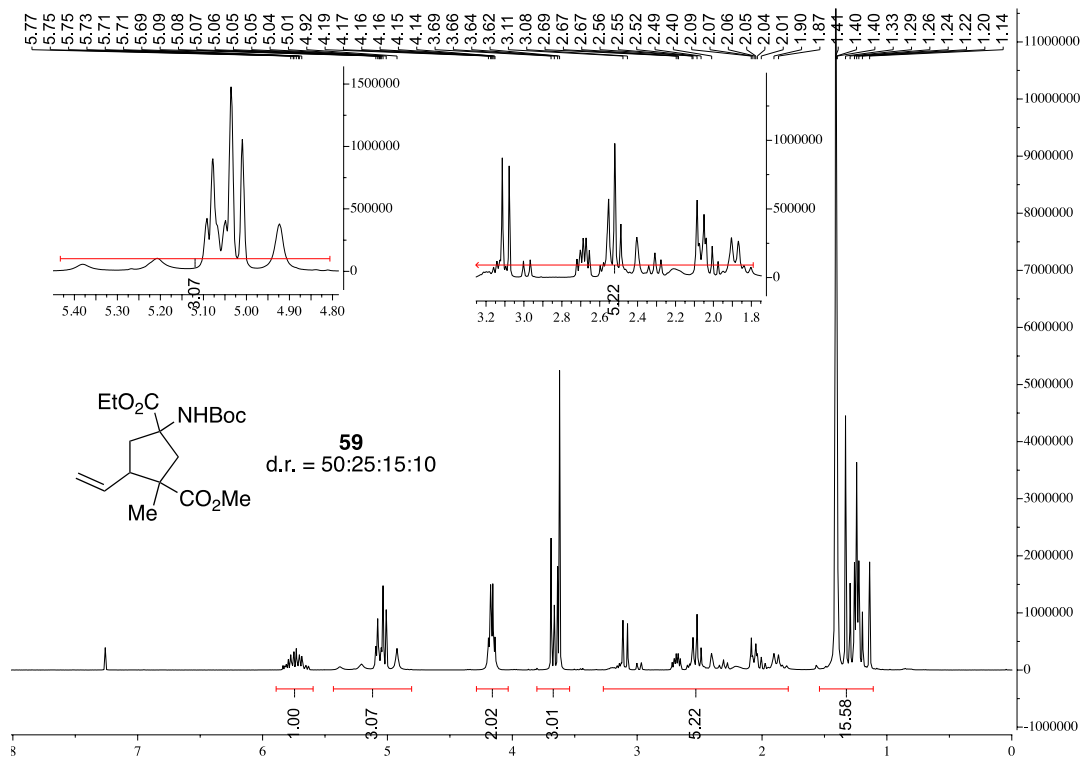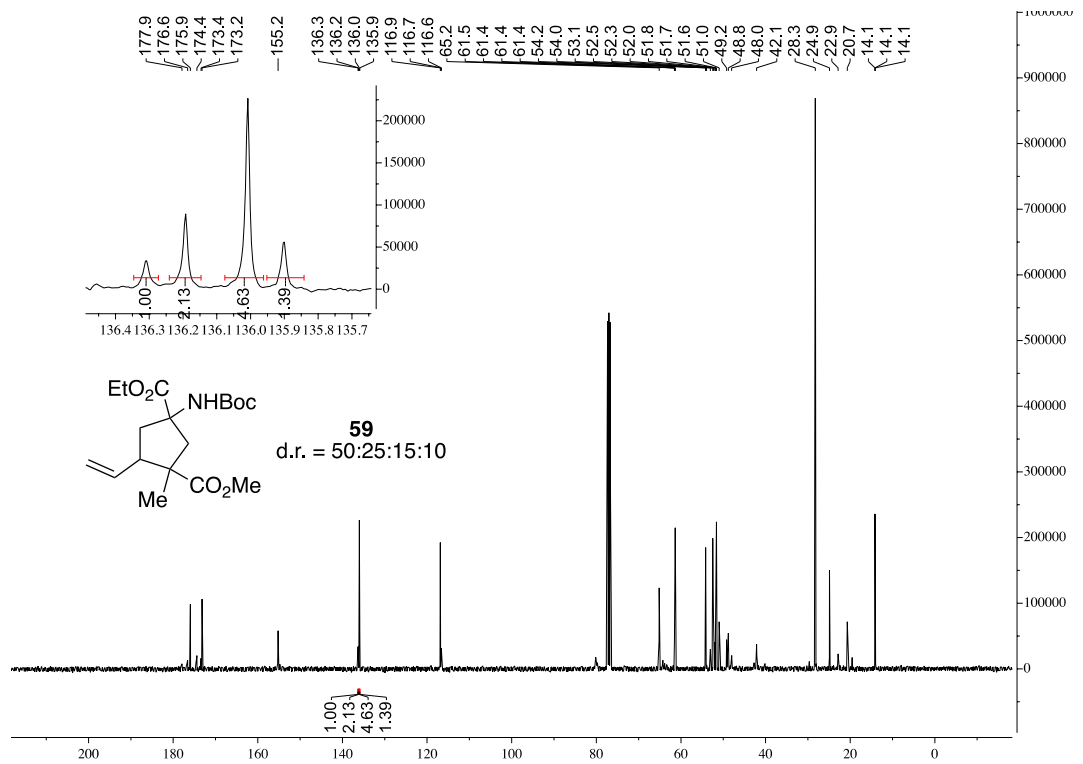

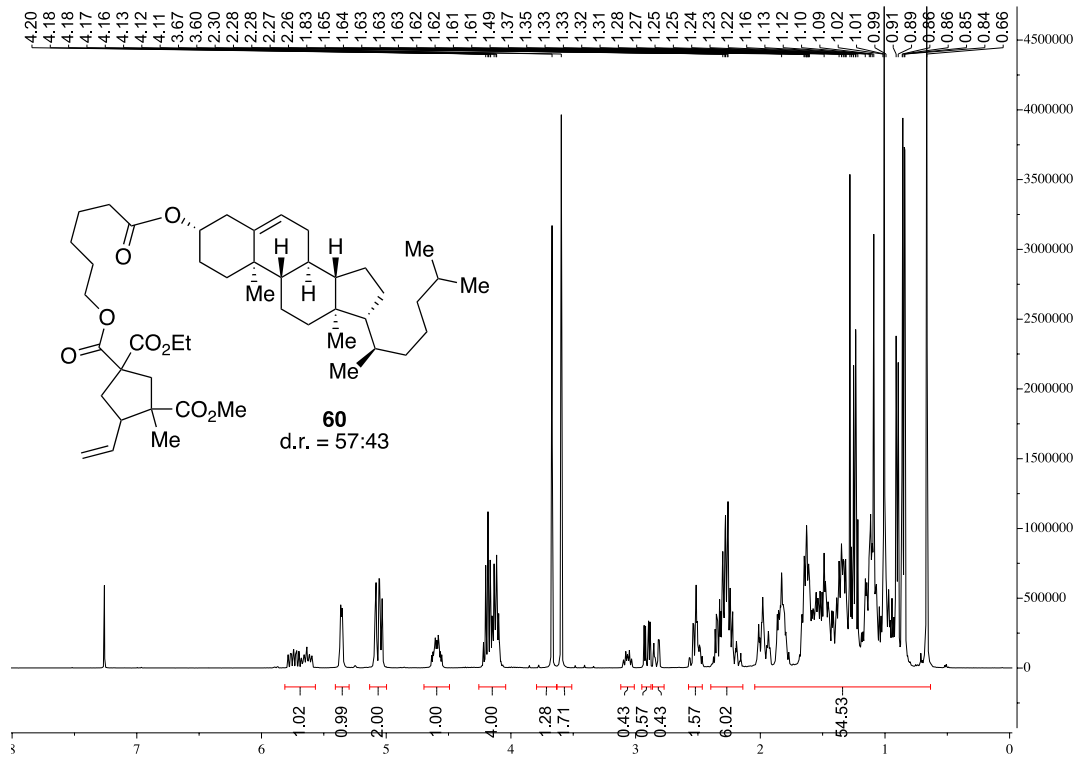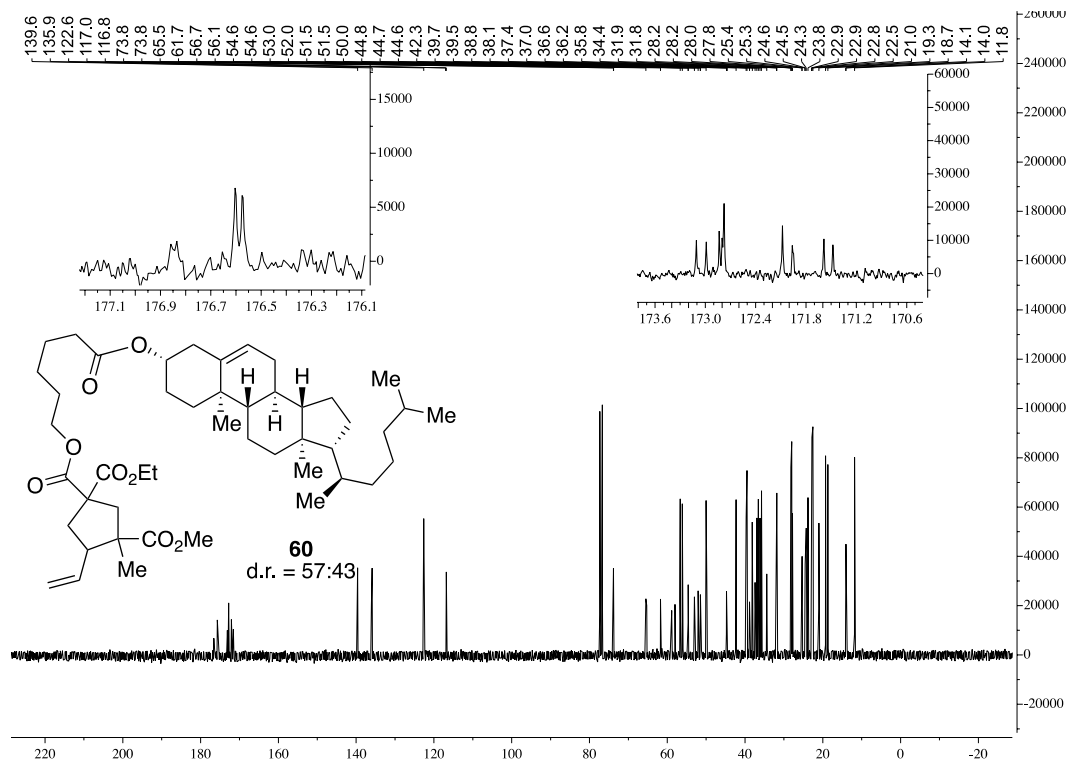





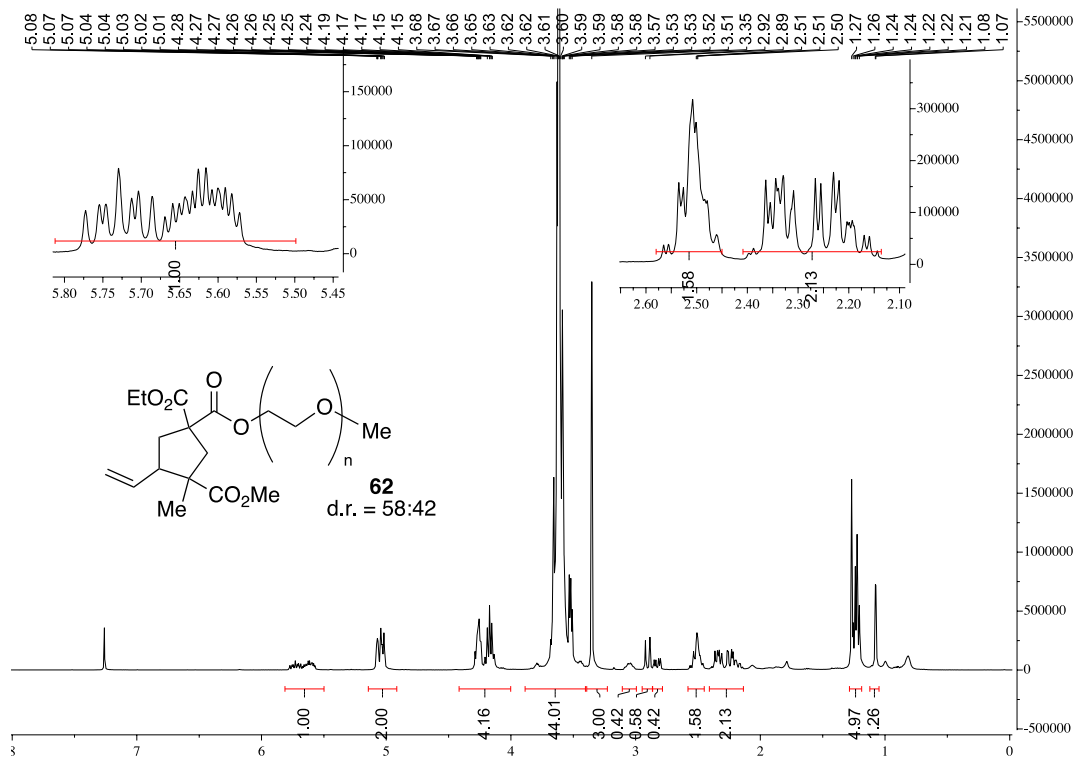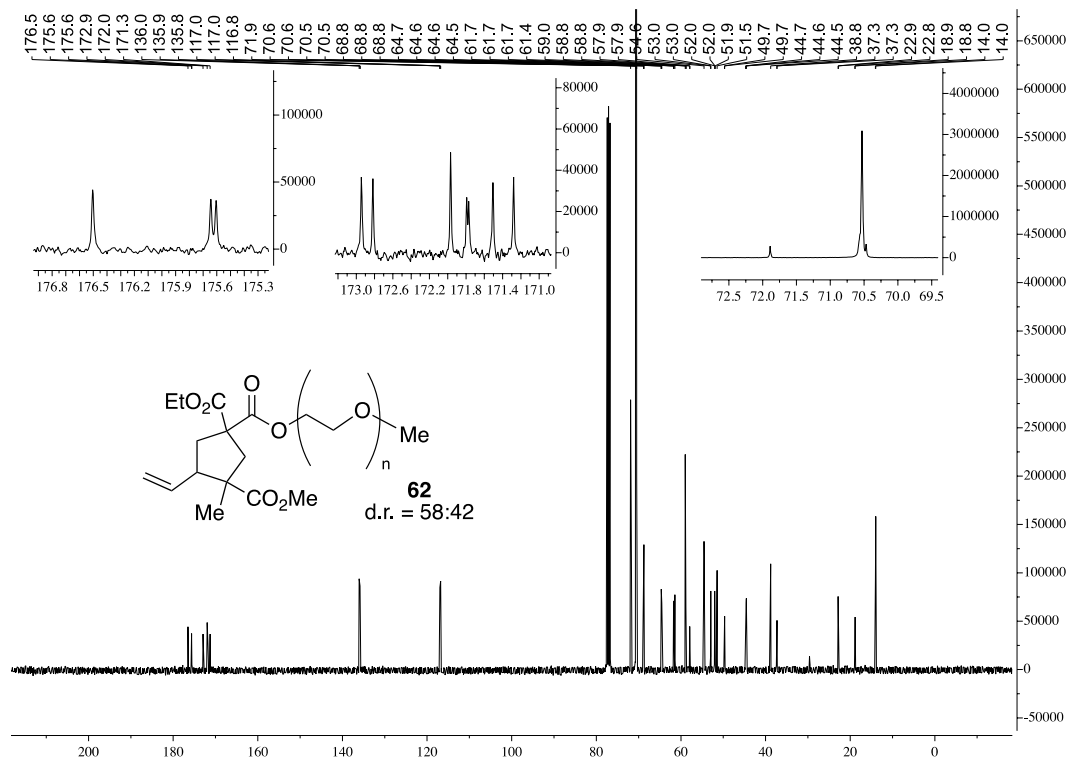

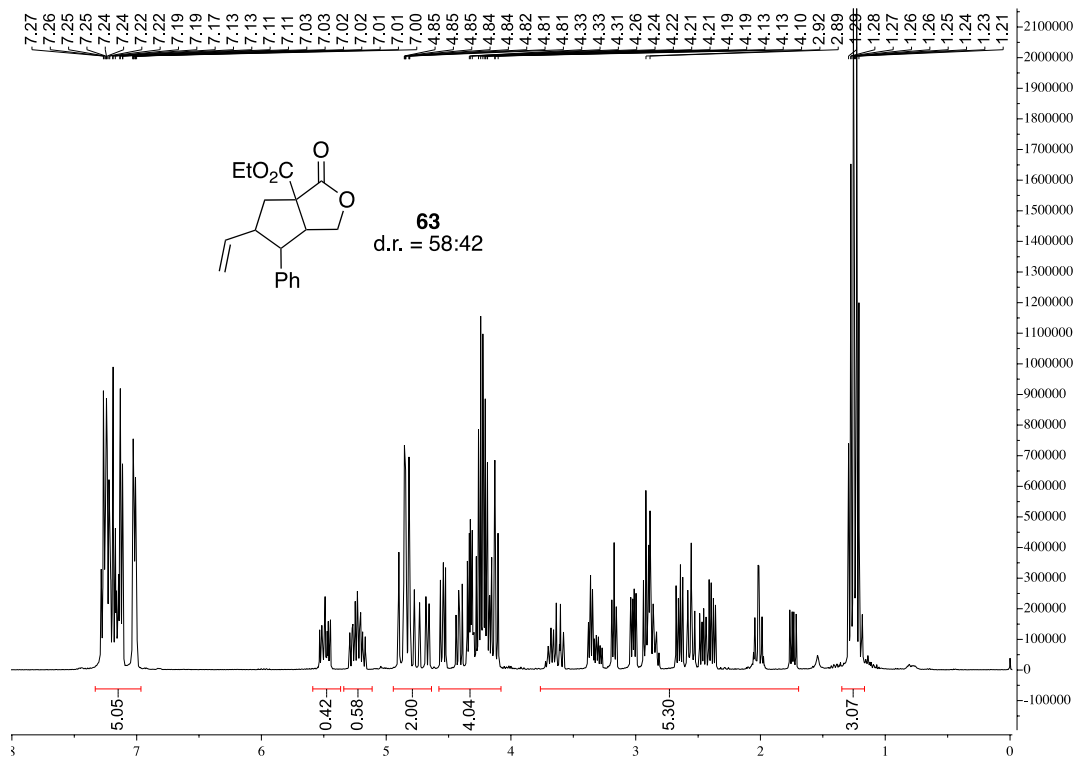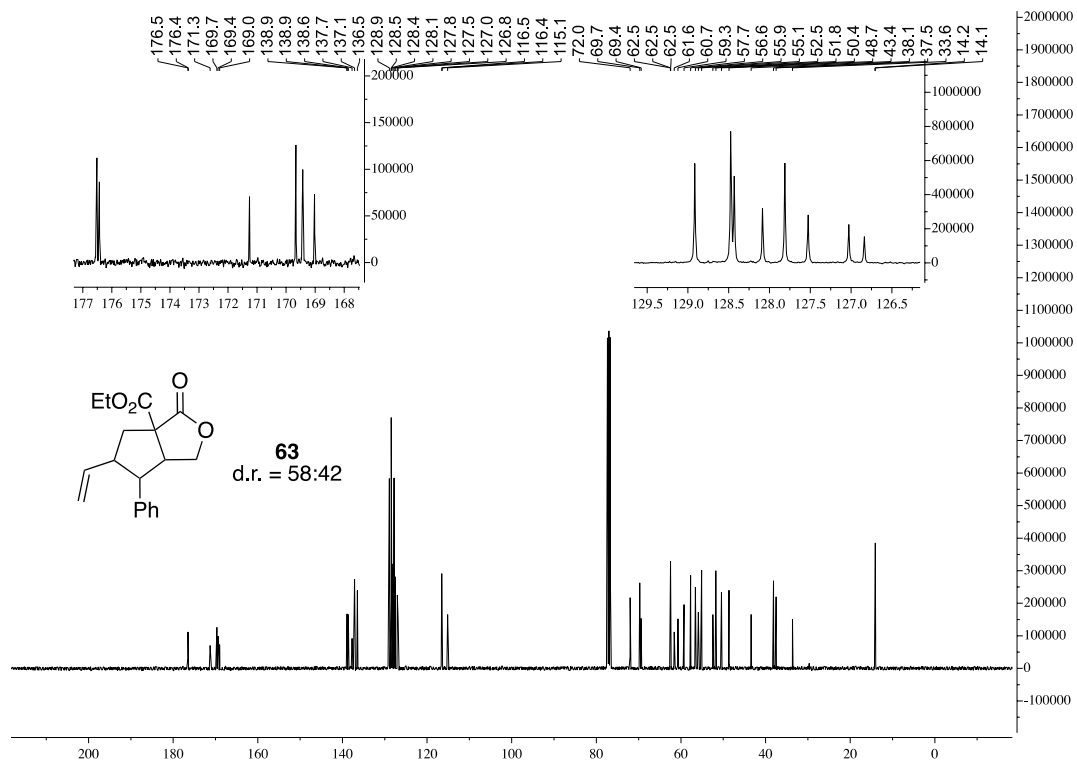

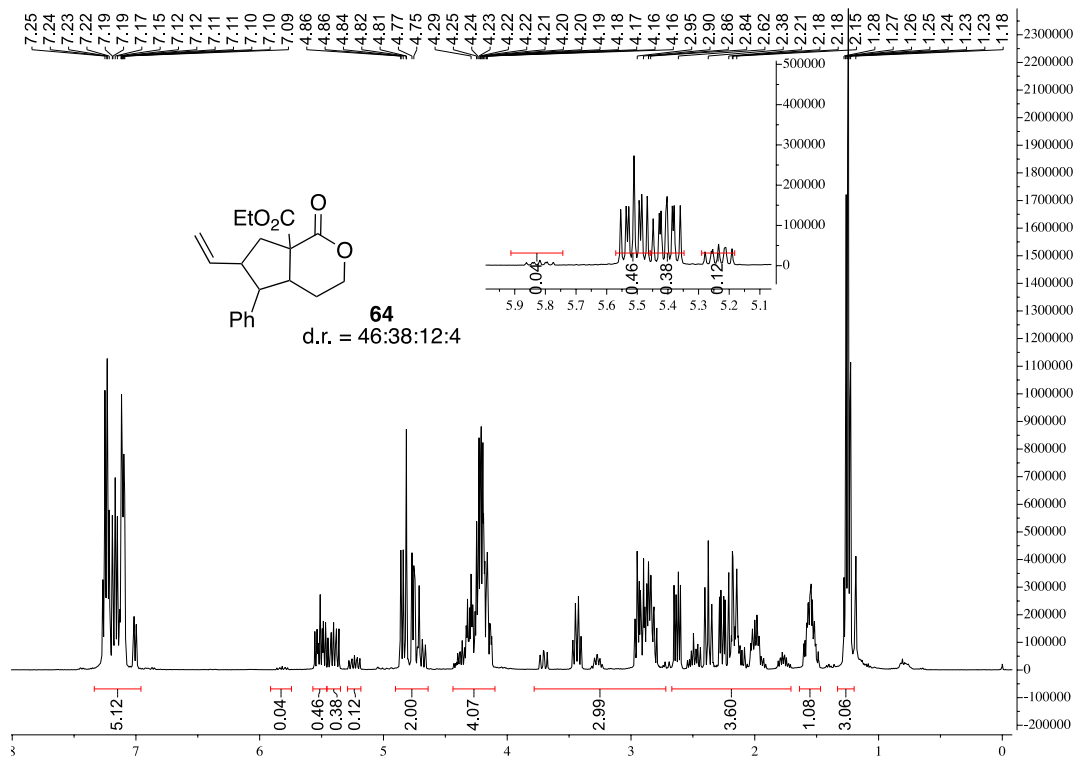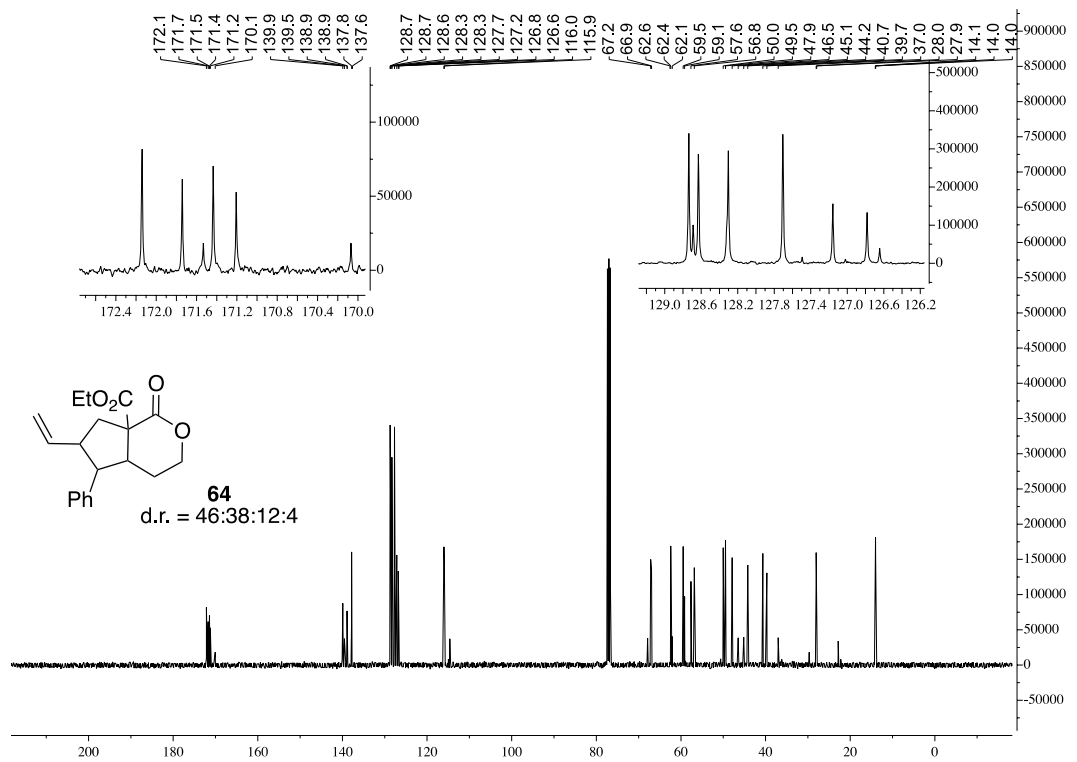



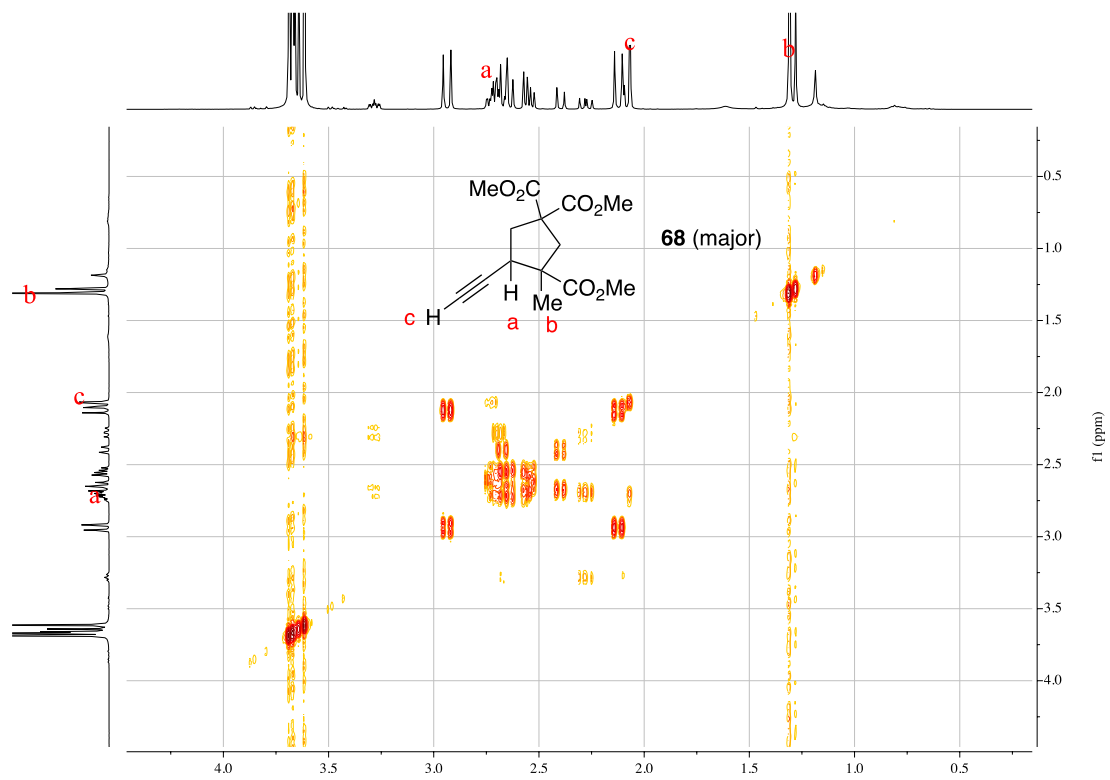

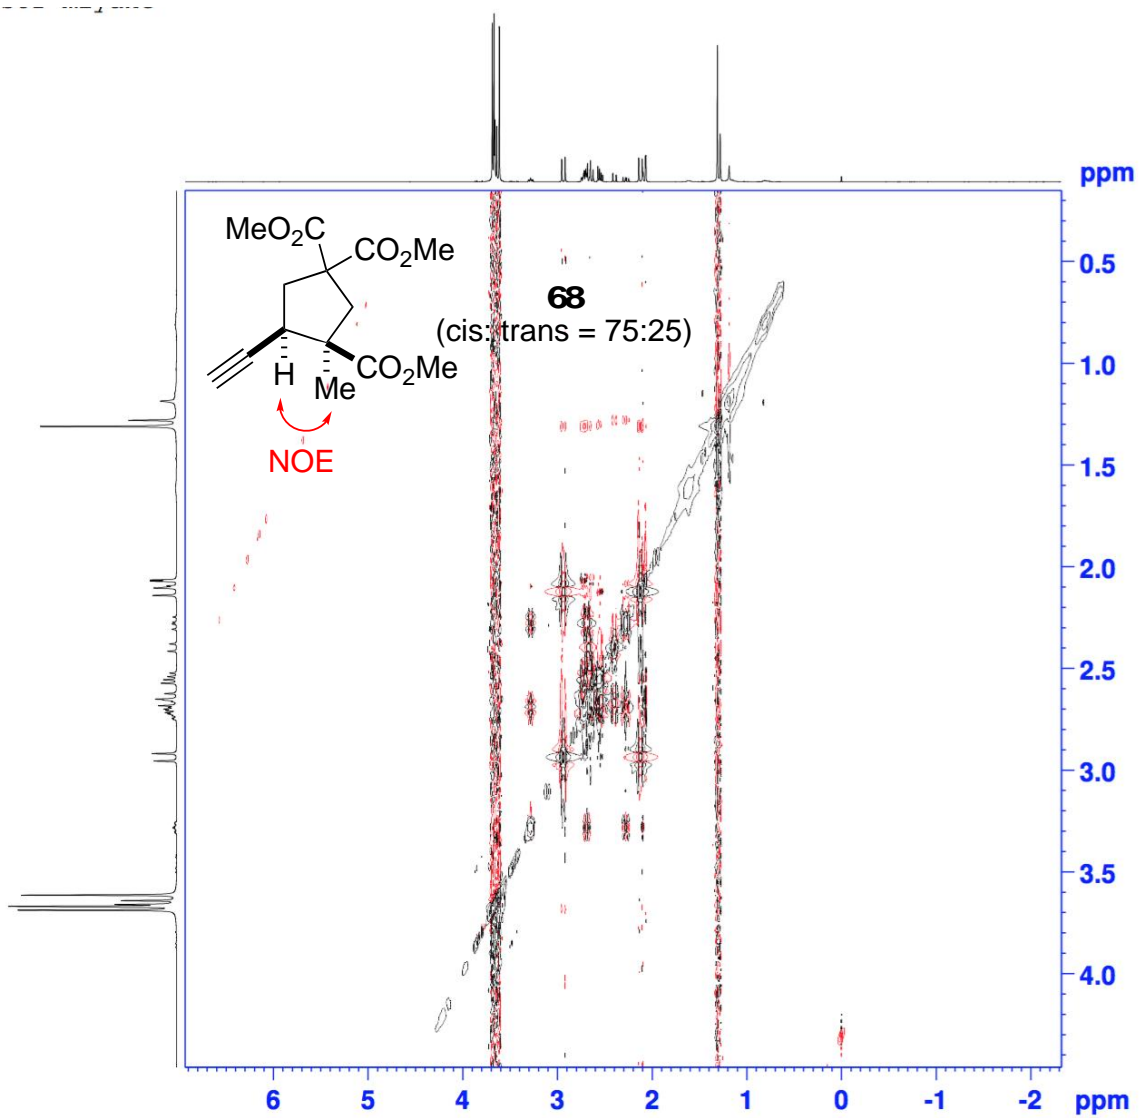

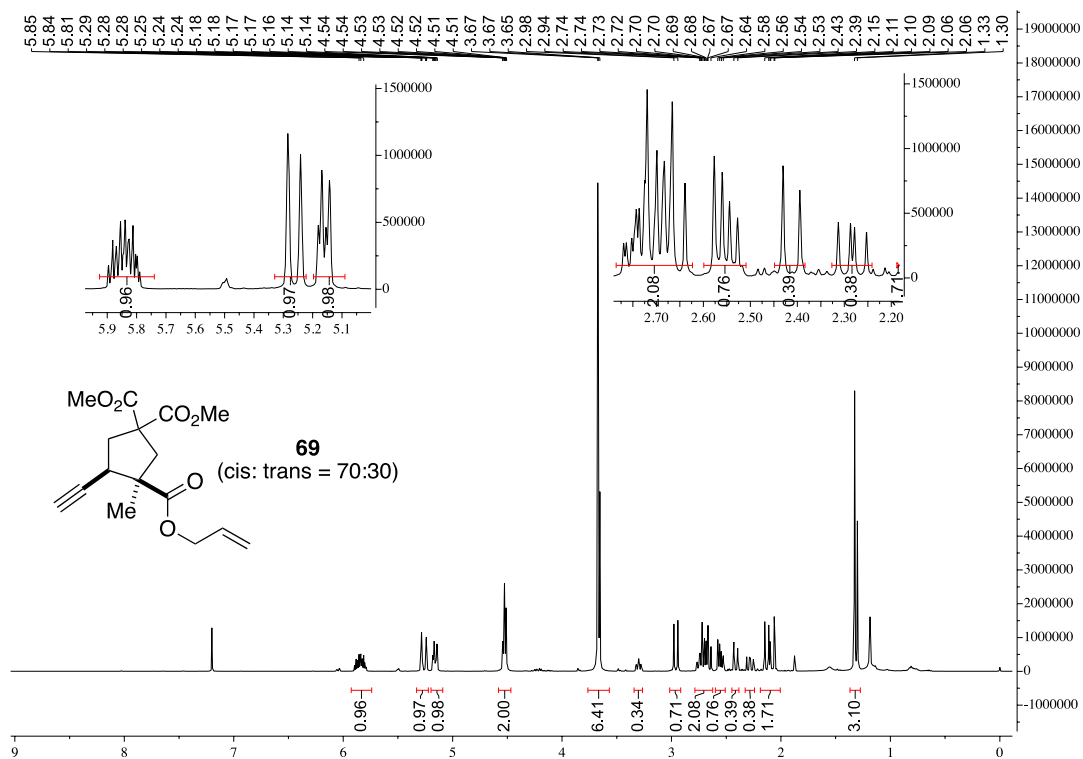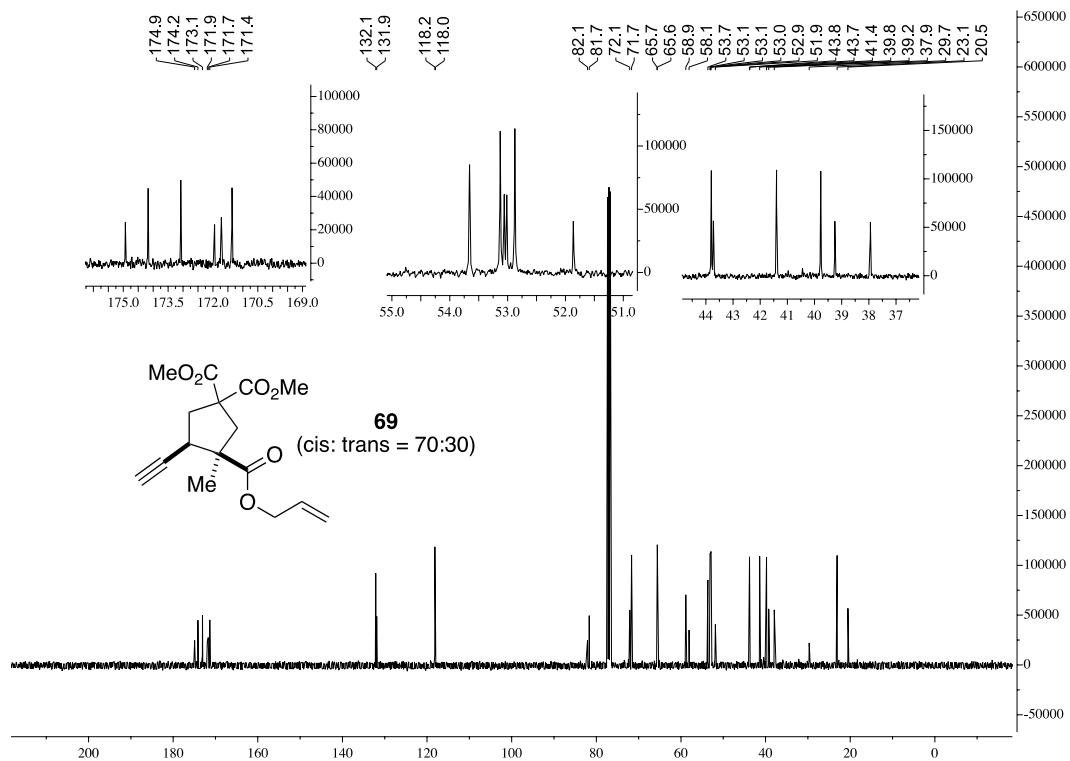

Supplement: NIHMS1580126-supplement-Supporting_Information.pdf [file NIHMS1580126-supplement-Supporting_Information.pdf]
